# Supplementary material for: Single-cell analysis of the aged ovarian immune system reveals a shift towards adaptive immunity and attenuated cell function
Source: eLife. 2023 Apr 25;12:e74915. doi: 10.7554/eLife.74915 (PMC10188116; doi:10.7554/eLife.74915)
Supplement: Supplementary file 1. [file elife-74915-supp1.xlsx]

## Sheet: Neutrophils
Up					Down
Name	FC	pVal	Qval		Name	FC	pVal	Qval
Sumo1	2.23185	0.0028011	0.0713847		Ube2w	0.114454	0.00011564	0.00679039
Tagln2	3.21873	0.000227706	0.0117892		Gm29325	0	0.00453746	0.092604
Hnrnpu	2.97581	0.000273633	0.0137333		Cflar	0.364384	0.00397804	0.0910049
Dync1i2	5.10138	0.00549529	0.1		Agap1	0	0.00126739	0.0435921
Gm10800	14.879	0.00297905	0.0736306		Elk4	0	0.00259189	0.0667446
Sirpb1b	10.3278	1.94308e-10	4.34412e-08		Rgs2	0.228908	2.76817e-08	4.25478e-06
Gm5150	2.05089	0.00145352	0.0477464		Ptgs2	0.245462	4.23998e-24	4.17088e-21
Tmem59	2.06017	0.00113232	0.0403576		Suco	0.22043	0.00326746	0.0795597
Cap1	2.53899	8.01016e-07	8.99929e-05		Sft2d2	0	1.63832e-05	0.00129969
Dck	2.64516	0.00303576	0.0742857		Acbd3	0	0.000907244	0.0335511
Aldh2	5.39365	0.00521977	0.1		Hlx	0.350095	0.00214151	0.0610103
Ubc	3.79084	4.99547e-13	1.53564e-10		G0s2	0.453766	4.86237e-15	1.83966e-12
Rabgef1	2.77291	0.00110348	0.0396167		Nelfb	0	0.000163104	0.00922103
Fis1	2.18631	0.00157592	0.0496871		Sp3os	0	0.00165985	0.0510251
Gimap1	4.46371	0.00554782	0.1		Acp2	0	0.00148525	0.0477464
Cnbp	2.90495	0.00202741	0.0600713		Thbs1	0.312744	3.49922e-06	0.000344219
Arhgdib	2.31252	2.05364e-05	0.00157826		Zfp106	0.165323	0.00338801	0.080893
Myadm	3.3816	0.00189353	0.0564446		Dusp2	0.261526	7.56834e-21	5.31785e-18
Ech1	4.34926	0.000701324	0.0280445		Bcl2l11	0.448733	0.00125807	0.0435921
Ldha	2.2233	0.000971159	0.0353826		Gm14005	0.330645	0.00451436	0.092604
Lsp1	2.23185	3.83046e-07	4.95793e-05		Il1a	0.150847	2.03923e-06	0.000213404
Ifngr1	3.60896	0.000634707	0.0262361		Il1b	0.489329	3.04624e-20	1.87287e-17
Itgb2	2.13482	0.0015898	0.0497771		Smox	0.418473	8.54436e-05	0.00545787
Ap1m1	3.61348	0.00492668	0.098906		Ppp1r16b	0	0.00453746	0.092604
Cpne2	2.8232	0.0025186	0.0667446		Oser1	0.491187	3.64822e-10	7.17753e-08
Atp6v0d1	2.23185	0.00328912	0.0796924		B4galt5	0	0.00453746	0.092604
Stk24	2.97581	0.00338098	0.080893		Zbp1	0	0.00453746	0.092604
St3gal4	2.84642	0.00486494	0.0980667		Cask	0.156621	0.00413929	0.092604
Trf	2.54296	0.00434289	0.092604		Elf4	0	0.000853124	0.0320313
Ewsr1	3.40092	0.00168167	0.0513746		Fndc3b	0.198387	0.000662293	0.0269215
Cd300ld	6.42774	2.45235e-07	3.25998e-05		Skil	0.493744	4.81149e-05	0.00342976
Cd300c2	2.31041	1.11091e-06	0.000121423		Atp11b	0.141705	1.08681e-07	1.52729e-05
Emb	2.45066	5.18221e-05	0.00358997		Slc7a11	0.337554	3.30544e-13	1.08386e-10
Pabpc1	2.10484	0.00396841	0.0910049		Nhlrc3	0	0.00453746	0.092604
Atp5j	2.15986	0.00433774	0.092604		Supt20	0	0.000600064	0.0258897
H2-Q10	23.8065	1.06073e-07	1.52729e-05		Nans	0	0.00453746	0.092604
Gm26917	2.6151	0.00529259	0.1		Tgfbr1	0.313243	0.0043301	0.092604
Ccnd3	2.59005	0.00255617	0.0667446		Nr4a3	0.227319	3.42947e-10	7.02828e-08
Tbc1d10c	4.27772	0.00181512	0.0544372		Rnf20	0	0.00218314	0.0610103
Anxa1	3.17419	0.000712494	0.0282614		Rgs3	0.22043	0.0053911	0.1
					Gm12840	0.259793	4.79776e-07	6.05073e-05
					Hdac1	0	0.00259189	0.0667446
					Sesn2	0	3.13623e-05	0.00230232
					E2f2	0	0.00453746	0.092604
					Vps13d	0	0.000163104	0.00922103
					Cpeb2	0.37788	0.00204565	0.0602487
					Dhx15	0.165323	0.00338801	0.080893
					Rhoh	0.14879	0.00358636	0.0843998
					Cxcl2	0.288876	3.31154e-46	1.62879e-42
					Rasgef1b	0.231452	2.32602e-06	0.000238345
					Spp1	0.242051	0.00414858	0.092604
					Srsf9	0	0.000853124	0.0320313
					Pomp	0.346024	0.0041154	0.092604
					Samd9l	0.185988	1.95035e-05	0.00152267
					Tes	0.425115	0.00300225	0.0738331
					Gm20186	0.358531	0.00552111	0.1
					Hilpda	0.27301	0.000205019	0.0109607
					Igkc	0	0.00259189	0.0667446
					Bhlhe40	0.460176	0.000179027	0.00985724
					Clec4n	0.370262	5.71881e-05	0.00380108
					Spsb2	0	0.00259189	0.0667446
					Chd4	0.297581	0.00428497	0.092604
					Olr1	0.286135	0.00142414	0.0476506
					Cdkn1b	0.393031	0.0054484	0.1
					Dedd2	0.478865	0.00207686	0.060804
					Sertad1	0.27469	0.000115969	0.00679039
					Zfp36	0.378601	6.62782e-23	5.43317e-20
					Ppp1r15a	0.447175	4.15761e-19	2.27214e-16
					Relt	0.165323	0.00473462	0.0958326
					Il4ra	0.145161	1.47609e-05	0.00121003
					Chst15	0.156621	0.00413929	0.092604
					Adam8	0.444661	0.00362497	0.0849023
					Ifitm5	0	0.000853124	0.0320313
					E230032D23Rik	0.119032	0.00018717	0.0101165
					Fbxo30	0	0.00153459	0.0490122
					Tnfaip3	0.499252	1.11793e-11	3.05476e-09
					Hbs1l	0	0.000490899	0.0219499
					Cd164	0.278982	0.00396791	0.0910049
					Gadd45b	0.422859	2.63453e-28	6.47899e-25
					Osbpl8	0	0.000853124	0.0320313
					Phlda1	0.141705	6.67979e-06	0.000608419
					Nab2	0	0.00148525	0.0477464
					Il23a	0.170421	3.84661e-09	7.00725e-07
					Papd5	0	0.00259189	0.0667446
					Sap18b	0	0.000248456	0.0127295
					Gm10073	0	0.00453746	0.092604
					6430548M08Rik	0.123992	0.000633339	0.0262361
					Gse1	0	0.00259189	0.0667446
					Irf2bp2	0.238065	9.78571e-05	0.00609255
					Gm31718	0.141705	0.00122545	0.0430529
					Ptger2	0	0.00453746	0.092604
					Gch1	0.355803	0.000303288	0.0147696
					Kctd12	0.355803	6.26529e-07	7.51607e-05
					Acod1	0.459961	5.2576e-05	0.00359161
					Sidt2	0.234932	0.00094657	0.0347442
					Sik3	0	0.000490899	0.0219499
					Bcl2a1d	0.206155	8.56268e-17	3.50964e-14
					Gm29562	0	0.00453746	0.092604
					Bcl2a1a	0.289734	1.35239e-12	3.91279e-10
					Bcl2a1b	0.284894	4.07549e-26	5.01134e-23
					Cdv3	0	0.00218314	0.0610103
					1700019L13Rik	0	0.000621983	0.0262361
					Med7	0.119032	3.3315e-10	7.02828e-08
					Trim41	0	0.00259189	0.0667446
					Hnrnph1	0.191988	0.000564685	0.0245789
					Map2k4	0	0.00148525	0.0477464
					Borcs6	0.36545	0.00514389	0.1
					Scimp	0	0.00148525	0.0477464
					Zzef1	0	0.000490899	0.0219499
					Crk	0.205228	0.00154547	0.0490413
					Abr	0.357097	0.00178117	0.0537465
					Slfn1	0.281622	1.26604e-11	3.27738e-09
					Slfn4	0.234932	6.93801e-06	0.000620449
					Wfdc17	0.404991	0.00439012	0.092604
					Rps6kb1	0	0.00218314	0.0610103
					Kcnj2	0	5.04011e-07	6.19747e-05
					BC005537	0.168442	8.05058e-07	8.99929e-05
					Gadd45g	0.170046	0.00217755	0.0610103
					Nfil3	0.357097	0.00159901	0.0497771
					4833439L19Rik	0	0.00259189	0.0667446
					5430425K12Rik	0	0.000282834	0.0140517
					Dnmt3a	0	0.00453746	0.092604
					Gm17056	0.47235	0.000252171	0.0127867
					Dnajb9	0.330645	0.00249568	0.0667446
					Baz1a	0.223185	0.000227558	0.0117892
					Nfkbia	0.485501	2.29272e-27	3.75892e-24
					Fos	0.356634	1.05001e-08	1.72149e-06
					Jdp2	0.412035	0.00210103	0.0610103
					Nsmce2	0	0.000736107	0.0289644
					Csf2rb	0.290323	1.54697e-05	0.00124735
					Maff	0.380626	4.41273e-05	0.00319177
					Mefv	0.362903	0.00547245	0.1
					Parl	0	0.00259189	0.0667446
					Rtp4	0.250972	2.75618e-05	0.00208559
					Iqcg	0	4.2665e-09	7.39785e-07
					Cggbp1	0.33816	0.00225919	0.0627787
					Tmem181a	0	0.00453746	0.092604
					Tagap1	0	1.60907e-07	2.1984e-05
					Rab26os	0	0.00126739	0.0435921
					Dusp1	0.431004	4.66747e-19	2.2957e-16
					Ergic1	0	0.000490899	0.0219499
					Rab44	0.270528	0.000655123	0.0268519
					H2-Eb1	0.414025	0.00424637	0.092604
					H2-Q6	0.212558	0.00515158	0.1
					Ier3	0.181991	3.77891e-18	1.68969e-15
					Vegfa	0.371976	0.00278609	0.071372
					Smchd1	0.278982	0.00293407	0.0730671
					Egr1	0.327012	2.13972e-08	3.39491e-06
					Ptpn2	0.141705	0.000830502	0.0320313
					Chka	0.180352	0.00259035	0.0667446
					Grk2	0.315616	5.04222e-05	0.00354289
					Fam111a	0.343362	0.0013438	0.0455826
					A930007I19Rik	0	0.00148525	0.0477464
					Nfkb2	0.156621	0.00213231	0.0610103
					Mirt1	0.399735	0.00351487	0.083115
					4833407H14Rik	0.330645	0.00021748	0.0115019

## Sheet: Macrophages
Up					Down
Name	FC	pVal	Qval		Name	FC	pVal	Qval
4933411E06Rik	8.61162	0.0169221	0.0824927		Vcpip1	0.420079	0.00417925	0.0347209
Rassf5	2.03959	0.000335225	0.00588662		Arfgef1	0.440367	0.00230084	0.0228082
Rgs18	2.60143	0.00508079	0.0391843		Tram2	0.119606	0.0123789	0.0684943
1700025G04Rik	2.79878	0.00583418	0.0429131		Dst	0.435162	0.00312031	0.0280438
F11r	4.84404	0.00274462	0.0258641		Sema4c	0.307558	0.0229661	0.1
Cd244	2.21623	0.0174264	0.0840421		Tmem131	0.331216	0.0071962	0.0490449
Gata3	2.58349	0.00342544	0.0296842		Map4k4	0.452422	0.000789278	0.0106524
Il2ra	9.14985	0.0021016	0.0215276		Fhl2	0.0949811	0.00393604	0.0332789
Tprn	6.45872	0.0056914	0.0421053		Col3a1	0.0217465	0.00675545	0.0472639
Rasgrp1	2.40132	0.0176345	0.0848783		Slc40a1	0.100917	1.65077e-05	0.000662789
Apmap	2.51172	0.00935085	0.0572947		Gls	0.442378	0.000102412	0.00259067
Gm20721	8.61162	0.0169221	0.0824927		Coq10b	0.463125	0.000424069	0.00690179
Pdzd11	2.24651	0.00194201	0.0202565		Spats2l	0.0672783	0.000574394	0.00848308
Gm9733	2.59327	0.000215925	0.00431321		Fam126b	0.269113	0.00901663	0.0555879
Sirpb1a	3.99825	0.000887422	0.0115104		Cflar	0.380176	3.26864e-09	5.67742e-07
Sirpb1b	13.9939	1.83191e-11	5.8547e-09		G730003C15Rik	0	0.0251373	0.1
Sirpb1c	3.08257	1.4566e-09	2.90952e-07		Bmpr2	0.250338	5.79698e-05	0.00168426
Tsacc	9.68807	0.0185434	0.0879808		Raph1	0.426096	0.00223056	0.0224458
Rorc	Inf	0.00647298	0.0461465		Nrp2	0.365785	9.1009e-05	0.00236088
Pogz	3.40877	0.00756947	0.0503109		Akr1cl	0.365225	0.0199881	0.0927425
Selenbp1	2.40132	0.0117382	0.0665626		Tns1	0.307558	0.0138547	0.0732338
Gm26530	Inf	0.00733549	0.0496104		Catip	0	0.0251373	0.1
Galt	2.0593	0.00511072	0.0393013		Usp37	0.456677	0.0170921	0.0829888
Cd72	2.1253	0.000189146	0.00391518		Ttll4	0	0.014097	0.0732338
Ncbp1	2.22979	0.0118716	0.0670186		Serpine2	0	0.00745482	0.0499003
Hsdl2	3.65994	0.000346433	0.00599288		Cul3	0.232176	3.78107e-06	0.000204124
Akna	2.38357	0.00449112	0.0365235		Col4a4	0.107645	0.0213453	0.0971136
Focad	9.68807	0.00969853	0.058552		Agfg1	0.489297	0.0259187	0.1
Itgb3bp	8.61162	0.0169221	0.0824927		Trip12	0.440956	6.19381e-05	0.00177376
Dhcr24	Inf	0.025121	0.1		Sp110	0.0512596	8.01297e-05	0.00214123
9530034E10Rik	5.38226	0.0165087	0.081074		Sp140	0.179409	0.000144646	0.00328054
Nfyc	2.9423	0.000269299	0.00507469		Gigyf2	0.435162	0.00276045	0.0259352
Zbtb8os	2.04526	0.00828823	0.052893		Ppip5k2	0.287054	0.0144445	0.0743619
Sytl1	Inf	0.0140809	0.0732338		2310035C23Rik	0.480968	0.00583244	0.0429131
Padi2	3.22936	0.0230408	0.1		Tnfrsf11a	0.496824	0.000845587	0.0110938
Abcb1b	3.22936	0.00437638	0.0357534		Zcchc2	0.41402	0.0155506	0.0779425
5830416I19Rik	Inf	0.0140809	0.0732338		2900060B14Rik	0.327616	0.0171875	0.0831774
Tmem119	3.6208	0.00366185	0.0315213		Dennd1b	0.224261	0.000752768	0.0102248
Ubc	3.14177	7.94297e-14	3.73315e-11		Ptgs2	0.403231	0.000330969	0.00582468
Hspb1	6.45872	0.0248436	0.1		Edem3	0.195719	0.0144706	0.0744006
Cav2	2.69113	0.0128596	0.0700637		Lamc1	0	0.000904369	0.0115599
Il23r	Inf	0.025121	0.1		Cep350	0.40831	0.0108357	0.0634691
Mcm2	2.55657	0.0208983	0.0957978		Tor1aip2	0.444622	0.00289385	0.0267379
Pparg	2.30138	0.00100869	0.0125339		Rasal2	0.269113	0.00901663	0.0555879
Tmcc1	2.15291	0.00157384	0.0175871		Rc3h1	0.333188	0.000255242	0.00491412
Cd27	5.38226	0.0165087	0.081074		Prdx6	0.409289	1.66136e-05	0.000663704
Scnn1a	Inf	0.0193998	0.090616		Suco	0.358818	0.0138876	0.0732338
Klra2	2.93034	0.000294325	0.005369		Prrx1	0	0.00796898	0.0517653
Tmem238	2.9218	0.0183709	0.0873182		Gorab	0.215291	0.00852711	0.0539642
Zscan18	Inf	0.025121	0.1		Atp1b1	0.119606	0.0123789	0.0684943
Dmac2	2.82569	0.0143404	0.0741126		Xcl1	0.286146	0.0138794	0.0732338
Tmem91	8.61162	0.0169221	0.0824927		Sft2d2	0.391437	0.00299874	0.0274138
Shkbp1	2.42202	0.00223618	0.0224458		Pbx1	0.230668	0.00772613	0.0508911
Zfp382	Inf	0.00795499	0.0517653		Uhmk1	0.396588	0.00262773	0.0250242
Haus5	11.841	0.00320336	0.0285334		B930036N10Rik	0.301407	0.0238357	0.1
Josd2	2.07602	0.00286559	0.026592		Slamf7	0.232176	0.000354108	0.00603598
Il4i1	Inf	0.0193998	0.090616		Kcnj10	0.370031	0.00517009	0.0395145
Svip	6.45872	0.0056914	0.0421053		Pigm	0.430581	0.0188811	0.0889493
Ears2	5.02345	0.00855739	0.0539642		Ifi214	0	0.00485553	0.0381342
Lat	5.38226	0.00743458	0.0499003		Ifi209	0.188118	8.09566e-05	0.00215612
Spn	2.23264	0.00627763	0.0451058		Ifi204	0.313965	3.53742e-06	0.000192269
BC017158	3.94699	0.0244333	0.1		Mndal	0.407387	8.18863e-09	1.2582e-06
9430038I01Rik	2.53735	0.0037336	0.032042		Ifi211	0.2579	0.000505835	0.00770135
Ifitm6	2.8611	0.000556821	0.00826941		Ifi203	0.329598	2.44807e-08	3.15462e-06
Sigirr	9.68807	0.00969853	0.058552		Ifi202b	0.374168	4.77921e-07	3.81854e-05
Mthfd1l	4.30581	0.0046425	0.0372047		Ifi205	0.0733945	9.13726e-06	0.000417176
Ifngr1	2.02321	8.0054e-09	1.25416e-06		Itpkb	0.399508	1.24984e-05	0.000534014
Smpd2	3.01407	0.0266365	0.1		Wdr26	0.434358	1.14166e-06	7.40408e-05
Thop1	3.22936	0.00771769	0.0508911		Hlx	0.455422	0.0228509	0.1
Mdm1	3.58818	0.00481768	0.0379987		Kcnk2	0	0.0251373	0.1
Tnfsf13b	2.87054	0.016116	0.0799785		Dclre1c	0.339932	0.00173609	0.0189757
Dcun1d2	3.76758	0.012598	0.0692749		Frmd4a	0.458065	0.00489689	0.0382834
Mtus1	3.07558	0.00937225	0.0572975		Optn	0.269113	0.0243043	0.1
Cyp4f18	2.79464	8.33373e-06	0.00038939		Itih5	0.0768895	0.00684691	0.0477365
Podnl1	5.65138	0.00147486	0.0168584		Pfkfb3	0.461337	0.00868406	0.054282
Adgrg5	2.3682	0.0266896	0.1		Mrc1	0.281847	1.51802e-11	5.05367e-09
Tppp3	4.01223	0.00737063	0.0496548		Nsun6	0.256298	0.0042276	0.0350032
Acd	2.22979	0.0189421	0.0891314		Arl5b	0.263621	0.000345011	0.00599288
Dhodh	2.55657	0.0256508	0.1		Bmi1	0.228338	0.000101271	0.00258063
Atmin	2.3682	0.0228207	0.1		Arhgap21	0.336391	0.0209727	0.0960834
Tspan14	2.04526	0.00204903	0.0211041		Pdss1	0.0978593	0.00796695	0.0517653
Gm7324	3.94699	2.80705e-05	0.000985421		Il1rn	0.188831	3.58743e-11	1.02369e-08
Dhrs4	2.22467	0.0121634	0.0680086		Ehmt1	0.435162	0.00134868	0.0155945
Dhrs1	2.54949	0.00067211	0.00949041		Tmem203	0.284943	0.000902165	0.0115599
Tpm3-rs7	4.24915	2.80507e-14	1.49415e-11		Nacc2	0.269113	0.000878097	0.0114266
Gm26870	4.30581	0.014752	0.0755074		Snapc4	0.0978593	0.00796695	0.0517653
Gm26733	12.9174	0.00184427	0.019584		Med22	0.358818	0.0239306	0.1
Zfp846	9.68807	0.00969853	0.058552		Vav2	0.411585	0.00553774	0.0414015
Cd3g	7.65477	0.00118674	0.0141311		Ralgds	0.272903	0.000124051	0.00294988
Cd3e	3.98921	0.000812295	0.0108528		Setx	0.461337	0.0192262	0.0902557
Zbtb16	10.7645	0.00556975	0.0414741		Tbc1d13	0.283277	0.00538114	0.0406378
Cxcr6	2.12787	0.0193658	0.090616		Ier5l	0.165608	0.00855331	0.0539642
Nipsnap1	4.66463	0.0088624	0.0551907		Ass1	0.441261	6.71562e-05	0.00188271
Phykpl	4.66463	0.0088624	0.0551907		Fubp3	0.269113	0.00180506	0.0193941
Eno3	3.04995	0.0188062	0.0886487		Prrc2b	0.358818	0.00806642	0.0520176
Unc119	2.23264	0.00133905	0.0155281		Stxbp1	0.134557	0.0214528	0.0971136
Mrpl10	2.0931	0.0145317	0.0746666		Fam129b	0.38784	4.49031e-05	0.00141248
Tns4	2.55657	0.020339	0.0939345		Rabepk	0.269113	0.00901663	0.0555879
Ace	6.30494	0.000711298	0.00990104		Rpl35	0.482471	3.06039e-23	6.11306e-20
Tmc8	4.30581	0.0224439	0.0999579		Gtdc1	0.107645	0.00715109	0.0489182
Cbx8	5.92049	0.00970261	0.058552		Acvr2a	0.119606	0.0123789	0.0684943
Tcrg-C1	10.2263	0.00437291	0.0357534		Nmi	0.495168	0.00967617	0.058552
Serpinb1a	4.0367	0.0259815	0.1		Rif1	0.358818	0.0058674	0.042994
Susd3	2.39212	4.87619e-05	0.00148703		Arl5a	0.421221	0.0184297	0.0874933
Auh	2.08563	0.0248044	0.1		Fmnl2	0.0768895	6.87331e-06	0.00033486
Pole2	10.7645	0.00556975	0.0414741		Gpd2	0.358818	0.00735958	0.0496221
Batf	2.46046	0.000168765	0.00362478		2023-03-07	0.424057	0.000215933	0.00431321
Asb2	3.67788	0.00382037	0.0325073		Ifih1	0.300405	0.00027392	0.00514964
Mfng	2.60143	0.00753156	0.0501888		Scn7a	0	0.0251373	0.1
Naga	4.30581	0.00109181	0.0132777		Cers6	0.394194	0.000767585	0.0103825
Pphln1	2.25076	0.0257552	0.1		Nup35	0.396588	0.0248743	0.1
Bin2	2.47423	9.09617e-08	9.69033e-06		Itgav	0.375127	0.000311483	0.00555517
St3gal6	2.46951	0.000102769	0.00259067		Ctnnd1	0.425574	0.00389826	0.0330217
Hlcs	6.99694	0.00333272	0.0291655		Serping1	0.082804	0.00757507	0.0503109
Rnaset2b	4.66463	7.4939e-06	0.000357712		Timm10	0.415203	4.68692e-05	0.00144587
1700010I14Rik	Inf	0.025121	0.1		Rapsn	0.161468	0.00249165	0.0240726
Zfp51	Inf	0.0140809	0.0732338		Ckap5	0.40367	0.0152731	0.0772834
Cyp4f16	2.38357	0.00807717	0.052045		Mdk	0	0.00992663	0.0594994
Cyp4f13	2.69113	0.0106823	0.0628962		Phf21a	0.40367	0.0152731	0.0772834
Kank3	4.0367	0.0115145	0.0659495		Abtb2	0	0.00375705	0.0321397
Ltb	2.97441	0.000111118	0.00269664		Hipk3	0.20931	0.00028	0.00519404
AY036118	2.21271	0.00558581	0.0415516		Fmn1	0.192224	0.000108185	0.00266935
Runx2	9.68807	0.00969853	0.058552		Thbs1	0.216372	2.80394e-06	0.000159525
Ccnd3	2.26331	9.90291e-08	1.02757e-05		Rhov	0.205039	0.0107322	0.0631137
Treml4	2.84943	0.00370083	0.0317949		Vps18	0.371191	0.00504631	0.0391071
Adgre4	2.19596	0.0164805	0.081074		Ino80	0.430581	0.0111022	0.06456
Dus3l	2.15291	0.020037	0.0929155		1700020I14Rik	0.427415	0.000111265	0.00269664
Tnfsf9	3.52294	0.00578174	0.0427341		Mga	0.379924	0.00377926	0.0322606
Myl12b	2.01173	1.12268e-10	2.80316e-08		Stard9	0.386419	0.00182516	0.0195151
Gm10093	2.79878	0.00439746	0.0358523		Mfap1a	0.4364	0.0040171	0.0337831
Cep76	Inf	0.025121	0.1		Eif3j1	0.172232	3.00524e-10	6.86045e-08
Smad2	6.45872	0.0002275	0.00448815		AA467197	0.0283277	0.0238808	0.1
Cd226	8.07339	0.00356669	0.0307416		Slc30a4	0	0.006486	0.0461465
Zdhhc24	Inf	0.025121	0.1		Sema6d	0.215291	0.00128742	0.0150605
Frmd8	2.53735	0.00450772	0.0365235		Hdc	0.185595	0.0181854	0.086628
Gm9493	2.26556	3.82214e-08	4.55798e-06		Snrnp200	0.366452	0.000437099	0.00702194
As3mt	2.20183	0.00320302	0.0285334		Tmem127	0.318949	0.00301283	0.0274797
					Mertk	0.475642	0.0177796	0.0854221
					Tmem87b	0.492093	0.0216746	0.097675
					Il1a	0.234011	0.00236778	0.023356
					Adam33	0.256298	0.016175	0.0801219
					Siglec1	0.153779	2.06704e-05	0.000771749
					Pank2	0.391437	0.00089563	0.0115599
					Smox	0.421853	1.99529e-05	0.000748459
					Slx4ip	0.339932	0.0158768	0.0791847
					Jag1	0.0633207	0.00251775	0.0242661
					Flrt3	0.128149	0.00400702	0.0337362
					Rrbp1	0.478265	7.58254e-19	7.57297e-16
					Rin2	0.483024	0.00120052	0.0142315
					Ralgapa2	0.230668	0.0136654	0.0725003
					Ncoa6	0.358818	0.0058674	0.042994
					Procr	0.146789	0.00192593	0.020115
					Tgm2	0.473639	0.00333907	0.0291891
					Mafb	0.48004	4.89827e-08	5.51221e-06
					Gm14221	0	0.00258669	0.0247217
					Slpi	0.104909	0.00199035	0.0206483
					Sdc4	0.443482	0.000125878	0.0029756
					Znfx1	0.421221	0.0043057	0.0355394
					Tmem189	0.476123	0.000249621	0.00485267
					Tshz2	0.358818	0.0254121	0.1
					Zbp1	0.31863	9.32803e-06	0.000418957
					Lsm14b	0.0598029	0.000198117	0.0040588
					Helz2	0.248412	0.0217439	0.0978771
					Clcn5	0.293578	0.00941719	0.0574808
					Kdm6a	0.291539	1.89373e-05	0.000732708
					Timp1	0.180844	0.00712816	0.0489182
					Lonrf3	0	0.0014814	0.0169089
					Stag2	0.440367	0.000457529	0.00721027
					Gpc4	0	0.0194164	0.090616
					Ints6l	0.307558	0.0116079	0.0662824
					Htatsf1	0.483305	0.00548205	0.0411277
					Ids	0.188379	5.10613e-06	0.000254984
					Mtm1	0.248412	0.00102434	0.0127086
					Pls3	0	0.00796898	0.0517653
					Tbl1x	0.293578	0.000841464	0.0110898
					Tab3	0	0.014097	0.0732338
					Amer1	0	0.014097	0.0732338
					Ar	0	0.006486	0.0461465
					Stard8	0.158302	8.81355e-06	0.000407048
					Taf1	0.307558	0.00149938	0.0169927
					Itm2a	0.122324	0.0125315	0.0690517
					Gla	0.475905	0.00322901	0.028688
					Armcx3	0.36826	0.00148675	0.0169216
					Zmat1	0.195719	0.0144706	0.0744006
					Rnf128	0.0717635	0.0083703	0.0532186
					Tbc1d8b	0	0.0251373	0.1
					Acsl4	0.472589	0.0111594	0.0646713
					Tmem164	0.438555	0.0159755	0.0794785
					Huwe1	0.487992	0.000672296	0.00949041
					Mbtps2	0.334071	0.00154669	0.0173525
					Rps6ka3	0.41862	0.0032865	0.0288558
					Reps2	0.201835	0.00772047	0.0508911
					Rab9	0.484404	0.00174356	0.0190062
					Mid1	0.107645	0.0133906	0.0717086
					Gm21887	0	0.0123508	0.0684943
					Cp	0.0430581	9.77996e-08	1.02757e-05
					Tnfsf10	0.143527	0.0210157	0.0961703
					Fndc3b	0.422138	0.000647958	0.00924485
					Phc3	0.269113	7.87561e-05	0.0021187
					Gnb4	0.179409	0.00130387	0.0151863
					Atp11b	0.406209	0.000441593	0.00704866
					Slc7a11	0.130479	8.82677e-08	9.5304e-06
					Sertm1	0	0.014097	0.0732338
					Rap2b	0.481429	6.12981e-07	4.755e-05
					Dhx36	0.461337	0.0190492	0.0894775
					Ccnl1	0.487818	2.59163e-07	2.25074e-05
					Rapgef2	0.336391	0.00246922	0.024001
					Fnip2	0.20931	0.000176549	0.00371212
					Fcrls	0.283751	2.96014e-07	2.48961e-05
					Etv3	0.411009	0.00229777	0.0228062
					Slc39a1	0.44692	7.47682e-07	5.34065e-05
					S100a16	0.082804	0.00485871	0.0381342
					Pip5k1a	0.445429	0.0134875	0.0720347
					Setdb1	0.4364	0.0108057	0.0633897
					Arnt	0.40831	0.00760427	0.0504629
					Ctsk	0.0936046	0.00741757	0.0498449
					Mcl1	0.499333	1.69794e-07	1.59605e-05
					Fam46c	0.250681	1.69289e-05	0.000672937
					Trim33	0.430581	0.0222451	0.099572
					Magi3	0	0.0251373	0.1
					Slc16a1	0.189962	0.00954926	0.0580651
					Lrif1	0.334071	0.00263708	0.0250833
					AI504432	0.391437	0.00528781	0.0401607
					Rbm15	0.350473	0.000741399	0.0101957
					Ahcyl1	0.48614	0.0245471	0.1
					Csf1	0.153779	0.00721773	0.0490814
					Wdr47	0.269113	0.0243043	0.1
					Vcam1	0.23494	1.62326e-07	1.544e-05
					Cnn3	0.189962	0.000615176	0.00895299
					F3	0.0283277	0.0136049	0.0724677
					Abcd3	0.398686	0.0107752	0.0632568
					Gm31243	0.230668	0.0136654	0.0725003
					Bank1	0.371191	0.0119683	0.0673344
					Tspan5	0.307558	0.0229661	0.1
					Gbp5	0.134557	5.02364e-05	0.00152039
					Gbp7	0.293578	0.000412031	0.00675993
					Gbp2b	0.134557	0.00307598	0.0277549
					Gbp2	0.183785	9.22217e-05	0.0023846
					Prkacb	0.318387	1.4694e-05	0.000602069
					Ifi44	0.464832	0.0155368	0.0779425
					Zzz3	0.387523	0.0181932	0.086628
					Trp53inp1	0	9.38818e-06	0.000419054
					Dpy19l4	0.253283	0.00812494	0.0521844
					Gem	0.225304	0.00215412	0.0218664
					Pdp1	0.195719	0.0228072	0.1
					Cpne3	0.448522	0.00183716	0.0195456
					Wwp1	0.229245	1.57009e-09	3.05972e-07
					Smim8	0.391437	0.0255802	0.1
					B4galt1	0.430581	6.05895e-06	0.000298829
					Tpm2	0	0.00126388	0.0148286
					Rnf38	0.179409	0.00121017	0.0143246
					Nr4a3	0.158302	0.00225673	0.022567
					Abca1	0.205792	2.02032e-11	6.20851e-09
					Ugcg	0.472589	0.000382176	0.00640157
					Trim32	0.179409	0.014007	0.0732338
					Frem1	0	0.0251373	0.1
					Ifnb1	0.0604749	0.00330707	0.0289727
					Klhl9	0.408779	1.9232e-05	0.000737153
					Tusc1	0.253283	0.0146147	0.074886
					Atg4c	0.269113	0.00901663	0.0555879
					Plpp3	0.124206	0.00602484	0.0437617
					Lrrc42	0.189962	0.00325904	0.0287987
					Zcchc11	0.384447	0.000339523	0.00594902
					Eps15	0.436031	0.000129792	0.00302275
					Rnf11	0.494586	0.0143072	0.0739893
					Mast2	0.287054	0.0262037	0.1
					Prdx1	0.448773	1.21461e-05	0.000524572
					Eif2b3	0.316604	0.00202836	0.0209385
					Gm12840	0.435707	0.0210443	0.0962431
					Ipo13	0.358818	0.0138876	0.0732338
					Foxj3	0.40367	0.0124495	0.0687422
					Cited4	0.215291	0.0232945	0.1
					Eva1b	0.228338	6.44293e-07	4.9027e-05
					Ago1	0.269113	0.000937119	0.0117728
					Phc2	0.274839	4.35397e-05	0.00138597
					Rnf19b	0.434053	0.000843889	0.0110898
					Marcksl1	0.443434	4.58037e-06	0.000236108
					Eya3	0.388719	0.00653976	0.0462973
					Zdhhc18	0.234011	4.20735e-06	0.000219741
					Clic4	0.4174	1.96292e-06	0.000116175
					Id3	0.414924	0.000767975	0.0103825
					2810405F17Rik	0	0.0251373	0.1
					Pla2g2d	0	0.0207073	0.0951949
					Nbl1	0	0.00587611	0.042994
					Mfap2	0.0468023	0.00449967	0.0365235
					Zbtb17	0.438555	0.0159755	0.0794785
					Plekhm2	0.293578	0.000167091	0.00360821
					Vps13d	0.434053	0.00303645	0.0276005
					Rere	0.40367	0.00221164	0.0223116
					Per3	0.276802	0.00238692	0.0234139
					Ski	0.463988	0.00241677	0.0235772
					Mxra8	0.0633207	0.00474659	0.0377361
					Agrn	0	0.0112121	0.0646713
					Isg15	0.0735059	4.45895e-08	5.0895e-06
					AW011738	0	0.014097	0.0732338
					Samd11	0	0.00796898	0.0517653
					Mterf1a	0.107645	0.00715109	0.0489182
					Gtpbp10	0.134557	0.0214528	0.0971136
					Hgf	0	0.00453068	0.0366023
					Fgl2	0.390814	0.0113089	0.0650052
					5031425E22Rik	0.276802	0.00027654	0.00518578
					Srpk2	0.424057	0.000623036	0.00899428
					Fam126a	0.422892	0.0131531	0.0710562
					Agap3	0.228338	6.46534e-05	0.00184491
					Depdc5	0.253283	0.00559056	0.0415516
					Mxd4	0.487992	0.000856357	0.0112167
					Fam193a	0.221623	0.00017064	0.00364544
					Cpeb2	0.48614	0.0249871	0.1
					Lcorl	0.334071	0.00410163	0.0343178
					Sepsecs	0.269113	0.0243043	0.1
					Arap2	0.165608	0.00855331	0.0539642
					Gm42726	0.301407	0.00439392	0.0358523
					Rbm47	0.498844	0.000863707	0.011276
					Pdgfra	0.0538226	0.018716	0.0885874
					Igfbp7	0.0626079	0.00184567	0.019584
					Uba6	0.322936	0.00278886	0.0260562
					Ythdc1	0.432801	8.9913e-06	0.000412871
					Rufy3	0.283277	0.000117395	0.00280831
					Pf4	0.485993	0.000468982	0.00726186
					Cxcl2	0.365212	1.80577e-06	0.000107671
					Cxcl9	0.0963987	0.0214882	0.097219
					Cxcl10	0.147923	1.89828e-05	0.000732708
					2023-09-11	0.450946	0.00062252	0.00899428
					Bmp2k	0.469223	0.0004022	0.00667228
					Wdfy3	0.469725	0.00208804	0.0214162
					Aff1	0.344465	0.0101782	0.0604628
					Gbp9	0.430581	0.00864494	0.0542571
					Gbp4	0.253283	0.0100153	0.0598063
					Lrrc8d	0.405876	0.000356884	0.00606203
					Evi5	0.269113	0.00180506	0.0193941
					Pcgf3	0.358818	0.0187444	0.0885874
					Ttc28	0.339932	0.0206274	0.0949917
					Ssh1	0.342508	0.0116442	0.066321
					Trpv4	0.287054	0.0199854	0.0927425
					Oasl2	0.389355	0.00075292	0.0102248
					Oasl1	0.0666829	1.25679e-05	0.000534131
					Med13l	0.204155	1.3796e-06	8.47911e-05
					Oas2	0.248412	0.0149391	0.0760264
					Oas3	0.0489297	0.000534798	0.00806222
					Oas1a	0.45211	0.00598097	0.0435619
					Atxn2	0.296024	0.000303381	0.00548289
					Fam109a	0.134557	0.0214528	0.0971136
					Setd1b	0.469223	0.00764671	0.0506184
					Hcar2	0.312171	0.00451232	0.0365235
					Rilpl2	0.40548	1.57047e-05	0.000636949
					Sfswap	0.465493	0.00897188	0.0555879
					Clip2	0.299015	0.0116624	0.066321
					Hip1	0.499782	0.0042183	0.0349624
					Ccl24	0.0593087	0.000351165	0.00603391
					Prkrip1	0.396588	0.00020623	0.00418212
					Pcolce	0	0.00258669	0.0247217
					Snx8	0.464352	0.00269968	0.0255268
					Ttyh3	0.384447	3.07366e-05	0.001054
					Cpsf4	0.381967	0.00432031	0.0355497
					Pan3	0.317416	1.09418e-06	7.23912e-05
					Pds5b	0.316604	0.0179516	0.0858356
					Samd9l	0.175747	1.24287e-05	0.000533893
					Col1a2	0	0.00296599	0.0272469
					Ppp1r9a	0.119606	0.00180325	0.0193941
					Sdhaf3	0.287054	0.0144445	0.0743619
					Tmem106b	0.302752	0.000753756	0.0102248
					Tfec	0.205039	0.00591049	0.0431665
					Tes	0.40367	0.0031625	0.0282957
					Cped1	0	0.000425861	0.00690179
					Zfp800	0.464832	0.00691145	0.0479913
					Hilpda	0.335914	0.000154471	0.00341936
					Cald1	0.192224	0.0106487	0.0627448
					Zc3hav1	0.477295	0.000130143	0.00302275
					Hipk2	0.344465	0.0083947	0.053317
					Rarres2	0.0326198	0.00719452	0.0490449
					Gpnmb	0.294854	0.00212057	0.0216387
					Nt5c3	0.463988	0.0124581	0.0687422
					Herc6	0.197716	0.000103358	0.00259487
					Abcg2	0.269113	0.00901663	0.0555879
					Hpgds	0.453243	5.58113e-06	0.000276973
					Gadd45a	0.276013	0.00654254	0.0462973
					Rmnd5a	0.248412	8.82257e-05	0.00231159
					Kdm3a	0.374418	0.0120478	0.0676462
					Vamp5	0.307558	0.00797707	0.0517758
					Kcmf1	0.489297	0.00538912	0.0406556
					Tet3	0.312015	1.28912e-06	7.98443e-05
					Plxna1	0.318949	0.0024035	0.0235283
					Vmn1r43	0	0.014097	0.0732338
					Iqsec1	0.307558	0.000160748	0.00350918
					Mitf	0.282569	2.26173e-07	2.0401e-05
					Bhlhe40	0.344246	8.24883e-06	0.00038769
					Gt(ROSA)26Sor	0.384447	0.0015485	0.0173525
					Irak2	0.427987	0.00017584	0.00371212
					Tatdn2	0.424915	0.00678036	0.0473967
					Plxnd1	0.272206	2.14823e-08	2.90918e-06
					Kdm5a	0.498358	0.00668969	0.0469863
					Usp18	0.195719	0.00415009	0.0345743
					Foxj2	0.287054	0.0144445	0.0743619
					Clec4n	0.160542	5.01679e-11	1.29302e-08
					Clec4d	0.191782	1.54485e-10	3.74036e-08
					Clec4e	0.419292	1.96656e-05	0.000741161
					C1s1	0	0.0251373	0.1
					Cd4	0	2.82138e-06	0.000159525
					Gm10069	0	0.0251373	0.1
					Olr1	0.189962	0.000890832	0.0115359
					Etv6	0.389355	0.0029822	0.0272938
					Lrp6	0.293578	0.000147608	0.0033216
					Emp1	0.466271	0.000234359	0.00461208
					Mgp	0.0959512	0.00686034	0.0477468
					Bcat1	0	0.0251373	0.1
					Etfrf1	0.234011	0.00238831	0.0234139
					Bhlhe41	0.245268	0.000311223	0.00555517
					Itpr2	0.478423	0.0165296	0.081074
					Ppfibp1	0.107645	0.0133906	0.0717086
					Klhl42	0.0978593	0.0041345	0.0345546
					Ipo8	0.293578	0.00585108	0.0429683
					Rdh13	0.107645	0.00715109	0.0489182
					Zfp865	0.215291	0.00554445	0.0414015
					Zfp606	0	0.00258669	0.0247217
					Zfp329	0.376758	0.020728	0.0952357
					Zc3h4	0.172232	0.000605474	0.00886022
					Dact3	0	0.014097	0.0732338
					Fosb	0.459075	0.0154648	0.0777612
					Trappc6a	0.49806	0.00102905	0.0127275
					Apoc4	0	0.0194164	0.090616
					Plaur	0.493195	0.000674474	0.00950436
					Cic	0.454502	0.00587288	0.042994
					Sertad1	0.232747	0.000792874	0.0106649
					Zfp74	0.248412	0.0149391	0.0760264
					Zfp260	0.470948	0.0178093	0.0855133
					Cd22	0.179409	0.0030503	0.0276744
					Fxyd1	0.0566554	0.00201651	0.020843
					Plekhf1	0.215291	0.0242337	0.1
					2410002F23Rik	0.430581	0.0222451	0.099572
					Atf5	0.179409	0.00860975	0.0541137
					Prr12	0.283277	0.00538114	0.0406378
					Rcn3	0.27908	0.0164442	0.081074
					Dbp	0.273385	4.64642e-05	0.00143893
					Spty2d1	0.463988	0.00180794	0.0193941
					Nav2	0.407306	0.00753013	0.0501888
					Tubgcp5	0.492093	0.0216746	0.097675
					Chsy1	0.391437	0.021578	0.0974609
					Arrdc4	0.409052	0.000904393	0.0115599
					Nr2f2	0.0742381	0.0005485	0.00820926
					Mfge8	0.230668	0.00221558	0.0223232
					Abhd2	0.260432	2.92811e-05	0.00101278
					Anpep	0.247055	0.000354307	0.00603598
					2900076A07Rik	0	0.0251373	0.1
					Picalm	0.434293	1.49284e-11	5.05367e-09
					Tmem126b	0.430581	0.0132532	0.0714999
					Gab2	0.376758	0.0165109	0.081074
					Lrrc32	0.0897044	0.00472793	0.0376491
					Serpinh1	0.082804	0.0203061	0.0938911
					Arrb1	0.486967	0.0063463	0.0455582
					Pgm2l1	0.126641	0.000616791	0.00896018
					Fchsd2	0.374418	0.0124459	0.0687422
					Il18bp	0.287054	0.00149854	0.0169927
					Trim12c	0.107645	0.0133906	0.0717086
					Trim30c	0.0897044	0.0170965	0.0829888
					Trim30a	0.417834	2.21461e-06	0.000129157
					Trim30d	0.250338	0.000185347	0.0038666
					Sbf2	0.307558	0.000160748	0.00350918
					Ampd3	0.230668	0.0136654	0.0725003
					Mrvi1	0	0.0251373	0.1
					Usp47	0.374418	0.000632168	0.00906815
					Spon1	0	0.0215965	0.0974878
					Smg1	0.478423	0.00637777	0.045661
					Gde1	0.474906	0.00326597	0.0288021
					Lyrm1	0	0.00796898	0.0517653
					Eef2k	0.313965	0.00517753	0.0395145
					Usp31	0.0672783	0.00106563	0.0130657
					Chp2	0	0.0251373	0.1
					Xpo6	0.465493	0.010217	0.0605586
					Hirip3	0.410077	0.0261653	0.1
					Zfp771	0.269113	0.000350977	0.00603391
					Fbrs	0.411585	0.00307439	0.0277549
					Dock1	0.20701	0.00028811	0.00529189
					Ifitm1	0.110405	0.00169159	0.0185655
					Phrf1	0.441622	0.00702566	0.0485171
					Irf7	0.368018	0.000288836	0.00529306
					Cracr2b	0.230668	0.00173097	0.0189456
					Ppfia1	0.40367	0.0256691	0.1
					Gm21781	0	0.014097	0.0732338
					Esr1	0.134557	0.0214528	0.0971136
					Lats1	0.339932	0.025137	0.1
					Sash1	0.449861	0.000716996	0.0099457
					Aig1	0.297306	1.95815e-05	0.000741161
					Heca	0.215291	0.00291644	0.0268766
					Tnfaip3	0.441346	5.20624e-05	0.00154637
					Sgk1	0.431997	0.00326156	0.0287987
					Tcf21	0.0448522	0.00228435	0.0227011
					Epb41l2	0.41342	7.92101e-08	8.6696e-06
					Cenpw	0.201835	0.00772047	0.0508911
					Zufsp	0.38685	0.000450856	0.00714512
					Fam26f	0.275372	2.65755e-05	0.000947927
					Cd164	0.472589	0.000176339	0.00371212
					Cd24a	0.143527	1.62938e-05	0.000657502
					Prdm1	0.40666	0.00754807	0.0502569
					Ascc3	0.481994	0.00049165	0.0075543
					Pkib	0.393319	0.000503991	0.0076995
					2023-09-10	0.269113	0.0127932	0.0699152
					Slc29a3	0.433794	0.000415998	0.0067971
					Sirt1	0.161468	0.00043057	0.00694991
					Reep3	0.461337	4.20786e-06	0.000219741
					Egr2	0.307558	0.000748962	0.0102248
					Arid5b	0.469517	0.000725081	0.0100404
					Ggt5	0.293578	0.0118423	0.0669628
					Cabin1	0.411585	0.00376705	0.0321907
					Mmp11	0	0.00542258	0.0407965
					Chchd10	0.127715	0.00186666	0.0196501
					Col6a2	0	0.0233278	0.1
					Col6a1	0.0326198	0.00848662	0.0538152
					Cstb	0.448629	1.45094e-11	5.05367e-09
					Mex3d	0.119606	0.0123789	0.0684943
					Dot1l	0.442114	0.00428129	0.0353744
					Gadd45b	0.318121	2.10815e-07	1.94631e-05
					Mfsd12	0.339932	0.000108245	0.00266935
					Gna11	0.410077	0.0261653	0.1
					Tdg	0.378213	0.00420487	0.0348873
					Chst11	0.138007	1.94629e-05	0.000740506
					Washc4	0.49806	0.0015153	0.0171246
					Igf1	0.154885	1.69077e-09	3.21644e-07
					Gas2l3	0.4364	0.013107	0.0708547
					Uhrf1bp1l	0.234011	0.00238831	0.0234139
					Hal	0.353339	0.000157785	0.00348256
					Plxnc1	0.387523	0.0126518	0.0694752
					Dcn	0.125412	0.0225469	0.1
					Lum	0.052255	0.00264403	0.0251196
					4930430F08Rik	0.269113	0.0243043	0.1
					Mettl25	0.107645	0.0133906	0.0717086
					Osbpl8	0.475905	0.000522814	0.0079415
					Rab21	0.48004	0.000626033	0.0090125
					Ifng	0	0.0251373	0.1
					Dyrk2	0.456677	0.0167927	0.082213
					Rassf3	0.493374	0.00810102	0.0521565
					Mon2	0.40367	0.00771196	0.0508911
					Ctdsp2	0.475642	0.00454149	0.0366525
					Ddit3	0.329881	0.000832017	0.0110284
					Stat2	0.377703	0.000379839	0.00638676
					Tmem198b	0.119606	0.0123789	0.0684943
					Cd63	0.488862	2.4874e-08	3.15462e-06
					Insr	0.299015	0.00853385	0.0539642
					Col4a1	0.10502	0.00455563	0.0366556
					Col4a2	0.165608	0.0249766	0.1
					F10	0.150387	5.58348e-10	1.17398e-07
					Tmco3	0.327616	0.00607324	0.0439534
					Gas6	0.177138	1.51654e-06	9.24961e-05
					Kbtbd11	0.0897044	0.0121494	0.0679905
					Gm15056	0.0186399	0.000185838	0.00386674
					Kat6a	0.465493	0.010217	0.0605586
					Ddhd2	0.453243	0.0135278	0.0721536
					Bag4	0.287054	0.0144445	0.0743619
					Rab11fip1	0.365994	0.00186299	0.0196501
					Nrg1	0.153779	0.0101393	0.0602766
					Ppp2cb	0	0.014097	0.0732338
					Dusp4	0	0.014097	0.0732338
					Tnks	0.358818	0.0100641	0.0599189
					Slc7a2	0.0861162	0.000224316	0.0044473
					Tlr3	0.195719	0.0228072	0.1
					Wwc2	0.228338	0.000263203	0.00498333
					Sh3rf1	0	0.00796898	0.0517653
					Ddx60	0.301407	0.00819527	0.0524254
					Psd3	0.289814	0.00581322	0.0428874
					Rfxank	0.269113	0.00424825	0.0351377
					Ell	0.299015	0.0116624	0.066321
					Gtpbp3	0.269113	0.0127932	0.0699152
					Slc27a1	0.333188	0.000869716	0.011336
					Zfp617	0.376758	0.0165109	0.081074
					Arhgap10	0.40367	0.00238226	0.0234139
					Rbmxl1	0.307558	0.000160748	0.00350918
					Gab1	0.256298	0.0030515	0.0276744
					Il15	0.251172	0.0022623	0.0225944
					Rnf150	0.269113	0.0220534	0.0990469
					Tbc1d9	0.496824	0.00517669	0.0395145
					Adgrl1	0	0.014097	0.0732338
					Gm26532	0.327616	0.00607324	0.0439534
					Cacna1a	0.201835	3.1748e-06	0.000176155
					Tnpo2	0.312518	0.00119624	0.0142018
					4921524J17Rik	0.446334	0.00450419	0.0365235
					Lonp2	0.348264	0.00166363	0.0183594
					Cyld	0.315059	0.000987588	0.0123293
					Mmp2	0.0897044	0.0079958	0.0518552
					Mt2	0.0283277	0.00188599	0.0198014
					Nlrc5	0.391437	0.0112784	0.0648765
					Zfp319	0.215291	0.0242337	0.1
					Gm10073	0.27652	4.25326e-09	7.23044e-07
					Zfhx3	0.436031	0.000252536	0.00489741
					Gm6793	0.376758	0.0165109	0.081074
					Maf	0.395081	1.86336e-10	4.37885e-08
					Piezo1	0.299015	5.61612e-05	0.00164971
					Irf2bp2	0.312781	3.07603e-16	2.04809e-13
					Nrp1	0.352111	6.18351e-06	0.000303102
					Dnase1l3	0.0996715	1.02203e-06	6.97943e-05
					Zswim8	0.241653	3.4511e-06	0.000188862
					Plau	0.412258	0.0243137	0.1
					Kat6b	0.143527	0.00314365	0.0281586
					Samd8	0.320026	0.00119159	0.0141677
					Comtd1	0.417728	0.000906474	0.0115599
					Zcchc24	0.307558	0.0229661	0.1
					Rft1	0.316604	0.0179516	0.0858356
					Glt8d1	0.394699	0.00518151	0.0395145
					Pbrm1	0.499385	0.00026033	0.00496423
					Stab1	0.325499	2.47911e-14	1.41484e-11
					Ncoa4	0.451416	9.63648e-05	0.00247571
					Ddhd1	0.384447	0.0017766	0.0192603
					Gmfb	0.436821	0.000429734	0.00694991
					Tmem260	0.384447	0.00740363	0.0498169
					Exoc5	0.344465	1.92825e-05	0.000737153
					Ndrg2	0.0538226	0.000922997	0.0116872
					Mmp14	0.474906	0.000364739	0.00617422
					Pspc1	0.481571	0.0178481	0.0855969
					Lats2	0.393824	0.00128001	0.0149958
					Setdb2	0.165608	0.0180452	0.0862229
					Wdfy2	0.481571	0.00912927	0.056239
					Kif13b	0.307558	0.00256101	0.0245645
					Zfp395	0.430581	0.0258094	0.1
					Slc25a37	0.320026	0.000383006	0.00640205
					R3hcc1	0.082804	0.00485871	0.0381342
					Bmp1	0	0.0112121	0.0646713
					Fndc3a	0.496824	0.00451087	0.0365235
					Tsc22d1	0.322016	0.000278439	0.00518578
					Akap11	0.215291	0.0242337	0.1
					Rgcc	0.316604	0.012774	0.0699152
					Kctd12	0.493374	1.71926e-05	0.000677871
					Acod1	0.0628855	9.77376e-09	1.47342e-06
					Cln5	0.489297	0.00471571	0.0376404
					Ednrb	0.082804	0.0241788	0.1
					Rbm26	0.480968	0.00668498	0.0469863
					Uggt2	0	0.0251373	0.1
					Rap2a	0.430581	0.000737643	0.0101957
					Casp12	0	0.0194164	0.090616
					Birc2	0.376758	0.00151368	0.0171246
					Amotl1	0	0.0251373	0.1
					Ankrd49	0.381244	0.00113431	0.0136492
					Zfp560	0.430581	0.0129618	0.0704076
					Keap1	0.472589	0.0071187	0.0489182
					Tmem205	0.493374	0.0116814	0.066382
					Epor	0.134557	0.0214528	0.0971136
					Acp5	0.449167	0.0188002	0.0886487
					Clmp	0.27908	0.00398872	0.033621
					Arhgef12	0.159474	0.000347276	0.00599288
					Bcl9l	0.134557	0.0214528	0.0971136
					Kmt2a	0.378213	0.0021593	0.0218664
					Dmxl2	0.195719	0.00166298	0.0183594
					Ireb2	0.316604	0.00113002	0.0136386
					Tspan3	0.476463	0.00657449	0.0463632
					1700017B05Rik	0.36826	0.00213544	0.0217349
					Scamp5	0.165608	0.00510688	0.0393013
					Islr	0	0.0159448	0.0794249
					Arih1	0.448522	0.000310802	0.00555517
					Myo9a	0.394699	0.00914415	0.0562728
					Fem1b	0.338314	0.00342127	0.0296803
					Gm48855	0.201835	0.00528688	0.0401607
					Dpp8	0.336391	0.00016057	0.00350918
					Zfp609	0.269113	0.0243043	0.1
					Dapk2	0.107645	0.0133906	0.0717086
					Tpm1	0.344021	0.000299243	0.00542159
					Nedd4	0.158302	0.000858384	0.0112249
					Myo5a	0.49017	6.66289e-05	0.0018745
					Mapk6	0.466463	0.00259081	0.0247315
					Mb21d1	0.430581	0.00963161	0.0584768
					Slc17a5	0.316604	0.0179516	0.0858356
					Cd109	0.119606	0.0224392	0.0999579
					Bcl2a1d	0.416912	1.22034e-07	1.20375e-05
					Gm26882	0.134557	0.00189402	0.0198336
					1190002N15Rik	0.307558	0.00680702	0.0474999
					Xrn1	0.34912	0.0014585	0.0167432
					Slc25a36	0.365994	0.000304278	0.00548289
					Rbp1	0.165608	0.00136143	0.0157192
					Mras	0	0.000281483	0.00519404
					Uba7	0.358818	0.000901323	0.0115599
					Nicn1	0.119606	0.0123789	0.0684943
					Arih2	0.344465	0.0121279	0.0679862
					Elp6	0.179409	0.00860975	0.0541137
					Clasp2	0.358818	0.000253324	0.00490081
					Ubp1	0.470948	0.01562	0.0781477
					Bcl2a1c	0.253283	0.00812494	0.0521844
					Csrnp1	0.390814	0.000458666	0.00721397
					Patz1	0.119606	0.0123789	0.0684943
					Tug1	0.27313	2.82334e-07	2.42561e-05
					Slc35e4	0.438555	0.0187488	0.0885874
					Osm	0.449132	0.00161534	0.0179256
					Mtmr3	0.422892	0.0153987	0.0776238
					Purb	0.365994	1.43402e-07	1.38044e-05
					Tns3	0.358818	3.93283e-05	0.00126705
					Upp1	0.041402	0.00110031	0.0133607
					Cnrip1	0.113311	0.00111823	0.0135371
					Gm16141	0	0.0251373	0.1
					Peli1	0.481238	0.000192437	0.003973
					Vps54	0.372618	0.00865137	0.0542571
					Sptbn1	0.383144	0.000588146	0.00863828
					Psme4	0.372618	0.00700109	0.0483892
					Cpeb4	0.159474	0.000104174	0.00260107
					Sh3pxd2b	0.220183	9.54429e-06	0.000423655
					Gm12166	0.325439	9.38984e-05	0.00242012
					Irgm1	0.201835	1.45411e-05	0.000598876
					Tgtp1	0	0.00126388	0.0148286
					Ifi47	0.291539	0.000129852	0.00302275
					Cnot6	0.40666	0.000749815	0.0102248
					Ltc4s	0.235474	0.00306162	0.0277347
					Irf1	0.475642	0.0121339	0.0679862
					Fnip1	0.326198	1.07965e-05	0.000473974
					Gpx3	0.283277	6.55331e-05	0.00185675
					Tnip1	0.48614	0.00433376	0.0355777
					Sparc	0.0156575	0.0141617	0.0734712
					Sap30l	0.334071	0.00154669	0.0173525
					2810021J22Rik	0.119606	0.0123789	0.0684943
					Iba57	0.0978593	0.00796695	0.0517653
					Tom1l2	0	0.014097	0.0732338
					Alkbh5	0.428266	0.000109344	0.00268815
					Smcr8	0.153779	0.00302096	0.0274911
					Ulk2	0.316604	0.000665658	0.00943974
					Vamp2	0.492093	0.0154749	0.0777626
					Fxr2	0.358818	0.0260334	0.1
					Tnfsf12	0.324233	7.18869e-06	0.000346005
					Clec10a	0.401389	0.00117904	0.0140603
					Xaf1	0.453243	0.000529523	0.00801294
					Ankfy1	0.489297	0.00201045	0.0208074
					Zzef1	0.303615	0.000280474	0.00519404
					Slc43a2	0.470948	0.000134081	0.00309623
					Git1	0.299015	0.00853385	0.0539642
					Taok1	0.32678	3.86576e-05	0.00125049
					Rab34	0.299015	0.02358	0.1
					Suz12	0.420079	0.00309049	0.0278384
					Ccl2	0.374724	0.00185843	0.0196411
					Ccl12	0.412155	0.00925786	0.0567685
					Ccl8	0.0347243	0.00261837	0.0249648
					Gm11423	0	0.0251373	0.1
					Slfn5	0.430581	2.23212e-05	0.000823365
					Slfn1	0.237453	2.264e-05	0.000829777
					Slfn4	0.0496824	0.000194603	0.00400738
					Ccl5	0.261016	0.000907809	0.0115599
					Ccl4	0.455004	0.000464288	0.00723121
					Wfdc17	0.410307	3.74448e-10	8.31055e-08
					Bcas3	0	0.000488948	0.00752725
					Med13	0.470948	0.0116224	0.0662824
					Cltc	0.409405	1.1216e-12	4.9786e-10
					Ypel2	0.134557	0.0214528	0.0971136
					Gdpd1	0.269113	0.0127932	0.0699152
					2023-09-04	0.179409	0.0183574	0.0873057
					Mtmr4	0.153779	0.00302096	0.0274911
					Mir142hg	0.134557	0.0214528	0.0971136
					Gm11508	0	0.0251373	0.1
					Trim25	0.391437	4.59751e-05	0.00142932
					Mbtd1	0.400541	0.00242478	0.0235977
					Col1a1	0.0751013	0.0101248	0.0602357
					Npepps	0.358818	0.000139796	0.00320427
					Mllt6	0.358818	0.00114377	0.0137217
					Med1	0.371865	0.000344276	0.00599288
					Igfbp4	0.390571	2.70375e-06	0.000155415
					Cavin1	0.0978593	0.0130983	0.0708547
					Hexim1	0.465493	0.00780776	0.051302
					Plekhm1	0.161468	0.000740988	0.0101957
					Cdc27	0.318949	0.00301283	0.0274797
					Itgb3	0	0.0112121	0.0646713
					Tlk2	0.41402	0.0155506	0.0779425
					Tanc2	0.445429	0.0212076	0.0968267
					Ern1	0.165608	0.00855331	0.0539642
					Helz	0.153779	0.000152114	0.0033949
					Ttyh2	0.244648	0.0110824	0.0645389
					Cd300lf	0.347878	2.18517e-09	4.06029e-07
					Trim47	0.481994	0.00274506	0.0258641
					Trim65	0.422892	0.0153987	0.0776238
					Sphk1	0	0.000623642	0.00899428
					Rhbdf2	0.374418	0.000632168	0.00906815
					Cygb	0.0448522	0.00282209	0.0262799
					St6galnac2	0.107645	0.00715109	0.0489182
					Sgsh	0.307558	0.00680702	0.0474999
					Rnf213	0.186585	4.34251e-08	5.02844e-06
					Cbr2	0.228338	0.00517072	0.0395145
					Foxk2	0.253283	0.0111453	0.0646713
					Fam208b	0.234011	0.00238831	0.0234139
					Asb13	0.410077	0.0261653	0.1
					Dip2c	0.0978593	0.0130983	0.0708547
					Lgals8	0.470948	0.000989242	0.0123306
					Nid1	0	0.0133476	0.0717086
					Inhba	0.0228338	0.00030979	0.00555517
					Cdk13	0.493374	0.00415074	0.0345743
					Gm32036	0.437309	0.0187338	0.0885874
					Aoah	0.215291	0.000466878	0.00724331
					Gm11273	0.269113	0.0171639	0.083164
					Hist1h4i	0.346003	0.00505916	0.0391255
					Hist1h4d	0.134557	0.0214528	0.0971136
					Hist1h2bc	0.129174	0.000953045	0.0119541
					Hist1h1c	0.395432	0.00276235	0.0259352
					Carmil1	0.0978593	0.000409074	0.00673909
					BC005537	0.401145	3.9021e-16	2.39826e-13
					Sox4	0.381967	0.0129678	0.0704076
					Serpinb6a	0.27652	3.20205e-07	2.66501e-05
					Psmg4	0.378752	2.88072e-07	2.44858e-05
					Pxdc1	0.322936	0.00278886	0.0260562
					Rreb1	0.444622	0.00134424	0.0155657
					Ranbp9	0.232747	3.53948e-05	0.0011686
					Ninj1	0.378345	5.1053e-10	1.10245e-07
					Ogn	0	0.0251373	0.1
					Rnf44	0.371191	0.00504631	0.0391071
					Hk3	0.355334	5.57909e-05	0.00164488
					Gkap1	0.346003	0.00869749	0.0542907
					Isca1	0.215291	0.000466878	0.00724331
					Dapk1	0.492093	0.0198422	0.0922264
					6720489N17Rik	0	0.0194164	0.090616
					Ctsl	0.473118	0.000260131	0.00496423
					Zfp748	0	0.0251373	0.1
					Papd7	0.455422	0.026487	0.1
					Ell2	0.358818	0.000551644	0.00823364
					Ttc37	0.339932	0.0244413	0.1
					Arrdc3	0.491424	0.0202056	0.0934806
					Rasa1	0.291539	3.37488e-05	0.00114258
					Serinc5	0	0.00796898	0.0517653
					Homer1	0.134557	0.00189402	0.0198336
					Jmy	0.239212	0.0123718	0.0684943
					Lhfpl2	0.391437	0.0179277	0.0858356
					Gm10260	0.414108	2.68457e-27	7.14982e-24
					Tmem171	0.153779	0.00804616	0.0519709
					Mast4	0.119606	0.0224392	0.0999579
					Erbin	0.453243	0.00214326	0.0217868
					Srek1ip1	0.48745	0.00269948	0.0255268
					Rhob	0.434721	4.83146e-06	0.000244322
					Pum2	0.485459	4.71093e-05	0.00144769
					Sdc1	0.27313	0.00221111	0.0223116
					E2f6	0.248412	0.0217439	0.0978771
					Kidins220	0.430581	0.022775	0.1
					Rnf144a	0	0.014097	0.0732338
					Rsad2	0.0214932	3.01109e-05	0.001037
					Cmpk2	0.041402	0.00224097	0.0224656
					Colec11	0	0.0112121	0.0646713
					Tmem18	0.215291	0.00554445	0.0414015
					Nampt	0.361621	1.1536e-06	7.40408e-05
					Gdap10	0.185595	0.000320899	0.00567246
					Etv1	0.230668	0.0136654	0.0725003
					Dock4	0.391437	0.000112821	0.00272335
					Pnpla8	0.464832	0.0122502	0.0683982
					G2e3	0.248412	0.0149391	0.0760264
					Cfl2	0.41862	0.00533494	0.0404418
					Fbxo33	0.387523	0.0181932	0.086628
					Sos2	0.256298	0.00750317	0.050125
					Atp5s	0	0.00796898	0.0517653
					Sav1	0.358818	0.00023921	0.00468447
					Slc38a6	0.358818	0.00890599	0.0553328
					Hif1a	0.354033	2.11296e-08	2.90918e-06
					Rhoj	0	0.0251373	0.1
					Actn1	0.290933	4.16715e-06	0.000219741
					Cox16	0.290933	0.000132898	0.00307781
					Pcnx	0.287054	0.000620291	0.00899428
					Zfp410	0.322936	0.00133871	0.0155281
					Jdp2	0.20027	0.000217605	0.00433577
					Tmed8	0	0.00375705	0.0321397
					Flrt2	0	0.0161649	0.0801216
					Tmem251	0.491424	0.000391174	0.00652493
					Serpina3f	0	0.00274344	0.0258641
					Serpina3g	0.140964	0.00803833	0.0519709
					Cinp	0.415902	0.00281908	0.0262799
					Tecpr2	0.215291	0.00554445	0.0414015
					Tnfaip2	0.425574	0.00215674	0.0218664
					Mark3	0.485459	0.00549044	0.041152
					Ahnak2	0.391437	0.00650223	0.0462208
					BC022687	0.215291	0.000987061	0.0123293
					Mta1	0.358818	0.010859	0.0634691
					Wdr60	0	0.014097	0.0732338
					Ncapg2	0.0672783	0.000574394	0.00848308
					Ccdc152	0.316604	0.0134331	0.0718884
					Ghr	0	0.014097	0.0732338
					2410089E03Rik	0.283277	0.00538114	0.0406378
					Lmbrd2	0.185595	0.000454176	0.00717158
					Il7r	0.140026	1.39672e-08	2.0666e-06
					Rai14	0.322936	0.00132971	0.0154647
					Mtmr12	0.169966	0.0012196	0.0144006
					Snhg18	0.119606	0.0224392	0.0999579
					Vps13b	0.331216	0.0071962	0.0490449
					Dcstamp	0.0331216	0.00105861	0.0130137
					Dpys	0	0.000172423	0.00367371
					9130401M01Rik	0.475642	0.0060449	0.0438675
					Mtss1	0.397459	0.00053209	0.00803657
					Washc5	0.424057	0.00654411	0.0462973
					Gm7125	0.107645	0.00715109	0.0489182
					Ly6a	0.153779	0.0115604	0.0660702
					Ly6c1	0.041402	0.00735163	0.0496104
					Ccdc166	0.107645	0.0133906	0.0717086
					Plec	0.224261	3.8336e-06	0.000205571
					Mroh1	0.358818	0.0072003	0.0490449
					Csf2rb2	0.287054	0.000238257	0.00467727
					Csf2rb	0.358818	5.50628e-07	4.31319e-05
					Tst	0	0.0112121	0.0646713
					Cdc42ep1	0	0.0251373	0.1
					Syngr1	0.441622	0.0114939	0.0659125
					Atf4	0.454502	2.11929e-07	1.94631e-05
					Zc3h7b	0.0768895	0.000801	0.0107235
					Tef	0.300405	0.000136992	0.00315433
					Cyp2d22	0	0.0112121	0.0646713
					Poldip3	0.461337	0.00590483	0.0431647
					Pim3	0.461337	0.00323439	0.028688
					1810021B22Rik	0	0.0251373	0.1
					Arsa	0.40831	0.00914885	0.0562728
					Twf1	0.472128	0.00398912	0.033621
					Vdr	0.0978593	0.0130983	0.0708547
					Senp1	0.239212	0.00344524	0.029759
					Ddx23	0.4364	0.00463896	0.0372047
					Kmt2d	0.339932	9.70307e-05	0.00248482
					Prpf40b	0	0.00796898	0.0517653
					Dip2b	0.316604	0.000665658	0.00943974
					Smagp	0.331216	9.0902e-05	0.00236088
					Galnt6	0.388719	0.00431385	0.0355497
					Csad	0.307558	0.0229661	0.1
					Sp1	0.441622	0.00455551	0.0366556
					Pde1b	0	0.014097	0.0732338
					Vasn	0	0.000904369	0.0115599
					Usp7	0.358818	0.00050604	0.00770135
					Marf1	0.383779	6.64803e-07	5.01105e-05
					Ppm1f	0	0.0194164	0.090616
					Dgcr2	0.381967	0.00432031	0.0355497
					Tango2	0.400541	0.00500213	0.0388779
					Klhl24	0.489297	0.000920702	0.0116767
					Abcc5	0.430581	0.00937999	0.0572975
					Rtp4	0.300405	5.1847e-08	5.7535e-06
					P3h2	0.119606	0.0123789	0.0684943
					Atp13a3	0.472589	0.00848328	0.0538152
					Acap2	0.381244	0.000614841	0.00895299
					Pigz	0.146789	0.00324105	0.0287091
					Fyttd1	0.441622	0.00476592	0.0378145
					Iqcg	0.0768895	0.00469625	0.0375601
					Heg1	0.253283	0.00812494	0.0521844
					Mylk	0	0.00796898	0.0517653
					Dirc2	0.234011	0.00410187	0.0343178
					Parp14	0.49242	0.000352468	0.00603598
					Dtx3l	0.484404	0.00996928	0.0596209
					Slc15a2	0.107645	0.0213453	0.0971136
					Fstl1	0	0.004364	0.0357471
					Lrrc58	0.482307	1.0633e-06	7.17519e-05
					Cd200r1	0.205039	3.81493e-05	0.00123906
					Ccdc80	0.0861162	0.00730052	0.0495164
					Dzip3	0.0717635	0.000463546	0.00723121
					Zfp654	0.248412	0.0149391	0.0760264
					Hspa13	0.388719	0.00311489	0.0280266
					Btg3	0	0.0251373	0.1
					D16Ertd472e	0.422892	0.0153987	0.0776238
					Mir155hg	0.387523	0.0128294	0.0700637
					Ltn1	0.307558	0.0229661	0.1
					Sod1	0.485716	0.000242786	0.00473131
					Itsn1	0.296414	4.14046e-06	0.000219741
					Runx1	0.499385	0.000239828	0.00468508
					Morc3	0.416691	3.43038e-05	0.00115125
					Ttc3	0.324967	8.12795e-05	0.00215752
					Mx1	0.215291	0.00972566	0.0585922
					Tulp4	0.348264	0.00211195	0.0215783
					Tmem181a	0.275372	5.13554e-05	0.0015368
					Dynlt1a	0.326198	0.0020633	0.0211896
					Tagap1	0.201835	0.00772047	0.0508911
					Igf2r	0.299015	0.0116624	0.066321
					Sod2	0.417761	2.27248e-07	2.0401e-05
					Lnpep	0.410077	6.24645e-07	4.7989e-05
					Tbc1d24	0.230668	0.0136654	0.0725003
					Pkd1	0.296952	0.000967441	0.0121156
					Tmem204	0	0.00796898	0.0517653
					Gm8225	0.143527	0.00498849	0.0388354
					Hmga1	0.107645	0.000424827	0.00690179
					D17Wsu92e	0.465927	0.00074906	0.0102248
					Anks1	0.226622	0.00459148	0.0368698
					Abcg1	0.390019	2.83515e-06	0.000159525
					Angptl4	0.358818	0.0162138	0.080203
					BC051226	0.201835	0.00528688	0.0401607
					Daxx	0.299772	0.0024127	0.0235663
					Tap1	0.447728	3.23565e-05	0.00110481
					Ddah2	0.215291	0.0156681	0.0783396
					Tnf	0.297001	2.2362e-05	0.000823365
					H2-Q6	0.298095	4.69536e-06	0.000240483
					H2-Q7	0.402049	3.37427e-07	2.75636e-05
					Ier3	0.32085	4.78684e-06	0.000243607
					H2-T23	0.417087	2.17623e-12	8.69391e-10
					F630040K05Rik	0.269113	0.00901663	0.0555879
					Vegfa	0.137003	5.09543e-07	4.03089e-05
					Bicral	0.119606	0.0123789	0.0684943
					Guca1a	0.0538226	6.79065e-05	0.00189047
					Pot1b	0.391437	0.0221674	0.0994471
					Mllt1	0.134557	0.0214528	0.0971136
					C3	0.364899	1.43761e-05	0.000598247
					Fbxl17	0.119606	0.0224392	0.0999579
					Man2a1	0.335289	1.72227e-05	0.000677871
					Rab31	0.344465	0.000202663	0.00413245
					Ptprm	0	0.014097	0.0732338
					Lpin2	0.381967	0.000115902	0.00278091
					Dpy30	0.49017	6.73922e-05	0.00188272
					Birc6	0.489297	0.000125642	0.0029756
					Heatr5b	0.134557	0.0214528	0.0971136
					Map4k3	0.307558	0.00888456	0.0552856
					Tmem178	0	0.0251373	0.1
					Eml4	0.389355	0.000345761	0.00599288
					Gm47283	0.31781	1.25112e-12	5.26122e-10
					Mib1	0.300405	0.000105779	0.00262474
					Npc1	0.371191	0.000103601	0.00259487
					Impact	0.430581	2.77925e-05	0.000982563
					Trappc8	0.443245	0.010735	0.0631137
					Zfp24	0.269113	0.0032947	0.0288961
					Gypc	0	0.0251373	0.1
					Epb41l4aos	0.327616	0.00458084	0.0368214
					Egr1	0.435864	0.00580747	0.0428845
					Hbegf	0.228338	0.0115261	0.0659686
					Taf7	0.224261	5.11866e-05	0.0015368
					Nr3c1	0.40367	1.36944e-05	0.000575877
					Slc12a2	0.287054	0.0144445	0.0743619
					Dctn4	0.493374	0.00055905	0.00828712
					Synpo	0	0.0251373	0.1
					Ndst1	0.134557	0.0214528	0.0971136
					Hmgxb3	0.283277	0.00751451	0.0501588
					Afap1l1	0	0.0251373	0.1
					Malt1	0.201377	2.21436e-08	2.94875e-06
					Gm17669	0.299015	0.0152443	0.0772354
					Tcf4	0.43493	4.55743e-05	0.00142437
					Smad4	0.283277	5.89142e-05	0.0017055
					Slc14a1	0	0.014097	0.0732338
					Pqlc1	0.287054	0.00183316	0.019529
					Nfatc1	0.450608	0.0119417	0.0672395
					Socs6	0.474906	0.0148964	0.0760264
					Ppp6r3	0.498358	0.0060721	0.0439534
					Lrp5	0.358818	0.010859	0.0634691
					Gstp1	0.221189	3.53648e-08	4.28123e-06
					Rbm4b	0.464832	0.00496576	0.038746
					Efemp2	0.153779	0.00804616	0.0519709
					Map3k11	0.478423	0.00433706	0.0355777
					Vegfb	0.239212	0.000906306	0.0115599
					Uqcc3	0.480559	2.82443e-05	0.000985421
					B3gat3	0.185595	0.000110093	0.00269664
					Fth1	0.486319	4.59333e-11	1.22334e-08
					Gm47242	0	0.0073491	0.0496104
					Gnaq	0.481571	0.00093167	0.0117412
					Vps13a	0.422892	0.0203307	0.0939345
					Prune2	0.410077	0.0261653	0.1
					Klf9	0.328916	0.0175351	0.0845015
					Gm6563	0.307558	0.0112395	0.0646992
					Gm10053	0.26184	5.77864e-05	0.00168426
					Smarca2	0.48745	0.00837254	0.0532186
					Jak2	0.326198	0.00292154	0.0268926
					Cd274	0.155164	9.33358e-06	0.000418957
					A930007I19Rik	0.285589	0.000318175	0.00564931
					Ric1	0.201835	1.38863e-05	0.000580889
					Ch25h	0.162483	0.0221237	0.099307
					Ifit2	0.101313	0.00276681	0.0259466
					Ifit3	0.124206	0.00058797	0.00863828
					Ifit1	0.0598029	0.000102785	0.00259067
					Pcgf5	0.227711	7.73633e-06	0.000365754
					Tnks2	0.454128	0.000654223	0.00931761
					Entpd1	0.365225	0.000278188	0.00518578
					Arhgap19	0.367569	0.00178774	0.0193025
					Pi4k2a	0.366452	0.000716625	0.0099457
					Entpd7	0.4364	0.0133017	0.0716649
					Slf2	0.358818	0.0010662	0.0130657
					Dusp5	0.487768	0.015109	0.0767448
					Tcf7l2	0.434053	0.000911345	0.0115764
					Rps12-ps3	0.46618	6.78527e-10	1.39009e-07
					Rab11fip2	0.396588	0.0248743	0.1
					mt-Co1	0.490099	6.21887e-40	4.96881e-36
					mt-Co3	0.485872	8.37618e-38	3.34624e-34

## Sheet: Dendritic
Up					Down
Name	FC	pVal	Qval		Name	FC	pVal	Qval
Mfsd6	5.28232	0.0149836	0.0389033		Vcpip1	0.441666	0.0153282	0.0394114
Ugt1a7c	Inf	0.0251524	0.0538829		Arfgef1	0.481579	0.0176876	0.0435057
Pdcd1	Inf	0.0453561	0.0772591		Tmem70	0.484977	0.00973463	0.0301166
Mgat5	3.65699	0.01966	0.0466473		Lmbrd1	0.406332	0.000500829	0.00371095
Lax1	Inf	0.000163609	0.00157701		Ptp4a1	0.443611	0.00530032	0.0200897
A830008E24Rik	Inf	0.0251524	0.0538829		Fam168b	0.46303	0.00211877	0.0108778
Mr1	Inf	0.0453561	0.0772591		Txndc9	0.377717	4.5303e-06	9.03099e-05
Cd84	2.03166	0.016167	0.0408624		Rnf149	0.406332	0.0238474	0.0528846
Cadm3	5.68865	0.0229497	0.0518943		Map4k4	0.398666	0.00613774	0.0222377
Rbm8a2	Inf	0.0251524	0.0538829		Stat1	0.42157	0.0129385	0.0357563
Hsd11b1	4.46966	0.0375203	0.0707965		Hspd1	0.482819	0.00132994	0.00779376
Cd34	5.28232	0.0207608	0.0483207		Clk1	0.477342	4.23977e-06	8.63243e-05
Gata3	2.2574	0.00741638	0.025384		Cflar	0.41944	0.0015325	0.00852124
Il2ra	Inf	0.00454117	0.0178809		Cyp20a1	0.445031	0.0284131	0.0585514
Itga8	Inf	0.007982	0.0263909		Abi2	0.243799	0.0331121	0.0649748
Gpsm1	Inf	0.0123654	0.0346959		Ndufs1	0.490985	0.0271351	0.0567774
Fam102a	5.28232	0.000964588	0.00607893		Pikfyve	0.380937	0.0176272	0.0433795
Sh2d3c	2.09938	0.0458544	0.0778574		Mreg	0.0213859	0.00882707	0.0283202
Lrsam1	Inf	0.014112	0.0374777		Dnpep	0.340795	0.00113407	0.00695387
Garnl3	Inf	0.014112	0.0374777		Agfg1	0.278017	0.00183233	0.00968917
Phf19	Inf	0.0453561	0.0772591		Trip12	0.496629	0.0063525	0.0227391
Ptgs1	Inf	0.0453561	0.0772591		Sp110	0.0312563	9.11083e-06	0.000155582
Cobll1	Inf	0.0453561	0.0772591		Sp140	0.266218	0.000441693	0.00341069
Map3k20	Inf	0.00259473	0.0126275		A630001G21Rik	0.365699	0.00653155	0.0231539
Gm10800	2.43799	0.00789761	0.0263909		Cab39	0.379244	0.00240129	0.0119049
Ttbk2	Inf	0.00259473	0.0126275		Arl4c	0.466213	0.0111848	0.0326124
Frmd5	Inf	0.0453561	0.0772591		Asb1	0	0.0248611	0.0538829
Ncaph	Inf	0.0453561	0.0772591		Gpr35	0.455885	0.00226068	0.0113257
Kiz	4.46966	0.00300509	0.0137668		St8sia4	0.463219	0.000122311	0.00123461
Ahcy	Inf	0.014112	0.0374777		D1Ertd622e	0.280739	1.1306e-05	0.000183843
Dsn1	Inf	0.0251524	0.0538829		Tnfrsf11a	0.33861	0.012738	0.0353909
Actr5	2.70888	0.0491942	0.081751		Ddx18	0.475202	0.00053067	0.00387779
Dhx35	Inf	0.014112	0.0374777		Slc35f5	0.203166	0.00629384	0.022597
Ada	Inf	0.0037667	0.0158254		Ubxn4	0.481734	0.00033645	0.00276853
Neurl2	Inf	0.00454117	0.0178809		Rassf5	0.496104	0.000272422	0.00235451
Gm11464	Inf	0.0453561	0.0772591		Srgap2	0.445031	0.0293224	0.0597022
Gm20721	3.45383	0.0236568	0.0528737		Dstyk	0.295515	0.0368925	0.0701677
Gm6710	Inf	0.0453561	0.0772591		Ppp1r15b	0.421961	0.00683371	0.0238698
Ids	2.74274	0.0165822	0.0415513		Ppfia4	0.0427718	5.18791e-05	0.000655806
Slc16a2	Inf	0.0453561	0.0772591		Timm17a	0.438839	0.000280669	0.00241375
Sirpb1b	13.409	4.06305e-05	0.00053623		Rgs2	0.483152	0.0435161	0.0771307
Tnik	6.09499	0.0116098	0.0334019		Rgs1	0.288754	0.000109118	0.00113898
Eif5a2	Inf	0.0251524	0.0538829		Rnf2	0.446966	0.0289915	0.0592548
Pfn2	Inf	0.0453561	0.0772591		Dhx9	0.448367	0.0078828	0.0263909
Cd160	Inf	0.00454117	0.0178809		Ier5	0.39765	0.000123445	0.00123819
Negr1	Inf	0.0251524	0.0538829		Xpr1	0.480211	0.0370291	0.0703432
Gm11837	5.07916	0.00303991	0.0138596		Tor1aip2	0.373387	0.00190268	0.00993978
Nol6	4.46966	0.0375203	0.0707965		Soat1	0.429332	0.000251194	0.00218391
Arhgef39	Inf	0.0453561	0.0772591		Cacybp	0.493404	0.000114382	0.00117196
A230083N12Rik	Inf	0.0453561	0.0772591		Prrc2c	0.359586	1.30318e-08	6.08711e-07
Pomgnt1	3.25066	0.0348311	0.067213		Sell	0.367634	0.000955132	0.0060273
Tmem39b	4.87599	0.0321297	0.0635972		Pogk	0.0812665	0.042227	0.0759191
Sytl1	4.46966	0.0375203	0.0707965		Atf6	0.406332	0.024819	0.0538829
Gm13012	3.65699	0.01966	0.0466473		Fcgr2b	0.438259	0.000373951	0.00300954
Angptl7	Inf	0.014112	0.0374777		Nit1	0.441666	0.0342846	0.0665906
Spsb1	Inf	0.0453561	0.0772591		B930036N10Rik	0.270888	0.00799022	0.0263998
Kcnab2	2.07681	0.0235687	0.0527929		Slamf7	0.337169	9.97122e-06	0.000167277
Plekhn1	2.84433	0.0448415	0.0772591		Ifi214	0.152375	0.0346611	0.0670206
Abcb1b	8.53298	0.000760344	0.00508074		Ifi209	0.45026	0.0393014	0.0729197
Cdk5	3.25066	0.0110897	0.0324941		Ifi207	0.267018	0.00147407	0.00836635
Ncapg	Inf	0.0453561	0.0772591		Ifi204	0.18285	0.00579917	0.0215855
0610040J01Rik	Inf	0.0251524	0.0538829		Mndal	0.49863	1.30788e-05	0.000208403
Hopxos	Inf	0.0453561	0.0772591		Ifi203	0.497109	0.00352908	0.0152739
Gm33370	Inf	0.0453561	0.0772591		Ifi202b	0.168138	0.0150768	0.039039
Idua	Inf	0.0251524	0.0538829		Ifi205	0.322839	0.000323778	0.00268279
Chek2	Inf	0.00148735	0.00836635		Olfr433	0.382431	0.0242521	0.0533063
2900026A02Rik	Inf	0.007982	0.0263909		Fh1	0.496229	0.000123086	0.0012372
Cit	Inf	0.0453561	0.0772591		Cep170	0.274038	2.74496e-05	0.000386924
Ift81	Inf	0.0251524	0.0538829		Acbd3	0.320141	0.00120497	0.00726703
Scarb1	2.16711	0.0114852	0.0331636		Sde2	0.46438	0.0148647	0.0387
Nsun5	6.50132	0.00358941	0.0153605		Brox	0.422586	0.012966	0.0357718
Dnaaf5	Inf	0.014112	0.0374777		Bpnt1	0.380937	0.0235091	0.0527247
Mios	Inf	0.0251524	0.0538829		Atf3	0.258352	0.000108083	0.00113658
Gstk1	6.50132	0.00748967	0.0255797		D730003I15Rik	0.345383	0.0071183	0.0245964
Gimap6	2.50572	0.0304323	0.0611777		Tmem206	0.270888	0.034614	0.0669567
Gimap5	6.50132	0.00358941	0.0153605		Slc30a1	0.284433	0.0449461	0.0772591
Gimap3	6.90765	8.96643e-06	0.00015462		G0s2	0.101583	0.00020335	0.00186315
Herc3	Inf	0.0112264	0.0326622		Nmt2	0.483729	0.0397209	0.073408
Ccser1	Inf	0.0453561	0.0772591		Frmd4a	0.406332	0.0480599	0.080512
Wbp1	3.57573	0.000526087	0.00386207		Optn	0	0.045139	0.0772591
Gm1965	Inf	0.00148735	0.00836635		Upf2	0.47049	0.0273755	0.0571298
Fancd2	Inf	0.0251524	0.0538829		Kin	0.459332	0.011875	0.0338286
Acrbp	4.46966	0.0492589	0.08183		Mindy3	0.487599	0.0295247	0.0600628
Lpar5	Inf	0.0453561	0.0772591		Hacd1	0.304749	0.0181411	0.0442329
Ldhb	Inf	0.0453561	0.0772591		Plxdc2	0.344767	0.0114702	0.0331404
Tmc4	Inf	0.0453561	0.0772591		Pip4k2a	0.48252	0.000228134	0.00201655
Zfp667	Inf	0.0453561	0.0772591		Yme1l1	0.485617	0.0150052	0.0389171
Gpr4	Inf	0.0453561	0.0772591		Ehmt1	0.440193	0.0163041	0.0411287
1700058P15Rik	Inf	0.0453561	0.0772591		Mrpl41	0.484473	0.026173	0.0554461
9130221H12Rik	Inf	0.0453561	0.0772591		Ubac1	0.430234	0.0405977	0.0743648
Zfp27	Inf	0.0453561	0.0772591		Snapc4	0	0.045139	0.0772591
Trpm4	Inf	0.0453561	0.0772591		Sec16a	0.355541	0.0123041	0.0345848
Svip	5.48549	0.00032186	0.0026762		Med22	0.135444	0.0376847	0.0709378
Tarsl2	Inf	0.0251524	0.0538829		Olfm1	0.461031	2.37143e-05	0.000342377
Pex11a	Inf	0.014112	0.0374777		Ralgds	0	0.0109511	0.0322468
Homer2	Inf	0.0453561	0.0772591		Setx	0.406332	0.0431153	0.0767343
Gm45159	Inf	0.0453561	0.0772591		Lrrc8a	0.328936	0.00999407	0.0307175
Lipt2	Inf	0.0453561	0.0772591		Tor1b	0.494666	0.0192706	0.0461601
Olfr482	4.46966	0.0375203	0.0707965		Ass1	0.363182	3.20201e-05	0.000439642
Dkk3	Inf	0.0251524	0.0538829		Abl1	0.270888	0.00222845	0.0112114
Gm45792	Inf	0.0453561	0.0772591		Ciz1	0.386983	0.00624361	0.0225098
Rexo5	Inf	0.00454117	0.0178809		1110008P14Rik	0.491876	0.00876152	0.0281858
Slx1b	2.27546	0.0390712	0.0727086		Ralgps1	0.174142	0.0366809	0.0700533
Gm42715	Inf	0.0453561	0.0772591		Hspa5	0.432397	0.00390825	0.0162199
Ccdc189	Inf	0.0251524	0.0538829		Traf1	0.375858	0.000181899	0.00170934
Lhpp	Inf	0.007982	0.0263909		Rc3h2	0.437589	0.0139316	0.0374777
Mapk1ip1	4.46966	0.0375203	0.0707965		Rpl35	0.387268	9.91869e-29	2.36282e-25
6430531B16Rik	Inf	0.007982	0.0263909		Zeb2	0.461741	5.72582e-05	0.000706058
Pidd1	Inf	0.0453561	0.0772591		Zeb2os	0.348285	0.00762048	0.0258596
Cd81	2.20774	0.00110372	0.00679397		Rif1	0.406332	0.00885879	0.0283838
E230032D23Rik	Inf	0.0453561	0.0772591		Arl5a	0.264999	0.00264923	0.0128012
Ipcef1	2.84433	0.0402451	0.0740606		Stam2	0.430234	0.0331513	0.0650063
Enpp1	Inf	0.0453561	0.0772591		Cers6	0.36701	0.0042485	0.0171684
Traf3ip2	Inf	0.0453561	0.0772591		Tlk1	0.406332	0.040804	0.0745437
Mcm9	Inf	0.007982	0.0263909		Lnpk	0.325066	0.0404706	0.0743322
Aifm2	Inf	0.014112	0.0374777		Nfe2l2	0.423381	0.000822786	0.00537733
Klf16	3.25066	0.00928663	0.0291794		Agps	0.336275	0.000516984	0.00381286
Gm26541	Inf	0.0251524	0.0538829		Zc3h15	0.47187	0.000254401	0.00220376
Dcn	Inf	0.0453561	0.0772591		Traf6	0.295515	0.0238539	0.0528846
Arhgef25	Inf	0.0337165	0.0656471		Cd44	0.455585	9.52316e-05	0.00103118
Erbb3	Inf	0.0251524	0.0538829		Ehf	0.358529	0.0209866	0.0486021
Clec4g	Inf	0.00454117	0.0178809		Caprin1	0.499742	0.000109265	0.00113898
Tubgcp3	3.86016	0.0133314	0.0365453		Cstf3	0.32168	0.00215828	0.0109509
Gm30978	Inf	0.00259473	0.0126275		Katnbl1	0.279354	0.00753103	0.0256841
Ppp1r3b	Inf	0.0251524	0.0538829		Emc7	0.490985	0.000642172	0.00449273
1700030K09Rik	Inf	0.014112	0.0374777		Aqr	0.377309	0.00277258	0.0130567
Inpp4b	2.84433	0.0119461	0.0339572		Spred1	0.325066	0.0166438	0.041626
Podnl1	5.28232	0.0060079	0.0220694		Bmf	0.319261	0.0203335	0.0476578
Txnl4b	Inf	0.0453561	0.0772591		Ino80	0.334627	0.0117747	0.0336932
Tmem231	Inf	0.0251524	0.0538829		1700020I14Rik	0.448008	0.000546577	0.00396674
Gm32856	Inf	0.0453561	0.0772591		Mga	0.389402	0.0132572	0.0363838
Nr1d2	Inf	0.00259473	0.0126275		Tmem87a	0.423999	0.0155187	0.0398426
Nid2	Inf	0.014112	0.0374777		Zfp106	0.440767	0.000488803	0.00364451
Phf7	Inf	0.00259473	0.0126275		Snap23	0.49945	8.15202e-05	0.00092255
Ear1	Inf	0.0453561	0.0772591		Eif3j1	0.23219	1.1178e-05	0.000182573
Gm26782	Inf	0.0453561	0.0772591		Slc24a5	0.352155	0.0150553	0.0390045
Zfp219	Inf	0.0037667	0.0158254		Sppl2a	0.420344	0.000124041	0.00123895
Trac	4.6051	0.00778052	0.026216		Anapc1	0.382431	0.0191861	0.046029
Zfhx2	Inf	0.0453561	0.0772591		Cenpb	0.483729	0.0446958	0.0772591
Rabggta	4.06332	0.00112078	0.00688122		Slc23a2	0.203166	0.0136246	0.0370085
Kctd9	Inf	0.0453561	0.0772591		Btbd3	0.0812665	0.042227	0.0759191
Mtrf1	Inf	0.0453561	0.0772591		Kif16b	0.316036	0.0491253	0.081665
Tpm3-rs7	2.40592	8.66551e-09	4.25627e-07		Sec23b	0.494666	0.0301059	0.060907
Gm26870	3.86016	0.0163255	0.0411541		Plagl2	0.135444	0.00290423	0.0134732
Ccdc15	Inf	0.0337165	0.0656471		Rbm12	0.216711	0.00481326	0.0187508
Gm10687	Inf	0.0453561	0.0772591		2900097C17Rik	0.394381	0.00145048	0.00825644
Gm47230	Inf	0.0323278	0.063883		Chd6	0.483729	0.0435113	0.0771307
Bace1	Inf	0.0453561	0.0772591		Oser1	0.417066	0.00220542	0.0111497
Tnfaip8l3	Inf	0.0453561	0.0772591		Pltp	0.406332	0.0399449	0.0736504
Lysmd2	5.28232	0.0207608	0.0483207		Cd40	0.313456	0.0118572	0.0338278
Pik3r4	4.87599	0.0238066	0.0528737		Trp53rka	0.380937	0.0235091	0.0527247
Abhd14b	Inf	0.0453561	0.0772591		Cebpb	0.323595	0.00917159	0.0290107
Pik3ip1	2.60053	0.0148516	0.0387		Ptpn1	0.455751	0.000551966	0.00399056
Polm	Inf	0.014112	0.0374777		Dpm1	0.475706	0.00450523	0.0178574
Gm16141	Inf	0.0453561	0.0772591		Zbp1	0.302758	0.0408049	0.0745437
Prorsd1	5.68865	1.20787e-05	0.000195077		Pmepa1	0.459332	0.045395	0.077286
Ltc4s	Inf	0.0123654	0.0346959		Ctsz	0.459031	1.91266e-07	6.55586e-06
Sh3bp5l	5.28232	0.0149836	0.0389033		Zfp971	0.110818	0.00331178	0.0147188
Pemt	Inf	0.0251524	0.0538829		Fam217b	0.174142	0.0327821	0.06462
Hs3st3b1	Inf	0.0453561	0.0772591		Taf4	0.180592	0.0288614	0.0590919
Gm11508	Inf	0.014112	0.0374777		Cables2	0.22574	0.0401368	0.0738899
Skap1	2.43799	0.0365351	0.0698224		Ogfr	0.469822	0.0287191	0.0590025
Pcgf2	Inf	0.0251524	0.0538829		Zbtb46	0.485342	0.00814446	0.0267979
Nr1d1	Inf	0.0251524	0.0538829		Prpf6	0.386983	0.0148512	0.0387
Itgb3	Inf	0.014112	0.0374777		Tfe3	0.434355	0.00659917	0.0232896
Abca5	Inf	0.0207226	0.0483026		Cybb	0.421666	0.00105524	0.00658923
Cd300c	Inf	0.00454117	0.0178809		Usp9x	0.461242	0.00360203	0.0153745
Fads6	Inf	0.0453561	0.0772591		Ddx3x	0.373162	0.000122594	0.00123485
Tcrg-C1	6.09499	0.0152257	0.0392326		Kdm6a	0.284433	0.00277885	0.0130567
Aoah	Inf	0.0251524	0.0538829		Elk1	0.253958	0.0414605	0.0751082
Nkapl	Inf	0.0251524	0.0538829		Uxt	0.474055	0.0429994	0.07672
Tpmt	Inf	0.0251524	0.0538829		Lamp2	0.439167	6.43923e-05	0.000774722
Rsl1	Inf	0.0194317	0.0463133		Elf4	0.455092	0.0107555	0.0320672
Zfp85	Inf	0.014112	0.0374777		Phf6	0.212841	0.000291017	0.00249374
Zfp273	Inf	0.0453561	0.0772591		Gm14698	0.0580475	0.0129968	0.0358137
Gm47428	Inf	0.00148735	0.00836635		Mtmr1	0.384947	0.0229044	0.051841
F2r	6.29815	0.00125823	0.00745608		F8a	0.319261	0.0311001	0.0621531
Cenph	Inf	0.0453561	0.0772591		L1cam	0.47639	0.0334349	0.0653123
Mipol1	Inf	0.007982	0.0263909		Rpl10	0.448367	2.20277e-06	5.09596e-05
Dnaaf2	Inf	0.0251524	0.0538829		Ikbkg	0.348285	0.026925	0.0565212
Fntb	Inf	0.014112	0.0374777		Fundc2	0.437589	0.000463791	0.00353448
Samd15	Inf	0.0453561	0.0772591		Tbl1x	0.406332	0.0101767	0.0308403
Kcnk13	Inf	0.0251524	0.0538829		Prkx	0.382431	0.00115095	0.0070483
Bcl11b	3.65699	0.0237101	0.0528737		Zfx	0.341319	0.0035089	0.0152395
Skp2	Inf	0.007982	0.0263909		F630028O10Rik	0.46438	0.00109481	0.00677223
Drosha	4.87599	0.0238066	0.0528737		Med12	0.406332	0.040804	0.0745437
Snhg18	Inf	0.0251524	0.0538829		Magt1	0.425232	1.10397e-05	0.00018137
Naprt	Inf	0.0453561	0.0772591		Sh3bgrl	0.473073	5.34978e-07	1.60548e-05
Gm20324	Inf	0.0194317	0.0463133		Gm6377	0.467898	0.0115339	0.0332437
Krt83	3.3861	0.0142988	0.0378262		Chm	0.203166	0.0118193	0.0337601
Gm16861	Inf	0.0453561	0.0772591		Rpl36a	0.466819	6.525e-17	3.10876e-14
AC130815.2	Inf	0.0453561	0.0772591		Hnrnph2	0.437589	1.693e-05	0.000256066
Bex6	Inf	0.0112264	0.0326622		Gm15013	0.203166	0.00580854	0.0216035
Ccdc191	4.87599	0.0238066	0.0528737		Tsr2	0.270888	0.0239503	0.0529937
C330027C09Rik	Inf	0.007982	0.0263909		Phf8	0.369393	0.045602	0.0775395
Rnaset2b	6.39974	9.48516e-08	3.79756e-06		Kdm5c	0.474055	0.0414607	0.0751082
Zfp948	Inf	0.0453561	0.0772591		Sat1	0.380745	5.5119e-07	1.6413e-05
Zfp943	5.28232	0.0149836	0.0389033		Rbbp7	0.461428	1.71471e-05	0.000257713
Zfp758	Inf	0.0453561	0.0772591		Rab9	0.457124	0.0207029	0.0483026
Fahd1	4.46966	0.0375203	0.0707965		Mid1	0.0369393	0.0148634	0.0387
Gm20506	Inf	0.00454117	0.0178809		Gm9733	0.0659856	3.04074e-09	1.68456e-07
Msh5	Inf	0.007982	0.0263909		Sirpb1c	0.223197	2.21409e-05	0.000323582
Lst1	2.91689	9.47127e-07	2.49847e-05		Armc1	0.453217	0.0135007	0.0367766
Ltb	2.73428	2.59987e-06	5.87052e-05		Nceh1	0.406332	0.0495979	0.0821498
Atat1	4.87599	0.0238066	0.0528737		Atp11b	0.478892	0.0233598	0.0525472
Gm8909	Inf	0.007982	0.0263909		Larp1b	0.210691	0.000587127	0.00418757
Gm20478	Inf	0.007982	0.0263909		Maml3	0.23219	0.0493849	0.0819535
AY036118	3.92788	2.3088e-05	0.000335366		Ufm1	0.479606	0.00103259	0.00646472
Gm19585	Inf	0.0194317	0.0463133		Commd2	0.49755	0.00197298	0.0102352
Chaf1a	6.90765	0.00335289	0.0148324		Siah2	0.46438	0.0196177	0.0465932
Tnfaip8l1	Inf	0.0251524	0.0538829		Gpr171	0.434355	9.89476e-05	0.00106899
Ticam1	4.87599	0.0238066	0.0528737		Mbnl1	0.48896	1.09234e-11	1.33444e-09
Xdh	3.25066	0.0415893	0.0751982		Gmps	0.393225	0.00436742	0.0174744
Dync2li1	Inf	0.0453561	0.0772591		Ssr3	0.478748	5.18931e-05	0.000655806
Smad2	Inf	0.0001448	0.0014166		Ccnl1	0.406332	6.44187e-07	1.82688e-05
Rttn	Inf	0.0453561	0.0772591		Kpna4	0.388666	3.76718e-06	7.99724e-05
Fam89b	6.09499	0.00845898	0.0275474		Etv3	0.367999	0.00680561	0.0238241
Tmem132a	Inf	0.014112	0.0374777		Arhgef11	0.152375	0.0184636	0.0448128
Rbp4	Inf	0.0337165	0.0656471		Adam15	0.392788	0.0061104	0.0222062
Tctn3	Inf	0.0251524	0.0538829		Pmvk	0.47187	0.0305039	0.0612699
Scd2	2.03166	0.042926	0.07672		Adar	0.310725	0.00832634	0.0272084
Poll	Inf	0.0453561	0.0772591		4632404H12Rik	0.0677221	0.0233416	0.0525311
Mfsd13a	Inf	0.014112	0.0374777		Rps27	0.4745	1.0205e-09	6.43076e-08
					Slc39a1	0.335046	8.29018e-05	0.00092825
					Dennd4b	0.369393	0.00760612	0.0258449
					Pogz	0.253958	0.0414605	0.0751082
					Pi4kb	0.46051	0.0463808	0.0785273
					Vps72	0.490401	0.0115126	0.0332024
					Gabpb2	0.446966	0.0228847	0.051821
					Setdb1	0.375076	0.0430638	0.07672
					Ensa	0.492287	0.00258764	0.0126275
					Mcl1	0.427219	2.74139e-07	9.00762e-06
					Anp32e	0.465435	2.79057e-05	0.000392193
					Bola1	0.443272	0.0300116	0.0608239
					Fcgr1	0.208376	0.00365486	0.0155197
					Pias3	0.101583	0.00186591	0.00980143
					Notch2	0.380496	1.07418e-05	0.00017744
					Fam46c	0.22574	0.00243987	0.0120837
					Nras	0.459332	0.00236561	0.0117648
					Trim33	0.375076	0.0430638	0.07672
					Hipk1	0.449104	0.00355719	0.0153235
					Rsbn1	0.498681	0.0289064	0.0591332
					St7l	0.426649	0.0232568	0.0524248
					Cttnbp2nl	0.218794	0.00980094	0.0302996
					Rbm15	0.184697	6.50057e-05	0.000780131
					Ahcyl1	0.454136	0.0418933	0.0755187
					Slc35a3	0.258575	0.0167585	0.0418258
					Fnbp1l	0.284433	0.0312205	0.0623413
					Mettl14	0.116095	0.0035426	0.0152786
					Tbck	0.406332	0.024819	0.0538829
					Tet2	0.420344	0.00933464	0.0292398
					Dnajb14	0.425086	7.05455e-05	0.000827523
					Dapp1	0.411542	0.00016956	0.00162219
					Pdlim5	0.382431	0.00276455	0.0130567
					2410004B18Rik	0.304749	0.0101822	0.0308403
					Ifi44	0.388666	0.0499756	0.0826679
					Dnajb4	0.290237	0.0151621	0.0391468
					Rabggtb	0.455585	0.00778951	0.0262277
					Zranb2	0.406332	0.000899702	0.00575373
					Impad1	0.304749	0.0302685	0.0610028
					Asph	0.469822	0.0461443	0.0782202
					Usp45	0.156282	0.00251465	0.0123896
					Ufl1	0.406332	0.0230106	0.0519965
					Mdn1	0.451481	0.0383717	0.0718212
					Akirin2	0.485617	0.00561371	0.0210258
					Zfp292	0.406332	0.000887195	0.00568901
					Smu1	0.468845	0.00182708	0.00968917
					Rpp25l	0.453217	0.0107835	0.0320903
					Fam214b	0.316036	0.0491253	0.081665
					Creb3	0.399984	4.3074e-05	0.000561071
					Slc25a51	0.451481	0.034285	0.0665906
					Ccdc180	0.379244	0.0444208	0.0772591
					Tgfbr1	0.406332	0.00794999	0.0263909
					Nr4a3	0.254819	0.00314519	0.0141888
					Tex10	0.406332	0.040804	0.0745437
					Txn1	0.455041	0.000438268	0.00339498
					AI314180	0.487599	0.0283428	0.0584824
					Ptbp3	0.422425	3.92419e-07	1.24642e-05
					Trim32	0.180592	0.0440271	0.0772591
					Snapc3	0.430234	0.0317837	0.0631746
					Klhl9	0.304749	0.000765041	0.00509783
					Mtap	0.332454	0.0332948	0.0651187
					Plaa	0.487599	0.00641131	0.0229021
					Jun	0.352045	0.000475382	0.00359309
					Usp1	0.471346	0.0330711	0.0649478
					Lrrc42	0.431728	0.0405324	0.0743648
					Zyg11b	0.250051	0.0201917	0.0474386
					Nrd1	0.493404	0.00213838	0.0109431
					Nasp	0.487599	0.0120153	0.0340545
					Prdx1	0.479877	0.000509225	0.00376146
					Gm12840	0.374254	0.015575	0.0399382
					9530034E10Rik	0.284433	0.0287806	0.0590025
					1110065P20Rik	0.363561	0.0197438	0.0467761
					Yrdc	0.440193	0.0193298	0.0462278
					Snip1	0.406332	0.040804	0.0745437
					Marcksl1	0.399109	0.015132	0.0391392
					Pum1	0.397098	0.000225539	0.00200851
					Ythdf2	0.4143	0.000184381	0.00172586
					Ptafr	0.406332	0.00692081	0.0241034
					Eya3	0.256631	0.00237764	0.0118123
					Themis2	0.47187	0.0119525	0.0339572
					Stx12	0.484977	0.0117712	0.0336932
					Ahdc1	0.174142	0.0327821	0.06462
					Zdhhc18	0.355541	0.00873221	0.0281406
					Zfp593	0.46438	0.025381	0.0542506
					Clic4	0.401189	0.000171591	0.00163832
					Gale	0.295515	0.0368925	0.0701677
					Kdm1a	0.474055	0.020088	0.0473093
					Ece1	0.362797	3.14927e-06	6.94263e-05
					Eif4g3	0.406332	2.3377e-05	0.000338531
					Mul1	0.304749	0.0197179	0.0467381
					Emc1	0.406332	0.0172905	0.0427496
					Spen	0.228562	0.0062737	0.0225587
					Ddi2	0.440193	0.00078545	0.00518308
					Dnajc16	0.237027	0.00970534	0.0300846
					Vps13d	0.348285	0.0364788	0.0697427
					Tnfrsf1b	0.350287	0.00394088	0.0163269
					Tardbp	0.458575	0.000243373	0.00212756
					Pgd	0.46438	0.00997705	0.0307071
					Pik3cd	0.415166	0.000754685	0.00506952
					Eno1	0.457951	4.07399e-07	1.28543e-05
					Camta1	0.46438	0.0148338	0.0387
					Dnajc11	0.406332	0.0483877	0.081004
					Ski	0.370999	0.00786685	0.0263909
					Pusl1	0.332454	0.0357154	0.0685458
					Isg15	0.197889	0.0250471	0.0538829
					Gm26825	0.413942	1.07632e-05	0.00017744
					Rsbn1l	0.46438	0.000438947	0.00339498
					A630072M18Rik	0.135444	0.0016589	0.00903273
					Ptpn12	0.494666	0.0348657	0.0672524
					Gsap	0.442185	0.0051316	0.0196851
					5031425E22Rik	0.375076	0.00926602	0.0291794
					Fam126a	0.281307	0.01258	0.0350912
					Chpf2	0.430234	0.0248923	0.0538829
					Insig1	0.375076	0.00568529	0.0212114
					Rbm33	0.316036	0.00679844	0.0238164
					Selenoi	0.406332	0.0409788	0.0747468
					Tmem214	0.406332	0.00257748	0.0126275
					Preb	0.493973	0.000849269	0.00551259
					Fosl2	0.316036	0.00249194	0.0123159
					Fam193a	0.295515	0.00356175	0.015325
					Tnip2	0.363561	0.0134099	0.0365921
					Grpel1	0.499005	0.00140007	0.00807953
					Bloc1s4	0.406332	0.0100614	0.0307175
					Cd38	0.367634	0.0102314	0.0308854
					Lap3	0.432547	0.0159149	0.0404398
					Dhx15	0.445655	0.00107201	0.0066695
					Pi4k2b	0.304749	0.010836	0.0320998
					Stim2	0.459332	0.0361332	0.069221
					Rell1	0.290237	0.00460321	0.0180953
					Tbc1d1	0.318477	0.000299579	0.00253518
					Rpl9	0.361588	1.73718e-15	7.52417e-13
					Ube2k	0.399204	1.97968e-07	6.7371e-06
					Gm42726	0.240106	0.00238538	0.0118384
					Rbm47	0.459332	0.00142735	0.00819328
					Atp8a1	0.353902	0.00282276	0.013185
					Fryl	0.425682	0.0153392	0.0394184
					Chic2	0.450775	0.000102832	0.0010936
					Srp72	0.476763	0.000335988	0.00276853
					Rest	0.336959	0.00197426	0.0102352
					Cenpc1	0.348285	0.0283864	0.0585218
					Uba6	0.380937	0.0235091	0.0527247
					Utp3	0.458047	0.000680564	0.00467889
					Mob1b	0.406332	0.0318002	0.0631812
					Dck	0.350923	0.00793612	0.0263909
					Cxcl2	0.164977	0.0128398	0.035566
					Uso1	0.46438	0.00839483	0.0273759
					Sdad1	0.491379	0.022072	0.0504121
					Nup54	0.358529	0.0100408	0.0307175
					Cnot6l	0.474055	0.0187351	0.0453204
					Bmp2k	0.358529	6.36509e-05	0.000769688
					Rasgef1b	0.16897	0.000602417	0.00427105
					Plac8	0.465859	0.00518047	0.0197612
					Spp1	0.352454	0.00879803	0.0282569
					Lrrc8c	0.365699	0.00182584	0.00968917
					Zfp326	0.451481	0.0443411	0.0772591
					Golga3	0.348285	0.0467608	0.0790216
					Ep400	0.34382	0.00362967	0.0154541
					Sart3	0.406332	0.0388934	0.072554
					Oasl2	0.235935	0.0111227	0.032531
					Dynll1	0.454788	2.98147e-12	4.73495e-10
					Gcn1l1	0.451481	0.0329544	0.0648255
					Wsb2	0.310725	0.0119862	0.0339921
					Med13l	0.432269	0.0011596	0.00708304
					Oas2	0	0.045139	0.0772591
					Oas1a	0.228562	0.0254589	0.0543792
					Trafd1	0.492786	0.00681629	0.0238439
					Kdm2b	0.38289	0.00106256	0.00662621
					Orai1	0.487599	5.06169e-05	0.000643089
					Sbno1	0.482089	0.000903451	0.00576995
					Rilpl2	0.331482	0.00468338	0.0183499
					Ddx55	0.423263	0.00785452	0.0263906
					Eif2b1	0.426649	0.0241348	0.0531856
					Dhx37	0.203166	0.028077	0.0581237
					Slc15a4	0.426649	0.00338196	0.0149194
					Vkorc1l1	0.270888	0.037858	0.0710397
					Tmem120a	0.304749	0.0302685	0.0610028
					Rasa4	0.468845	0.0111634	0.03259
					Zkscan1	0.325066	0.0404706	0.0743322
					Adap1	0.135444	0.00294724	0.0135917
					Gpr146	0.422586	0.0259267	0.0550958
					Psmg3	0.494666	0.0253492	0.0542314
					Ttyh3	0.495218	0.0123576	0.0346959
					Foxk1	0.304749	0.0212846	0.049013
					Tnrc18	0.459332	0.0251433	0.0538829
					Actb	0.393491	2.78225e-10	2.10408e-08
					E130309D02Rik	0.386016	0.0146241	0.0383671
					Lmtk2	0.22574	0.0238002	0.0528737
					Bri3	0.428446	8.76451e-06	0.000152958
					Ptcd1	0.270888	0.034614	0.0669567
					Pan3	0.413588	0.000224765	0.00200675
					Slc7a1	0.352155	0.0385312	0.0720194
					Hsph1	0.365699	0.000481578	0.00360758
					N4bp2l2	0.440193	7.89854e-05	0.000899439
					Samd9l	0.351876	9.00772e-07	2.44619e-05
					Casd1	0.304749	0.0302685	0.0610028
					Tes	0.41175	0.000885328	0.00568469
					Fam3c	0.386983	0.0343095	0.066611
					Rbm28	0.369393	0.00521783	0.0198719
					Calu	0.446966	0.0219598	0.0502762
					Cnot4	0.436064	0.00157719	0.00868711
					Trim24	0.293462	0.0143311	0.0378905
					Ubn2	0.449559	0.00354357	0.0152786
					Parp12	0.424802	0.0239741	0.0529937
					Kdm7a	0.375472	2.2852e-06	5.2344e-05
					Ssbp1	0.455092	0.000910597	0.00580781
					Pdia4	0.410437	1.2439e-05	0.000199542
					Zfp398	0.308813	0.0045353	0.0178809
					Zfp467	0.125025	0.00339519	0.0149639
					Tra2a	0.477204	0.000193995	0.00179823
					Gsdme	0.477441	0.00770005	0.0260365
					Kbtbd2	0.369393	0.045602	0.0775395
					Herc6	0.424802	0.0336118	0.0655949
					Rmnd5a	0.278017	0.00183233	0.00968917
					Tgoln1	0.370053	8.6085e-05	0.000951606
					M1ap	0.116095	0.0414873	0.0751279
					Loxl3	0	0.0191353	0.045955
					Bola3	0.489104	0.00277123	0.0130567
					Stambp	0.330145	0.00967273	0.0300225
					1600020E01Rik	0.325066	0.00723218	0.0249507
					Isy1	0.431728	0.00532981	0.0201694
					Nup210	0.414147	0.00154075	0.00854564
					Ccdc174	0.36701	0.00608136	0.0221754
					Tmf1	0.462768	0.00429068	0.0172656
					Foxp1	0.444257	7.54293e-05	0.000870245
					Rybp	0.332454	0.00622481	0.0224847
					Ppp4r2	0.414625	0.000401017	0.0031683
					Bhlhe40	0.458328	0.000625376	0.00441412
					Arl8b	0.412308	0.000123922	0.00123895
					Setd5	0.480211	0.00472962	0.0184854
					Camk1	0.350923	0.0217849	0.0499719
					Irak2	0.45277	0.00431992	0.0173247
					Tmcc1	0.406332	0.00648849	0.0230871
					Csgalnact2	0.348285	0.0364788	0.0697427
					Kdm5a	0.474055	0.00427408	0.0172279
					Usp18	0.203166	0.00636956	0.022783
					Apobec1	0.292559	0.00833961	0.0272331
					Foxj2	0.295515	0.0368925	0.0701677
					Clec4d	0.0369393	0.034034	0.0661574
					Clec4e	0	0.0242567	0.0533063
					Grcc10	0.485488	0.000895622	0.00573534
					Nop2	0.480211	0.0445996	0.0772591
					D6Wsu163e	0.125025	0.00929357	0.0291794
					2310001H17Rik	0.355541	0.017986	0.0439898
					Etv6	0.290237	0.000102041	0.00109005
					Lrp6	0.361184	0.0171743	0.0425727
					Cdkn1b	0.291726	0.000866938	0.00559678
					Wbp11	0.483729	0.00508779	0.0195643
					Plekha5	0.397303	0.000866623	0.00559678
					Aebp2	0.332454	0.00399509	0.0164531
					Cmas	0.478569	0.00220959	0.0111497
					Tm7sf3	0.332454	0.0332948	0.0651187
					Med21	0.44272	8.28697e-05	0.00092825
					Ppp6r1	0.42717	0.00170407	0.00921548
					Clcn4	0.438411	0.0054105	0.0204423
					Ube2m	0.406332	8.59904e-05	0.000951606
					Relb	0.325066	0.000298078	0.00253148
					Apoe	0.431728	0.000128787	0.00128098
					Bcl3	0.420844	0.0159471	0.0404999
					Gm9844	0.445655	4.65377e-06	9.23848e-05
					Ccdc97	0.433421	0.0356959	0.0685458
					Axl	0.346869	0.0326399	0.0644196
					Zfp36	0.388604	0.000248595	0.00216924
					Paf1	0.430234	0.0236495	0.0528737
					Samd4b	0.203166	0.00229313	0.0114642
					Actn4	0.493404	0.00443718	0.0176612
					Kcnk6	0.34382	0.0444575	0.0772591
					Ppp1r14a	0.229666	0.00140827	0.0081033
					Tbcb	0.446966	4.20726e-07	1.31013e-05
					Polr2i	0.461741	0.000219006	0.00197245
					Nfkbid	0.352155	0.00277002	0.0130567
					Fxyd7	0.16007	0.0230167	0.0519965
					Rras	0.445031	0.0424154	0.0760855
					Aldh16a1	0.457124	0.0207029	0.0483026
					Ftl1	0.423667	1.14282e-06	2.91167e-05
					Grwd1	0.33861	0.0133711	0.0365737
					Saal1	0.332454	0.0491042	0.081665
					Spty2d1	0.292559	0.00225621	0.0113152
					E2f8	0	0.045139	0.0772591
					Nipa2	0.458426	0.00203642	0.0105231
					Herc2	0.383758	0.0164443	0.0412788
					Mcee	0.490985	0.0247337	0.0538829
					Selenos	0.446966	1.77757e-07	6.18177e-06
					Mrpl46	0.455092	0.00988677	0.030508
					Aen	0.478038	0.0412708	0.075107
					Isg20	0.108355	0.0412117	0.0750567
					Abhd2	0.433421	0.00692892	0.024114
					Zfp592	0.203166	0.028077	0.0581237
					Mex3b	0	0.0248611	0.0538829
					Gm44751	0.135444	0.0376847	0.0709378
					Hikeshi	0.485342	0.00409377	0.0167275
					Picalm	0.359221	1.01548e-07	3.99846e-06
					Gab2	0.352155	0.0150553	0.0390045
					Kctd14	0.414798	0.000692368	0.00474634
					Acer3	0.480731	0.000586301	0.00418757
					Thap12	0.203166	0.0239675	0.0529937
					Pold3	0.310725	0.0319749	0.0633697
					Fam168a	0.299403	0.00609539	0.0221754
					Nup98	0.478892	0.0190579	0.0458582
					Trim12c	0	0.00155783	0.00863036
					Trim30a	0.358055	5.4643e-05	0.000685106
					Lmo1	0.128316	6.74025e-05	0.000798834
					Dennd5a	0.427718	0.00301727	0.013796
					Swap70	0.432269	0.000384876	0.00307152
					Rnf141	0.465589	0.00436825	0.0174744
					Far1	0.424595	7.11807e-06	0.000133416
					Pik3c2a	0.375076	0.0430638	0.07672
					Palb2	0.33861	0.0441537	0.0772591
					Arhgap17	0.440193	0.00352889	0.0152739
					Il21r	0.406332	0.0409788	0.0747468
					Gtf3c1	0.243799	0.020027	0.0472593
					Nfatc2ip	0.284433	0.0287806	0.0590025
					Zfp768	0.243799	0.0479538	0.0804155
					Fbrs	0.355541	0.0189698	0.0457385
					Zfp668	0.162533	0.00905433	0.0287039
					Inpp5f	0.290237	0.0229482	0.0518943
					Acadsb	0.261214	0.00676328	0.0237107
					Abraxas2	0.483206	0.00466319	0.0183008
					Adam8	0.406332	0.00266773	0.0128514
					Ric8a	0.468845	0.00500074	0.0192762
					Ifitm1	0.279097	0.0285534	0.0587897
					Rnh1	0.468845	1.02286e-05	0.000170395
					Hras	0.353333	0.00619034	0.0223772
					Irf7	0.207489	0.0382868	0.071704
					Tmem80	0.372471	0.0373028	0.0705817
					Polr2l	0.332967	2.58625e-07	8.55685e-06
					Nap1l4	0.493973	0.00173193	0.00931331
					Ppfia1	0.34382	0.0444575	0.0772591
					Katna1	0.484473	0.0290682	0.0593367
					Ppil4	0.496629	0.00555179	0.020909
					Tab2	0.437589	0.00327017	0.0145747
					Stx11	0.243799	0.00312238	0.0141409
					Hivep2	0.451481	0.00214603	0.0109503
					Cited2	0.317447	0.0034021	0.0149805
					Reps1	0.427718	0.049639	0.0821749
					Tnfaip3	0.424259	0.0175482	0.0432074
					E030030I06Rik	0	0.045139	0.0772591
					Rwdd1	0.447338	4.32303e-06	8.71438e-05
					Fam26f	0.167313	0.0255693	0.0545554
					Dse	0.310725	0.0272004	0.056849
					Marcks	0.372471	3.35542e-07	1.08752e-05
					Gtf3c6	0.44272	0.000295771	0.00252087
					Foxo3	0.278017	0.00517618	0.0197607
					Sec63	0.348285	0.00346719	0.0151216
					Crybg1	0.330145	0.00900712	0.0287039
					Ascc3	0.365699	0.000107725	0.00113549
					Lilr4b	0.341689	0.00260137	0.0126469
					Lilrb4a	0.391283	0.0118158	0.0337601
					Gopc	0.152375	0.00388078	0.0161339
					Pkib	0.484473	0.000746819	0.00503985
					Sowahc	0.302758	0.00212438	0.0108949
					Dnajb12	0.454136	0.0434997	0.0771307
					Supv3l1	0.203166	0.0362607	0.0694093
					Jmjd1c	0.47083	0.000519594	0.00382105
					Egr2	0.270888	0.0092967	0.0291794
					Ado	0.496629	0.0288277	0.0590737
					Mcm3ap	0.295515	0.0368925	0.0701677
					Pofut2	0.453217	0.0179991	0.0439992
					Trappc10	0.295515	0.0368925	0.0701677
					Cstb	0.262289	9.57908e-06	0.000162097
					Ilvbl	0.430234	0.0274486	0.0572574
					Mier2	0.406332	0.022096	0.0504184
					Stk11	0.478569	0.00283052	0.0132083
					Dot1l	0.386983	0.0193035	0.0462018
					Gadd45b	0.20195	1.46128e-05	0.000229772
					Mrpl54	0.494808	3.26778e-06	7.10912e-05
					D10Wsu102e	0.256631	0.00344832	0.0150864
					Washc4	0.487599	0.014151	0.0375604
					Ckap4	0.334627	0.011115	0.0325283
					Ikbip	0.284433	0.0449461	0.0772591
					Plxnc1	0.325066	0.0127657	0.0354226
					Btg1	0.465622	0.000177623	0.00168578
					Osbpl8	0.373826	0.0151437	0.0391468
					Krr1	0.438839	0.0133594	0.0365737
					Tbc1d15	0.445975	0.005435	0.0205023
					Rab21	0.475706	0.00450523	0.0178574
					Dyrk2	0.22574	0.000323707	0.00268279
					Cand1	0.494666	0.0310395	0.0621101
					Lemd3	0.180592	0.0288614	0.0590919
					Rassf3	0.32168	0.00175692	0.00942113
					Tbk1	0.406332	0.027125	0.0567774
					Mon2	0.258575	0.0167585	0.0418258
					Usp15	0.406332	0.00231702	0.0115715
					R3hdm2	0.459332	0.0136087	0.0370074
					Timeless	0.496629	0.0466884	0.0789625
					Stat2	0.424392	0.00423062	0.0171251
					Smarcc2	0.365699	0.00147619	0.00836635
					Trappc5	0.442054	6.56843e-05	0.000782273
					Cd209d	0.274274	0.00152589	0.00851277
					Ctxn1	0.23219	0.0493849	0.0819535
					Rab20	0.333773	0.0269415	0.0565212
					Rasa3	0.453217	0.0159972	0.0405408
					Mrps31	0.312563	0.0248183	0.0538829
					Kat6a	0.387863	0.00930159	0.0291794
					Gpat4	0.33861	0.00299053	0.0137264
					Tacc1	0.480608	0.000156174	0.00151854
					Nsd3	0.497757	0.000101398	0.00108562
					Erlin2	0.406332	0.0164974	0.0413902
					Rab11fip1	0.476999	0.0245088	0.053747
					Cnot7	0.487599	0.0246094	0.0538826
					Acsl1	0.406332	0.00818493	0.0268754
					Galnt7	0.406332	0.0236816	0.0528737
					Nr2c2ap	0.444131	0.00215438	0.0109509
					Upf1	0.304749	0.000652765	0.00454018
					Myo9b	0.369393	0.000634597	0.00447258
					Ocel1	0.406332	0.0100614	0.0307175
					Bst2	0.314208	5.73515e-05	0.000706058
					Colgalt1	0.457124	0.00070257	0.00479558
					Med26	0.270888	0.0139613	0.0374777
					Hmgxb4	0.203166	0.00926898	0.0291794
					Zfp330	0.492524	0.0108287	0.0320998
					Dnajb1	0.356476	0.00313264	0.0141739
					Gipc1	0.445655	0.00818134	0.0268754
					Cc2d1a	0.253958	0.00550532	0.0207512
					Ier2	0.336275	0.00110201	0.00679223
					Trmt1	0.476999	0.0237056	0.0528737
					Nfix	0.425682	0.0281568	0.0582304
					Junb	0.464495	0.00352965	0.0152739
					Phkb	0.380937	0.0484736	0.081096
					Lonp2	0.369393	0.00760612	0.0258449
					Rspry1	0.390704	0.00867317	0.0280532
					Sap18b	0.474055	0.0414607	0.0751082
					Nae1	0.471346	0.0201926	0.0474386
					Fam96b	0.499348	5.55713e-05	0.000693097
					Fhod1	0.270888	0.0246591	0.0538829
					Pard6a	0.258575	0.0182947	0.0445198
					Ddx28	0.203166	0.0118193	0.0337601
					Gm10073	0.102699	4.90882e-12	6.68214e-10
					Cdh1	0.135444	0.0348129	0.0672051
					Cyb5b	0.354239	0.000853565	0.00553294
					Nob1	0.468845	0.0282615	0.0583652
					Dhx38	0.355541	0.0131403	0.0361462
					Glg1	0.426649	0.0340342	0.0661574
					Gan	0.312563	0.0162609	0.0410779
					Cmip	0.440193	0.0104732	0.0314221
					Piezo1	0.239632	2.66151e-05	0.000377394
					Trappc2l	0.426649	2.45746e-05	0.000352022
					Disc1	0.203166	0.0485958	0.081096
					Coa6	0.392788	0.00302209	0.0138048
					Irf2bp2	0.23864	1.65087e-05	0.00025049
					Slc4a7	0.41944	0.00612139	0.0222292
					Zswim8	0.348285	0.00443112	0.0176518
					Arf4	0.432269	5.16993e-06	0.000100949
					Fam208a	0.290237	0.00215771	0.0109509
					Gnl3	0.348285	0.000186914	0.00174272
					Pbrm1	0.489257	0.00277582	0.0130567
					Capn7	0.386016	0.00770538	0.0260365
					Mettl6	0.365699	0.0150046	0.0389171
					Wapl	0.480211	0.000576733	0.00414259
					Ddhd1	0.342175	0.00738493	0.0252945
					Mapk1ip1l	0.471346	0.0242426	0.0533063
					Naa30	0.162533	0.0170351	0.0423821
					Tep1	0.459689	0.00121464	0.00730685
					Psme2	0.454638	1.09925e-06	2.81927e-05
					Zdhhc20	0.484141	0.00270989	0.0129632
					Phf11b	0.446713	0.00425871	0.0171805
					Phf11d	0.253958	0.0203109	0.047646
					Ctsb	0.460433	0.000418687	0.00326479
					Hmbox1	0.278017	0.0030302	0.0138286
					Extl3	0.406332	0.0217387	0.0498899
					Dpysl2	0.406332	3.87009e-06	8.0871e-05
					Gfra2	0.367634	0.0325253	0.06422
					Rb1	0.345383	0.0123869	0.0347153
					Rubcnl	0.0812665	0.00371519	0.0157059
					Nufip1	0.309587	0.0040442	0.0165961
					Akap11	0.286823	0.00913209	0.0289095
					Naa16	0.379244	0.0302165	0.0610028
					Mzt1	0.357573	0.0136342	0.0370135
					Kctd12	0.419877	3.80126e-07	1.22369e-05
					Mycbp2	0.488205	9.0284e-06	0.000154729
					Rap2a	0.373826	0.0434165	0.0770976
					Msantd4	0.304749	0.010836	0.0320998
					Casp4	0.215117	0.00407351	0.0166877
					Birc2	0.419877	0.00920417	0.0290412
					Ccdc82	0.325066	0.0306176	0.0614647
					Med17	0.454136	0.0322267	0.0637098
					Olfr77	0.424802	0.0119355	0.0339494
					Zfp266	0.384947	0.0133984	0.0365921
					Icam1	0.359448	0.00371024	0.0157059
					Cdkn2d	0.349446	0.0100105	0.0307175
					Slc44a2	0.458205	0.0157519	0.0401541
					Ilf3	0.480211	0.0414259	0.0751082
					Qtrt1	0.248314	0.00421715	0.0170851
					Spc24	0.0812665	0.042227	0.0759191
					Dpy19l1	0.469384	0.000755472	0.00506952
					2023-09-07	0.498018	1.46609e-06	3.60053e-05
					Zbtb44	0.406332	0.04754	0.0799219
					Fam118b	0.386983	0.0135466	0.0368596
					Msantd2	0.203166	0.0136246	0.0370085
					Ubash3b	0.45026	0.00591719	0.0218604
					Nectin1	0.406332	0.0163654	0.0411645
					Dpagt1	0.445031	0.0237776	0.0528737
					Ddx6	0.442612	0.000169398	0.00162219
					Ift46	0.330145	0.00900712	0.0287039
					Mpzl3	0.284433	0.0449461	0.0772591
					Rexo2	0.373087	7.01519e-07	1.96606e-05
					AU019823	0.406332	0.0146227	0.0383671
					Dlat	0.390079	0.00521505	0.0198719
					Pstpip1	0.476659	0.000743305	0.00502325
					Sin3a	0.355541	0.0123041	0.0345848
					Arih1	0.496629	0.0429072	0.07672
					Myo9a	0.406332	0.019243	0.0461172
					Dennd4a	0.424392	0.00448595	0.0178107
					Dpp8	0.496629	0.0410029	0.0747622
					Plekho2	0.49849	0.000163845	0.00157701
					Lactb	0.453826	0.00055174	0.00399056
					Mindy2	0.299403	0.00035796	0.00290538
					Senp6	0.446169	0.000992769	0.00624463
					Hmgn3	0.49945	7.65904e-05	0.000879291
					Bcl2a1d	0.281566	2.33805e-06	5.32983e-05
					Bcl2a1b	0.206461	0.00627002	0.0225587
					Xrn1	0.331086	0.00161664	0.00886339
					Rnf7	0.487599	0.000784247	0.00518232
					Topbp1	0.320789	0.0109135	0.0322155
					Pcbp4	0.135444	0.0376847	0.0709378
					Rrp9	0.459332	0.0156316	0.0399973
					Tex264	0.365699	0.00258727	0.0126275
					Manf	0.495369	1.15243e-06	2.92054e-05
					Rbm15b	0.184697	0.0142126	0.037654
					Gmppb	0.287819	0.00561871	0.0210258
					Dag1	0.184697	0.0142126	0.037654
					Qrich1	0.353902	0.000920751	0.00585689
					4833445I07Rik	0.101583	0.0241727	0.0532199
					Arih2	0.441666	0.0211875	0.0488602
					Slc25a20	0.331086	0.00888611	0.0284471
					Map4	0.457124	0.00524183	0.0199156
					Elp6	0.22574	0.0238002	0.0528737
					Clasp2	0.406332	0.0303975	0.0611595
					Bcl2a1c	0.0677221	0.00117401	0.0071527
					Tmppe	0.0677221	0.0233416	0.0525311
					Golga4	0.478569	0.00394933	0.0163476
					Trak1	0.406332	0.040804	0.0745437
					Higd1a	0.473397	1.27501e-05	0.000203846
					Snrk	0.369393	0.00725355	0.0249856
					Abhd5	0.250051	0.027819	0.0578022
					Zfp445	0.424802	0.0195909	0.0465654
					Fyco1	0.427718	0.0156151	0.039977
					Ccr5	0.409507	7.33175e-06	0.000135711
					Tug1	0.41903	0.00699692	0.0242974
					Sf3a1	0.445031	0.0371691	0.0705248
					Tbc1d10a	0.325066	0.00651848	0.0231271
					Purb	0.390999	9.96711e-05	0.00107437
					Xpo1	0.367634	0.000162346	0.00157211
					Ahsa2	0.25097	0.000181181	0.00170596
					0610010F05Rik	0.304749	0.0302685	0.0610028
					Pex13	0.426649	0.0298958	0.0606624
					Rel	0.362908	0.000213008	0.00194416
					Sptbn1	0.406332	0.0027888	0.0130648
					Sh3pxd2b	0.496629	0.0426814	0.0764764
					Ccng1	0.494188	0.00624277	0.0225098
					Gm12166	0.192473	0.00137041	0.00794301
					Timd4	0.18178	0.00314621	0.0141888
					Irgm1	0.281945	0.00281593	0.013166
					Ifi47	0.183248	0.00294976	0.0135917
					Sqstm1	0.480662	0.0174188	0.0429778
					Col23a1	0.304749	0.0302685	0.0610028
					0610009B22Rik	0.476999	0.0151891	0.0391594
					Aff4	0.454136	0.0403029	0.0741171
					Fam114a2	0.498681	0.0309673	0.0620437
					Alkbh5	0.43121	0.00148468	0.00836635
					Aldh3a2	0.406332	0.0394716	0.073089
					Ulk2	0.261214	0.00738008	0.0252945
					Akap10	0.379244	0.0331554	0.0650063
					Specc1	0.312563	0.0451756	0.0772591
					Sco1	0.162533	0.0270159	0.0566024
					Pik3r5	0.476999	0.0188947	0.0456267
					Kdm6b	0.311522	0.000640453	0.00449273
					Fxr2	0.406332	0.0226227	0.051301
					Kctd11	0.162533	0.00905433	0.0287039
					Clec10a	0.427813	0.00305561	0.0139179
					Cxcl16	0.37048	0.000283666	0.00243512
					Psmb6	0.489534	8.08229e-06	0.000143683
					Eno3	0.120395	0.017118	0.0424774
					Rabep1	0.455092	0.0211831	0.0488602
					Xaf1	0.348285	0.0101607	0.0308403
					Cluh	0.304749	0.0101822	0.0308403
					Pafah1b1	0.445403	1.46069e-06	3.60053e-05
					Gm45606	0.0677221	0.0494379	0.0819844
					Slc43a2	0.380937	0.00192896	0.010055
					Crk	0.448367	0.0078828	0.0263909
					Taok1	0.457124	0.0132398	0.0363571
					Flot2	0.358529	0.0107191	0.0319787
					Supt6	0.423999	0.0121986	0.0344089
					2610507B11Rik	0.406332	0.021206	0.0488794
					Tmem199	0.433421	0.0375372	0.0708003
					Lgals9	0.485342	0.0472663	0.079546
					Tefm	0.203166	0.0239675	0.0529937
					Adap2	0.312563	0.00213632	0.0109431
					Psmd11	0.490765	0.00144435	0.00824536
					Slfn5	0.300333	3.55153e-05	0.00048284
					Slfn8	0.386016	0.0152583	0.0392953
					Slfn2	0.427294	1.14714e-05	0.000185898
					Slfn1	0.221636	0.0429066	0.07672
					Ccl3	0.414265	0.0431861	0.0768029
					Ccl4	0.423804	0.0188079	0.0454402
					Wfdc17	0.448466	4.35852e-05	0.000564777
					Appbp2	0.406332	0.0163917	0.0411899
					Vmp1	0.421522	4.36233e-05	0.000564777
					Cltc	0.393082	0.000136323	0.00134319
					Mtmr4	0.359448	0.00380076	0.0159331
					Msi2	0.312563	0.0248183	0.0538829
					Gm45716	0.0870712	0.0157079	0.0400848
					Spag9	0.47331	0.000106134	0.0011237
					Gngt2	0.494063	0.0155908	0.0399573
					Ube2z	0.265679	0.00185818	0.0097716
					Mllt6	0.383758	0.0218683	0.0501148
					Pip4k2b	0.215117	0.00129638	0.00764414
					Plxdc1	0.284433	0.0449461	0.0772591
					Arl5c	0.207681	0.0350292	0.0675025
					Dhx58	0.423263	0.0450613	0.0772591
					Stat5a	0.327323	0.00516473	0.0197464
					Tmem106a	0.265963	4.31015e-05	0.000561071
					Dhx8	0.430234	0.0405977	0.0743648
					Dusp3	0.450862	7.34199e-05	0.000853173
					Kansl1	0.471346	0.0124951	0.0349267
					Tlk2	0.34382	0.0224476	0.0509765
					Bptf	0.483206	0.00516237	0.0197464
					Gna13	0.393433	0.000226982	0.00201384
					Fam104a	0.47111	0.00010949	0.00113898
					Cd300a	0.482022	0.000592941	0.00421013
					Cd300lf	0.227068	0.000715945	0.00486596
					Mif4gd	0.39383	0.000817988	0.00535495
					Slc25a19	0.182149	0.000108717	0.00113839
					Recql5	0.253958	0.0414605	0.0751082
					Smim5	0.211293	0.00161558	0.00886339
					Galk1	0.358529	0.0395754	0.0732242
					1810032O08Rik	0.375076	0.0430638	0.07672
					Mfsd11	0.406332	0.0332763	0.0651187
					Tmc8	0.281307	0.011588	0.0333594
					Rnf213	0.270888	0.00829217	0.0271713
					Faap100	0.406332	0.0332763	0.0651187
					Slc25a10	0.125025	0.00929357	0.0291794
					P4hb	0.494063	0.000172371	0.00163921
					Mafg	0.291726	0.000485587	0.0036319
					Dus1l	0.373826	0.00291228	0.0134842
					Foxk2	0.203166	0.00320784	0.0143999
					Fn3krp	0.0812665	0.042227	0.0759191
					Fam208b	0.261214	0.0111601	0.03259
					Klf6	0.364364	8.19919e-05	0.000923501
					Gtpbp4	0.496629	0.0011646	0.00710449
					Larp4b	0.448367	0.00111558	0.00685813
					Lgals8	0.406332	0.0455023	0.0774251
					Gpr137b	0.406332	0.00193899	0.0100963
					Cdk13	0.340795	0.00138192	0.00799999
					Zscan26	0.386511	0.00135296	0.00787058
					Hist1h4i	0.295515	0.0391205	0.0727086
					Zfp322a	0.308813	0.00275831	0.0130567
					Hist1h1c	0.406332	0.0269602	0.0565355
					BC005537	0.389042	4.83326e-07	1.47612e-05
					Acot13	0.383758	0.0268637	0.0564574
					Tubb2b	0.135444	0.0058404	0.0216763
					Prpf4b	0.475096	0.000180342	0.00170346
					Eci2	0.442451	0.00122473	0.00733049
					Ssr1	0.383394	9.27585e-08	3.74523e-06
					Gfod1	0.189622	0.00341956	0.0150158
					Cd83	0.411337	0.000828937	0.0054027
					Jarid2	0.417465	0.00030945	0.00259567
					Dtnbp1	0.434355	0.0238397	0.0528846
					Nup153	0.427718	0.0211683	0.0488602
					Ninj1	0.330736	0.0222353	0.0506623
					Gadd45g	0.346869	0.0302967	0.0610339
					Thoc3	0.453217	0.0139567	0.0374777
					B4galt7	0.297977	0.0178816	0.0438244
					B230219D22Rik	0.400689	4.40681e-05	0.000567453
					Hnrnpa0	0.46438	0.000197337	0.00181503
					Rmi1	0.319261	0.0215431	0.0494886
					Ctsl	0.261214	0.0184933	0.0448621
					Zfp729b	0.184697	0.00777849	0.026216
					Zfp738	0.435356	0.0460588	0.0781487
					Ccdc127	0.430234	0.0405977	0.0743648
					Ccnh	0.457124	0.0377752	0.0709559
					Zfyve16	0.316036	0.0491253	0.081665
					Arsb	0.463132	0.000112324	0.00115335
					Aggf1	0.423263	0.0162962	0.0411287
					Hmgcr	0.432547	0.0125045	0.0349267
					Gfm2	0.369393	0.048536	0.081096
					Gm10260	0.297804	5.68891e-30	2.71041e-26
					Gm10320	0.356356	1.02582e-09	6.43076e-08
					Ak6	0.457124	0.00997615	0.0307071
					Slc30a5	0.392321	0.00310817	0.0141034
					Erbin	0.422586	0.0107703	0.0320899
					Ppwd1	0.270888	0.0113163	0.0328084
					Smim15	0.443956	0.000547006	0.00396674
					Gpbp1	0.448549	3.68463e-06	7.90766e-05
					Mier3	0.243799	0.020027	0.0472593
					Map3k1	0.334627	7.04333e-05	0.000827523
					Snx18	0.36701	0.00268234	0.0128835
					Gm21188	0.253958	0.0181557	0.0442458
					BC147527	0.406332	0.0226115	0.0513
					Asxl2	0.474055	0.00609511	0.0221754
					Hs1bp3	0	0.045139	0.0772591
					Smc6	0.488566	0.00048154	0.00360758
					Fam49a	0.424802	0.0195909	0.0465654
					Rock2	0.492524	0.012036	0.0340726
					Nol10	0.203166	0.028077	0.0581237
					Odc1	0.203166	0.00273766	0.0130302
					Rnaseh1	0.312563	0.0248183	0.0538829
					Nampt	0.328524	0.00905047	0.0287039
					Gdap10	0.154793	0.000341385	0.00280429
					Ahr	0.494188	0.0379271	0.0711414
					Dnajb9	0.382431	0.00178096	0.00952124
					Pnpla8	0.406332	0.0418896	0.0755187
					Strn3	0.474055	0.0159931	0.0405408
					Heatr5a	0.426649	0.0232568	0.0524248
					Cfl2	0.47049	0.0378453	0.0710397
					Baz1a	0.414379	9.49175e-07	2.49847e-05
					Nfkbia	0.376651	0.000662178	0.00458557
					Ralgapa1	0.383758	0.0209668	0.0485865
					Arf6	0.484589	5.21791e-05	0.000657675
					Sav1	0.297977	0.0132363	0.0363571
					Actr10	0.429551	0.00219755	0.0111264
					Hif1a	0.326398	7.2986e-05	0.000850204
					Erh	0.388968	4.70702e-07	1.44684e-05
					Susd6	0.213859	0.0201333	0.047346
					Cox16	0.430234	0.0317837	0.0631746
					Sipa1l1	0.443272	0.0336346	0.0655949
					Elmsan1	0.386016	0.0390986	0.0727086
					Rnf113a2	0.384947	0.0127394	0.0353909
					Arel1	0.284433	0.0287806	0.0590025
					Dlst	0.499208	0.0239388	0.0529937
					Nek9	0.365699	0.0109414	0.032238
					Fos	0.453443	0.0372379	0.0705711
					Batf	0.372471	0.00191272	0.00998131
					Gm26531	0.23219	0.0493849	0.0819535
					Ahsa1	0.451481	5.75758e-06	0.000109725
					Gtf2a1	0.22574	4.16337e-05	0.000547952
					Trip11	0.368239	0.00128883	0.00760903
					Cpsf2	0.394723	0.00163258	0.00892
					Rin3	0.45358	0.00143671	0.00822719
					Lgmn	0.349303	0.0139879	0.0374777
					Prima1	0.0677221	0.0494379	0.0819844
					Ifi27l2a	0.464989	8.36547e-05	0.000933403
					Gskip	0.493404	0.0199263	0.0471384
					Setd3	0.445975	0.00375256	0.0158022
					Yy1	0.490401	0.0004809	0.00360758
					Dync1h1	0.437589	0.00281205	0.0131608
					Hsp90aa1	0.414072	9.41484e-07	2.49847e-05
					Ckb	0.212318	2.63667e-18	1.39644e-15
					Trmt61a	0.312563	0.0175225	0.0431725
					Apopt1	0.496629	0.0241037	0.053156
					Klc1	0.483729	0.0230542	0.0520565
					Gpr132	0.436431	0.00187199	0.00982253
					Brf1	0.406332	0.0114524	0.033109
					Fbxo4	0.451481	0.0329544	0.0648255
					Ptger4	0.274549	0.000759427	0.00508074
					Rictor	0.274872	0.00039797	0.00315488
					Golph3	0.497757	0.00408987	0.0167259
					Basp1	0.418283	0.0014465	0.00824536
					Ctnnd2	0.449104	0.0430054	0.07672
					Mtdh	0.461594	4.2257e-06	8.63243e-05
					Vps13b	0.358529	0.0200698	0.0472899
					Rrm2b	0.46051	0.0485437	0.081096
					Ubr5	0.325066	0.00723218	0.0249507
					Dcstamp	0.133423	0.00321377	0.0144042
					Dpys	0	0.0478547	0.0803335
					Mtss1	0.284433	0.00183041	0.00968917
					Ly6a	0.0364657	0.0197133	0.0467381
					Ly6c2	0.277661	0.0251967	0.0539535
					Cyc1	0.454916	9.59441e-06	0.000162097
					Arhgap39	0.355541	0.0245136	0.053747
					Csf2rb	0.46438	0.00185554	0.00976851
					Maff	0.35708	0.0207915	0.0483686
					Ddx17	0.400609	1.70954e-06	4.07245e-05
					Atf4	0.463697	0.000172069	0.00163921
					Rps19bp1	0.406332	0.00257347	0.0126275
					St13	0.492678	7.92336e-07	2.19476e-05
					Rangap1	0.444426	0.00438669	0.0175334
					Ccdc134	0.243799	0.0331121	0.0649748
					Poldip3	0.443272	0.0145576	0.0382678
					Pacsin2	0.46438	0.00200384	0.0103772
					Tspo	0.419007	1.10063e-06	2.81927e-05
					Creld2	0.371504	0.000126379	0.00125966
					Selenoo	0.304749	0.003959	0.0163592
					Lmf2	0.361184	0.00873159	0.0281406
					Arsa	0.253958	0.0414605	0.0751082
					Zcrb1	0.486005	0.000779639	0.0051662
					Asb8	0.372471	0.0373028	0.0705817
					Ccnt1	0.394019	0.00214619	0.0109503
					Ddx23	0.425682	0.0108224	0.0320998
					Kmt2d	0.406332	0.00266773	0.0128514
					Lima1	0.240106	0.0100082	0.0307175
					Larp4	0.189622	9.88702e-06	0.000166451
					Dip2b	0.363561	0.0134099	0.0365921
					Tfcp2	0.116095	0.0210216	0.0486426
					Nr4a1	0.446804	0.00633406	0.0227072
					Mfsd5	0.498681	0.0387818	0.0724026
					Sp1	0.247333	0.0018432	0.00973583
					Cbx5	0.406332	0.0265499	0.055946
					Usp7	0.250051	1.55539e-05	0.000239048
					1810013L24Rik	0.295515	0.00187505	0.00982778
					Ciita	0.499926	2.13215e-07	7.20454e-06
					Dexi	0.228562	0.00429635	0.0172738
					Litaf	0.336558	9.86583e-07	2.58267e-05
					Snn	0	0.045139	0.0772591
					Rsl1d1	0.411899	8.54259e-05	0.000950939
					Mpv17l	0	0.0248611	0.0538829
					Abcc1	0.297977	0.00790914	0.0263909
					Mcm4	0.461741	0.0485119	0.081096
					Dnm1l	0.440193	0.0129943	0.0358137
					Top3b	0.478038	0.0395362	0.0731802
					Pi4ka	0.406332	0.0140811	0.0374777
					Snap29	0.365699	0.0109414	0.032238
					Txnrd2	0.449104	0.0291542	0.0594106
					Yeats2	0.332454	0.0357154	0.0685458
					Dvl3	0.253958	0.0414605	0.0751082
					Senp2	0.445655	0.00608044	0.0221754
					Rtp4	0.266218	0.0097208	0.0301129
					Bcl6	0.309587	0.0040442	0.0165961
					Lpp	0.458762	0.0148623	0.0387
					Ccdc50	0.452116	0.00115483	0.00706298
					Atp13a3	0.332454	0.00431176	0.0173066
					Apod	0.135444	0.0469351	0.0791697
					Ubxn7	0.243799	0.020027	0.0472593
					AC140186.1	0	0.00808455	0.026656
					Iqcg	0	0.00773239	0.0260907
					Parp14	0.334627	0.00599588	0.0220422
					Kpna1	0.284433	0.00150135	0.00842522
					Cd86	0.434037	0.000306952	0.00257926
					Golgb1	0.457124	0.00272622	0.0130018
					Lrrc58	0.317224	6.94178e-10	4.59351e-08
					Adprh	0.490401	0.000676042	0.00465451
					D930030I03Rik	0.135444	0.0278668	0.0578762
					Cd80	0.387863	0.0338028	0.0657882
					Timmdc1	0.162533	0.0270159	0.0566024
					Zdhhc23	0.218794	0.0105711	0.0316759
					Atp6v1a	0.444426	0.00650704	0.0231271
					Naa50	0.363561	1.5886e-06	3.84263e-05
					Cd200r1	0.36669	0.000407106	0.00317969
					Slc35a5	0.270888	0.00372898	0.0157502
					Bbx	0.47187	0.0235089	0.0527247
					Alcam	0.441784	2.99941e-06	6.67772e-05
					Nfkbiz	0.444576	0.0299142	0.0606738
					Pcnp	0.465221	8.89758e-05	0.000972282
					Cldnd1	0.372471	0.00686983	0.0239784
					Samsn1	0.422805	0.00127061	0.0075201
					Nrip1	0.399984	0.000315745	0.00263455
					Mir155hg	0.203166	0.0261457	0.0554376
					Usp16	0.406332	0.0133099	0.0365076
					Bach1	0.239632	5.37268e-05	0.000675396
					Scaf4	0.355541	0.0317225	0.0631321
					Paxbp1	0.492524	0.0143968	0.0380231
					Ifnar1	0.481929	0.000168143	0.00161512
					Mrps6	0.406332	0.00523155	0.0198923
					Slc5a3	0.277045	0.0369533	0.0702272
					Ttc3	0.492524	0.038501	0.0719911
					Ets2	0.248314	0.0111723	0.0325958
					Prdm15	0.152375	0.0184636	0.0448128
					B230307C23Rik	0.467282	0.0310148	0.0621101
					Tulp4	0.46653	0.0113402	0.0328244
					Tmem181a	0.335666	0.00642687	0.0229021
					Dynlt1a	0.270888	0.000335367	0.00276853
					Tagap1	0.0917525	0.00765745	0.0259296
					Fgfr1op	0.406332	0.0101929	0.0308531
					1600012H06Rik	0.449104	0.0417479	0.075342
					Lnpep	0.421961	0.000163708	0.00157701
					Zfp760	0.0451481	0.00407757	0.01669
					Srrm2	0.483624	5.4764e-09	2.96496e-07
					E4f1	0.304749	0.00694356	0.0241376
					Traf7	0.328936	0.00728826	0.0250535
					Metrn	0.290237	0.00596318	0.0219559
					Gm8186	0.465221	0.000300363	0.00253732
					Axin1	0.334627	0.0163504	0.0411645
					Luc7l	0.445975	0.010049	0.0307175
					AC127341.3	0.304749	0.0328169	0.0646617
					Hmga1	0.162533	0.00122296	0.00732915
					D17Wsu92e	0.406332	0.0104921	0.0314589
					Def6	0.395045	0.0108079	0.0320998
					Kctd20	0.433421	0.00626574	0.0225587
					Cdkn1a	0.498681	0.0422129	0.0759191
					Pi16	0.235935	0.0209539	0.0485803
					Pim1	0.306272	5.8504e-06	0.00011105
					Abcg1	0.180592	0.000222691	0.00199809
					Sik1	0.406332	0.00314784	0.0141888
					Zfp472	0.135444	0.0376847	0.0709378
					Daxx	0.317447	0.00120446	0.00726703
					Wdr46	0.487599	0.0392588	0.0728932
					H2-Eb1	0.352829	3.58786e-22	4.27349e-19
					H2-Eb2	0.250051	0.027819	0.0578022
					Neu1	0.451481	0.0329544	0.0648255
					Hspa1b	0.415378	1.00362e-05	0.000167776
					Hspa1a	0.368265	2.48215e-05	0.000353012
					Prrc2a	0.368534	0.000298686	0.00253212
					H2-Q6	0.406332	0.0106385	0.0318179
					H2-Q7	0.309367	4.84641e-05	0.000617384
					H2-Q10	0.316036	0.0491253	0.081665
					H2-T23	0.460683	1.36053e-11	1.581e-09
					Hsp90ab1	0.47019	1.11764e-09	6.91539e-08
					Mrpl14	0.499679	0.000111487	0.00114869
					Rrp36	0.203166	0.000544911	0.00396361
					Ubr2	0.370999	0.00589253	0.0218307
					A530064D06Rik	0.1219	0.00326865	0.0145747
					Trem1	0.0369393	0.00601922	0.0220769
					Plcl2	0.251539	0.00360451	0.0153745
					Kat2b	0.334627	0.0117747	0.0336932
					Pot1b	0.284433	0.0287806	0.0590025
					Tnfsf9	0.490285	0.028885	0.0591148
					Lpin2	0.304749	0.00496889	0.019169
					Emilin2	0.371304	0.00236417	0.0117648
					Smchd1	0.33861	8.03453e-06	0.000143409
					Ypel5	0.47049	0.00488273	0.0189749
					Birc6	0.434355	0.0001009	0.00108273
					Hnrnpll	0.406332	0.0038685	0.016097
					Eml4	0.406332	0.00495849	0.019169
					Mcfd2	0.335666	0.0103238	0.0310767
					Msh6	0.203166	0.00662026	0.0233295
					Foxn2	0.379244	0.00180267	0.00959622
					Gm47283	0.216489	3.95684e-10	2.85635e-08
					Map3k8	0.334627	0.0139194	0.0374777
					Epc1	0.317999	0.00204122	0.0105361
					Rbbp8	0.387863	0.0106076	0.0317455
					Impact	0.478038	0.0137293	0.0371911
					Trappc8	0.449104	0.0417479	0.075342
					Rnf138	0.487599	0.0267847	0.0563411
					Zfp397	0.290237	0.00324429	0.0144865
					Wdr33	0.328936	0.00559375	0.0209684
					Epb41l4aos	0.358529	0.0200698	0.0472899
					Srp19	0.482089	0.000702478	0.00479558
					Brd8	0.436431	0.0248958	0.0538829
					Kdm3b	0.395045	0.00144528	0.00824536
					Egr1	0.172094	0.00234211	0.0116723
					Gm5239	0.419877	0.00151592	0.00848698
					Matr3	0.455092	0.000229094	0.00202128
					Tmem173	0.386016	0.00204336	0.0105361
					Pfdn1	0.491876	0.00171678	0.00926321
					Cd14	0.379372	0.0109656	0.0322644
					Fem1c	0.33861	8.88596e-06	0.000153949
					Tmed7	0.419877	2.80774e-05	0.000393445
					Eif1a	0.476999	0.000704861	0.00480017
					Dtwd2	0.174142	0.0327821	0.06462
					Dmxl1	0.426649	0.0223917	0.0508739
					Srfbp1	0.237027	0.0259617	0.0551455
					Csnk1g3	0.487599	0.0170623	0.0424276
					Lmnb1	0.456343	0.00424608	0.0171684
					Isoc1	0.383758	0.0268637	0.0564574
					Dctn4	0.490401	0.0127108	0.0353733
					Slc26a2	0.216711	0.00763215	0.0258624
					Grpel2	0.406332	0.022096	0.0504184
					Malt1	0.259037	0.00108165	0.00671017
					Pmaip1	0.278017	0.00255065	0.012541
					Tubb6	0.470976	0.0441384	0.0772591
					Spire1	0.332454	0.0186197	0.0451457
					Gm17669	0.203166	0.00662026	0.0233295
					Rnmt	0.459332	0.0308931	0.0619212
					Smad4	0.363561	0.0182961	0.0445198
					Ier3ip1	0.485555	4.32226e-07	1.3372e-05
					Zfp236	0.270888	0.034614	0.0669567
					Chka	0.334627	0.0163504	0.0411645
					Ndufv1	0.438839	0.000676006	0.00465451
					Gstp1	0.174142	2.13787e-08	9.7006e-07
					Neat1	0.294873	1.01467e-07	3.99846e-06
					Zfpl1	0.358529	0.0146799	0.0384713
					Ppp1r14b	0.49945	0.00773029	0.0260907
					Stip1	0.490985	0.00109987	0.00678783
					Slc3a2	0.426523	0.000110573	0.00114525
					Stx5a	0.436807	0.00267902	0.0128835
					Ganab	0.46438	0.035836	0.0687069
					Pcna-ps2	0.128316	0.000293522	0.00250619
					Fen1	0.430234	0.026159	0.055441
					Ms4a4c	0.355389	7.40004e-05	0.000857826
					Fam111a	0.439638	0.00271579	0.012965
					Zfp91	0.381953	0.000406342	0.00317969
					Carnmt1	0.34382	0.00271282	0.0129638
					Gda	0.350923	0.0245099	0.053747
					1110059E24Rik	0.494666	0.0310395	0.0621101
					Abhd17b	0.313456	0.00358419	0.0153605
					Gm6563	0.108355	0.000519698	0.00382105
					Fam122a	0.334627	0.0263139	0.0555849
					Gm10053	0.0752468	7.9502e-06	0.000143409
					Cd274	0.270888	0.0286658	0.0589193
					Ermp1	0.243799	0.020027	0.0472593
					Cstf2t	0.304749	0.0101822	0.0308403
					Pten	0.438202	0.00023521	0.00206759
					Stambpl1	0.406332	0.014518	0.0382362
					Btaf1	0.348285	0.0223214	0.0507625
					Hells	0.346135	0.0485909	0.081096
					Exosc1	0.443272	0.0241534	0.0532021
					Slc25a28	0.33861	0.0273559	0.0571139
					Entpd7	0.406332	0.0372017	0.0705585
					Mgea5	0.375076	0.00461609	0.0181309
					Sfxn2	0.372471	0.0373028	0.0705817
					Borcs7	0.388666	0.0135193	0.0368064
					Add3	0.458426	0.00922611	0.0290911
					Smndc1	0.449868	0.00711916	0.0245964
					Dusp5	0.378784	0.00952018	0.0296456
					Zdhhc6	0.487599	0.0246094	0.0538826
					Rps12-ps3	0.387863	1.90699e-11	2.01903e-09

## Sheet: NK
Up					Down
Name	FC	pVal	Qval		Name	FC	pVal	Qval
Cr1l	2.14179	0.0013532	0.0522399		Gls	0.298507	0.000538016	0.0291673
Sord	3.64722	0.00407303	0.0913477		Mfsd6	0	0.000847496	0.038059
Txnip	2.09808	0.00514713	0.0999143		Hibch	0	0.00452366	0.0913477
Ubc	3.49401	6.17718e-08	3.37926e-05		Xrcc5	0	0.00452366	0.0913477
Rnf6	3.47187	0.00268755	0.0721992		Rnf25	0	0.00258131	0.0696561
Ypel3	2.23639	0.0025492	0.0696561		Dis3l2	0	0.00217347	0.0684769
Dhcr7	10.8657	0.00219319	0.0687382		1810006J02Rik	0	0.00258131	0.0696561
Tpm3-rs7	3.85763	2.34589e-05	0.00455376		Tnni1	0.172928	0.00311839	0.0804258
Hexb	3.64722	0.00407303	0.0913477		Rgs1	0.301946	0.00018326	0.0143219
Cyth4	2.28358	0.000917592	0.0394408		Sft2d2	0	0.000730972	0.0354734
Rnaset2b	12.5373	0.00356381	0.0874203		G0s2	0.0964409	2.4378e-05	0.00458429
Gm10093	3.27899	0.00462704	0.0928125		Arl5b	0	0.00452366	0.0913477
Gm9493	3.04962	6.18797e-05	0.00809495		Rabl6	0	0.000161232	0.0131112
					Snapc4	0	0.00452366	0.0913477
					Sh3glb2	0	0.000245945	0.0169074
					Fnbp1	0.308611	3.71711e-05	0.00545563
					Abl1	0	0.00452366	0.0913477
					Pbx3	0	0.0043571	0.0913477
					Rpl35	0.494063	8.30143e-10	8.32579e-07
					Ubr3	0	0.00452366	0.0913477
					Plekha3	0	0.00147743	0.0529201
					Timm10	0.278607	0.00407166	0.0913477
					Slc12a6	0	5.34843e-05	0.00729371
					Eif3j1	0.271077	0.000646925	0.0338517
					Esf1	0.147498	1.60851e-06	0.000509442
					Zfp120	0	0.00258131	0.0696561
					Itch	0.227951	0.000756012	0.0361062
					Uqcc1	0	0.00452366	0.0913477
					2900097C17Rik	0.151967	6.65236e-05	0.00814051
					Trp53rkb	0	0.00452366	0.0913477
					Znfx1	0	0.00258131	0.0696561
					Taf4	0	0.00452366	0.0913477
					Zbtb33	0	0.00258131	0.0696561
					Pin4	0.42434	0.00136294	0.0522399
					Smc1a	0.222886	0.000103196	0.0100057
					Skil	0.257176	0.00036927	0.0213666
					Atp11b	0.38157	0.00386554	0.089812
					4932438A13Rik	0.185738	0.000358354	0.0209362
					Foxo1	0.156716	0.00384545	0.0896914
					Pmvk	0	0.00126025	0.0502232
					Atp8b2	0.131972	0.000879885	0.0383681
					Rps27	0.488955	2.32897e-06	0.00070074
					Slc39a1	0	1.11479e-06	0.000419274
					Ints3	0	0.000280089	0.0171987
					S100a8	0	5.34843e-05	0.00729371
					Rfx5	0	0.00258131	0.0696561
					Setdb1	0	0.000486935	0.0268824
					Arnt	0	0.00452366	0.0913477
					Hipk1	0.167164	0.000252742	0.0169074
					Dennd2d	0	0.000486935	0.0268824
					Gbp5	0	0.0037506	0.0895622
					Hs2st1	0	0.000280089	0.0171987
					Orc3	0	0.0043571	0.0913477
					Nr4a3	0	0.00479777	0.0946594
					Cdc26	0.398915	0.00566404	0.1
					Pole3	0.113976	0.00105186	0.0431631
					Klhl9	0.139303	0.00144564	0.0529201
					Gnl2	0.147498	0.00356663	0.0874203
					Smim12	0.203308	0.000153034	0.0131112
					Zfp593	0	2.77333e-05	0.00476823
					C1qa	0	0.00147743	0.0529201
					H6pd	0	0.00452366	0.0913477
					Gm26825	0.480597	0.00326508	0.0829029
					A630072M18Rik	0	0.00101977	0.0423214
					Ccdc146	0.131972	0.000879885	0.0383681
					Cd38	0	0.000280089	0.0171987
					Qdpr	0	0.00452366	0.0913477
					Ube2k	0.472421	0.004994	0.0975712
					Pds5a	0.305788	0.000910495	0.0394173
					Cxcl2	0.0964409	5.47575e-15	1.15799e-11
					Baz1b	0.278607	0.00135163	0.0522399
					Pan3	0.175962	3.23295e-07	0.000149651
					Hsph1	0.25438	7.58929e-06	0.00169146
					Ndufa5	0.468427	0.00158514	0.0554578
					Tnpo3	0.200597	0.00208915	0.0676477
					Nrf1	0.156716	0.00384545	0.0896914
					Znrf2	0.208955	0.000102814	0.0100057
					Igkc	0	0.00165153	0.0571163
					Rpia	0.268657	0.00277605	0.0742452
					Tia1	0.250746	0.00157942	0.0554578
					Eefsec	0	4.78976e-05	0.00686259
					Ppp4r2	0.401194	0.00475314	0.0943979
					Itpr1	0	0.00452366	0.0913477
					Clec4e	0	0.00258131	0.0696561
					Atn1	0	0.00258131	0.0696561
					Nop2	0	0.000161232	0.0131112
					Klra1	0.414904	5.0134e-06	0.00123954
					Ybx3	0.385763	0.00203028	0.0663992
					Med21	0.334328	3.63119e-05	0.00545563
					Mrps35	0.119403	0.000525162	0.0287293
					Gm45509	0.139303	0.00323011	0.0823626
					Med29	0	9.28533e-05	0.00977998
					Aldh16a1	0	0.0043571	0.0913477
					Sema4b	0	0.000847496	0.038059
					Tmem126b	0.147498	0.00236387	0.0696561
					Rab6a	0.278607	0.00331343	0.083777
					Smg1	0.289323	0.00592879	0.1
					Dcun1d3	0	0.000847496	0.038059
					Eef2k	0.156716	0.00384545	0.0896914
					Sbk1	0	0.000486935	0.0268824
					Gm42715	0	0.00147743	0.0529201
					Ipcef1	0.268657	0.00485485	0.0954725
					Epb41l2	0	0.00217347	0.0684769
					Rev3l	0	0.00452366	0.0913477
					Egr2	0	0.000554686	0.0298025
					Mcm3ap	0	0.0037506	0.0895622
					Gadd45b	0.278607	0.0035079	0.086872
					Polr3b	0	0.00452366	0.0913477
					Bag4	0	0.00147743	0.0529201
					Myo9b	0.167164	0.000129138	0.0115986
					Nacc1	0	0.00258131	0.0696561
					Gm10073	0	8.31756e-08	4.17099e-05
					Zfpm1	0	3.08066e-05	0.00514951
					Cdt1	0	0.00452366	0.0913477
					Gnpat	0	0.00258131	0.0696561
					Ppp3cb	0.268657	0.00339341	0.0850842
					Vcl	0	0.00258131	0.0696561
					Zmym2	0	6.3261e-05	0.00809958
					Spry2	0.269397	5.14965e-06	0.00123954
					Olfr77	0.104478	0.000118764	0.0108284
					Icam1	0.320102	2.58231e-05	0.00459822
					Nfrkb	0.139303	0.0022273	0.0689511
					Thy1	0.3634	0.00531557	0.1
					Ddx6	0.278607	6.77257e-05	0.00814051
					Commd4	0.339995	0.000160344	0.0131112
					Arih1	0.358209	0.00521528	0.1
					Dennd4a	0.39974	0.00195725	0.0650717
					Mapk6	0	0.00452366	0.0913477
					Plod2	0	0.00452366	0.0913477
					Tfdp2	0	0.00258131	0.0696561
					Rasa2	0.161772	8.11338e-05	0.00904133
					Cdv3	0.41791	0.00184501	0.0630827
					Ss18l2	0.289323	0.00592879	0.1
					Purb	0.300896	0.000278894	0.0171987
					Gm12166	0.147498	0.00236387	0.0696561
					Med7	0	0.000280089	0.0171987
					Cnot6	0.289323	0.00592879	0.1
					Hnrnph1	0.313433	7.45894e-05	0.00857634
					Tcf7	0	0.00101977	0.0423214
					Stx8	0.227951	0.00112913	0.0458586
					Ankfy1	0	0.000245945	0.0169074
					Myo1c	0	0.00452366	0.0913477
					Taok1	0.161772	5.45428e-05	0.00729371
					Ccl3	0.349298	0.000660409	0.0342593
					Ddx52	0.208955	0.00187162	0.063631
					Med13	0	0.000847496	0.038059
					Bptf	0.363987	0.00146439	0.0529201
					Fam104a	0.319132	0.000179869	0.0142418
					Gm32036	0.200597	0.00121663	0.0488081
					Fars2	0	0.00258131	0.0696561
					Ndufs6	0.467493	0.000210534	0.0158364
					Hmgcr	0	9.28533e-05	0.00977998
					Gm10260	0.355789	5.45828e-17	3.28458e-13
					Erbin	0.208955	7.5536e-05	0.00857634
					Ndufs4	0.43097	0.00300533	0.0782355
					Rab10os	0.289323	0.00592879	0.1
					Pum2	0.241102	3.31629e-05	0.00525162
					Ahr	0	0.00258131	0.0696561
					Strn3	0.21804	0.00369099	0.0895601
					Nfkbia	0.363678	0.000190683	0.014711
					Ddx24	0.424994	0.00337183	0.084897
					Gm28875	0.143284	2.96016e-09	1.97923e-06
					Traf3	0	0.00452366	0.0913477
					Mta1	0	0.00258131	0.0696561
					Ly6a	0.0504858	8.99115e-14	1.0821e-10
					Ankrd54	0	0.000280089	0.0171987
					Micall1	0	0.0037506	0.0895622
					Ddx17	0.433389	0.000601122	0.0317308
					Hdac7	0	0.00014262	0.0124382
					Senp1	0.208955	0.00312743	0.0804258
					Kansl2	0.289323	0.00592879	0.1
					Larp4	0.227951	0.00552106	0.1
					Dnm1l	0.147498	0.00236387	0.0696561
					Crkl	0	0.000730972	0.0354734
					Eif4g1	0.459701	0.00575938	0.1
					Dlg1	0	0.000161232	0.0131112
					Pak2	0.484636	0.000413594	0.0237033
					Dtx3l	0	0.000847496	0.038059
					Zbtb20	0.424994	0.00350376	0.086872
					Cmss1	0	0.00452366	0.0913477
					Runx1	0.366946	0.0027938	0.0743894
					Qk	0.119403	0.000321744	0.0193613
					Igf2r	0.185738	0.000688464	0.0354094
					Lnpep	0.465672	0.00378228	0.0896855
					Rnps1	0.297496	9.58884e-05	0.00977998
					Cramp1l	0.278607	0.00492251	0.0964878
					Gm8186	0.444872	0.00391914	0.090707
					Bnip1	0	0.00452366	0.0913477
					Itpr3	0	0.00452366	0.0913477
					Uqcc2	0.477612	0.00223435	0.0689511
					Nudt3	0	0.000730972	0.0354734
					Abcg1	0.147498	0.00236387	0.0696561
					Skiv2l	0.238806	0.00508121	0.0989539
					H2-Q6	0.347187	0.000335963	0.0200168
					H2-Q7	0.262879	2.93724e-09	1.97923e-06
					Gm42418	0.464345	0.000103966	0.0100057
					Bicral	0	0.00147743	0.0529201
					Ubr2	0.10902	0.000115827	0.0107231
					Fem1a	0	0.000280089	0.0171987
					Tnfsf14	0.200597	0.00479747	0.0946594
					Rab12	0	0.00452366	0.0913477
					Emilin2	0.21804	0.00573493	0.1
					Smchd1	0.358209	0.00454776	0.0915272
					Crim1	0.125373	0.000854352	0.0380826
					Rhoq	0	9.28533e-05	0.00977998
					Gm47283	0.230571	4.31633e-08	2.5974e-05
					Wdr36	0	0.00217347	0.0684769
					Egr1	0.0545101	2.59804e-05	0.00459822
					Cd14	0	6.39491e-07	0.000256547
					Ik	0.303935	0.0028143	0.0746051
					Arhgap26	0	0.000245945	0.0169074
					Dmxl1	0	0.000245945	0.0169074
					Gramd3	0	0.00452366	0.0913477
					Malt1	0.329929	0.00291117	0.0761664
					Nfatc1	0.221247	0.00077793	0.0368605
					Kmt5b	0	0.000486935	0.0268824
					Gstp1	0.0325645	5.77301e-15	1.15799e-11
					Hnrnpul2	0.401194	0.00357375	0.0874203
					Pcna-ps2	0	0.00147743	0.0529201
					Pi4k2a	0	0.00258131	0.0696561
					Gbf1	0.156716	0.00384545	0.0896914
					4833407H14Rik	0	0.00452366	0.0913477

## Sheet: ILC1
Up					Down
Name	FC	pVal	Qval		Name	FC	pVal	Qval
Lypd1	3.01147	0.0381974	0.0956271		Arfgef1	0.476929	1.1511e-06	1.61583e-05
Cfap77	4.16972	0.0417116	0.1		Coa5	0.487687	0.00016366	0.00131207
Wdsub1	12.9725	0.000878769	0.00532467		Mgat4a	0.496661	1.32684e-05	0.00014397
Kbtbd4	2.05177	0.0253229	0.0716792		Tsga10	0.444771	0.0291694	0.0792207
Gm10800	3.64851	7.00407e-07	1.04743e-05		Il1r2	0.356387	0.0434852	0.1
Ubox5	Inf	0.00810217	0.0310915		Nck2	0.441241	0.0299523	0.0806355
Atp9a	2.54817	0.0162914	0.052517		Stat1	0.477485	2.53979e-09	5.97527e-08
Gm20721	6.71789	1.84366e-05	0.000192845		Gls	0.379651	5.30742e-10	1.38486e-08
Slco4a1	4.63303	0.025229	0.0716183		Rftn2	0	0.0454555	0.1
B630019K06Rik	2.77982	0.00738713	0.0289507		Mars2	0.123547	0.0012546	0.00712389
Renbp	4.63303	0.025229	0.0716183		Kctd18	0.463303	0.00434638	0.0193538
Maged2	3.33578	0.0127665	0.0441623		Trak2	0.406802	0.00128347	0.00727146
Car3	Inf	0.0454588	0.1		G730003C15Rik	0.168474	0.0101356	0.0369779
Spata5	2.66399	0.0110098	0.0395935		Abi2	0.416972	0.0315408	0.0836956
Cd1d1	2.19459	0.00335988	0.0158093		Raph1	0.397117	1.68012e-06	2.25771e-05
Pdzk1	Inf	0.00463821	0.0202794		Creb1	0.437564	2.59129e-06	3.34522e-05
Dennd2c	Inf	0.0252912	0.0716183		Pikfyve	0.463303	0.0246679	0.0713767
Tspan5	5.25076	0.00359536	0.0165968		Ikzf2	0.406456	1.45588e-15	5.81738e-14
Cd72	6.02294	0.0054926	0.0231217		Usp37	0.408148	3.14867e-06	3.96977e-05
Slc31a2	2.08486	0.013523	0.046086		Glb1l	0	0.0454555	0.1
Junos	Inf	0.0454588	0.1		Rhbdd1	0.448358	0.00915358	0.0342728
Itgb3bp	4.16972	0.00389217	0.0176752		Agfg1	0.422018	6.51331e-07	9.79858e-06
Mmachc	7.41284	0.0220595	0.0656911		Sp110	0	9.29883e-10	2.34084e-08
Gm13012	3.30931	0.00229483	0.0115769		Sp140	0.350607	0.000675937	0.00428607
Arhgef16	Inf	0.0195734	0.0599428		Per2	0	0.000302629	0.00218617
C1qtnf12	2.08486	0.0355979	0.0911713		St8sia4	0.499447	3.74284e-11	1.12167e-09
Rundc3b	5.55963	0.00914937	0.0342728		Gin1	0.264744	9.28707e-09	2.00964e-07
6030443J06Rik	Inf	0.0454588	0.1		Zcchc2	0.450781	0.00626941	0.0255653
Pkd2	Inf	0.0454588	0.1		Phlpp1	0.168474	0.0101356	0.0369779
Gbp8	8.33945	1.98536e-08	3.94567e-07		Steap3	0	0.0252867	0.0716183
Gm14508	Inf	0.0454588	0.1		Ccdc93	0.403905	0.00161273	0.00878747
Hvcn1	8.28154	5.3158e-21	2.76863e-19		Cxcr4	0.413409	0.000178018	0.00140481
Tctn1	3.39755	0.0409555	0.1		Elk4	0.463303	4.40786e-08	8.23971e-07
Ubc	2.5193	7.62094e-41	6.77103e-39		Dstyk	0.292612	0.00597874	0.0246461
Bri3bp	3.57405	0.000959422	0.0057052		Klhl12	0.358686	0.00230928	0.0116307
Aacs	2.47095	0.0143392	0.0479453		2310009B15Rik	0.473598	0.00651282	0.0263567
Trbv13-3	Inf	0.01425	0.047727		Cdc73	0.375651	4.42418e-06	5.40641e-05
Prss2	4.67715	2.06281e-05	0.000213696		Trove2	0.333578	0.00442725	0.0195984
Lrrc61	2.70854	0.000893002	0.00536285		Rgs1	0.305514	6.04928e-29	4.15313e-27
Pde1c	8.33945	0.0128309	0.0443477		Ptgs2	0	0.00089333	0.00536285
Ndnf	9.26606	0.00747996	0.0292386		Edem3	0.223663	0.000284151	0.00207536
Cd8b1	Inf	0.01425	0.047727		Cep350	0.463303	0.00186248	0.00986366
St3gal5	Inf	0.0252912	0.0716183		Gm2000	0.486989	1.2348e-19	5.97776e-18
Gm20594	4.01529	0.0159162	0.0516322		Gm10031	0.205912	0.0287136	0.078377
Ret	7.41284	0.0220595	0.0656911		Suco	0.421184	1.63759e-06	2.20835e-05
Slc6a13	2.20069	0.0128572	0.0444181		Sell	0.463303	0.0440501	0.1
Clstn3	Inf	0.0454588	0.1		Sft2d2	0.45545	0.000414535	0.00285377
Gm20531	Inf	0.0454588	0.1		Fam78b	0.252711	0.0368492	0.0935063
Klra9	2.7219	6.00849e-07	9.11173e-06		Uhmk1	0.483446	3.38303e-05	0.000327549
Klra3	2.13119	0.00971237	0.0358496		Pigm	0.49419	0.0300673	0.0806355
Plbd1	2.77982	0.0205567	0.0623408		Ifi206	0.243844	0.00771169	0.0299773
Eps8	Inf	0.00463821	0.0202794		Ifi214	0.215105	1.16523e-07	2.02762e-06
Gm15706	Inf	0.0252912	0.0716183		Ifi209	0.452003	0.00393164	0.017833
C5ar1	Inf	0.01425	0.047727		Ifi208	0.353795	1.57984e-08	3.24212e-07
Gm16251	Inf	0.0252912	0.0716183		Zbtb18	0.154434	0.0103151	0.0374882
Kcnn4	3.24312	0.0326247	0.0857882		Lin9	0.126355	0.0001797	0.0014166
Xrcc1	2.10268	0.00186633	0.00987155		Flvcr1	0.397117	0.021627	0.0648641
Aplp1	7.41284	0.0220595	0.0656911		Ints7	0.381543	0.00269339	0.0132254
Ffar2	4.63303	0.025229	0.0716183		Diexf	0.341381	0.0155435	0.0506846
Scn1b	6.17737	1.34054e-06	1.85418e-05		G0s2	0.106174	4.52722e-17	1.9537e-15
Gm12758	7.41284	0.0220595	0.0656911		Sec61a2	0.446143	0.0174066	0.0548982
Gm31597	2.36799	0.0248626	0.0716183		Pfkfb3	0.416972	0.0259215	0.0728276
Tjp1	4.16972	0.0417116	0.1		Arl5b	0.498941	0.0331806	0.0866763
Igf1r	3.33578	0.0171138	0.0544187		Arhgap21	0.231651	0.00511121	0.0218822
Det1	2.13832	0.0194656	0.0597595		Il1rn	0.119562	2.78193e-06	3.54887e-05
Fah	6.48624	0.0380242	0.0953706		Camsap1	0.138991	0.000271082	0.00199729
Tpbgl	2.51507	0.0332163	0.0866796		Nacc2	0	0.0338395	0.0878204
Lrrc51	Inf	0.00810217	0.0310915		Notch1	0.49419	0.00170491	0.00917705
Dkk3	Inf	0.0454588	0.1		Lcn4	0.132372	0.0300643	0.0806355
Gga2	3.39755	0.0409555	0.1		Tsc1	0.489042	0.0114014	0.0404243
Cdiptos	6.48624	0.0380242	0.0953706		Setx	0.463303	0.000226323	0.00172472
Qprt	6.02294	0.00013593	0.00111581		Rapgef1	0.489777	0.000553364	0.0036371
Gm45184	4.16972	0.0417116	0.1		Slc27a4	0.296514	0.0017061	0.00917705
Setd1a	2.05177	0.0224795	0.0666011		Sptan1	0.387881	2.71406e-06	3.48583e-05
Itgax	2.93066	2.74407e-09	6.41591e-08		Wdr34	0.0842369	0.00337366	0.0158446
Htra1	7.78349	2.74577e-06	3.51461e-05		Nup188	0.496396	0.0260963	0.0731825
Paox	7.41284	0.0220595	0.0656911		Abl1	0.478248	0.0190641	0.0587406
Plekhg1	Inf	0.0252912	0.0716183		Rpl12	0.472647	3.34841e-70	5.16069e-68
B230208H11Rik	6.48624	0.0380242	0.0953706		Rpl35	0.330102	3.50724e-133	8.82895e-130
Adat2	3.24312	0.00578048	0.024039		Acvr2a	0.115826	0.00074376	0.00464977
Gm47512	6.48624	0.0380242	0.0953706		Arl5a	0.349156	3.44531e-06	4.28652e-05
Dna2	Inf	0.01425	0.047727		Ttc21b	0.324312	0.00771115	0.0299773
Adarb1	Inf	0.0454588	0.1		Fastkd1	0.252711	0.0252919	0.0716183
Matk	6.48624	0.00329232	0.0155788		Ubr3	0.362585	0.000300528	0.00217603
Tjp3	Inf	0.0454588	0.1		Tlk1	0.49805	0.000496905	0.00330922
Gm48551	9.26606	0.00747996	0.0292386		Cdca7	0.185321	0.0170679	0.0543412
Gm28592	Inf	0.0454588	0.1		Sp3os	0.386086	0.014251	0.047727
Erbb3	6.48624	0.0380242	0.0953706		Plekha3	0.485365	0.00659024	0.0265723
Slc25a15	Inf	0.01425	0.047727		Itga4	0.255615	1.64046e-06	2.20835e-05
Palld	Inf	0.0454588	0.1		Ssfa2	0.347477	0.0226045	0.066762
Arrdc2	3.24312	0.0245019	0.0710054		Itgav	0.449263	0.00980167	0.0361547
B3gnt9	Inf	0.0252912	0.0716183		Tnks1bp1	0.356387	0.000666563	0.00424087
Elmo3	6.48624	0.00329232	0.0155788		Celf1	0.450504	1.70147e-09	4.13171e-08
Tppp3	Inf	0.0454588	0.1		Hipk3	0.397117	0.000249349	0.00186815
Gm38250	Inf	0.0454588	0.1		Slc12a6	0.395352	8.53456e-06	9.6777e-05
Nrp1	6.48624	0.0380242	0.0953706		Inafm2	0.324312	0.00771115	0.0299773
Arhgap22	Inf	0.0454588	0.1		Ttbk2	0.25739	0.00645854	0.026167
Gm7324	2.39827	0.00137257	0.00768968		Zscan29	0.370642	0.00117062	0.00673823
Ear2	Inf	0.0454588	0.1		Eif3j1	0.359847	4.01125e-08	7.5544e-07
Tpm3-rs7	4.05194	9.48241e-26	6.12065e-24		Trpm7	0.473832	4.7464e-05	0.000440357
Gm26870	2.25033	0.0116052	0.0409545		Itpripl1	0.47892	9.22e-05	0.000797593
Gm26733	7.10398	0.000113781	0.000946859		Anapc1	0.463303	0.0019383	0.0101583
Ap1m2	Inf	0.01425	0.047727		Il1a	0	0.0454555	0.1
Hyls1	Inf	0.01425	0.047727		Il1b	0.299579	1.15177e-11	3.70139e-10
Cxcr5	Inf	0.0454588	0.1		Atrn	0.35429	0.00157923	0.00864861
Cryab	Inf	0.0252912	0.0716183		Rnf24	0.115826	0.0173094	0.0547586
Snx33	2.77982	0.0346485	0.0891844		Mcm8	0.132372	0.0300643	0.0806355
Lca5	Inf	0.0252912	0.0716183		Jag1	0.0882481	0.000110008	0.00091901
Ube2cbp	Inf	0.0454588	0.1		Tasp1	0.303805	1.8838e-06	2.49152e-05
Dbr1	3.01147	0.00326151	0.0154718		Gzf1	0.320748	0.00724732	0.0284618
Mon1a	2.36799	0.0248626	0.0716183		Gins1	0.102956	0.0189026	0.0583144
Gm37401	Inf	0.01425	0.047727		Plagl2	0.392025	0.00746147	0.0292216
Slc26a6	Inf	0.0454588	0.1		Kif3b	0.386086	0.00214429	0.0109873
Rnf215	3.1659	0.000446103	0.00304061		E2f1	0.0926606	0.0112741	0.0402106
Rhbdf1	Inf	0.0454588	0.1		Ncoa6	0.463303	0.0139992	0.0473031
Trim16	2.62538	0.0309126	0.0824634		Slpi	0	0.00089333	0.00536285
Fbxw10	4.32416	0.00984331	0.0362797		Gm14302	0.252711	0.0252919	0.0716183
Zmynd15	Inf	0.0454588	0.1		Neurl2	0	0.0454555	0.1
Itgae	Inf	0.00463821	0.0202794		Ncoa5	0.498941	0.0331806	0.0866763
Hic1	2.51507	0.0332163	0.0866796		Zfp217	0.423591	0.00578054	0.024039
Abhd15	4.63303	0.025229	0.0716183		Pmepa1	0.443159	0.00205419	0.0106605
Sarm1	Inf	0.0454588	0.1		Gm14391	0	0.0080983	0.0310915
2023-09-04	2.04829	0.00748562	0.0292456		Zfp971	0.247095	0.00828106	0.0316333
Epop	2.26504	0.0301045	0.0807065		Phactr3	0.336947	0.0205588	0.0623408
Zpbp2	Inf	0.0252912	0.0716183		Taf4	0.32946	0.000142335	0.00116207
Jup	2.96514	0.022675	0.0668656		Lsm14b	0.27377	4.42757e-05	0.000412805
Taco1	2.96514	0.0292392	0.0793668		B230312C02Rik	0	0.0454555	0.1
Abca5	6.48624	0.0380242	0.0953706		Uckl1os	0.308869	0.0342153	0.0883101
Hmga1b	4.63303	0.025229	0.0716183		Zfp512b	0.347477	0.0226045	0.066762
Akr1c13	2.29445	0.00124428	0.00708664		Kdm6a	0.384629	1.79929e-07	3.03311e-06
Akr1c12	6.48624	0.0380242	0.0953706		Zfp182	0.421184	0.00980461	0.0361547
Gm47802	7.41284	0.0220595	0.0656911		Dock11	0.482769	5.39029e-06	6.42078e-05
Actn2	7.41284	0.0220595	0.0656911		Xiap	0.457438	1.16377e-08	2.46185e-07
Gm47882	3.24312	0.0245019	0.0710054		Zdhhc9	0.198558	0.00568914	0.0237374
Gm46404	Inf	0.0454588	0.1		Elf4	0.46948	0.000153989	0.0012398
Gm30918	2.3827	0.0401532	0.099586		Xlr	0.231651	0.0108457	0.0390592
Gm31600	Inf	0.0454588	0.1		Ints6l	0.40539	0.00378458	0.0172489
Prr7	2.64744	0.0183858	0.0569528		Atp11c	0.446143	0.0203429	0.0618232
Slc28a3	6.48624	0.0380242	0.0953706		Ids	0.25739	7.67285e-05	0.000680913
Zfp759	Inf	0.0252912	0.0716183		Xlr3b	0.0463303	6.23335e-05	0.000560412
Ftl1-ps1	2.14078	0.000491119	0.00328226		L1cam	0.277982	0.000532682	0.00352263
Cenph	Inf	0.0454588	0.1		Flna	0.472212	1.0218e-05	0.000112982
Klf11	2.96514	0.022675	0.0668656		Rpl10	0.392677	3.63202e-20	1.82861e-18
Pygl	2.62538	0.0382024	0.0956271		Tab3	0.185321	0.0275574	0.0763444
Tgfb3	Inf	0.0454588	0.1		Pola1	0.277982	0.00721859	0.0283638
Ift43	3.33578	0.0133388	0.045606		Zxdb	0.364024	0.00652152	0.0263567
Gm26764	Inf	0.0252912	0.0716183		Chic1	0.444771	0.0220892	0.0656911
Laptm4b	9.72936	8.92271e-05	0.000777218		Xist	0.46706	3.71156e-85	1.03814e-82
Klf10	2.0314	1.93847e-05	0.000202482		Abcb7	0.447327	0.01158	0.0409157
2010109I03Rik	Inf	0.0252912	0.0716183		Atp7a	0.231651	0.00511121	0.0218822
Tnfrsf13c	2.2586	0.00690579	0.0274778		Gpr174	0.49419	8.22434e-05	0.000722216
Arhgap8	Inf	0.0252912	0.0716183		Hmgn5	0.49964	0.000105291	0.000888452
Wnt10b	4.16972	0.00782939	0.0303532		Chm	0.437564	0.00563434	0.0235608
Gm9961	Inf	0.0454588	0.1		Rpl36a	0.39036	1.26153e-88	4.33052e-86
Lsamp	2.45752	0.000513238	0.00340897		Kir3dl2	0.285109	0.0214431	0.064492
Bace2	Inf	0.00463821	0.0202794		Tmsb15b1	0	0.00660648	0.026581
Rnaset2b	9.83627	6.94895e-24	4.16498e-22		Gm15013	0.213832	0.000226551	0.00172472
Airn	Inf	0.0454588	0.1		Gnl3l	0.497621	0.00188371	0.00995335
Smoc2	Inf	0.00463821	0.0202794		Kctd12b	0.213832	0.0145122	0.0483656
Gm3435	Inf	0.00154269	0.00848988		Mbtps2	0.441241	0.002801	0.0136915
Fahd1	4.63303	0.0379854	0.0953706		Rps6ka3	0.413824	9.05701e-07	1.31537e-05
Zfp523	Inf	0.00225401	0.0114321		Gm21887	0	0.0026669	0.0131301
Ly6g5b	15.5979	2.58683e-18	1.19121e-16		Zbtb10	0.185321	0.0259356	0.0728401
H2-Q2	3.33578	0.00949496	0.0352539		Ythdf3	0.496396	9.66803e-05	0.000830642
Gm8909	3.33578	0.00949496	0.0352539		Fndc3b	0.292612	0.00827841	0.0316333
Gm20478	10.1927	0.00436906	0.0194205		Eif5a2	0.277982	0.0412589	0.1
AY036118	4.46455	2.57436e-13	9.34697e-12		Phc3	0.493056	1.94836e-05	0.000203233
Gm11110	2.67686	0.00850527	0.0323315		Pik3ca	0.463303	0.000349432	0.00246398
Gm10093	2.33858	2.4792e-06	3.2115e-05		4932438A13Rik	0.434792	5.40088e-08	9.97255e-07
B4galt6	3.89174	0.00245967	0.0122854		Cetn4	0	0.0252867	0.0716183
1700066B19Rik	4.01529	0.0159162	0.0516322		Bbs12	0.356387	0.0434852	0.1
Fchsd1	3.01147	0.0381974	0.0956271		Ankrd50	0.347477	0.0226045	0.066762
Smad2	3.5906	0.000384616	0.00266725		Setd7	0.406406	0.000177606	0.00140303
1810055G02Rik	Inf	0.01425	0.047727		Mgst2	0.463303	0.0286162	0.078377
Ap5b1	2.10031	0.013953	0.0471895		Pfn2	0	0.0454555	0.1
Ms4a8a	6.48624	0.0380242	0.0953706		Trim59	0.25945	0.001184	0.00678422
Mamdc2	Inf	0.0454588	0.1		Tmem131l	0.385218	9.15226e-07	1.32411e-05
Ptar1	11.1193	0.00255629	0.0126758		Gm6525	0.406406	0.000218084	0.00166868
Insl6	2.02168	0.0441713	0.1		Tmem154	0.370642	0.0022676	0.0114797
4833407H14Rik	4.16972	0.0417116	0.1		Gm15417	0.308869	0.00888258	0.0335409
Fam45a	2.58677	3.23172e-05	0.000315733		Pmvk	0.463303	0.0284943	0.0782512
					Atp8b2	0.386086	0.00169078	0.00912611
					Rps27	0.464417	4.77201e-46	4.87007e-44
					Slc39a1	0.489042	5.88721e-05	0.000533099
					S100a8	0.207449	1.78422e-05	0.000186887
					S100a9	0.237912	2.22911e-05	0.000227491
					Snx27	0.475824	0.00720449	0.0283231
					Rfx5	0.434346	0.00762136	0.0296991
					Setdb1	0.294829	0.0031875	0.0151875
					Mcl1	0.481221	9.94473e-09	2.13361e-07
					Hist2h2ab	0.115826	0.0316469	0.0838593
					Hist2h2ac	0.264744	0.000442469	0.00301856
					Hist2h2aa1	0.102956	0.0100051	0.0366971
					Gm15441	0	0.0252867	0.0716183
					Notch2	0.452219	5.65081e-10	1.46148e-08
					Hipk1	0.429207	1.07166e-12	3.74685e-11
					Fam19a3	0.362585	0.00959658	0.0355613
					Fam212b	0	0.0113542	0.0403165
					AI504432	0.427664	0.00021181	0.00162727
					Slc35a3	0.350607	0.000521472	0.00345758
					Ptbp2	0.498941	0.0143079	0.0478962
					Usp53	0.492259	0.0162063	0.052371
					Mettl14	0.386086	0.0113254	0.0403026
					Sgms2	0	0.0454555	0.1
					Ints12	0.447327	0.0137328	0.0466955
					Tet2	0.463303	0.000621081	0.00399526
					Trmt10a	0.463303	0.0362019	0.0923019
					Gbp5	0.308869	0.00253813	0.0126023
					Usp33	0.463303	0.0075574	0.0294651
					Gm33466	0	0.0454555	0.1
					Plag1	0	0.0454555	0.1
					Impad1	0.277982	0.000174283	0.00138291
					Trp53inp1	0.493056	1.3886e-05	0.000149691
					Dpy19l4	0.324312	0.0102767	0.0374024
					Rbm12b2	0.480462	0.02355	0.0688278
					Nbn	0.438918	0.0381184	0.0955117
					Cpne3	0.469023	4.4801e-08	8.35407e-07
					Bach2	0.308869	0.00192745	0.0101225
					Gm6297	0.43021	0.0121878	0.0425927
					B4galt1	0.391045	4.00667e-19	1.89116e-17
					Rnf38	0.399712	0.000246201	0.00185192
					Tgfbr1	0.471431	1.05637e-05	0.000116634
					Nr4a3	0.201436	0.00252938	0.0125754
					Abca1	0.205912	0.000221544	0.00169343
					Fsd1l	0	0.0454555	0.1
					AI314180	0.447686	2.31612e-05	0.000234362
					Ptgr1	0.365026	0.00224623	0.0114157
					Ugcg	0.456698	5.35439e-20	2.64291e-18
					Snx30	0.360347	0.0289166	0.0786952
					Cdk5rap2	0.443159	0.00205419	0.0106605
					Haus6	0.463303	0.0340397	0.0881281
					Dennd4c	0.367447	2.28386e-05	0.000232194
					Jun	0.423016	5.90287e-06	7.00925e-05
					Patj	0.352993	0.0150899	0.0497206
					Alg6	0.411825	0.0328409	0.0861339
					Ttc4	0.42404	0.000313893	0.00224696
					Zyg11b	0.28396	4.60883e-07	7.11782e-06
					Btf3l4	0.185321	0.0275574	0.0763444
					Szt2	0.198558	0.000138479	0.00113182
					Ago3	0.224632	9.85414e-05	0.000841843
					Marcksl1	0.393807	0.00181411	0.00966848
					Phactr4	0.347477	0.00665037	0.0267008
					Arid1a	0.42454	1.08389e-13	4.03232e-12
					Zfp593	0.455175	0.00061246	0.0039499
					C1qb	0.487687	0.00919708	0.0344016
					C1qc	0.308869	0.000737465	0.00462188
					C1qa	0.386086	0.000578481	0.00376614
					Zbtb40	0.28079	0.000393033	0.00271317
					Rcc2	0.477632	3.25376e-05	0.000317475
					Zbtb17	0.496396	0.0299089	0.0806355
					Gm16503	0	0.0454555	0.1
					Gm20707	0.205912	0.0287136	0.078377
					Pank4	0.438918	0.0381184	0.0955117
					Vwa1	0.132372	0.0300643	0.0806355
					Isg15	0.210592	2.32371e-05	0.000234609
					Fam133b	0.499936	4.00899e-09	9.09193e-08
					Ankib1	0.399712	0.00069429	0.00438404
					Cdk14	0.195762	7.69506e-09	1.68445e-07
					Phtf2	0.463303	0.00645151	0.0261665
					Ccdc146	0.137275	3.86818e-05	0.000367455
					Fam126a	0.447327	0.000580571	0.00376675
					Gm10062	0	0.0454555	0.1
					Cad	0.379066	0.0147067	0.0488056
					Krtcap3	0.463303	0.0110087	0.0395935
					Gm43660	0	0.0454555	0.1
					Fosl2	0.470898	0.000680802	0.00430968
					Nsd2	0.423016	0.00110987	0.00642281
					Gm42846	0	0.0454555	0.1
					Tada2b	0.397117	0.0174754	0.0548982
					Slc2a9	0	0.0454555	0.1
					Gm16223	0.132372	0.0300643	0.0806355
					Klhl5	0.386086	0.0116764	0.0411483
					Wdr19	0	0.0252867	0.0716183
					Rpl9	0.293605	1.38379e-71	2.34064e-69
					Gm42726	0.470898	0.00059132	0.0038332
					Pds5a	0.477133	8.14035e-07	1.19372e-05
					Atp8a1	0.422423	0.000106146	0.000892676
					Clock	0.454879	0.000897588	0.00538414
					Uba6	0.417881	0.000570925	0.00372015
					Ankrd17	0.447756	2.79169e-08	5.37832e-07
					Pf4	0.142555	0.00356811	0.016547
					Cxcl2	0.125556	3.70015e-41	3.36671e-39
					Cdkl2	0.132372	0.0300643	0.0806355
					Aff1	0.171594	0.000142511	0.00116225
					Gak	0.450066	0.000126499	0.00104066
					2900026A02Rik	0.411825	6.19477e-08	1.13552e-06
					Wscd2	0.205912	0.0287136	0.078377
					Ssh1	0.463303	0.00548688	0.0231217
					Tchp	0.441241	0.0357351	0.0913896
					Oasl1	0	0.0252867	0.0716183
					Cit	0	0.0080983	0.0310915
					Oas1c	0.277982	0.0412589	0.1
					Oas1a	0.25739	0.00444904	0.0196603
					Hectd4	0.105898	7.0322e-07	1.04956e-05
					Atxn2	0.451423	0.0035936	0.0165968
					Pptc7	0.410137	0.000209345	0.0016116
					Kdm2b	0.428728	9.16592e-05	0.000795339
					AI480526	0.463303	0.0202628	0.0617188
					Mlxip	0.409845	0.000283605	0.00207536
					Hcar2	0.102956	0.000880911	0.00532769
					Rabgef1	0.252711	0.00220296	0.0112487
					Ccl24	0	0.0252867	0.0716183
					Trim56	0.473832	9.65117e-05	0.000830138
					Slc12a9	0.402872	0.013885	0.0470014
					Pvrig	0.484362	0.00522508	0.0223317
					Adap1	0.132372	0.00211599	0.0108732
					Ints1	0.449263	0.0129849	0.0448167
					Foxk1	0.437564	0.00550587	0.0231344
					Fbxl18	0.397117	0.0174754	0.0548982
					Usp42	0.421184	0.00532028	0.0226361
					Ankrd61	0.308869	0.000556672	0.00365566
					Lmtk2	0.330931	0.0369646	0.0936459
					Rpl21	0.467285	1.89985e-16	8.10608e-15
					Pan3	0.320369	3.50331e-16	1.44575e-14
					Gm42788	0	0.000519348	0.00344652
					Alox5ap	0.402872	0.013885	0.0470014
					Hsph1	0.451423	8.1642e-07	1.19374e-05
					Pds5b	0.370642	2.4113e-06	3.12891e-05
					Samd9l	0.389543	4.40569e-22	2.37657e-20
					Col1a2	0	0.0454555	0.1
					Casd1	0.427664	0.00422965	0.0189457
					C1galt1	0.434937	0.000834552	0.00511158
					Glcci1	0.451423	0.0035936	0.0165968
					Tmem106b	0.48396	2.38837e-07	3.92966e-06
					Gm20186	0.381543	0.0347348	0.0892242
					Trim24	0.399399	0.00010511	0.000887914
					Kdm7a	0.423591	0.000106551	0.000895085
					Braf	0.308869	0.000299799	0.00217284
					Arhgef5	0.380146	0.00205862	0.0106704
					Nod1	0.490556	2.55841e-05	0.000255235
					Hpgds	0	0.00463508	0.0202794
					Gadd45a	0.483446	0.044141	0.1
					Rmnd5a	0.258234	2.51814e-07	4.13416e-06
					Mrpl53	0.132372	0.0300643	0.0806355
					Mthfd2	0.438918	0.0455865	0.1
					Pcyox1	0.498941	0.0379809	0.0953706
					A430078I02Rik	0.252711	0.0252919	0.0716183
					Aak1	0.497053	7.99933e-07	1.17532e-05
					Gfpt1	0.44192	0.000207721	0.00160237
					Vmn1r43	0.330931	0.0279327	0.0770449
					Iqsec1	0.426726	4.56114e-05	0.000424211
					Magi1	0	0.0026669	0.0131301
					Mitf	0.102956	0.0189026	0.0583144
					Camk1	0.392025	0.000169333	0.00134895
					Tamm41	0.351471	0.00222134	0.0113241
					Plxnd1	0.347477	0.0293796	0.0796111
					Erc1	0.477342	0.0171331	0.054457
					Usp18	0.205912	0.0287136	0.078377
					Phc1	0.132372	0.00211599	0.0108732
					Foxj2	0.40539	0.00464553	0.0202794
					Clec4d	0.0712773	0.00237963	0.0119364
					Clec4e	0.333578	0.00442725	0.0195984
					Atn1	0.428984	0.000359099	0.00252979
					Rad51ap1	0	0.0252867	0.0716183
					Gm44009	0.115826	0.0173094	0.0547586
					Klrb1a	0.490361	5.07084e-26	3.30132e-24
					Gm44511	0.416972	0.0315408	0.0836956
					Cd69	0.406802	0.0081651	0.0312761
					Klrc3	0.0712773	1.64329e-05	0.00017357
					Klra5	0.269216	5.00633e-06	6.00127e-05
					Lrp6	0.402872	2.31061e-05	0.000234226
					Cdkn1b	0.386597	1.29184e-09	3.19871e-08
					Lockd	0.481835	0.0346712	0.0892124
					Fam234b	0.248601	1.70068e-05	0.000178631
					Plekha5	0.483894	0.000151655	0.00122623
					Aebp2	0.406572	9.5201e-07	1.36685e-05
					Golt1b	0.492875	6.14588e-05	0.000553866
					Etnk1	0.469094	4.05343e-08	7.61486e-07
					Stk38l	0.231651	0.00511121	0.0218822
					Klhl42	0.26135	5.87209e-05	0.000532369
					3010003L21Rik	0.308869	0.0178068	0.0556613
					Ppp1r12c	0.463303	0.000311773	0.00223777
					Zfp579	0.432416	0.0096344	0.0356489
					Zfp551	0	0.0195688	0.0599428
					Zscan22	0.154434	0.00601502	0.0247282
					Lig1	0.452003	0.00445913	0.0196818
					Bicra	0.320748	0.00292944	0.0141907
					Arhgap35	0.185321	0.0170679	0.0543412
					Apoe	0.386289	1.09194e-12	3.80019e-11
					Zfp235	0.336947	0.0105298	0.038085
					Irgq	0.213832	0.0093846	0.0349472
					Rps19	0.499565	5.88737e-103	4.04197e-100
					Pou2f2	0.480462	0.0311853	0.0830798
					Zfp626	0.285109	0.00529165	0.0225397
					Gmfg	0.499287	1.22901e-19	5.97776e-18
					Fbxo27	0.481835	0.0299482	0.0806355
					Sars2	0.448358	0.0143416	0.0479453
					Map4k1	0.463303	0.0139992	0.0473031
					Gm26526	0.327037	0.00113922	0.00657757
					Cldnd2	0.132372	0.0300643	0.0806355
					Rpl13a	0.499334	1.46396e-70	2.30332e-68
					Hps5	0.43021	0.0121878	0.0425927
					Tmem86a	0	0.0142455	0.047727
					Chsy1	0.471222	6.72807e-11	1.92465e-09
					Ntrk3	0	0.0454555	0.1
					Abhd2	0.43662	9.63738e-16	3.89208e-14
					Sema4b	0.440517	0.000953342	0.00567351
					Gm26522	0.285109	0.0299499	0.0806355
					Picalm	0.437948	1.16225e-10	3.26295e-09
					Emsy	0.410137	7.54509e-08	1.35669e-06
					Arrb1	0.392025	0.0112769	0.0402106
					Gm38405	0	0.0252867	0.0716183
					C2cd3	0.356387	8.72027e-05	0.00076134
					Art2b	0.115826	0.0316469	0.0838593
					Trim12c	0.0842369	1.3233e-06	1.8337e-05
					Trim30d	0.480462	0.0272788	0.075823
					Gvin1	0.132372	0.0300643	0.0806355
					Dennd5a	0.256295	1.3177e-05	0.000143185
					Far1	0.416972	1.38261e-05	0.000149512
					Pde3b	0.467801	7.30387e-06	8.42125e-05
					Pik3c2a	0.43605	0.00603246	0.0247729
					Smg1	0.366642	2.01059e-10	5.52147e-09
					Itpripl2	0.49419	0.0267588	0.0746524
					Mosmo	0.49419	0.00568694	0.0237374
					Srcap	0.447327	0.00141209	0.00788189
					Bcl7c	0.483743	7.14673e-07	1.06245e-05
					Fbxl19	0.154434	0.0103151	0.0374882
					Zfp646	0.470218	0.000381945	0.00265361
					9130023H24Rik	0.40539	0.0416439	0.1
					Olfr46	0	0.0080983	0.0310915
					Ifitm2	0.490556	0.0147053	0.0488056
					Ifitm1	0.0926606	0.00580196	0.0241002
					Ifitm3	0.342441	0.000137986	0.00112901
					Rplp2	0.466503	1.78974e-124	2.70324e-121
					Polr2l	0.467439	5.57704e-11	1.62618e-09
					Tspan4	0.308869	0.0201129	0.0613217
					Tnfrsf26	0.441241	0.0357351	0.0913896
					Mrgpre	0	0.0454555	0.1
					Esr1	0.168474	0.0168936	0.0539455
					Ulbp1	0.173739	0.00207611	0.0107316
					Lats1	0.180173	7.1613e-06	8.2695e-05
					Zc3h12d	0	0.0454555	0.1
					Tab2	0.392704	7.13046e-25	4.4139e-23
					Stxbp5	0.475182	0.007464	0.0292216
					Hivep2	0.276599	2.64073e-07	4.31666e-06
					Heca	0.388357	3.163e-09	7.32735e-08
					Reps1	0.374206	0.000123633	0.00102042
					Tnfaip3	0.457125	0.000269433	0.00198902
					Map3k5	0.443159	0.0363351	0.0925142
					Rps12	0.438443	4.73286e-11	1.3962e-09
					Gm20300	0.356387	0.0434852	0.1
					Marcks	0.308869	0.0446255	0.1
					Foxo3	0.488123	1.56123e-05	0.000166767
					Prdm1	0.388577	0.00820599	0.0314101
					Ranbp2	0.490556	8.44672e-06	9.59249e-05
					Adamts14	0.445483	0.000980174	0.00579631
					Lrrc20	0.40539	0.0416439	0.1
					Gm16222	0	0.0454555	0.1
					Pcnt	0.486861	0.00224441	0.0114141
					Polrmt	0.40539	0.0416439	0.1
					Rnf126	0.426726	2.01887e-05	0.000209431
					Gadd45b	0.339755	1.40745e-07	2.42121e-06
					Smim24	0.40539	0.0416439	0.1
					Sirt6	0.43605	0.000785202	0.00484072
					Tmem263	0.489929	0.000108738	0.00090941
					Btbd11	0.406406	0.000456825	0.00310248
					Scyl2	0.450066	0.00573021	0.0238692
					Uhrf1bp1l	0.416972	0.000194392	0.00151541
					Gm47725	0	0.0454555	0.1
					Galnt4	0.231651	0.0154344	0.0505031
					Osbpl8	0.418876	4.04026e-05	0.000381403
					Lemd3	0.407706	0.0110308	0.0396126
					Mon2	0.35429	5.085e-06	6.07629e-05
					R3hdm2	0.447327	0.000580571	0.00376675
					Nemp1	0.252711	0.0252919	0.0716183
					Gdf11	0.463303	0.000349432	0.00246398
					Rdh5	0.205912	0.0287136	0.078377
					A430078G23Rik	0.487687	0.0104929	0.0379878
					Zfp358	0.441241	0.0453445	0.1
					Evi5l	0.308869	0.0241616	0.0702616
					Atp11a	0.407706	0.0110308	0.0396126
					Angpt2	0.115826	0.0173094	0.0547586
					Gm15056	0	0.0252867	0.0716183
					Ckap2	0	0.0454555	0.1
					Adam9	0.168474	0.0101356	0.0369779
					Tnks	0.191711	8.6305e-05	0.000755249
					Msr1	0	0.0252867	0.0716183
					Snx25	0.308869	0.0342153	0.0883101
					Ddx60	0.429403	0.00210556	0.0108541
					Naf1	0.330931	0.0369646	0.0936459
					Upf1	0.46538	3.50109e-10	9.34289e-09
					F2rl3	0	0.0252867	0.0716183
					Tmem184c	0.39015	0.0219872	0.0656911
					Rbmxl1	0.344783	0.000399485	0.00275519
					Otud4	0.346082	2.33433e-07	3.84912e-06
					Elmod2	0.397117	0.0125097	0.0434761
					Adgrl1	0.448358	0.0146307	0.0486532
					Samd1	0.39015	0.0273935	0.0760577
					2210011C24Rik	0.22062	0.00164138	0.00891144
					Rln3	0	0.00089333	0.00536285
					Junb	0.498941	4.14929e-08	7.7756e-07
					Phkb	0.448358	0.0146307	0.0486532
					Siah1a	0.492259	0.0186139	0.0575413
					Papd5	0.43373	0.00146728	0.00814176
					Nlrc5	0.391658	8.61191e-07	1.25555e-05
					Gm10073	0.112089	1.60022e-35	1.25885e-33
					Ap1g1	0.35487	0.000164083	0.00131407
					Pdpr	0.210592	0.00103064	0.00603369
					Gm42047	0	0.0195688	0.0599428
					Ccsap	0.252711	0.0252919	0.0716183
					Disc1	0.154434	0.000169298	0.00134895
					Irf2bp2	0.335727	1.39937e-11	4.45912e-10
					Il3ra	0.407706	0.000617341	0.00397798
					Slc4a7	0.489042	0.0114014	0.0404243
					Samd8	0.446143	0.0203429	0.0618232
					Dennd6a	0.438918	0.00378442	0.0172489
					Stab1	0.231651	0.00511121	0.0218822
					Ercc6	0.294829	0.00940841	0.0350186
					Ero1l	0.308869	0.000299799	0.00217284
					Naa30	0.301147	0.000105949	0.000892009
					Tep1	0.424694	0.0195577	0.0599428
					Chd8	0.482769	3.29936e-06	4.12532e-05
					B230359F08Rik	0	0.0454555	0.1
					Trdv2-2	0.216865	1.08866e-06	1.54252e-05
					Trdc	0.407193	3.61535e-22	1.9785e-20
					Bcl2l2	0.0926606	0.00580196	0.0241002
					Emc9	0.463303	0.00955836	0.0354544
					Khnyn	0.43021	1.60052e-05	0.000170003
					Mcpt8	0	0.0454555	0.1
					Gm16973	0.213832	0.0093846	0.0349472
					Zmym2	0.491382	0.000775681	0.00479769
					Sacs	0.496396	0.0293536	0.0795977
					Wdfy2	0.205912	0.0287136	0.078377
					Mtmr9	0.441241	0.0299523	0.0806355
					Extl3	0.438918	0.00436013	0.0193922
					Dpysl2	0.389443	6.64431e-09	1.4715e-07
					Kctd9	0.424694	0.0195577	0.0599428
					Gm10847	0.102956	0.0100051	0.0366971
					Cog3	0.343187	0.00453925	0.0199654
					Gpalpp1	0.442244	0.0025907	0.0128128
					Rgcc	0.490556	0.00611825	0.0250643
					Klf12	0	0.0080983	0.0310915
					Acod1	0.132372	0.0300643	0.0806355
					Spry2	0.495774	3.31117e-13	1.19077e-11
					Rap2a	0.308869	0.0093731	0.0349388
					Fam76b	0.425327	0.000184022	0.00144464
					Zfp317	0.452003	0.00284713	0.0138631
					Olfr77	0.372902	1.25581e-06	1.74658e-05
					Dnmt1	0.490105	5.21931e-06	6.22693e-05
					Ldlr	0.277982	0.0412589	0.1
					Dpy19l1	0.438032	0.000567337	0.00370637
					Slc37a2	0	0.0454555	0.1
					Olfr920	0	0.0252867	0.0716183
					Gramd1b	0.489042	1.38385e-05	0.000149512
					Crtam	0.463303	0.0267394	0.0746259
					Kmt2a	0.434042	1.57431e-10	4.35504e-09
					Cd3d	0.471979	2.25131e-05	0.000229447
					Rpl10-ps3	0.465896	1.18475e-39	1.00531e-37
					Mpi	0.308869	0.0342153	0.0883101
					Senp8	0.277982	0.0412589	0.1
					Rplp1	0.451514	6.20819e-115	7.81409e-112
					Map2k5	0.432416	0.00132559	0.00747086
					Dis3l	0.446143	0.0174066	0.0548982
					Pclaf	0.132372	0.00211599	0.0108732
					Herc1	0.446951	2.21074e-09	5.26676e-08
					Vps13c	0.408797	0.00444661	0.0196603
					Zfp280d	0.47043	0.000704867	0.0044323
					Rfx7	0.468628	3.71039e-05	0.000355181
					Lrrc1	0.0712773	0.0042081	0.0188828
					Phip	0.482794	2.10047e-13	7.7004e-12
					Fam46a	0.37682	7.54924e-10	1.91961e-08
					Bcl2a1a	0.308869	0.0342153	0.0883101
					Gm26882	0.381543	0.0276455	0.0764764
					Plscr4	0.314696	1.95708e-05	0.000203861
					Xrn1	0.361442	2.78507e-10	7.56582e-09
					Slc25a36	0.467009	1.78931e-06	2.37486e-05
					Rbm15b	0.449263	0.0100163	0.0367025
					Elp6	0.322298	0.00547511	0.0230867
					Ccrl2	0.390498	2.61516e-09	6.13349e-08
					Gpd1l	0.477342	0.0153549	0.0504178
					Ccr5	0.437564	6.09346e-12	2.02723e-10
					Eif4enif1	0.492875	0.006312	0.0257112
					Kremen1	0.285109	0.0214431	0.064492
					Zmiz2	0.491382	0.000874561	0.00530501
					Xpo1	0.468885	0.000124335	0.00102509
					Acyp2	0.418467	0.00801601	0.0309342
					Psme4	0.363375	8.34548e-05	0.000732003
					Cpeb4	0.463303	0.00473204	0.0205975
					Nsg2	0.163519	4.53553e-06	5.498e-05
					Pank3	0.463303	0.0130771	0.0450337
					Gm12166	0.115826	7.43719e-09	1.63273e-07
					Cnot6	0.291	7.32794e-12	2.41664e-10
					Jade2	0.486088	0.00101942	0.00597543
					Gm26551	0.289564	0.0156691	0.0510281
					Tcf7	0.487687	0.000153611	0.00123808
					Fnip1	0.489527	0.00256092	0.0126904
					Slc36a1	0.370642	0.0079192	0.0306698
					Llgl1	0.480462	0.0272788	0.075823
					Ulk2	0.430979	0.00193686	0.0101578
					Cenpv	0	0.0454555	0.1
					Hs3st3b1	0.43021	0.000564832	0.0036964
					Map2k4	0.482607	0.00374137	0.0171035
					Pik3r5	0.399712	0.000300838	0.00217619
					Rangrf	0.277982	0.0412589	0.1
					Pfas	0.370642	0.000966012	0.00573085
					Dlg4	0.415375	0.0069616	0.0276252
					0610010K14Rik	0.410853	2.03531e-07	3.39311e-06
					Rnasek	0.185321	0.0170679	0.0543412
					Rap1gap2	0	0.0142455	0.047727
					Sgsm2	0.205912	0.00192649	0.0101225
					Wdr81	0.381543	0.0276455	0.0764764
					Mrm3	0.39015	0.03318	0.0866763
					Taok1	0.372374	2.33222e-08	4.5987e-07
					Fam222b	0.308869	0.0241616	0.0702616
					2610507B11Rik	0.470898	0.000870605	0.00528525
					Ksr1	0.496396	0.0373937	0.0944163
					Suz12	0.493518	8.15757e-05	0.000717187
					Ccl7	0.185321	0.00559491	0.0234428
					Slfn1	0	0.0080983	0.0310915
					Ccl9	0.411825	0.0328409	0.0861339
					Wfdc17	0.397117	0.0174754	0.0548982
					Med13	0.472758	0.00233256	0.0117281
					Cltc	0.494654	1.68374e-06	2.25856e-05
					Mtmr4	0.370642	0.0347152	0.0892242
					Rnf43	0.285109	3.06744e-05	0.000301241
					Gm45716	0.231651	1.26005e-05	0.000137315
					Mbtd1	0.416301	8.67216e-05	0.000758016
					Spag9	0.404724	4.189e-06	5.16077e-05
					Ankrd40	0.472758	0.00206197	0.0106731
					Mycbpap	0	0.0454555	0.1
					Mllt6	0.411143	8.99545e-10	2.27204e-08
					Wipf2	0.429403	0.00210556	0.0108541
					Hexim1	0.418467	0.00671216	0.0269058
					Hexim2	0	0.0454555	0.1
					Cdc27	0.250956	6.52992e-06	7.66941e-05
					Itgb3	0.370642	0.00269606	0.0132299
					Tlk2	0.498941	0.0113934	0.0404243
					Ern1	0.350051	0.000204294	0.00157916
					Smurf2	0.49419	0.0262957	0.0735505
					Recql5	0.336947	0.00629918	0.0256728
					Fbf1	0.168474	0.0168936	0.0539455
					Ten1	0.436828	1.40344e-07	2.41983e-06
					1810032O08Rik	0.364024	0.00334685	0.0157775
					Tk1	0.205912	0.0287136	0.078377
					Tbc1d16	0	0.0454555	0.1
					Slc26a11	0.218025	0.00696478	0.0276252
					Rnf213	0.376433	2.87328e-05	0.000283278
					Rptor	0.427664	9.7255e-05	0.000832737
					Nploc4	0.401529	0.00842458	0.0321003
					Oxld1	0.381543	0.0276455	0.0764764
					Foxk2	0.231651	0.000889319	0.00536285
					Fam208b	0.366569	6.98168e-07	1.04615e-05
					Heatr1	0.463303	0.0190107	0.0586001
					Lyst	0.468146	1.30868e-11	4.1878e-10
					Inhba	0	0.0454555	0.1
					Tcrg-V6	0.285109	0.0214431	0.064492
					Tcrg-C1	0.463303	0.0100141	0.0367025
					Tcrg-V1	0.218025	0.000231918	0.00176026
					Hist1h4j	0	0.0015409	0.00848816
					Hist1h2ak	0	0.00660648	0.026581
					Hist1h1b	0	0.0142455	0.047727
					Hist1h4n	0.308869	7.43396e-06	8.54515e-05
					Hist1h2ap	0.102956	0.0100051	0.0366971
					Hist1h4i	0.29416	1.40751e-06	1.92914e-05
					Hist1h4h	0.397117	0.0174754	0.0548982
					Hist1h2bh	0	0.0252867	0.0716183
					Hist1h2ad	0	0.0252867	0.0716183
					Hist1h4d	0.248198	5.56049e-07	8.48345e-06
					Hist1h1e	0.41561	6.86285e-08	1.24888e-06
					Hist1h4c	0.400125	0.000859877	0.00523697
					Hist1h1c	0.383673	1.21168e-08	2.55605e-07
					Hist1h2bb	0.231651	0.0154344	0.0505031
					Hist1h2ab	0	0.0252867	0.0716183
					Gmnn	0.35487	0.000247341	0.00185864
					BC005537	0.451247	5.29779e-13	1.87836e-11
					Gm48708	0	0.0142455	0.047727
					Tmem170b	0.308869	0.0241616	0.0702616
					Hivep1	0.308869	0.0093731	0.0349388
					Ranbp9	0.359296	0.000203618	0.00157663
					Gm34084	0	0.0454555	0.1
					Atxn1	0.449047	6.09251e-07	9.22063e-06
					Fam8a1	0.418467	0.00010852	0.000909164
					Nup153	0.474885	0.000214381	0.00164367
					Phf2	0.472758	0.00238031	0.0119364
					Fam120a	0.443159	8.97039e-08	1.60153e-06
					Iars	0.446143	0.0174066	0.0548982
					Rnf44	0.483018	3.76626e-05	0.000359583
					Smad5	0.375055	0.000626039	0.00402373
					Hnrnpa0	0.467593	1.18206e-10	3.30629e-09
					Agtpbp1	0.446143	0.0146614	0.0487135
					Ctla2b	0.386086	0.00934374	0.0348638
					Zfp808	0.205912	0.0287136	0.078377
					Zfp729b	0.402872	0.013885	0.0470014
					Zfp273	0.277982	0.0412589	0.1
					Gm47469	0.411825	0.0328409	0.0861339
					Arrdc3	0.39015	0.00290832	0.0141246
					Zfyve16	0.370642	0.0022676	0.0114797
					Serinc5	0	0.000772838	0.00478403
					A630019I02Rik	0	0.0454555	0.1
					Hmgcr	0.416972	0.00263289	0.0130129
					Gm10260	0.232154	4.40978e-189	3.33029e-185
					Gm10320	0.419411	2.87913e-21	1.50996e-19
					Tnpo1	0.49419	0.000263596	0.00195166
					Erbin	0.458805	6.43262e-06	7.59518e-05
					Nln	0.292612	0.00597874	0.0246461
					Emb	0.450634	3.42973e-17	1.4972e-15
					1110002L01Rik	0.463303	0.0434208	0.1
					Dtnbos	0	0.0454555	0.1
					Wdcp	0.365765	0.000806827	0.00496189
					Fam49a	0.495036	0.000663513	0.00422503
					Lpin1	0.364024	0.00427332	0.0191074
					Kidins220	0.442244	0.00158279	0.00866182
					Rps7	0.492415	1.11342e-83	2.89952e-81
					Nampt	0.479279	0.0214927	0.0645639
					Immp2l	0.327037	0.0247294	0.0715272
					Strn3	0.487184	3.85741e-05	0.000366894
					Prps1l3	0.443159	0.0235746	0.068873
					Mipol1	0.407706	0.0110308	0.0396126
					Fbxo33	0.404574	3.21589e-05	0.000314593
					Klhl28	0.328173	9.84538e-05	0.000841843
					Fancm	0.231651	0.0154344	0.0505031
					Slc38a6	0.115826	0.00074376	0.00464977
					Hif1a	0.491382	0.000684711	0.00432717
					Gm47689	0.463303	0.017723	0.0555373
					Plekhg3	0.285109	0.0214431	0.064492
					Slc39a9	0.223663	0.000284151	0.00207536
					Susd6	0.435393	1.66579e-05	0.000175455
					Cox16	0.496396	0.000143056	0.00116544
					Fos	0.285109	0.00104001	0.00607198
					Gm26698	0.198558	0.0179463	0.0559584
					Gm6566	0	0.0454555	0.1
					Tmed8	0.339755	0.00192156	0.0101057
					Eml5	0.407706	0.0162271	0.0524158
					Ttc7b	0.296514	0.0017061	0.00917705
					Btbd7	0.402342	2.15601e-05	0.000221227
					Ifi27l2a	0.266988	1.71995e-05	0.000180405
					Serpina3f	0.272531	0.0175494	0.0550618
					Dicer1	0.454037	8.60046e-06	9.7378e-05
					Gm28875	0.182012	1.51376e-08	3.1235e-07
					Dync1h1	0.394947	1.84656e-08	3.69901e-07
					Rcor1	0.484048	0.000644897	0.00412387
					Traf3	0.443159	0.0280714	0.0773427
					Lbhd2	0.109012	0.000841273	0.00514857
					Gm26583	0	0.0454555	0.1
					Esyt2	0.441241	3.99957e-07	6.25361e-06
					Ncapg2	0	0.0026669	0.0131301
					Sp4	0.356387	7.12411e-06	8.23915e-05
					AW549877	0.352993	0.000580451	0.00376675
					Ttc33	0.49419	0.000370409	0.00258774
					Nup155	0.176496	0.000436692	0.00298725
					Nadk2	0.463303	0.0143928	0.0480952
					Il7r	0.426026	3.68444e-07	5.80899e-06
					Pdzd2	0.308869	0.0464282	0.1
					2023-03-06	0.479849	0.00145907	0.00810218
					Pop1	0.115826	0.0173094	0.0547586
					Gm26766	0	0.0252867	0.0716183
					Rrm2b	0.498941	0.00271775	0.0133276
					Zhx2	0.296514	0.00225068	0.0114229
					Trmt12	0.481835	0.0299482	0.0806355
					Pvt1	0.40539	0.0416439	0.1
					Dennd3	0.247095	0.00828106	0.0316333
					Ly6a	0.0182682	4.17747e-72	7.33686e-70
					Gm28068	0.252711	0.0252919	0.0716183
					Scrib	0.381543	0.00174059	0.0093232
					Plec	0.408797	5.46556e-05	0.000499107
					Oplah	0.154434	0.00601502	0.0247282
					Lgals1	0.390076	1.33107e-48	1.43039e-46
					Micall1	0.463303	0.00133095	0.00749546
					Ddx17	0.373461	2.61705e-17	1.15579e-15
					Mief1	0.479279	0.0185455	0.0573531
					Ep300	0.475389	3.07767e-06	3.88675e-05
					Ccdc134	0.463303	0.039944	0.0991858
					Cenpm	0.213832	0.0145122	0.0483656
					Gm20324	0.352993	0.00962258	0.0356227
					Gxylt1	0.481835	0.000225893	0.00172318
					Fmnl3	0.448358	0.010845	0.0390592
					Dip2b	0.39015	0.00206353	0.0106739
					Pou6f1	0.240231	0.000481984	0.00323841
					A330009N23Rik	0.168474	0.0101356	0.0369779
					Zfp740	0.43605	1.35756e-06	1.87429e-05
					Sp1	0.377506	1.21775e-06	1.69991e-05
					Gm26518	0.347477	0.0293796	0.0796111
					Crebbp	0.492259	1.9255e-07	3.22428e-06
					Clec16a	0.40539	0.00464553	0.0202794
					Rmi2	0.285109	0.0214431	0.064492
					Ppm1f	0.397117	0.0174754	0.0548982
					Iglc1	0	0.0454555	0.1
					Vps8	0.319519	0.00157211	0.00861586
					Rtp4	0.298905	7.67173e-06	8.77837e-05
					Bcl6	0.40539	0.0416439	0.1
					Opa1	0.445483	0.00118762	0.00679985
					Atp13a3	0.328796	4.28514e-06	5.26205e-05
					Tfrc	0.115826	0.0316469	0.0838593
					Lrch3	0.479849	0.00127529	0.00723054
					Iqcg	0.0375651	3.7653e-13	1.34767e-11
					Dtx3l	0.474077	0.000186338	0.00146131
					Parp9	0.487687	0.0118708	0.0417165
					Slc15a2	0	0.0026669	0.0131301
					Zdhhc23	0.115826	0.0173094	0.0547586
					Usf3	0.264744	0.00344335	0.0161018
					Abhd10	0.498941	0.0100529	0.036783
					Plcxd2	0.450066	0.00897356	0.033783
					Dubr	0.489042	0.0147129	0.0488056
					Cblb	0.496997	3.49504e-05	0.000336668
					Nfkbiz	0.43021	1.09545e-05	0.000120439
					Tbc1d23	0.407706	3.33357e-05	0.000324006
					Crybg3	0.252711	0.0252919	0.0716183
					Zfp654	0.497621	0.00311323	0.0149089
					Ltn1	0.451423	0.00424701	0.0190015
					Bach1	0.381543	0.0347348	0.0892242
					Urb1	0.231651	0.0017241	0.0092541
					Setd4	0.479279	0.0214927	0.0645639
					Dyrk1a	0.419868	0.000122268	0.00101026
					Scaf8	0.463303	0.000240126	0.00181601
					Tulp4	0.332446	4.23647e-10	1.11867e-08
					Tmem181a	0.451217	8.73128e-07	1.2705e-05
					Dynlt1c	0.254362	1.73172e-06	2.3106e-05
					Dynlt1f	0.49419	0.00120403	0.00688332
					Tagap1	0.383423	0.00617843	0.0252215
					Igf2r	0.347477	3.60218e-06	4.45965e-05
					Phf10	0.496396	0.0293536	0.0795977
					Lnpep	0.425013	1.1438e-12	3.96241e-11
					Rab26os	0.294829	0.0031875	0.0151875
					Gfer	0.360347	0.00190724	0.0100373
					Unkl	0.453445	0.00167309	0.00904455
					Gm8186	0.387016	2.64049e-16	1.10172e-14
					Dusp1	0.233535	2.16525e-09	5.17471e-08
					Gm8225	0.123547	0.0012546	0.00712389
					Crebrf	0.399399	1.72181e-07	2.92207e-06
					Itpr3	0.484048	0.00049069	0.00328226
					Hmga1	0.40539	0.0416439	0.1
					D17Wsu92e	0.45545	0.000540617	0.00356885
					Dnah8	0	0.0252867	0.0716183
					Zfp811	0.205912	0.0287136	0.078377
					Hspa1b	0.247706	7.19719e-11	2.05108e-09
					Hspa1a	0.300196	7.85157e-11	2.22915e-09
					Sapcd1	0	0.00463508	0.0202794
					D17H6S53E	0.349662	6.14428e-05	0.000553866
					Prrc2a	0.448595	3.93303e-07	6.17051e-06
					H2-Q6	0.219624	3.6834e-44	3.56631e-42
					H2-Q7	0.318698	2.39475e-54	2.91699e-52
					H2-Q10	0.463303	0.0149922	0.0494635
					Pou5f1	0	0.00089333	0.00536285
					Ier3	0.498941	0.00986724	0.0363325
					Tubb5	0.475576	4.38697e-20	2.17964e-18
					H2-T23	0.486861	9.36403e-31	6.67147e-29
					BC023719	0	0.0142455	0.047727
					Gm42418	0.356484	1.03861e-62	1.35236e-60
					Slc25a27	0	0.0252867	0.0716183
					Vegfa	0	0.0142455	0.047727
					Abcc10	0.289564	0.0112772	0.0402106
					Gm5093	0.173739	0.00345258	0.016135
					Cul7	0.132372	0.0300643	0.0806355
					Ppp2r5d	0.480462	0.0272788	0.075823
					AI661453	0	0.0454555	0.1
					Trem2	0.115826	0.0173094	0.0547586
					Satb1	0.497972	9.22294e-12	3.01524e-10
					Kat2b	0.403905	0.00131166	0.00740338
					Pot1b	0.39015	0.03318	0.0866763
					Mllt1	0.292612	0.00597874	0.0246461
					Khsrp	0.483446	0.00361678	0.0166753
					Man2a1	0.471726	0.0018915	0.00996841
					Rab12	0.247095	0.000372352	0.00259651
					Tgif1	0.347477	0.00839602	0.0320238
					Gm28727	0.252711	0.0252919	0.0716183
					Gm4707	0.231651	0.00511121	0.0218822
					Crim1	0.488346	0.000495358	0.00330182
					Strn	0.428728	0.000105676	0.000890702
					Eif2ak2	0.441241	0.0409062	0.1
					Atl2	0.421184	0.0248183	0.0716183
					Sos1	0.438918	0.0381184	0.0955117
					Map4k3	0.102956	0.0100051	0.0366971
					Thada	0.308869	0.0111595	0.0400176
					Socs5	0.362585	0.00776151	0.0301364
					Gm47283	0.26597	4.363e-30	3.0794e-28
					Map3k8	0.463303	0.00227673	0.0115073
					Zeb1	0.49593	3.58583e-06	4.44669e-05
					Mpp7	0.330931	0.0369646	0.0936459
					Gm10036	0.475182	2.77518e-06	3.54625e-05
					Gm10269	0.460193	2.74417e-08	5.31387e-07
					Trappc8	0.448825	0.000248786	0.00186764
					Epb41l4aos	0.490556	0.0167351	0.0536208
					Egr1	0.356387	0.0434852	0.1
					Gm5239	0.319519	1.9098e-08	3.81558e-07
					Dnajc18	0.333578	0.00335643	0.015803
					Cd14	0.308869	1.13736e-06	1.6025e-05
					Nr3c1	0.434085	3.52168e-12	1.19264e-10
					Hmgxb3	0.481835	0.039582	0.0984928
					Smad4	0.390912	2.56997e-05	0.000256049
					Pias2	0.351471	0.00363058	0.0167102
					Epg5	0.370642	0.0347152	0.0892242
					Adnp2	0.289564	0.0112772	0.0402106
					Zfp236	0.370642	0.0185248	0.0573126
					Zfp407	0.463303	0.00308116	0.0148211
					Socs6	0.449263	0.0085715	0.0325452
					Kmt5b	0.372297	2.76181e-08	5.33435e-07
					Gstp1	0.193864	8.75115e-34	6.54348e-32
					Ankrd13d	0.252711	0.0368492	0.0935063
					Grk2	0.482607	4.61529e-11	1.36686e-09
					Zdhhc24	0.330931	0.0279327	0.0770449
					Ccdc85b	0.472758	1.64831e-05	0.000173857
					Atg2a	0.451423	0.0035936	0.0165968
					1810009A15Rik	0.0661861	0.000671458	0.00426483
					Ganab	0.496737	3.81989e-05	0.000363783
					Pcna-ps2	0.240231	0.000322502	0.00230203
					Ms4a4c	0.302154	9.17288e-05	0.000795339
					Gm37387	0.427664	0.00258563	0.0127961
					Fam111a	0.418688	3.70362e-08	7.01817e-07
					Zfp91	0.441825	1.93503e-08	3.85578e-07
					Tmem2	0.25739	0.000149718	0.00121188
					Gm6563	0.185321	5.35547e-07	8.20382e-06
					Gm10053	0.258588	1.44324e-05	0.000155042
					Jak2	0.411825	4.49179e-06	5.46251e-05
					Ric1	0.407145	1.59279e-08	3.25986e-07
					Tnks2	0.449874	9.34967e-08	1.66139e-06
					Btaf1	0.463303	0.0210398	0.0635574
					Ubtd1	0.381543	0.0276455	0.0764764
					Pi4k2a	0.479279	0.0214927	0.0645639
					Entpd7	0.440138	0.00299894	0.0144809
					Fbxw4	0.463303	0.00162705	0.00884632
					Slk	0.469649	0.000364593	0.00255895
					Dusp5	0.330275	3.25176e-08	6.24871e-07
					Pdcd4	0.498584	6.77367e-28	4.527e-26
					Pdzd8	0.401901	4.93475e-06	5.92488e-05
					Rps12-ps3	0.333137	2.42199e-29	1.67807e-27
					mt-Nd6	0.402872	0.0170905	0.0543903

## Sheet: NKT
Up					Down
Name	FC	pVal	Qval		Name	FC	pVal	Qval
AI597479	Inf	0.014147	0.1		Ncoa2	0.254793	0.0112512	0.0925813
Rab3gap1	3.79004	0.015172	0.1		Ube2w	0.445887	0.0153002	0.1
B3galt2	4.68182	0.00368021	0.0465667		Zfp451	0.260101	0.0134634	0.1
Fcrl6	3.26984	0.0134213	0.1		Arid5a	0.385085	0.0108139	0.090155
Med22	Inf	0.014147	0.1		Map4k4	0.377289	0.00547399	0.0604634
Cacfd1	4.45887	0.00562407	0.0613141		Tpp2	0.421116	0.00618892	0.0659138
Golga2	6.68831	0.00619442	0.0659138		Inpp1	0.428052	0.00592791	0.0635835
Metap1d	Inf	0.00261358	0.0365242		Fam117b	0.243211	0.0153906	0.1
Rbm45	8.47186	0.000550402	0.0125895		Raph1	0.297258	0.0118033	0.0955796
Gm10800	5.12771	0.00110208	0.0212184		Ikzf2	0.215903	1.67236e-06	7.92129e-05
Commd9	Inf	0.000864697	0.0172692		Pnkd	0.359187	0.000193282	0.00555509
Adal	5.79654	0.0107626	0.0898678		Sp110	0	0.00636502	0.0666688
Mmp9	7.58009	0.00150597	0.0259178		Inpp5d	0.376218	0.00103814	0.0201321
Mocs3	Inf	0.00801247	0.0755026		Dgkd	0.339724	0.00986788	0.0861603
Gm20721	5.79654	0.0107626	0.0898678		Tsn	0.428738	0.000195122	0.00555509
Tfe3	Inf	0.00261358	0.0365242		Dhx9	0.281613	0.00367181	0.0465667
Mid1ip1	3.79004	0.015172	0.1		Prrc2c	0.445887	5.11728e-05	0.00173351
Atp6ap2	2.61959	0.00172259	0.0286332		Uhmk1	0.346801	0.0112606	0.0925813
Gab3	9.36364	0.000198743	0.00559863		Fcer1g	0.409045	1.09848e-10	1.15283e-08
Apex2	Inf	0.00801247	0.0755026		Arhgap30	0.489038	8.51339e-06	0.000340805
Rusc1	3.23268	0.00438401	0.0530876		G0s2	0.111472	0.00153372	0.0263109
Zfp687	5.79654	0.0107626	0.0898678		Mindy3	0.237807	0.00406035	0.0505405
Golph3l	Inf	0.014147	0.1		Spopl	0.352016	0.0130132	0.1
Gpr89	7.1342	0.0038658	0.0485706		Psd4	0.445887	0.00868267	0.0797129
Dnajb14	5.79654	0.0107626	0.0898678		Mrpl41	0.445887	0.0103295	0.0880367
Mms22l	Inf	0.00801247	0.0755026		Abca2	0.267532	0.0096443	0.0849588
Dcaf12	4.45887	0.00421222	0.0520676		Prrc2b	0.325841	0.00124507	0.0232197
Sit1	2.37807	0.00730579	0.0728176		Rpl35	0.332656	7.82099e-24	2.09303e-20
Gng10	Inf	0.00801247	0.0755026		Epc2	0.0891775	0.000422771	0.0104277
Gnl2	4.68182	0.00482888	0.0555824		Mmadhc	0.27868	0.00891672	0.0811125
Map7d1	3.5671	0.000393769	0.00998855		Gpd2	0.375484	0.0135715	0.1
Bsdc1	3.79004	0.015172	0.1		2023-03-07	0.445887	0.0104353	0.0883753
Pusl1	Inf	0.000288498	0.00787826		Itga4	0.303203	0.011338	0.0929324
Prr14l	3.79004	0.015172	0.1		Celf1	0.380636	0.00100933	0.0197885
Maea	2.60101	0.0125462	0.0993366		Hipk3	0.0990861	0.00755212	0.0743043
Man2b2	6.24242	0.00662799	0.0680907		Dnajc24	0.318491	0.0145863	0.1
Guf1	3.79004	0.015172	0.1		Aven	0.162141	0.00646985	0.0675026
Gbp8	Inf	0.0015013	0.0259178		Snap23	0.360957	0.00929667	0.0827936
Kctd10	3.23268	0.00438401	0.0530876		Eif3j1	0.19619	0.000196589	0.00556725
P2rx7	2.34091	0.0140022	0.1		Il1b	0.17517	4.04147e-05	0.00143254
Denr	2.01619	0.000417035	0.0103508		Tasp1	0.267532	0.0096443	0.0849588
Ubc	3.32784	7.73056e-14	2.95547e-11		Tm9sf4	0.334416	0.0106761	0.0898678
Usp42	Inf	0.000864697	0.0172692		Acot8	0.375484	0.0135715	0.1
Uspl1	5.79654	0.0156231	0.1		Pmepa1	0.247715	0.00907733	0.0815806
Vps50	Inf	0.00456574	0.0538269		Dido1	0.427309	0.012766	0.1
Zfp800	2.7645	0.0093802	0.0833987		Pcmtd2	0.258145	0.00260561	0.0365242
Gm20594	Inf	0.00456574	0.0538269		Plp2	0.382189	0.00912148	0.0815806
Sema4f	Inf	0.000864697	0.0172692		Kdm6a	0.403422	0.012079	0.0969277
Raf1	2.73902	0.00226136	0.0337147		Phf6	0.297258	0.0054309	0.0604044
Klri2	12.4848	0.000103831	0.00323105		Rpl10	0.494091	0.00589162	0.0634486
Mansc1	Inf	5.02842e-05	0.00171426		Lage3	0.321039	0.0019915	0.0316296
Bbc3	Inf	0.00261358	0.0365242		Pin4	0.497735	0.00633191	0.0664628
Gm26890	Inf	0.00801247	0.0755026		Rpl36a	0.486768	2.6411e-12	4.73067e-10
Erf	Inf	0.00801247	0.0755026		Morf4l2	0.473755	0.00547887	0.0604634
Shkbp1	2.74964	0.00432068	0.0526783		Huwe1	0.316436	0.00108106	0.0208888
Akt2	3.12121	0.00629366	0.0664415		Syap1	0.339724	0.00986788	0.0861603
Tmem126b	11.1472	2.51412e-05	0.000934475		Tnfsf10	0.254793	0.000399799	0.0100937
Ilk	2.17989	0.0141189	0.1		Atp11b	0.416162	0.00542293	0.0604044
Chst15	Inf	0.014147	0.1		4932438A13Rik	0.478916	0.0125685	0.0993665
Ptpre	2.22944	0.00568021	0.0617936		Commd2	0.377289	0.0133724	0.1
Tnfrsf26	Inf	0.00456574	0.0538269		Mef2d	0.27868	0.00521022	0.0590824
Armt1	3.41847	0.00753657	0.0743043		Arhgef2	0.423593	0.0140714	0.1
Ust	Inf	0.014147	0.1		Atp8b2	0.0810704	0.00243003	0.0349633
Cenpw	Inf	0.00801247	0.0755026		Ubap2l	0.494353	0.00295422	0.0403368
Tspyl4	Inf	0.0015013	0.0259178		S100a4	0.483835	1.99034e-06	9.26346e-05
Pfkl	3.45563	0.00208484	0.0324383		S100a8	0.240093	0.00790383	0.0755026
Ptbp1	2.17989	0.0120491	0.0968335		Psmb4	0.483045	9.89203e-05	0.00311444
Prdm4	Inf	0.00801247	0.0755026		Mcl1	0.411588	0.000383284	0.00981564
Spryd4	Inf	0.014147	0.1		Rprd2	0.312121	0.00622207	0.0659458
Cul4a	Inf	0.0065265	0.0676978		Hipk1	0.445887	0.00127244	0.0235658
Polb	2.94286	0.00558212	0.0612242		AI504432	0.306548	0.01145	0.0934208
Tm2d2	2.7868	0.0154024	0.1		Rnpc3	0.328549	0.00702188	0.071008
Casp3	Inf	0.00456574	0.0538269		Nfkb1	0.40873	0.00197137	0.0314969
Hsh2d	Inf	0.00456574	0.0538269		Pkn2	0.49543	0.00137275	0.0248753
Large1	Inf	0.00128205	0.0235806		Tox	0.234678	0.00286544	0.0393252
Rab4a	Inf	0.000166977	0.00485716		Hint2	0.459821	0.00786838	0.0755026
Abhd6	Inf	0.00801247	0.0755026		Akna	0.36014	0.00229775	0.0338283
Tspan14	4.16162	0.00441747	0.053372		Ssbp3	0.306548	0.01145	0.0934208
Traj18	5.57359	0.000634526	0.01433		Uqcrh	0.492117	5.90993e-13	1.32426e-10
Cdadc1	4.01299	0.00997168	0.0865936		Macf1	0.40794	0.000302644	0.00822262
Gm26916	Inf	0.00456574	0.0538269		Zmym4	0.121606	0.00806961	0.0755093
Elp3	3.79004	0.015172	0.1		Hdac1	0.366265	0.00211402	0.0326079
Reep4	5.12771	0.00274408	0.0380498		Epb41	0.401299	0.01432	0.1
Naa16	3.41847	0.00924618	0.0824812		Vps13d	0.171495	0.00336782	0.0438702
Tpm3-rs7	2.09829	0.00082712	0.0169618		Zfp990	0.21121	0.00204634	0.0321194
Ccdc84	6.24242	0.00662799	0.0680907		Tardbp	0.417427	0.000545772	0.0125372
Zbtb16	8.02597	0.000911923	0.0181447		Cdk6	0.250812	0.00880971	0.0806027
Arid3b	Inf	0.00128205	0.0235806		Galnt11	0.191095	0.00545094	0.0604044
Gmppb	6.68831	0.00619442	0.0659138		Fam193a	0.254793	0.00445009	0.053645
Tmed4	4.01299	0.00193619	0.0311206		Mfsd10	0.460271	0.0134592	0.1
Hus1	Inf	0.0015013	0.0259178		Tbc1d1	0.42562	0.0140411	0.1
Fancl	Inf	0.000499065	0.0117653		Rpl9	0.325738	2.09781e-11	2.61121e-09
Zswim7	Inf	0.0112599	0.0925813		Ube2k	0.423021	0.00173943	0.0288236
Rangrf	Inf	0.00801247	0.0755026		Pds5a	0.429963	0.0146704	0.1
Dvl2	Inf	0.00456574	0.0538269		Ankrd17	0.262959	9.16031e-05	0.00290113
Ctns	Inf	0.000864697	0.0172692		Cxcl2	0.107239	3.36808e-13	1.00151e-10
Rph3al	Inf	0.00801247	0.0755026		2023-09-11	0.493179	0.000472807	0.0112974
Poldip2	4.01299	0.00997168	0.0865936		Ep400	0.445887	0.0128867	0.1
Lig3	Inf	0.00261358	0.0365242		Ube3b	0.148629	0.00791429	0.0755026
Dhx40	Inf	0.000499065	0.0117653		Gcn1l1	0.314744	0.0064486	0.0674124
Epop	Inf	0.014147	0.1		Mphosph9	0.222944	0.00461952	0.0538677
Map3k3	Inf	0.00801247	0.0755026		Sfswap	0.21121	0.00204634	0.0321194
Unc13d	2.45238	0.00480725	0.0554527		Ttyh3	0.260101	0.0134634	0.1
Wdr37	Inf	0.00801247	0.0755026		Zfp12	0.133766	0.0070597	0.071008
Eci2	5.79654	0.00260046	0.0365242		Rpl21	0.499934	0.000995444	0.0196108
Fbxw17	5.79654	0.0107626	0.0898678		Slc7a1	0.0810704	0.0146981	0.1
Gm49359	7.1342	0.00562468	0.0613141		Hsph1	0.445887	0.00633293	0.0664628
Nsun2	2.1737	0.0151138	0.1		Samd9l	0.352994	7.71119e-07	3.75208e-05
Arsk	Inf	0.000864697	0.0172692		Phf14	0.445887	0.00627379	0.0663626
Poc5	Inf	0.00456574	0.0538269		Gm20186	0.111472	0.0133485	0.1
Trappc12	4.23593	0.0065039	0.0675944		Mtpn	0.418864	0.00112757	0.0215311
Atp5s	Inf	0.014147	0.1		Osbpl3	0.429963	0.01378	0.1
Zfyve26	4.68182	0.00368021	0.0465667		Mob1a	0.45732	0.00195628	0.0313494
Aldh6a1	Inf	0.00220298	0.0333109		Isy1	0.36014	0.00401508	0.0500934
Btbd6	4.01299	0.0128546	0.1		Nup210	0.292614	0.000928754	0.0184111
Zfp386	5.79654	0.0156231	0.1		Il17ra	0.387728	0.0145445	0.1
Ly6c1	7.28283	4.19173e-05	0.00147603		Phb2	0.473187	0.000823331	0.016949
Zfp623	Inf	0.014147	0.1		Cd9	0.315837	0.00327858	0.0431157
Kifc2	Inf	0.014147	0.1		Klrb1a	0.222944	0.000310866	0.00836112
Xrcc6	6.24242	0.00662799	0.0680907		Clec2d	0.451833	8.80309e-05	0.00280459
Naa60	3.5671	0.00632113	0.0664628		Klre1	0.27868	1.0654e-07	6.336e-06
Ciita	Inf	0.014147	0.1		Klra4	0.330658	0.000323076	0.00847654
Ccdc191	Inf	0.00801247	0.0755026		Klra9	0.276026	0.0100173	0.0866272
Rnaset2b	11.5931	1.67132e-09	1.33515e-07		Klra7	0.264593	0.000535348	0.0123507
Acat2	2.67532	0.00523533	0.0592416		C2cd5	0.258145	0.00260561	0.0365242
Abca3	Inf	0.00456574	0.0538269		Ncr1	0.397119	2.61258e-06	0.000117508
Nubp2	4.45887	0.000417717	0.0103508		Rpl28	0.495543	1.1836e-11	1.62437e-09
Slc37a1	Inf	0.00801247	0.0755026		Apoe	0.383307	2.834e-05	0.00102593
Cyp4f13	5.12771	0.00209134	0.0324451		Tyrobp	0.205301	3.6869e-06	0.000160436
Vps52	2.35683	0.0125072	0.0991742		Zfp507	0.133766	0.0137307	0.1
H2-DMb1	Inf	0.014147	0.1		Selenos	0.494353	0.00209794	0.0324535
Ly6g5b	2.54156	0.00155893	0.0266579		Chsy1	0.231201	0.000318802	0.00847654
Gm8909	Inf	0.00801247	0.0755026		Mef2a	0.445887	0.000778574	0.0167322
AY036118	3.00974	0.0089714	0.0812487		Mrps11	0.429373	0.0113227	0.0929324
Rpl7l1	2.40779	0.00273094	0.0379661		Abhd2	0.489389	0.00706599	0.071008
Oard1	2.39665	0.00707116	0.071008		Gm26522	0	0.0139471	0.1
Slc35a4	2.10783	0.00726366	0.0725328		Picalm	0.388354	0.00218179	0.0331753
Pggt1b	Inf	0.00801247	0.0755026		Mrpl48	0.37983	0.00224157	0.0336068
Smad2	Inf	0.00456574	0.0538269		Numa1	0.472911	0.0065465	0.0677739
Rps6kb2	4.23593	0.0108464	0.0902858		Nup98	0.371573	0.0151329	0.1
Sfxn4	Inf	0.0015013	0.0259178		Rhog	0.493661	0.0128507	0.1
					Trim30a	0.35671	0.00810767	0.0756011
					Pde3b	0.40873	0.00308699	0.0411705
					Smg1	0.302566	0.000692832	0.0152604
					Pycard	0.480722	0.000481776	0.0114606
					Bub3	0.497735	0.00833451	0.0771785
					Polr2l	0.392806	0.000795303	0.0167588
					Tab2	0.378329	0.00137751	0.0248753
					Ltv1	0.250812	0.00880971	0.0806027
					Reps1	0.222944	0.0152027	0.1
					Cd164	0.490476	0.00236997	0.034191
					Ddx21	0.435012	0.00164933	0.027936
					Ccdc6	0.326984	0.0124928	0.0991742
					Fam207a	0.254793	0.00691338	0.0702316
					Cstb	0.390152	7.82711e-06	0.000322103
					Cdc34	0.27868	0.00825001	0.0766612
					Gadd45b	0.0636982	0.00119199	0.0223857
					Washc4	0.286642	0.0157592	0.1
					Tmem263	0.209829	0.00391532	0.0490777
					Ifng	0.245238	0.00849268	0.078249
					Cnot7	0.340973	0.00910572	0.0815806
					Slc25a4	0.483835	0.00322915	0.0427809
					Irf2	0.468182	0.00346599	0.0447017
					Upf1	0.397683	0.0010194	0.019913
					Otud4	0.222944	0.00461952	0.0538677
					Nlrc5	0.222944	0.000468511	0.011245
					Gm10073	0.115068	4.83574e-11	5.28215e-09
					Nfat5	0.315837	0.00327858	0.0431157
					Gse1	0.208081	0.00745324	0.0740117
					Zfpm1	0.102897	0.00130618	0.0238605
					Irf2bp2	0.316436	0.00179828	0.0296154
					Thoc7	0.491619	0.00556434	0.0611545
					Top2b	0.469355	0.00307139	0.0411705
					Zswim8	0.111472	0.000837388	0.0171068
					Smim4	0.477737	0.0158717	0.1
					AC160336.1	0.237807	0.0103266	0.0880367
					Gzmb	0.353345	0.00984156	0.0861603
					Mphosph8	0.474654	0.0154157	0.1
					Zc3h13	0.42242	0.00181898	0.0297731
					Sesn3	0.478513	0.00790162	0.0755026
					Chordc1	0.400389	0.000113102	0.00347908
					Sorl1	0.384687	8.60399e-05	0.00275757
					Cbl	0.423021	0.00139955	0.0249529
					Ddx6	0.42562	0.00139503	0.0249529
					Kmt2a	0.303583	7.88356e-06	0.000322103
					Rexo2	0.473187	0.00170139	0.0285467
					Rpl10-ps3	0.47481	2.67772e-07	1.46246e-05
					Herc1	0.359587	0.0014323	0.0253009
					Elovl5	0.36014	0.00422978	0.0521641
					Atp1b3	0.498345	0.00200336	0.0317239
					Cdv3	0.49543	0.00779538	0.0755026
					Drg1	0.392381	0.0104317	0.0883753
					Xpo1	0.263479	0.0011485	0.0217984
					Ppp4r3b	0.380316	0.00182459	0.0297739
					Clint1	0.473755	0.0111963	0.0925813
					Hnrnph1	0.487365	0.00355114	0.0455802
					Map2k4	0.243211	0.0153906	0.1
					Rabep1	0.247715	0.00465519	0.0541656
					Abr	0.387728	0.00648264	0.0675045
					Ssh2	0.358885	0.000374553	0.0096847
					Slfn1	0.326984	0.0124928	0.0991742
					Ccl5	0.426331	1.48499e-08	9.93519e-07
					Kpnb1	0.465274	0.0153667	0.1
					Ifi35	0.42242	0.0012506	0.0232419
					Polg2	0	0.0139471	0.1
					Bptf	0.45732	0.00140328	0.0249529
					Helz	0.346801	0.0077523	0.0755026
					Fasn	0.0743146	0.00562389	0.0613141
					Cd7	0.401299	8.17615e-07	3.94248e-05
					Metrnl	0.426501	0.0112365	0.0925813
					BC005537	0.332044	4.59189e-05	0.00157547
					Uqcrfs1	0.478916	0.000722762	0.0157725
					Tmem14c	0.45732	0.00233604	0.0339259
					Atxn1	0.363316	0.00460538	0.0538677
					Spin1	0.314744	0.00974014	0.0854632
					Sema4d	0.352016	0.000849559	0.0172692
					Zfp738	0.286642	0.0157592	0.1
					Erap1	0.362284	0.0149106	0.1
					Dhfr	0.0636982	0.0139634	0.1
					Gm10260	0.268998	1.06111e-27	5.67942e-24
					Erbin	0.32203	0.00887187	0.0809083
					Gzma	0.160887	0.00171333	0.0286332
					Itga2	0.0636982	0.0139634	0.1
					Emb	0.480186	0.0054248	0.0604044
					Hpcal1	0.418864	0.00336874	0.0438702
					Tspan13	0.499701	0.00424271	0.0522033
					Ifrd1	0.42562	0.00998222	0.0865936
					Baz1a	0.476638	0.0134286	0.1
					Togaram1	0.0990861	0.00755212	0.0743043
					Tmx1	0.492823	0.00376043	0.0474696
					Timm9	0.312121	0.00622207	0.0659458
					Vti1b	0.445887	0.00299295	0.0405552
					Zfp36l1	0.342378	0.00059087	0.0134576
					Erh	0.475613	0.00158288	0.0269813
					Gtf2a1	0.326984	0.0124928	0.0991742
					Foxn3	0.416162	0.000724921	0.0157725
					Ccdc88c	0.487365	0.0051451	0.0585922
					Ifi27l2a	0.273106	0.000189222	0.00547451
					Il7r	0.310183	0.000534796	0.0123507
					Mtmr12	0.240093	0.0130957	0.1
					Atad2	0.348955	0.00945534	0.0839274
					Plec	0.394439	0.00703208	0.071008
					Exosc4	0.432773	0.00284889	0.0391985
					Polr2f	0.490476	0.00204055	0.0321194
					Ddx17	0.496846	0.00892605	0.0811125
					Nlrc3	0.40873	0.0099506	0.0865936
					Nde1	0.297258	0.00700637	0.071008
					Parp14	0.405352	0.0107566	0.0898678
					Donson	0.222944	0.0152027	0.1
					Ttc3	0.490476	0.0102917	0.0879945
					Brwd1	0.202676	0.0101144	0.0870353
					Gtf2h5	0.481089	0.00433202	0.0526965
					Tulp4	0.304014	0.00330593	0.0433688
					Lnpep	0.222944	6.31682e-06	0.000268331
					Gm8186	0.40794	0.000263946	0.0072821
					Dusp1	0.308691	0.00223248	0.0335646
					Brd4	0.489038	0.0102121	0.087454
					Prrc2a	0.35671	0.00806486	0.0755093
					H2-Q6	0.461533	0.000441182	0.0107787
					H2-Q7	0.34718	1.25963e-09	1.05343e-07
					Gm26917	0.461687	2.73977e-07	1.48123e-05
					Gm42418	0.339167	3.10069e-16	3.31919e-13
					Cenpq	0.387728	0.00912397	0.0815806
					Twsg1	0.0636982	0.0139634	0.1
					Smchd1	0.445887	0.00470533	0.054512
					Birc6	0.352562	0.000286348	0.00785965
					Gm47283	0.436788	0.00233365	0.0339259
					Crem	0.222944	0.00544539	0.0604044
					Epc1	0.382189	0.00967544	0.085035
					Galnt1	0.330287	0.000637265	0.0143313
					Camk4	0.267532	0.0066416	0.0680998
					Arhgap26	0.247715	0.00667153	0.068276
					Eif1a	0.411588	0.00509854	0.0581857
					Malt1	0.318491	0.0052664	0.0594675
					Gstp1	0.195076	4.15406e-07	2.15863e-05
					Ppp1r14b	0.478916	0.0120306	0.0968301
					Zfp91	0.417121	0.00496264	0.0569995
					Carnmt1	0.35671	0.00806486	0.0755093
					Stambpl1	0.312121	0.0110736	0.0920335
					Tnks2	0.305081	0.00331577	0.0433915
					Hhex	0.222944	0.0100531	0.0867863
					Hells	0.205794	0.00912998	0.0815806
					Gbf1	0.297258	0.0134422	0.1
					Rps12-ps3	0.381422	5.58982e-07	2.74483e-05
					mt-Nd4l	0.382189	0.00216915	0.0330954

## Sheet: CD8
Up					Down
Name	FC	pVal	Qval		Name	FC	pVal	Qval
Imp4	5.13889	0.00199575	0.0368598		Atp6v1h	0.320069	0.0108725	0.0834118
Il18r1	5.07843	0.00365239	0.0506619		Pcmtd1	0.283395	0.000685241	0.0186472
Farsb	4.08088	0.00729992	0.0679755		Arfgef1	0.302288	0.00828729	0.0729283
Pycr2	11.7892	0.0048119	0.0548464		Phf3	0.39902	0.00867813	0.0745332
Sord	Inf	0.0139435	0.0908032		Zfp451	0.113358	0.0158744	0.0954912
Ift52	9.06863	0.0134909	0.0908032		Zap70	0.461117	0.000822726	0.020861
Gpkow	Inf	0.00783583	0.0695932		Mrpl30	0.425092	0.0165554	0.0977002
Cers2	4.08088	0.000613483	0.0181737		Tuba4a	0.272059	0.00923159	0.0767249
Coq3	Inf	0.0139435	0.0908032		Cul3	0.209276	0.0179835	0.1
Glipr2	2.47326	0.0126783	0.0908032		Sp110	0	0.000937164	0.0229836
Lrrc41	Inf	0.0139435	0.0908032		Sp140	0	0.00780317	0.0695932
Hectd3	Inf	0.0139435	0.0908032		Ppp1r7	0.24183	0.00636318	0.0620152
Khdrbs1	2.33193	0.00815884	0.0722227		Tmem37	0.266724	0.0143921	0.0918226
Mfsd10	Inf	0.0139435	0.0908032		Ddx18	0.207283	2.09223e-05	0.00149047
Gbp8	Inf	0.00783583	0.0695932		Mdm4	0.438805	0.0072691	0.0679663
Ubc	4.7555	2.16932e-10	1.62266e-07		Snrpe	0.429053	1.40052e-05	0.00113253
Rfc2	2.44853	0.0110945	0.0839036		Atp2b4	0.388655	0.0155486	0.0951358
Suclg2	Inf	0.00120895	0.0274029		Glrx2	0.334107	0.00838913	0.073608
Ttll3	Inf	0.0192585	0.1		Mpc2	0.362745	0.00953328	0.078578
Leng1	13.6029	0.000936407	0.0229836		Alyref2	0.100763	0.017601	0.098682
Kctd13	5.44118	0.0142856	0.0917222		Itpkb	0.405702	0.00137054	0.0296359
Kbtbd11	12.6961	0.00160744	0.0318775		Ppp2r5a	0.340074	0.0149492	0.093302
Mau2	2.22594	0.0202112	0.1		Traf5	0.100763	0.00351091	0.0506619
Prkcd	9.06863	0.00717082	0.067469		G0s2	0.0906863	0.00511344	0.0564047
Tpm3-rs7	4.14566	0.000193486	0.0079729		Taf3	0.283395	0.0169172	0.0986673
Pcca	Inf	0.0139435	0.0908032		Il1rn	0.113358	0.0158744	0.0954912
Casp1	2.56944	0.00526564	0.0566721		Ier5l	0.0906863	0.0172833	0.098682
2300009A05Rik	9.06863	0.0134909	0.0908032		Swi5	0.416265	9.30088e-05	0.00488215
Nt5e	Inf	0.0139435	0.0908032		Cdk9	0.340074	0.0174477	0.098682
Mybbp1a	8.16176	0.0125159	0.0908032		Psmb7	0.477296	0.012055	0.0891073
Rdm1	2.72059	0.0196553	0.1		Rbm43	0.181373	0.0149074	0.093302
Syngr2	2.22594	0.0172308	0.098682		Arl5a	0.259104	0.0207894	0.1
Narf	Inf	0.00783583	0.0695932		Rbms1	0.438805	0.0132435	0.0908032
Trappc12	8.16176	0.0125159	0.0908032		Eif3j1	0	0.0139058	0.0908032
Ddx24	2.16252	0.0158127	0.0954912		Slc24a5	0.24183	0.00982016	0.0791967
Tsta3	9.97549	0.0041061	0.0529547		Dut	0.373414	0.00159819	0.0318775
Bop1	9.06863	0.00717082	0.067469		Slc20a1	0.302288	0.00630484	0.0620152
Ttll12	Inf	0.00783583	0.0695932		Il1b	0.329768	0.00400443	0.0525495
Parp9	4.23203	0.0140398	0.0908032		Snrpb	0.464491	6.78166e-05	0.00382844
Lsamp	Inf	0.000694208	0.0186472		1700037H04Rik	0.181373	0.0149074	0.093302
Cd200	9.06863	9.1927e-06	0.000887245		Pcna	0.24183	0.00636318	0.0620152
Rnaset2b	18.1373	6.00339e-05	0.00356262		Edem2	0.151144	0.00895686	0.0752995
Cpsf7	Inf	0.00142114	0.029681		Romo1	0.494652	0.00694072	0.0663472
Ddb1	3.26471	0.0087898	0.074682		Prex1	0.453431	0.000429482	0.0147703
Cd6	2.23693	0.00553712	0.0589765		Kdm6a	0.24183	0.00982016	0.0791967
Anxa1	3.40074	0.0207635	0.1		Dock11	0.213379	0.00365669	0.0506619
					Ndufa1	0.496911	0.000521328	0.0164206
					Stag2	0.334107	0.0114963	0.0857783
					Rpl10	0.394288	0.0139716	0.0908032
					Fundc2	0.466387	0.0132585	0.0908032
					Pin4	0.192365	1.68271e-05	0.00125867
					Cox7b	0.484583	3.86424e-05	0.00256929
					P2ry10	0.251906	0.0047698	0.0548464
					Chm	0	0.0110293	0.0837557
					Fabp5	0.120915	0.00711524	0.067469
					Actl6a	0.286378	0.00410395	0.0529547
					Setd7	0.0604575	0.000682957	0.0186472
					Mbnl1	0.489364	6.66454e-09	2.49254e-06
					Mef2d	0.352669	0.0169698	0.098682
					Ssr2	0.41221	0.0168841	0.0986673
					Rit1	0	0.00439749	0.0542599
					Snapin	0.283395	0.00851869	0.0744474
					Psmd4	0.415645	0.000409054	0.0143987
					Mcl1	0.467172	0.0132577	0.0908032
					Mrps21	0.445746	0.000684003	0.0186472
					Dennd2d	0.266724	0.00516539	0.0564047
					Pkn2	0.440476	0.00738148	0.0681649
					Usp33	0	0.0139058	0.0908032
					Impad1	0	0.00363474	0.0506619
					Ndufb6	0.357249	0.00102968	0.0246466
					Tex10	0	0.00140651	0.0296359
					Rnf20	0.181373	0.0044782	0.0542599
					Txn1	0.481032	1.31245e-05	0.00111998
					Ugcg	0.167938	0.000114659	0.00544539
					Ptbp3	0.49286	0.00453349	0.0543843
					Plin2	0	0.0139058	0.0908032
					Klhl9	0.279035	0.0175686	0.098682
					Caap1	0.302288	0.0139295	0.0908032
					Plaa	0.226716	0.00601603	0.0614098
					Mysm1	0.236573	0.00183862	0.0353644
					Akirin1	0.302288	0.0095596	0.078578
					Zcchc17	0.302288	0.00258227	0.0438482
					Zdhhc18	0.395299	0.00432302	0.0542599
					Arid1a	0.357249	0.00226487	0.0400977
					Ddost	0.453431	0.0165296	0.0977002
					Fbxo42	0	0.00248498	0.0429773
					Zfp990	0	0.0139058	0.0908032
					Mad2l2	0.279035	0.0175686	0.098682
					Fosl2	0.0604575	0.00131392	0.0291868
					Nsd2	0.164884	0.0149938	0.093302
					Dhx15	0.370989	0.0129478	0.0908032
					Rbpj	0.348793	0.00639677	0.0621401
					Rpl9	0.478622	4.26056e-05	0.00271226
					Txk	0.416667	0.0102122	0.0814798
					Fryl	0.380297	0.00597044	0.0614098
					Cxcl2	0.117015	1.12325e-09	4.8011e-07
					Chfr	0.164884	0.0149938	0.093302
					Sbno1	0.496615	0.0140785	0.0908032
					Hip1	0.340074	0.0101017	0.0810307
					Trim56	0.251906	0.0047698	0.0548464
					Kdelr2	0.415645	0.0131409	0.0908032
					Bud31	0.481771	0.0167459	0.0982426
					Hsph1	0.32388	0.0029414	0.0460769
					Mdfic	0.388655	0.0171506	0.098682
					Lsm8	0.356268	0.00497826	0.0557556
					Ndufb2	0.28144	0.00134566	0.0296046
					Tra2a	0.385899	0.000532052	0.0165823
					Gprin3	0.194328	0.00744267	0.0685185
					Vamp5	0.24183	0.0140066	0.0908032
					Mob1a	0.418552	0.0201501	0.1
					Nfu1	0.320069	0.0150929	0.093302
					Thumpd3	0.226716	0.0128652	0.0908032
					Fkbp4	0.395299	0.00288161	0.0460769
					Clec2d	0.408088	7.31513e-06	0.000781676
					2310001H17Rik	0.497312	0.0206126	0.1
					Gabarapl1	0.113358	0.0158744	0.0954912
					Klrc2	0.373414	4.24171e-06	0.000528801
					Cdkn1b	0.425092	0.00819223	0.0723045
					Med21	0.32388	0.0029414	0.0460769
					Klhl42	0.181373	0.0044782	0.0542599
					Tmem238	0.181373	0.0149074	0.093302
					Zfp329	0.209276	0.0179835	0.1
					Apoe	0.302288	1.61465e-05	0.00123873
					Tbcb	0.440476	0.00476603	0.0548464
					Sdhaf1	0.100763	0.00900616	0.0752995
					Tsg101	0.370989	0.0160472	0.0960265
					Spty2d1	0	0.00140651	0.0296359
					Tubgcp5	0	0.00780317	0.0695932
					Slco3a1	0.164884	0.0149938	0.093302
					AU020206	0.379617	0.00155566	0.0316212
					Mrps11	0.226716	0.00881106	0.074682
					Isg20	0.21592	0.00441218	0.0542599
					Abhd2	0.373414	0.00568492	0.059892
					Tm6sf1	0.310924	0.000576434	0.0175989
					Ndufc2	0.465686	0.00871877	0.0745332
					Trim12c	0	0.0139058	0.0908032
					Smg1	0.266724	0.00516539	0.0564047
					Uqcrc2	0.465686	0.00591566	0.0614098
					Zfp646	0.0906863	0.0172833	0.098682
					5830432E09Rik	0	0.0139058	0.0908032
					Utrn	0.377859	0.0140655	0.0908032
					Sf3b5	0.4997	0.00627795	0.0620152
					Rwdd1	0.375254	6.07264e-05	0.00356262
					Ranbp2	0.24183	0.00982016	0.0791967
					Chchd10	0.100763	0.00036575	0.0130277
					2610008E11Rik	0.100763	0.017601	0.098682
					Uqcr11	0.421043	0.000333075	0.0120068
					Gadd45b	0.259104	0.010614	0.0822727
					1500009L16Rik	0	0.0139058	0.0908032
					Tmpo	0.425092	0.014396	0.0918226
					Nudt4	0.100763	0.00900616	0.0752995
					Dusp6	0.302288	0.00670992	0.0647616
					Llph	0.453431	0.00484483	0.0548464
					Arglu1	0.383673	0.000562867	0.0173619
					Ing1	0.197144	0.00061309	0.0181737
					Hook3	0.226716	0.00378796	0.0511189
					Dusp4	0	0.0063318	0.0620152
					Frg1	0.418552	0.0120534	0.0891073
					Casp3	0.317402	0.0151325	0.0933537
					Irf2	0.444876	0.00224302	0.0399472
					Upf1	0.253922	0.000988956	0.0238626
					Rex1bd	0.348793	0.00533672	0.0572312
					Otud4	0	0.000451379	0.0151745
					Junb	0.473146	0.0137019	0.0908032
					Rbl2	0.441176	0.00581717	0.0608566
					Nlrc5	0.405702	0.00113698	0.026577
					Cdh11	0.279035	0.0175686	0.098682
					Slc7a6os	0.151144	0.00499414	0.0557556
					Gm10073	0.259104	0.000311474	0.011365
					Mbtps1	0.129552	0.00523663	0.0566721
					Gse1	0.113358	0.0158744	0.0954912
					Coa6	0.283395	0.0169172	0.0986673
					Gng2	0.498775	0.00177976	0.0345782
					Wapl	0.425092	0.00715229	0.067469
					Tmem55b	0.320069	0.0198995	0.1
					Eef1akmt1	0.170037	0.00425978	0.0540054
					Spata13	0.226716	0.00378796	0.0511189
					Xpo7	0.0906863	0.00511344	0.0564047
					Esd	0.38473	0.00443887	0.0542599
					Lrch1	0.0906863	0.0103234	0.0814981
					Dnajc15	0.2687	0.000698319	0.0186472
					Wbp4	0.39902	0.0132886	0.0908032
					Pigyl	0.213379	0.00365669	0.0506619
					Ets1	0.493333	5.08273e-06	0.000608303
					Hinfp	0	0.0192197	0.1
					Ube4a	0.181373	0.00260861	0.0438482
					Timm8b	0.39902	0.015399	0.0948024
					Wdr61	0.320069	0.0150929	0.093302
					Herc1	0.32388	0.00227975	0.0401237
					Bcl2a1d	0.334107	0.0150589	0.093302
					Atr	0.0647759	0.00118273	0.0270133
					Nck1	0.315431	0.0166917	0.0981174
					Cdv3	0.335875	0.00953597	0.078578
					Acpp	0	0.0192197	0.1
					Mapkapk3	0.209276	0.0179835	0.1
					Ccrl2	0.408088	0.0186113	0.1
					Cmtm7	0.415645	0.00301004	0.0466635
					Tgfbr2	0.279035	0.0175686	0.098682
					Thoc5	0	0.0139058	0.0908032
					Purb	0.345472	0.017604	0.098682
					Ikzf1	0.488311	0.00910426	0.0758774
					Vps54	0.329768	0.00555861	0.0589765
					Ahsa2	0.170037	0.00267697	0.0440083
					Pex13	0.279035	0.0175686	0.098682
					Rtn4	0.351044	0.00245618	0.0427261
					Ccng1	0.492297	0.0166333	0.0979662
					Pwwp2a	0	0.00140651	0.0296359
					Med7	0.259104	0.010614	0.0822727
					Cnot6	0.266724	0.00516539	0.0564047
					Rapgef6	0.405702	0.00310141	0.0468515
					Atox1	0.465364	0.000143593	0.00650955
					Guk1	0.343982	0.00412405	0.0529579
					Mprip	0.100763	0.00900616	0.0752995
					Alkbh5	0.440476	0.00476603	0.0548464
					Naa38	0.421043	0.010466	0.0822727
					Tmem256	0.471569	0.00213088	0.0381773
					Slc16a11	0	0.0197258	0.1
					0610010K14Rik	0.151144	0.000506181	0.0162849
					Supt6	0.100763	0.017601	0.098682
					Synrg	0.302288	0.0196888	0.1
					Rnft1	0.209276	0.0122824	0.0900709
					Kat7	0	0.0063318	0.0620152
					Phb	0.317402	0.00521226	0.0566721
					Zfp652	0.317402	0.00979309	0.0791967
					Mlx	0.283395	0.0123894	0.0906338
					Kansl1	0.334107	0.0114963	0.0857783
					Fam104a	0.368413	0.00207176	0.0377971
					Nt5c	0.436638	0.00155067	0.0316212
					Grb2	0.174397	0.000466559	0.0153401
					Tmc6	0.238648	0.00185568	0.0353644
					Cbx4	0.388655	0.0194485	0.1
					Mrpl32	0.346742	0.000654587	0.0184767
					Hist1h4n	0.181373	0.0044782	0.0542599
					Hist1h4i	0.18893	0.00306857	0.0468515
					Hist1h2bg	0	0.0063318	0.0620152
					Hist1h1e	0.21592	0.00107161	0.0254465
					Hist1h1c	0.308719	0.000255498	0.00992793
					Hist1h4a	0	0.00439749	0.0542599
					BC005537	0.465058	0.00463224	0.0547814
					Prpf4b	0.355632	9.96265e-05	0.00505225
					Riok1	0.290196	0.00344566	0.0502899
					H2afy	0.401398	0.000211072	0.00853416
					Ndufs6	0.439262	0.000232825	0.00916598
					Slc12a7	0	0.0139058	0.0908032
					Arrdc3	0.0824421	0.00290374	0.0460769
					Gm10260	0.412001	1.59211e-10	1.58787e-07
					Gm10320	0.442886	0.0035603	0.0506619
					Tnpo1	0.226716	0.00881106	0.074682
					Ak6	0.0755719	0.0098798	0.0794635
					Erbin	0.320069	0.0150929	0.093302
					Gpbp1	0.414566	0.00417868	0.0534301
					Itsn2	0.492297	0.0186784	0.1
					Pum2	0.39902	0.0128009	0.0908032
					Smc6	0.370989	0.000305033	0.0112674
					Ralgapa1	0.164884	0.00864212	0.0745332
					Fbxo33	0.139517	0.0175267	0.098682
					Ppm1a	0.0824421	0.00290374	0.0460769
					Churc1	0.396752	0.0036574	0.0506619
					Fut8	0.170037	0.00425978	0.0540054
					Erh	0.423203	0.00870324	0.0745332
					Ahsa1	0.358527	0.000521374	0.0164206
					Yy1	0.418552	0.0172584	0.098682
					Siva1	0.302288	0.0139295	0.0908032
					Esyt2	0.234029	0.000299137	0.0111877
					Sp4	0.113358	0.0158744	0.0954912
					Rnf19a	0.0906863	0.0103234	0.0814981
					Zhx1	0	0.00439749	0.0542599
					Wdyhv1	0.0906863	0.0103234	0.0814981
					Ly6a	0.272059	0.00108523	0.0255671
					Ly6c2	0.302288	0.00407423	0.0529547
					Nol12	0.317402	0.00731553	0.0679755
					Ddx17	0.423203	0.00962785	0.0789222
					Ep300	0.201525	0.00131691	0.0291868
					Gxylt1	0.213379	0.00365669	0.0506619
					Arid2	0	0.00140651	0.0296359
					Kmt2d	0.302288	0.00461006	0.0547354
					Larp4	0.0906863	0.0103234	0.0814981
					1810013L24Rik	0.10669	0.00184733	0.0353644
					Socs1	0.266724	0.0108108	0.0831519
					Marf1	0.370148	0.000425294	0.0147703
					Dnm1l	0.0824421	0.00603424	0.0614098
					Mapk1	0.492297	0.0162549	0.0964976
					Polr2h	0.259104	0.010614	0.0822727
					Pak2	0.359866	1.09315e-05	0.00100358
					Iqcg	0	0.0110293	0.0837557
					Parp14	0.302288	0.00304848	0.0468515
					Dtx3l	0.181373	0.00260861	0.0438482
					Adprh	0.266724	0.00516539	0.0564047
					Ccdc80	0.390889	0.00696368	0.0663547
					Mir155hg	0.259104	0.0158939	0.0954912
					Sod1	0.292536	0.000595355	0.017993
					Cryzl1	0.266724	0.00772166	0.0695932
					Tmem181a	0.259104	0.010614	0.0822727
					Dynlt1a	0	0.0063318	0.0620152
					Dynlt1c	0	0.00780317	0.0695932
					Dynlt1f	0.181373	0.0149074	0.093302
					Igf2r	0.164884	0.0027533	0.0450158
					Lnpep	0.388655	0.00365569	0.0506619
					Itpr3	0.226716	0.0128652	0.0908032
					H2-Ke6	0.425092	0.0161928	0.0964449
					H2-Eb1	0.32388	0.0029414	0.0460769
					H2-Q6	0.310924	1.09866e-07	2.348e-05
					Ppp1r10	0.181373	0.000132778	0.00619589
					Rpp21	0.269225	6.00723e-07	9.98538e-05
					Gm26917	0.414905	5.05966e-07	9.46158e-05
					Gm42418	0.265083	3.0195e-12	4.51718e-09
					Nfkbie	0	0.00208551	0.0378173
					Mrpl14	0.343982	0.00331396	0.0490861
					Yipf3	0.39902	0.0128009	0.0908032
					Tomm6	0.370989	0.0129478	0.0908032
					Gm19585	0.259104	0.0158939	0.0954912
					Smchd1	0.480104	0.014345	0.0918226
					Gm47283	0.232529	1.78371e-05	0.00130167
					Map3k2	0.0824421	0.00603424	0.0614098
					Pfdn1	0.414566	0.00432911	0.0542599
					Cd14	0.0824421	0.00290374	0.0460769
					Zmat2	0.453431	0.0127052	0.0908032
					Rnmt	0	0.0121641	0.0896429
					Cndp2	0.164884	0.0149938	0.093302
					Ppp6r3	0.286378	0.0109451	0.0835783
					Tcirg1	0.0824421	0.00603424	0.0614098
					Gstp1	0.201525	1.10689e-05	0.00100358
					Grk2	0.426759	0.00736815	0.0681649
					Neat1	0.479097	0.00684881	0.0656785
					Tle4	0.209276	0.0179835	0.1
					Dock8	0.408088	0.0186113	0.1
					Tnks2	0.272059	0.00526556	0.0566721
					Got1	0.226716	0.0128652	0.0908032
					Mgea5	0.415645	0.0188147	0.1
					Dusp5	0.213379	0.00365669	0.0506619
					Zfp950	0.0755719	0.00626327	0.0620152

## Sheet: CD4
Up					Down
Name	FC	pVal	Qval		Name	FC	pVal	Qval
Ctdsp1	Inf	0.00437624	0.0811134		Cox5b	0.437292	0.000910646	0.0245175
Cd82	3.24419	0.00139093	0.0337885		Hspd1	0.354904	0.00668023	0.1
2023-09-06	3.66279	0.000924345	0.0245175		Clk1	0.436805	0.00110371	0.0276089
Rer1	2.6686	0.00396576	0.0777188		Pfdn2	0.4135	0.000743384	0.0218685
Snx17	4.7093	0.00686041	0.1		Celf2	0.368554	0.000865002	0.0237629
Bod1l	5.02326	6.83504e-05	0.00289985		Rpl35	0.34717	3.303e-17	5.08135e-14
Psmd9	4.7093	0.00686041	0.1		Dapl1	0.416083	0.00302751	0.0638017
Ubc	2.88098	1.56108e-05	0.000873296		1500011K16Rik	0.251163	0.00473974	0.0852731
Ahcyl2	Inf	0.000788294	0.0220493		Xist	0.476198	6.95779e-05	0.00289985
Tmem176b	Inf	0.000219952	0.00777873		Rpl36a	0.455005	5.08343e-11	1.56407e-08
Gprin3	Inf	0.00437624	0.0811134		Mrps21	0.313953	0.00196765	0.0455194
Wbp11	8.16279	0.00315681	0.0656276		Srpk2	0.313953	0.00551272	0.0952897
Smpdl3a	5.14884	0.000155394	0.0058307		Kmt2c	0.209302	0.00558008	0.0959151
Wdr18	Inf	0.00139467	0.0337885		Mrpl33	0.418605	0.000322579	0.0107935
Cirbp	3.89302	0.000432992	0.0135942		Rpl9	0.387536	7.75815e-08	8.84085e-06
Atp13a1	Inf	0.00246882	0.0542577		Pds5a	0.328904	0.00393954	0.0776999
Tbc1d4	Inf	0.000788294	0.0220493		Cxcl2	0.197342	4.39772e-05	0.00205014
Cdkn2d	7.53488	0.0054449	0.0946492		Cox6a1	0.488372	0.00110202	0.0276089
Vps11	Inf	0.00630714	0.1		Samd9l	0.193202	0.000776358	0.0220493
Tcrg-C2	Inf	0.00421211	0.0799989		Vamp8	0.37282	0.00263323	0.0566569
Cdip1	Inf	0.00630714	0.1		Zfp638	0.313953	0.00600808	0.1
Vps52	Inf	0.00246882	0.0542577		Ppp4r2	0.328904	0.00453475	0.0830509
Lonp1	Inf	0.00246882	0.0542577		Cdkn1b	0.191102	0.000747301	0.0218685
3110002H16Rik	Inf	0.00437624	0.0811134		H2afj	0.414867	0.000717144	0.0214224
Cd6	4.52093	0.00101964	0.0263633		Apoe	0.376744	0.00326007	0.0668705
					Gm9844	0.443228	0.000230388	0.00803656
					Hikeshi	0.25855	0.00274748	0.0587045
					Rgs10	0.412064	0.00476695	0.0852731
					Uqcr11	0.37282	0.00263323	0.0566569
					Kat6a	0.0627907	0.00299369	0.063524
					Gm10073	0.15222	2.5797e-05	0.0012802
					Vdac2	0.395349	0.00480628	0.0854797
					Olfr77	0.27907	0.00446459	0.0822554
					Sorl1	0.251163	0.00473974	0.0852731
					Ddx6	0.285412	0.00047621	0.0146521
					Atp5l	0.480164	1.06893e-05	0.000644881
					Ppib	0.266062	1.99122e-06	0.000145871
					Atox1	0.402504	0.00404965	0.0783646
					Psma2	0.478405	0.00243057	0.0542577
					BC005537	0.371036	0.00655334	0.1
					Gm10260	0.292812	3.56384e-21	1.09652e-17
					Smc6	0.406293	0.00114717	0.0284646
					Atp6v1d	0.132191	0.000272168	0.00930452
					Twf1	0	0.00419669	0.0799989
					Pak2	0.362254	0.00659991	0.1
					Iqcg	0	0.00233303	0.0531724
					Wtap	0.358804	0.00616431	0.1
					Lnpep	0.221614	0.00152545	0.036668
					Hnrnpm	0.336379	0.00407886	0.0784365
					Gm26917	0.477209	0.000217995	0.00777873
					Gm42418	0.328904	1.78523e-07	1.89407e-05
					Gm47283	0.128801	4.01031e-07	3.6291e-05
					Gstp1	0.0724508	5.60663e-05	0.00250007
					Rpl13a-ps1	0.45666	2.13422e-05	0.00109443
					Rps12-ps3	0.281476	9.9668e-06	0.000613318

## Sheet: DNT
Up					Down
Name	FC	pVal	Qval		Name	FC	pVal	Qval
Paqr8	Inf	0.0454731	0.0878406		Arfgef1	0.436253	0.0113555	0.0390523
Prim2	Inf	2.5958e-11	1.31999e-09		Terf1	0.463449	0.0381391	0.0835042
Hs6st1	Inf	0.000524282	0.00411011		Tmem131	0.259992	0.00692691	0.0283176
Cnnm4	Inf	0.0253105	0.0623042		Mgat4a	0.415075	0.0092992	0.0337115
Il1rl2	Inf	0.0454731	0.0878406		Map4k4	0.266834	3.16169e-05	0.000458766
Gm28826	Inf	0.0454731	0.0878406		Il1r1	0.391913	0.000951416	0.00664631
Rftn2	Inf	0.0454731	0.0878406		Tgfbrap1	0.200126	0.0232937	0.0621949
1700066M21Rik	Inf	0.0142692	0.0435595		Tpp2	0.49809	0.00910509	0.0331569
Gm20342	4.1804	0.00680136	0.027947		Gls	0.345614	0.000103664	0.00113703
Ccnyl1	Inf	0.0253105	0.0623042		Trak2	0.246308	0.0165801	0.0489297
Fn1	Inf	0.0142692	0.0435595		Cd28	0.326131	0.0217768	0.059152
D230017M19Rik	Inf	0.019593	0.0546132		Icos	0.355062	2.03646e-07	5.32162e-06
Cyp27a1	Inf	0.0253105	0.0623042		Ino80d	0.347308	0.00499691	0.0218642
Nhej1	Inf	0.000104952	0.00113703		Creb1	0.477493	0.0275001	0.066363
Glb1l	Inf	0.00267976	0.0139023		Ikzf2	0.414177	1.81605e-06	3.7548e-05
Speg	Inf	0.00465176	0.0206582		Usp37	0.258363	0.000869412	0.00632818
Tmem198	Inf	0.0454731	0.0878406		Ttll4	0.177889	0.0294044	0.0695805
Serpine2	Inf	0.00440117	0.0205817		Zfand2b	0.415075	0.0108714	0.0379488
Pid1	Inf	0.0253105	0.0623042		Cab39	0.406261	0.000537896	0.00419395
C130026I21Rik	Inf	0.00132698	0.0087195		Dgkd	0.379726	0.00232325	0.0130612
A530032D15Rik	Inf	0.0142692	0.0435595		St8sia4	0.350838	0.00780337	0.030169
Ackr3	Inf	0.000524282	0.00411011		2310035C23Rik	0.393229	0.0190121	0.0537369
Per2	Inf	0.00465176	0.0206582		Dbi	0.448145	0.000196737	0.00190803
Gpc1	Inf	2.13123e-05	0.000319834		Ccdc93	0.355779	0.0411287	0.0878406
9430060I03Rik	Inf	0.0253105	0.0623042		Mgat5	0.478933	0.00205825	0.0118912
Gm28187	Inf	0.00155047	0.00948161		Mdm4	0.492373	0.00889909	0.0326172
Cdh20	Inf	0.0253105	0.0623042		Rgs2	0.296482	0.00942111	0.0339789
Tnfrsf11a	Inf	3.6214e-05	0.00049255		Rgs1	0.166886	0.00107806	0.00738653
Zranb3	Inf	0.0454731	0.0878406		Fam129a	0.46106	0.000242672	0.00227838
Mcm6	2.11985	0.0123828	0.0417167		Smg7	0.311307	0.0148412	0.0448931
Thsd7b	Inf	0.0454731	0.0878406		Npl	0.363191	0.0265899	0.064692
Pfkfb2	Inf	0.0253105	0.0623042		Rnasel	0.453195	0.0140149	0.0435595
Chil1	Inf	0.0454731	0.0878406		Sft2d2	0.355779	0.0411287	0.0878406
Nav1	Inf	0.00465176	0.0206582		Dcaf6	0.304953	0.0139359	0.0435595
Phlda3	Inf	0.000900271	0.00632818		Uhmk1	0.444724	0.0339718	0.0765782
Rgl1	Inf	0.0454731	0.0878406		Fcer1g	0.376707	0.0216783	0.0590264
Tdrd5	Inf	0.000306079	0.00267438		Wdr26	0.478732	0.00628719	0.0263457
Dnm3	Inf	0.0454731	0.0878406		Mia3	0.482354	0.0140654	0.0435595
Atp1b1	Inf	0.0253105	0.0623042		Nenf	0.389133	0.0131594	0.0435595
Gm15853	Inf	0.0454731	0.0878406		Ints7	0.320201	0.0308851	0.071918
Fcgr2b	Inf	0.00155047	0.00948161		G0s2	0.0889447	6.9531e-05	0.000834731
Gm20045	Inf	1.25555e-05	0.000202483		Upf2	0.379323	0.000302874	0.00267438
Alyref2	4.1804	0.00711561	0.0288118		Ehmt1	0.480302	0.0416703	0.0878406
Cd244	Inf	0.00172924	0.0102852		Setx	0.444724	0.0293393	0.0695142
Slamf7	Inf	1.93561e-05	0.000300149		Ciz1	0.393229	0.0102311	0.036206
Fcrl6	Inf	0.0454731	0.0878406		Gapvd1	0.455188	0.0224205	0.0605799
Ifi213	Inf	0.00267976	0.0139023		Rpl35	0.293797	6.51114e-33	1.83759e-29
Rbm8a2	Inf	0.000900271	0.00632818		Orc4	0.398318	0.0061615	0.0259539
Zbtb18	Inf	0.0454731	0.0878406		Ola1	0.477337	0.00260015	0.0139023
B230369F24Rik	Inf	0.00811891	0.030169		Cir1	0.489196	0.00923971	0.0335605
Cdc42bpa	Inf	0.0142692	0.0435595		Wipf1	0.449665	0.000213713	0.00204803
Coq8a	Inf	0.00465176	0.0206582		Atp5g3	0.480837	2.46191e-07	6.40375e-06
Enah	Inf	0.0253105	0.0623042		Itga4	0.0547352	0.0429176	0.0878406
Dusp10	Inf	0.000306079	0.00267438		Celf1	0.432516	6.89823e-05	0.00083198
Hlx	Inf	0.0454731	0.0878406		Madd	0.486416	0.00527133	0.0228523
Batf3	Inf	0.0253105	0.0623042		Ckap5	0.364673	0.0442169	0.0878406
Gm26670	Inf	0.00811891	0.030169		Phf21a	0.449665	0.0172688	0.0503756
Suv39h2	Inf	0.00811891	0.030169		Hipk3	0.28907	0.0129296	0.0433111
Optn	Inf	0.000306079	0.00267438		Dnajc24	0.349849	0.0165848	0.0489297
Pfkfb3	Inf	2.16966e-08	7.07891e-07		Ccdc34	0.429027	0.0498911	0.0940169
Msrb2	Inf	8.36374e-07	2.02612e-05		Mga	0.436989	0.00763047	0.030169
Nsmf	Inf	0.000104952	0.00113703		Eif3j1	0.258363	0.00219999	0.0125432
Snapc4	Inf	1.25555e-05	0.000202483		Eid1	0.475661	0.0172845	0.0503934
Fam69b	Inf	0.0253105	0.0623042		Secisbp2l	0.351543	0.00221059	0.012579
Mrps2	Inf	1.86872e-07	4.92893e-06		Usp8	0.462513	0.0191767	0.0539861
Cercam	Inf	0.0142692	0.0435595		Sppl2a	0.49809	0.0286268	0.0681781
Phyhd1	Inf	0.000524282	0.00411011		Snrnp200	0.428552	0.0057359	0.0244901
Dolk	Inf	8.77e-08	2.55164e-06		Dusp2	0.465652	0.0451456	0.0878406
Asb6	3.64673	7.49739e-05	0.000887182		Anapc1	0.355779	0.00886195	0.0325021
Garnl3	Inf	0.0454731	0.0878406		Il1b	0.237186	0.000605329	0.00464232
Psmd5	2.22362	0.0154088	0.0462136		Mavs	0.339607	0.0430242	0.0878406
Gsn	3.91357	0.0128592	0.0431272		Plcb4	0.207538	0.00162039	0.00985584
Stom	Inf	0.0454731	0.0878406		Tasp1	0.470136	0.0129378	0.0433111
Dab2ip	Inf	0.0253105	0.0623042		Snx5	0.454427	6.9654e-05	0.000834731
Nr6a1	Inf	0.0454731	0.0878406		Ralgapb	0.326131	0.0130776	0.0435595
Kif5c	Inf	3.6214e-05	0.00049255		Sdc4	0.479833	0.0115909	0.039649
Cd302	Inf	0.0253105	0.0623042		Zmynd8	0.469628	0.0215214	0.0587052
Ifih1	Inf	0.000900271	0.00632818		Cebpb	0.414352	0.00147126	0.00948161
Cobll1	Inf	3.6214e-05	0.00049255		Dpm1	0.43837	0.00274471	0.0141225
Fastkd1	Inf	0.000900271	0.00632818		Stx16	0.461828	0.000167669	0.00170215
Erich2	Inf	0.00267976	0.0139023		Gm14305	0.256951	0.0254281	0.0625392
Fkbp7	Inf	0.00811891	0.030169		Dido1	0.355779	0.00336891	0.0167244
Ube2l6	4.1804	0.00680136	0.027947		Kdm6a	0.270255	0.000536326	0.00419288
Olfr73	Inf	0.00811891	0.030169		Wdr44	0.477493	0.0199151	0.0553198
Ptprj	Inf	0.0338612	0.0765428		C330007P06Rik	0.372456	0.0107261	0.0375344
Rapsn	Inf	0.00134875	0.00882543		Upf3b	0.382732	0.00117871	0.00793932
Spi1	Inf	7.40353e-06	0.000128581		Sh2d1a	0.118593	0.0306638	0.0716985
A330069E16Rik	Inf	0.000458182	0.00377418		Stk26	0.324013	0.0168087	0.0494143
Gm10801	Inf	9.01539e-07	2.08553e-05		Mbnl3	0.28907	0.0442565	0.0878406
Gm10800	10.2286	4.47205e-11	2.17605e-09		Cd40lg	0.412497	7.17101e-05	0.000853932
Commd9	2.93518	0.01518	0.0456975		Rpl10	0.413935	0.000102347	0.00113703
Gm10912	Inf	0.0253105	0.0623042		Prkx	0.422487	0.0448442	0.0878406
Cd59a	Inf	0.00811891	0.030169		Klhl15	0.152477	0.0246483	0.0623042
Pax6	Inf	0.0454731	0.0878406		Zxdb	0.148241	0.0368939	0.0814733
Mpped2	Inf	3.11575e-08	9.77039e-07		Pin4	0.444724	0.00118279	0.0079573
Olfr1295	Inf	0.0253105	0.0623042		Hdac8	0.284623	0.0230019	0.0616491
Chst14	Inf	0.0142692	0.0435595		Xist	0.477452	3.34173e-19	3.69847e-17
Rpusd2	Inf	0.0454731	0.0878406		Magt1	0.416134	0.00186125	0.0109207
Rad51	Inf	0.00267976	0.0139023		P2ry10	0.484255	0.0346674	0.0777117
Stard9	Inf	0.000900271	0.00632818		Hmgn5	0.497044	0.0468141	0.0896522
Lcmt2	Inf	0.000900271	0.00632818		Rpl36a	0.419288	1.3442e-21	2.10757e-19
Sord	4.53618	0.00294035	0.0149385		Bhlhb9	0.396208	0.0443836	0.0878406
Shf	Inf	0.00811891	0.030169		Bex3	0.480725	0.00289544	0.0147902
Gm14085	Inf	0.00267976	0.0139023		Gm15013	0.105116	0.00270996	0.0140075
Sqor	Inf	1.36553e-08	4.64318e-07		Huwe1	0.363403	0.000160169	0.00164376
Hdc	Inf	0.00267976	0.0139023		Mbtps2	0.299178	0.0318427	0.0734696
Zfp661	Inf	0.0454731	0.0878406		Piga	0.256951	0.0253023	0.0623042
Stk35	Inf	0.000179069	0.00176703		Msl3	0.392839	0.0342599	0.0770431
Ubox5	Inf	0.000524282	0.00411011		C030034L19Rik	0.432864	0.0369439	0.0815516
Slc23a2	3.73568	0.0181052	0.0521663		Pag1	0.491314	0.028965	0.0688094
AV099323	Inf	0.0253105	0.0623042		Pde7a	0.390889	0.000207958	0.00199967
Rin2	Inf	0.0454731	0.0878406		Hps3	0.492161	0.0469563	0.0898449
Thbd	Inf	0.0454731	0.0878406		Hltf	0.308966	0.00345629	0.0170714
Napb	Inf	0.0113769	0.0390523		Gyg	0.435361	0.0117293	0.0400031
Nanp	Inf	0.0253105	0.0623042		Tbl1xr1	0.315013	0.00136725	0.00891151
Sdcbp2	Inf	3.6214e-05	0.00049255		Mynn	0.464489	0.0143085	0.0436323
Mcts2	Inf	0.00267976	0.0139023		Phc3	0.42177	0.00208356	0.0120051
E2f1	Inf	0.0066257	0.0273981		Fxr1	0.479528	0.0136994	0.0435595
Ahcy	Inf	0.0454731	0.0878406		Atp11b	0.283939	0.00256741	0.0139023
Ggt7	Inf	0.0454731	0.0878406		4932438A13Rik	0.416423	0.00476703	0.0210867
Cnbd2	Inf	0.0253105	0.0623042		Noct	0.0533668	0.0340456	0.0766527
Fitm2	Inf	0.0253105	0.0623042		Elf2	0.434461	0.00547177	0.0235944
Pkig	Inf	0.00132698	0.0087195		Mbnl1	0.453925	1.02548e-10	4.79078e-09
Dbndd2	Inf	0.0253105	0.0623042		Dhx36	0.444724	0.00404649	0.0192744
Pard6b	Inf	0.00811891	0.030169		Ssr3	0.413696	0.000280562	0.00257737
Aurka	Inf	0.0253105	0.0623042		Mef2d	0.355779	0.00640753	0.0267112
Gm14455	Inf	0.0454731	0.0878406		Ube2q1	0.499785	0.0248695	0.0623042
Gm20721	Inf	1.75951e-10	7.94518e-09		Rps27	0.446925	9.62576e-11	4.60441e-09
Zfp831	Inf	0.000306079	0.00267438		Slc39a1	0.362621	0.00343905	0.0170127
Gm14391	Inf	0.0454731	0.0878406		S100a8	0.27492	0.0154849	0.0463925
Zfp968	Inf	6.16082e-05	0.000754325		S100a9	0.123534	0.00106659	0.00733292
Gm14295	Inf	0.000306079	0.00267438		Gabpb2	0.499785	0.0248695	0.0623042
Zfp970	Inf	0.0253105	0.0623042		Rprd2	0.372721	0.00479038	0.0211078
Fam217b	Inf	0.0454731	0.0878406		Rnf115	0.442606	0.00110679	0.00753583
Cables2	Inf	6.16082e-05	0.000754325		Notch2	0.412795	0.0047827	0.0211078
Uckl1os	Inf	0.00465176	0.0206582		Man1a2	0.489196	0.0313335	0.0726922
Tcea2	Inf	0.00465176	0.0206582		Ptgfrn	0.2866	0.0318774	0.0734696
Gata1	Inf	0.0142692	0.0435595		Trim33	0.419311	0.0282139	0.0674225
Cybb	Inf	0.0454731	0.0878406		AI504432	0.420466	0.0175493	0.0510336
Cask	Inf	0.00811891	0.030169		Rbm15	0.471407	0.0153061	0.0459788
Zfp300	Inf	0.0113769	0.0390523		Taf13	0.463449	0.0233648	0.0623042
Lonrf3	Inf	0.0454731	0.0878406		Usp53	0.306365	0.0371912	0.0817905
Slc25a43	Inf	0.00811891	0.030169		Lef1	0.293518	0.0247887	0.0623042
Hs6st2	Inf	0.0142692	0.0435595		Ppa2	0.426935	0.0168817	0.0495113
Xlr	Inf	0.00155047	0.00948161		Tet2	0.243428	0.00224572	0.0127012
Prrg1	Inf	4.01584e-06	7.40757e-05		Nfkb1	0.47311	0.00121716	0.00815936
Gk	Inf	0.000900271	0.00632818		Dnajb14	0.283511	0.0180353	0.0521375
Zc4h2	Inf	0.000179069	0.00176703		Hs2st1	0.473186	0.0114871	0.0393436
Gm4779	Inf	0.0142692	0.0435595		Dnajb4	0.345896	0.0494619	0.0933729
Rtl5	Inf	0.000306079	0.00267438		Trp53inp1	0.323435	0.00273428	0.0140817
Slc16a2	Inf	0.0142692	0.0435595		Tmem64	0.427896	2.97078e-08	9.36782e-07
Uprt	Inf	0.019593	0.0546132		Smim8	0.470884	0.0264942	0.0645424
Magee1	Inf	0.00811891	0.030169		B4galt1	0.41572	0.000147414	0.00152954
Tlr13	Inf	0.0454731	0.0878406		Creb3	0.441166	0.00972558	0.0348065
Gm5127	Inf	0.0454731	0.0878406		Tmem245	0.389988	0.0391737	0.0850437
Gpr174	Inf	0.00465176	0.0206582		Txn1	0.478139	8.35449e-10	3.34443e-08
Cldn34c1	Inf	0.0142692	0.0435595		Pole3	0.486019	0.0104505	0.036821
Gprasp2	Inf	0.0253105	0.0623042		Kdm4c	0.388122	0.0417175	0.0878406
Bex2	Inf	0.0253105	0.0623042		Plin2	0.407919	0.00842284	0.0310937
Kir3dl2	Inf	0.019593	0.0546132		Dennd4c	0.372456	0.010649	0.0373107
Amot	Inf	0.0454731	0.0878406		Mllt3	0.424958	0.00853761	0.0314762
A230072E10Rik	Inf	0.00267976	0.0139023		Focad	0.222362	0.0242311	0.0623042
Fam120c	Inf	0.00155047	0.00948161		Plaa	0.449405	0.0141687	0.0435595
Ribc1	Inf	0.0253105	0.0623042		Mrpl37	0.314271	0.0170473	0.0498354
Mageh1	Inf	0.0113769	0.0390523		Lrrc42	0.275729	0.00252288	0.0139023
Cdkl5	Inf	0.0454731	0.0878406		Zcchc11	0.489196	0.00281794	0.0144466
Siah1b	Inf	0.0142692	0.0435595		Btbd19	0.439782	0.0217464	0.0590978
Fancb	Inf	0.0454731	0.0878406		Szt2	0.255716	0.0350391	0.0782474
Mid1	Inf	0.0454731	0.0878406		Smap2	0.465993	0.00152556	0.00948161
Zbtb10	Inf	0.0454731	0.0878406		Macf1	0.47649	0.000141363	0.00147216
Chmp4c	Inf	0.0253105	0.0623042		Rragc	0.385427	0.0236002	0.0623042
Car3	Inf	0.0290133	0.0688952		Marcksl1	0.228715	0.0415222	0.0878406
Sirpb1c	Inf	0.0253105	0.0623042		Txlna	0.435829	0.01875	0.0532187
Fndc3b	Inf	0.00811891	0.030169		Ptp4a2	0.495226	9.05262e-07	2.08559e-05
Pld1	Inf	3.6214e-05	0.00049255		Ythdf2	0.453618	0.00330601	0.0164992
Eif5a2	Inf	0.00155047	0.00948161		Atpif1	0.417771	0.00012867	0.00135751
Gm33051	Inf	0.00465176	0.0206582		Wasf2	0.49761	0.00742848	0.0298219
Gpr160	Inf	0.00386849	0.0186151		Zdhhc18	0.424039	0.000193047	0.00187546
Prkci	3.29095	0.0443983	0.0878406		Pigv	0.284623	0.0230019	0.0616491
Gm15952	Inf	0.0253105	0.0623042		Luzp1	0.275729	0.0213277	0.0582756
Bbs12	Inf	0.00155047	0.00948161		C1qb	0.244598	0.0323534	0.0740588
Gm5148	Inf	0.0142692	0.0435595		Hp1bp3	0.453769	4.8951e-05	0.000647106
Slc7a11	Inf	0.0253105	0.0623042		Akr7a5	0.462513	0.0190892	0.0538741
Nbea	Inf	0.0253105	0.0623042		Zfp990	0.402867	0.0179202	0.0518715
Mme	Inf	0.0454731	0.0878406		Kif1b	0.455312	0.000698266	0.00526915
Kcnab1	Inf	0.0454731	0.0878406		Rere	0.294202	0.0249392	0.0623042
Serpini1	Inf	0.0066257	0.0273981		Camta1	0.489196	0.0183922	0.0527509
Mex3a	Inf	0.00465176	0.0206582		Cdk6	0.336013	0.00658237	0.0273391
Gm17146	Inf	0.0253105	0.0623042		Gtpbp10	0.228715	0.0415222	0.0878406
Hcn3	Inf	0.0454731	0.0878406		Rsbn1l	0.428793	7.03935e-06	0.000124166
Gm35439	Inf	0.000306079	0.00267438		Lrrc17	0.28907	0.0448724	0.0878406
Gm9774	4.62513	0.00236683	0.0132666		Fam126a	0.255716	0.0352152	0.0785343
B230398E01Rik	Inf	0.0253105	0.0623042		Slc4a2	0.250157	0.00407559	0.0193477
A730011C13Rik	Inf	0.0253105	0.0623042		Abcf2	0.481348	0.0401472	0.0868231
Gm15265	Inf	0.0142692	0.0435595		Chpf2	0.371951	0.0366655	0.0810995
Gm16740	Inf	0.0142692	0.0435595		Rbm33	0.332372	0.00468775	0.0207853
C920021L13Rik	Inf	0.00465176	0.0206582		Ube3c	0.425664	0.0424446	0.0878406
BC028528	Inf	0.00267976	0.0139023		Fosl2	0.168995	2.77837e-05	0.000407333
Gm17690	Inf	0.00267976	0.0139023		Gm1673	0.0177889	0.000286114	0.00261468
Gm20633	Inf	0.0253105	0.0623042		Mxd4	0.454766	3.45717e-05	0.00049255
Hist2h2aa1	Inf	0.0253105	0.0623042		Fam193a	0.331072	0.00903968	0.033014
Fcgr1	Inf	0.0454731	0.0878406		Htt	0.412958	0.0267696	0.065016
Ankrd35	Inf	5.94746e-10	2.41512e-08		Rpl9	0.275773	5.81329e-19	6.1911e-17
Pias3	Inf	1.72979e-14	1.23591e-12		Tec	0.320201	0.0491133	0.0928079
Hmgcs2	Inf	0.0253105	0.0623042		Fryl	0.353555	7.02256e-05	0.000839797
Tspan2	Inf	0.0454731	0.0878406		Clock	0.424958	0.0184313	0.0528362
Dennd2c	Inf	0.00811891	0.030169		Grsf1	0.374838	0.0270681	0.0654928
Phtf1os	Inf	0.0454731	0.0878406		Cxcl2	0.104192	4.05675e-11	1.99114e-09
Magi3	Inf	0.000104952	0.00113703		Cxcl10	0.0296482	0.0392377	0.0851496
Lrig2	Inf	1.29644e-05	0.000206713		Cnot6l	0.374091	0.000395419	0.00335123
4933431E20Rik	Inf	0.000900271	0.00632818		BC005561	0.435361	0.0226691	0.0610469
Gstm1	Inf	0.00811891	0.030169		Gbp9	0.334217	0.000649663	0.00496882
Gstm4	Inf	5.33318e-07	1.33198e-05		Lrrc8d	0.255716	0.0350391	0.0782474
Cyb561d1	Inf	2.13123e-05	0.000319834		Evi5	0.346884	0.03822	0.0835524
Atxn7l2	Inf	0.000104952	0.00113703		Fam69a	0.43837	0.0337824	0.0765428
Psrc1	Inf	0.0338612	0.0765428		Ep400	0.455842	0.0110894	0.0384717
Celsr2	Inf	0.0253105	0.0623042		Git2	0.407663	3.50238e-05	0.00049255
Sec24d	Inf	6.55705e-08	1.94794e-06		Oasl2	0.0533668	0.0340456	0.0766527
Ank2	Inf	1.25555e-05	0.000202483		Sppl3	0.308966	0.00524728	0.0227831
Zgrf1	Inf	0.0142692	0.0435595		Pop5	0.49761	3.39427e-05	0.000485032
Tifa	Inf	0.0454731	0.0878406		Med13l	0.21742	0.000348948	0.00299862
Mcub	Inf	0.0142692	0.0435595		Atxn2	0.308342	0.0160642	0.0477731
Cyp2u1	Inf	0.00465176	0.0206582		Atp2a2	0.471794	0.0419232	0.0878406
Slc39a8	Inf	1.60373e-09	6.24287e-08		Mlxip	0.329095	0.0331836	0.0755863
Bank1	Inf	0.0253105	0.0623042		Mphosph9	0.28907	0.0434613	0.0878406
Ssx2ip	Inf	0.000104952	0.00113703		Cdk2ap1	0.385427	0.0157191	0.0469297
Spata1	Inf	0.019593	0.0546132		Rilpl2	0.497535	0.00789985	0.030169
Cryz	Inf	0.00811891	0.030169		Atp6v0a2	0.355779	0.0060763	0.0256168
Fam110b	Inf	0.0454731	0.0878406		Zfp664	0.383867	0.00908789	0.0331156
Mmp16	4.53618	2.14185e-12	1.23363e-10		Gtf2i	0.41804	0.0111254	0.0385494
Klhl32	Inf	0.00811891	0.030169		BC037034	0.483859	0.0134334	0.0435595
Manea	Inf	3.6214e-05	0.00049255		Ints1	0.339607	0.0276788	0.0665181
Ankrd6	Inf	9.01539e-07	2.08553e-05		Cdk8	0.292247	0.0123125	0.0415652
Gm13305	Inf	0.0253105	0.0623042		Rpl21	0.426935	6.31426e-06	0.000112077
Unc13b	Inf	0.0454731	0.0878406		Pan3	0.370603	0.00219955	0.0125432
AL732506.1	Inf	0.0454731	0.0878406		Pomp	0.467955	3.36627e-08	1.044e-06
Car9	Inf	0.0454731	0.0878406		Ubl3	0.464248	0.0082387	0.0305137
Reck	Inf	0.0454731	0.0878406		Hsph1	0.327087	0.000218419	0.00208605
1700055D18Rik	Inf	0.0142692	0.0435595		Pds5b	0.305747	0.00478779	0.0211078
Fbxo10	Inf	0.0454731	0.0878406		Samd9l	0.383382	2.23045e-05	0.00033141
Tdrd7	Inf	0.000306079	0.00267438		Bet1	0.487925	0.00497822	0.0218162
Tbc1d2	Inf	0.0253105	0.0623042		Casd1	0.311307	0.016225	0.0480992
Zfp189	Inf	0.0253105	0.0623042		Wasl	0.483637	0.0485718	0.0920873
Slc44a1	Inf	2.30326e-08	7.42894e-07		Ube2h	0.426193	0.012565	0.0422409
Akap2	Inf	0.00465176	0.0206582		Mkln1	0.465054	0.00336758	0.0167244
E130308A19Rik	Inf	0.000179069	0.00176703		Luc7l2	0.498699	3.36979e-06	6.34021e-05
Ccdc171	Inf	0.000104952	0.00113703		Slc37a3	0.470884	0.0360295	0.0800972
Acer2	Inf	0.0454731	0.0878406		Zfp398	0.304285	0.0239655	0.0623042
Gm26867	Inf	0.0253105	0.0623042		Malsu1	0.439782	0.0153497	0.0460852
Cdkn2b	Inf	0.00267976	0.0139023		Tra2a	0.48111	0.00134163	0.00880552
Dock7	Inf	0.0454731	0.0878406		Znrf2	0.364901	0.000178748	0.00176703
Itgb3bp	Inf	4.29623e-16	3.73074e-14		Ppm1k	0.388548	0.0135863	0.0435595
E130102H24Rik	Inf	1.86872e-07	4.92893e-06		Herc3	0.372456	0.0230659	0.0617621
Podn	Inf	0.00155047	0.00948161		Cd8a	0.315907	0.0340257	0.0766527
Btf3l4	Inf	0.00465176	0.0206582		Rmnd5a	0.210659	0.00226734	0.0127596
Mknk1	2.28291	0.0435186	0.0878406		Kcmf1	0.381192	0.0192145	0.0540117
Tesk2	Inf	0.00155047	0.00948161		Mob1a	0.469811	0.00273085	0.0140768
Tctex1d4	Inf	0.0253105	0.0623042		Zfp638	0.423254	0.00166897	0.0100645
Ipo13	Inf	1.86872e-07	4.92893e-06		C87436	0.385427	0.00773679	0.030169
Slc2a1	3.73568	0.0187796	0.0532346		Mxd1	0.254128	0.00466455	0.0206987
Rims3	Inf	0.00465176	0.0206582		Aak1	0.472327	0.004007	0.0191024
Zfp69	Inf	0.0253105	0.0623042		Nup210	0.432595	0.000189655	0.00184641
Trit1	4.09146	0.00869415	0.0319698		Vhl	0.339607	0.0278989	0.0668964
Rcc1	Inf	3.6214e-05	0.00049255		Tatdn2	0.275729	0.0214283	0.0584869
Sesn2	Inf	0.0142692	0.0435595		Plxnd1	0.381939	0.0200456	0.0556548
Ptafr	Inf	0.00267976	0.0139023		Kdm5a	0.468981	0.00414368	0.0195534
Fgr	Inf	0.0454731	0.0878406		Pex5	0.324013	0.0103757	0.0366032
Gm26615	Inf	0.0142692	0.0435595		Atn1	0.486855	0.0302304	0.070841
Sfn	Inf	0.00155047	0.00948161		Ptms	0.425998	0.0151612	0.0456819
Zfp683	Inf	0.0454731	0.0878406		Clec2d	0.496038	0.000539663	0.00420152
Pafah2	Inf	0.00465176	0.0206582		Cd69	0.107475	0.00520436	0.0226461
Hmgcl	2.29033	0.0186485	0.053135		Klrd1	0.333543	0.0208749	0.0572786
Wnt4	Inf	0.00155047	0.00948161		Crebl2	0.321569	0.021798	0.0591813
2810405F17Rik	Inf	0.000104952	0.00113703		Cdkn1b	0.43837	0.00102529	0.00710084
Tmco4	Inf	1.25555e-05	0.000202483		Aebp2	0.268395	1.53526e-06	3.22899e-05
Aldh4a1	Inf	0.000524282	0.00411011		Itpr2	0.465901	0.00144913	0.00940178
Crocc	Inf	0.0142692	0.0435595		Mboat7	0.361709	0.0187418	0.0532187
Gm13075	Inf	0.0142692	0.0435595		Ppp1r12c	0.331072	0.00604877	0.0255745
Casp9	Inf	2.58023e-06	4.98766e-05		Ppp6r1	0.471078	0.0100625	0.0357215
Gm13166	Inf	0.00155047	0.00948161		Tmem238	0.311307	0.0463261	0.0891549
Zfp982	Inf	0.0142692	0.0435595		Zfp444	0.412958	0.0380355	0.083342
Zfp984	Inf	0.0142692	0.0435595		Relb	0.383574	0.0338661	0.0765428
Gm20707	Inf	0.0454731	0.0878406		Apoe	0.324783	1.53886e-06	3.22899e-05
Zfp933	Inf	0.000104952	0.00113703		Gm9844	0.484465	3.5826e-06	6.7182e-05
Ubiad1	Inf	1.52475e-06	3.22899e-05		Supt5	0.452572	0.00195128	0.0113312
Arhgef16	Inf	0.00811891	0.030169		Nfkbib	0.4479	0.0140981	0.0435595
1500002C15Rik	Inf	0.00811891	0.030169		Zfp30	0.0889447	0.0415818	0.0878406
Tmem240	Inf	0.0454731	0.0878406		Tyrobp	0.342437	0.00414663	0.0195534
Vwa1	Inf	0.0253105	0.0623042		4931406P16Rik	0.244598	0.0146057	0.0443709
Pusl1	2.71281	0.030226	0.070841		2410002F23Rik	0.360014	0.00597768	0.0253309
C1qtnf12	Inf	5.42213e-12	3.00048e-10		Spty2d1	0.439165	0.0439186	0.0878406
Rundc3b	Inf	6.16082e-05	0.000754325		Cyfip1	0.397286	0.0364191	0.0807407
Abcb1a	Inf	0.00155047	0.00948161		Ube3a	0.477397	0.000748894	0.00561366
Gm8953	Inf	0.00811891	0.030169		Slco3a1	0.487343	0.000739557	0.00555105
Cd36	Inf	0.00226357	0.0127585		Isg20	0.415075	0.0365368	0.0809062
Prkag2	Inf	1.86872e-07	4.92893e-06		Abhd2	0.418563	0.000303685	0.00267438
1700096K18Rik	Inf	0.000779187	0.00577175		Polg	0.49809	0.0287433	0.0683417
Lmbr1	Inf	0.00267976	0.0139023		Sema4b	0.450653	0.000223328	0.00212574
Mapre3	4.00251	0.0105901	0.0371275		Man2a2	0.412111	0.00217738	0.0124646
Slc5a6	Inf	0.00465176	0.0206582		Furin	0.444724	0.0474121	0.0904
Uvssa	2.20583	0.0142051	0.0435595		Wdr73	0.339607	0.0277888	0.0667173
Wfs1	Inf	0.00155047	0.00948161		Hikeshi	0.495549	0.00693025	0.0283176
Zbtb49	Inf	0.000104952	0.00113703		Crebzf	0.436638	0.0093376	0.0337856
Zfp518b	Inf	0.00386849	0.0186151		Trim30a	0.47649	0.00530091	0.0229453
Tlr1	Inf	2.37955e-06	4.69624e-05		Fam160a2	0.426935	0.000662896	0.0050495
Wdr19	Inf	0.0454731	0.0878406		Dennd5a	0.324013	0.0244924	0.0623042
Ugdh	3.60226	0.00158302	0.00967021		Ipo7	0.428046	0.020091	0.0557453
N4bp2	Inf	2.13123e-05	0.000319834		Far1	0.482174	0.0286849	0.0682878
Cnga1	Inf	0.000158999	0.00163472		Pde3b	0.313424	0.00119307	0.00800741
Rasl11b	Inf	0.0142692	0.0435595		Smg1	0.378015	0.00363302	0.0177544
Cep135	Inf	2.13123e-05	0.000319834		Mosmo	0.250662	0.0122519	0.0414102
Hopxos	Inf	0.0454731	0.0878406		Ubfd1	0.435361	0.0291283	0.0691391
Csn3	Inf	0.00267976	0.0139023		Tnrc6a	0.370603	0.00162978	0.00990227
Cdkl2	Inf	0.0142692	0.0435595		Lcmt1	0.492161	0.0463778	0.0892218
Anxa3	Inf	0.0454731	0.0878406		Spns1	0.405193	0.0147534	0.0446992
Gm8013	Inf	0.0454731	0.0878406		Zfp688	0.376305	0.0232164	0.0620766
4930524J08Rik	Inf	0.0454731	0.0878406		Bcl7c	0.372606	0.000352714	0.00302105
Hpse	Inf	0.000524282	0.00411011		Rgs10	0.440231	2.57702e-06	4.98766e-05
Abcg3	Inf	1.99684e-10	8.80551e-09		Plekha1	0.378015	0.029946	0.0705755
Gbp8	16.1879	2.31428e-20	2.96882e-18		Ikzf5	0.444724	0.0438503	0.0878406
Gbp10	Inf	0.00811891	0.030169		Fam53b	0.482174	0.0370329	0.0815887
Gm10419	Inf	0.0454731	0.0878406		Fuom	0.403216	0.0382351	0.0835524
Pxmp2	Inf	0.00267976	0.0139023		5830411N06Rik	0.419137	0.009768	0.0348955
Noc4l	2.75729	0.00675299	0.0278429		Ifitm2	0.228715	0.0412983	0.0878406
Gm15559	Inf	0.0454731	0.0878406		Hras	0.397286	0.0363419	0.0806012
Myo1h	Inf	0.0253105	0.0623042		Irf7	0.48658	0.0315175	0.0728577
Cit	Inf	0.000408852	0.00345529		Tmem80	0.479313	0.0242797	0.0623042
Plbd2	2.90553	0.00362606	0.0177512		Rplp2	0.47128	6.57921e-30	9.28399e-27
Acad10	Inf	5.53913e-05	0.00071382		Polr2l	0.499459	0.000458878	0.00377418
Brap	2.02032	0.0252552	0.0623042		Cd81	0.177889	0.0441611	0.0878406
Rad9b	Inf	0.00811891	0.030169		Kcnq1ot1	0.492802	0.00952759	0.0342972
4932422M17Rik	Inf	0.000306079	0.00267438		Ppfia1	0.316866	0.0133227	0.0435595
Ubc	2.11491	5.65816e-11	2.72967e-09		Oraov1	0.444724	0.0434695	0.0878406
Aacs	Inf	5.94746e-10	2.41512e-08		Syne1	0.266834	0.00208434	0.0120051
Adgrd1	Inf	0.00465176	0.0206582		Ipcef1	0.403672	0.030079	0.0707414
Nipsnap2	2.11244	0.0413924	0.0878406		Tab2	0.297263	9.96264e-05	0.00112243
Galnt17	Inf	0.0142692	0.0435595		Phactr2	0.42397	0.00266401	0.0139023
Gatsl2	Inf	0.00155047	0.00948161		Heca	0.315754	0.00166598	0.0100645
Gtf2ird2	Inf	9.01539e-07	2.08553e-05		Tnfaip3	0.243428	0.017049	0.0498354
4933404O12Rik	Inf	0.000306079	0.00267438		Map3k5	0.256951	0.0253023	0.0623042
Ufsp1	Inf	0.0454731	0.0878406		L3mbtl3	0.232245	0.00417553	0.0196732
9130604C24Rik	Inf	0.00811891	0.030169		Ncoa7	0.333543	0.00546555	0.0235856
Nyap1	Inf	0.0253105	0.0623042		Cd164	0.440856	1.72308e-06	3.58887e-05
Zcwpw1	4.1804	0.00711561	0.0288118		Sesn1	0.368047	0.000575827	0.00444019
Pilra	Inf	0.0454731	0.0878406		Foxo3	0.351098	0.012115	0.0410212
Gm10874	Inf	0.00465176	0.0206582		Nus1	0.336013	0.00951331	0.0342676
A430033K04Rik	Inf	0.00465176	0.0206582		Dnajc12	0.165183	0.0269364	0.0652256
3110082I17Rik	Inf	0.0142692	0.0435595		Reep3	0.471794	0.0307963	0.071828
Mafk	4.1804	0.00680136	0.027947		Ado	0.450283	0.04657	0.0893846
Snx8	Inf	0.000900271	0.00632818		Abca7	0.373568	0.046978	0.0898473
Gm43703	Inf	0.0253105	0.0623042		Rexo1	0.450858	0.00661704	0.0273981
Amz1	Inf	0.0253105	0.0623042		Ap3d1	0.430492	0.0165878	0.0489297
Zfp316	Inf	0.0142692	0.0435595		Gadd45b	0.307886	0.0249323	0.0623042
D130017N08Rik	Inf	0.0454731	0.0878406		Fzr1	0.444724	0.0297668	0.0701825
Flt3	Inf	0.0454731	0.0878406		Gm17745	0.249045	0.0295187	0.0697433
Foxp2	Inf	0.00811891	0.030169		Cep83	0.260905	0.0036518	0.0178308
Tbxas1	Inf	0.0454731	0.0878406		Nudt4	0.462513	0.0319702	0.0735947
Adck2	2.71281	0.030226	0.070841		Dusp6	0.34392	0.0226685	0.0610469
Trbv13-2	Inf	0.0253105	0.0623042		Zdhhc17	0.250662	0.0122519	0.0414102
Trbv19	Inf	0.0253105	0.0623042		Phlda1	0.219746	0.00991167	0.0352971
Ephb6	Inf	0.000524282	0.00411011		Rab21	0.37865	0.000477446	0.00391134
Zfp777	Inf	0.000524282	0.00411011		Usp15	0.394322	0.00110931	0.00754392
Repin1	Inf	0.000524282	0.00411011		Cnpy2	0.421664	0.00488477	0.0214734
Gm7932	Inf	0.0454731	0.0878406		Pym1	0.440681	0.0173068	0.0504322
Fkbp14	Inf	0.00465176	0.0206582		Arhgef18	0.259422	0.00957621	0.0344085
Nod1	3.3799	0.0373616	0.0820148		Ing1	0.480857	0.0129765	0.0433404
Pde1c	Inf	0.0454731	0.0878406		Mrps31	0.336719	0.0120203	0.0407984
Vmn1r15	Inf	0.0454731	0.0878406		Gpat4	0.474372	0.0406501	0.0874085
Lancl2	Inf	0.00811891	0.030169		Tacc1	0.499459	0.000888715	0.00632818
St3gal5	Inf	0.0253105	0.0623042		Bag4	0.403216	0.0380756	0.0833975
Tmem150a	Inf	0.0142692	0.0435595		Hgsnat	0.422487	0.00797863	0.030169
Gm9008	Inf	0.00155047	0.00948161		Clcn3	0.396545	0.0033179	0.0165439
Gcfc2	Inf	4.36912e-06	7.98098e-05		Upf1	0.425998	0.0152769	0.0459401
Dqx1	Inf	0.0253105	0.0623042		Jund	0.499459	8.14129e-05	0.000951409
Lbx2	Inf	0.000900271	0.00632818		Use1	0.49509	1.39689e-05	0.000222104
Gm15624	Inf	0.00811891	0.030169		Bst2	0.376305	1.97155e-05	0.000304051
Smyd5	3.73568	0.0181052	0.0521663		Dcaf15	0.435829	0.0187106	0.0532187
Alms1	Inf	0.00155047	0.00948161		Trmt1	0.455188	0.0403897	0.0871153
Nat8f4	Inf	0.0454731	0.0878406		Junb	0.239099	0.0187872	0.0532346
Gm44264	Inf	0.0454731	0.0878406		N4bp1	0.300188	0.0111551	0.0386284
Gm32592	Inf	7.40353e-06	0.000128581		Cyld	0.464938	0.00118481	0.00796145
Lhfpl4	Inf	0.00811891	0.030169		Cnot1	0.416261	0.00363051	0.0177544
Creld1	Inf	3.27328e-05	0.00046922		Slc38a7	0.192714	0.0482221	0.0914914
Gm26982	Inf	0.00465176	0.0206582		Ctcf	0.494367	0.00509161	0.0222305
Pparg	Inf	0.000306079	0.00267438		Gm10073	0.0758995	3.95647e-13	2.50922e-11
Cand2	Inf	0.000306079	0.00267438		Nfat5	0.352221	0.00271736	0.0140329
Ift122	Inf	0.0454731	0.0878406		Ap1g1	0.274246	0.0111938	0.0387386
Rassf4	Inf	0.00267976	0.0139023		Rfwd3	0.284623	0.0382647	0.083562
Cacna2d4	Inf	0.00811891	0.030169		Maf	0.38835	3.08043e-10	1.30732e-08
Usp18	Inf	0.00465176	0.0206582		Cmip	0.331521	0.0406251	0.0874085
Klrg1	Inf	0.000779187	0.00577175		Banp	0.27107	0.00104852	0.0072351
Clec4a1	Inf	0.0253105	0.0623042		Zfpm1	0.241421	0.0448359	0.0878406
Clec4a3	Inf	0.00811891	0.030169		Snai3	0.403672	0.0440613	0.0878406
Cd27	2.04573	0.0318707	0.0734696		Irf2bp2	0.303894	0.00112988	0.00766534
Gm10069	Inf	0.00811891	0.030169		Nrp1	0.385427	0.0425149	0.0878406
Clec12a	Inf	0.000458182	0.00377418		Pxk	0.439782	0.0370205	0.0815887
Klra17	Inf	0.0454731	0.0878406		Ppp3cb	0.393409	0.00127921	0.00847465
Klra4	Inf	0.0253105	0.0623042		Dennd6a	0.326131	0.0428675	0.0878406
Styk1	Inf	0.0253105	0.0623042		Il17rb	0.455188	0.0404653	0.0871772
Gpr19	Inf	0.0253105	0.0623042		Parg	0.391357	0.0344546	0.0773267
Plbd1	Inf	1.28849e-08	4.43463e-07		Ero1l	0.442182	0.00092666	0.00650557
Erp27	Inf	0.0454731	0.0878406		Tmem260	0.429899	0.0134967	0.0435595
Eps8	3.33543	0.00443189	0.0206582		Psme2	0.474372	8.50023e-08	2.48596e-06
Ldhb	Inf	4.32252e-05	0.000578157		Zmym2	0.250157	0.00224338	0.0127008
Stk38l	Inf	0.00811891	0.030169		Lats2	0.407663	0.0388312	0.0844627
Dennd5b	Inf	0.00811891	0.030169		Mrpl57	0.479718	0.000181187	0.00178171
Bicd1	Inf	3.6214e-05	0.00049255		Gm26916	0.336013	0.046066	0.0887733
Tmc4	Inf	0.0253105	0.0623042		Blk	0.298043	0.000135411	0.00142067
Pirb	Inf	0.0253105	0.0623042		Extl3	0.306365	0.0370284	0.0815887
Lair1	Inf	0.0454731	0.0878406		Zfp395	0.397911	0.00720353	0.0290221
Zfp784	Inf	0.0142692	0.0435595		Dpysl2	0.450462	0.00564937	0.0241807
Zfp667	Inf	0.000458182	0.00377418		Rcbtb2	0.498726	0.015616	0.0466862
Zfp583	Inf	0.0454731	0.0878406		Rb1	0.410514	0.0320445	0.0737054
Zfp78	Inf	0.00465176	0.0206582		Lpar6	0.46813	1.96101e-05	0.000303255
Zfp418	Inf	0.00465176	0.0206582		Tnfsf11	0.207538	0.00162039	0.00985584
Zfp772	Inf	0.00267976	0.0139023		Rgcc	0.444724	2.1879e-06	4.41052e-05
Gm45351	Inf	0.0454731	0.0878406		Tbc1d4	0.307264	0.0207273	0.0569608
Zfp128	Inf	0.00811891	0.030169		Kctd12	0.255716	8.55327e-05	0.000989518
Zbtb45	3.29095	0.0443983	0.0878406		Fbxl3	0.429899	0.0136622	0.0435595
C5ar1	Inf	0.00465176	0.0206582		Mbnl2	0.448281	0.0135659	0.0435595
Pglyrp1	Inf	6.78018e-06	0.00011997		Birc2	0.369463	0.00129365	0.00856031
Ppm1n	Inf	5.33318e-07	1.33198e-05		Sesn3	0.334144	0.0010461	0.00722724
Gm26852	Inf	4.36912e-06	7.98098e-05		Chordc1	0.489196	0.00264156	0.0139023
Klc3	Inf	0.0454731	0.0878406		Olfr77	0.379185	0.00857252	0.0315843
Ppp1r37	7.11558	2.16966e-06	4.38943e-05		Dnmt1	0.459548	0.0268798	0.0651725
Apoc4	Inf	0.0454731	0.0878406		Ilf3	0.409146	0.00637383	0.0266297
Zfp112	Inf	0.0253105	0.0623042		Tmed1	0.355779	0.0409717	0.0878406
Zfp93	Inf	0.0454731	0.0878406		Smarca4	0.453401	0.000621157	0.00475724
Cd177	Inf	0.0454731	0.0878406		Prkcsh	0.46696	0.00226488	0.0127585
Cd79a	Inf	0.000524282	0.00411011		Zfp809	0.25794	0.0182941	0.0525707
Atp1a3	Inf	0.00811891	0.030169		Zbtb44	0.391357	0.0168794	0.0495113
Zfp526	Inf	0.0454731	0.0878406		Nfrkb	0.486231	0.0440814	0.0878406
Megf8	Inf	0.0253105	0.0623042		Ets1	0.437476	1.48332e-08	4.95415e-07
Rab4b	4.62513	0.00236683	0.0132666		Cdon	0.166771	0.0180239	0.0521375
Shkbp1	2.04573	0.0314242	0.0727829		Cbl	0.43332	0.00256519	0.0139023
Zfp59	Inf	0.00811891	0.030169		Hmbs	0.404698	0.00934728	0.0337971
Zfp850	Inf	0.00811891	0.030169		Ddx6	0.38615	0.000242997	0.00227838
Fbxo17	2.66834	0.0103237	0.0364742		Kmt2a	0.46926	0.00385635	0.0185884
Lgals4	Inf	0.0454731	0.0878406		Cep164	0.449956	0.0208505	0.0572419
1110035H17Rik	Inf	0.0142692	0.0435595		Pcsk7	0.499785	0.0247683	0.0623042
2200002D01Rik	Inf	0.00465176	0.0206582		Rexo2	0.180769	2.63534e-15	2.06597e-13
Zfp790	Inf	0.000179069	0.00176703		Rpl10-ps3	0.387697	2.46634e-11	1.28899e-09
Zfp27	Inf	0.0454731	0.0878406		Dlat	0.463449	0.0232072	0.0620766
Zfp566	Inf	0.00267976	0.0139023		Cul5	0.413331	0.0200979	0.0557453
Wdr62	Inf	0.0454731	0.0878406		Dnaja4	0.444724	0.0410217	0.0878406
Proser3	Inf	0.0142692	0.0435595		Ireb2	0.249045	0.00894302	0.0327144
Hspb6	Inf	0.00811891	0.030169		Hexa	0.473313	0.010913	0.0380291
Gm49396	Inf	0.0454731	0.0878406		Rplp1	0.46998	3.51443e-26	1.80336e-23
Igflr1	Inf	0.00267976	0.0139023		Coro2b	0.292247	0.00146796	0.00948161
Tmem147os	Inf	0.0142692	0.0435595		Dpp8	0.428046	0.0386365	0.0841365
Cd22	Inf	0.0253105	0.0623042		Herc1	0.494533	0.0284777	0.0678976
Lsr	Inf	0.000179069	0.00176703		Rab8b	0.39557	0.00033526	0.00289794
Gm12758	Inf	0.000900271	0.00632818		Lactb	0.397286	0.0466982	0.0894724
Faap24	4.35829	0.00472317	0.0209116		Tcf12	0.359073	0.0012492	0.00832474
Tshz3	Inf	0.00160102	0.00975901		Rfx7	0.290241	0.00605605	0.0255783
2610021A01Rik	Inf	6.16082e-05	0.000754325		Leo1	0.375994	0.00396485	0.0189656
Zfp975	Inf	0.0454731	0.0878406		Gclc	0.379674	3.68965e-05	0.000500625
Vsig10l	Inf	0.0454731	0.0878406		Fbxo9	0.472811	0.0257376	0.0631627
Clec11a	Inf	0.0454731	0.0878406		Phip	0.481028	0.000408921	0.00345529
Fcgrt	Inf	0.00465176	0.0206582		Bcl2a1d	0.32366	0.000228068	0.00215993
Tead2	Inf	0.0454731	0.0878406		Bcl2a1a	0.241421	0.0448359	0.0878406
Sphk2	3.3799	0.0396479	0.0858751		U2surp	0.480302	0.00025058	0.00233012
Gtf2h1	2.60905	0.012249	0.0414102		Slc25a36	0.335564	0.00216397	0.0124004
Tmem86a	Inf	0.0066257	0.0273981		Alas1	0.394692	0.0206059	0.0567637
Mtmr10	Inf	0.00465176	0.0206582		Parp3	0.329095	0.033457	0.0760862
Nr2f2	Inf	0.0454731	0.0878406		Dcaf1	0.279541	0.0062955	0.026361
Mctp2	Inf	0.000306079	0.00267438		Rbm6	0.451566	0.000659582	0.00503105
Ntrk3	Inf	0.0142692	0.0435595		Usp19	0.453618	0.0228906	0.0614966
Fanci	Inf	0.0142692	0.0435595		Scap	0.406604	0.0247435	0.0623042
Ticrr	Inf	0.00811891	0.030169		Ccrl2	0.400251	0.0146915	0.0445357
Zfp710	Inf	3.6214e-05	0.00049255		Lrrfip2	0.381939	0.0142933	0.0436097
Hdgfl3	5.24774	0.000584139	0.00449202		Cmtm7	0.49809	3.28809e-06	6.22801e-05
Sh3gl3	Inf	0.00465176	0.0206582		Tgfbr2	0.463126	0.00347529	0.0171184
Me3	Inf	0.00465176	0.0206582		Azi2	0.440276	0.000989146	0.00688431
Gm45159	Inf	0.0253105	0.0623042		Acaa1a	0.484892	0.00246447	0.013705
Usp35	Inf	0.0454731	0.0878406		Tug1	0.465652	0.0342937	0.0770638
Kctd21	Inf	0.0253105	0.0623042		Mtmr3	0.347693	0.0295559	0.0698019
Pak1	Inf	0.00811891	0.030169		Purb	0.394241	0.000125311	0.00133203
Gm38405	Inf	0.00155047	0.00948161		Cnrip1	0.190596	0.0320632	0.0737185
Lipt2	Inf	0.00267976	0.0139023		Rab1a	0.478933	0.000667089	0.00507459
Gm35082	Inf	0.0142692	0.0435595		Aftph	0.368485	0.0189353	0.0535737
P2ry6	Inf	0.0454731	0.0878406		Peli1	0.476744	0.0321892	0.0739178
Lrrc51	Inf	0.0454731	0.0878406		Usp34	0.366626	7.68296e-05	0.00090724
Trim68	Inf	0.00155047	0.00948161		Pex13	0.381939	0.00941805	0.0339789
Trim6	Inf	0.00465176	0.0206582		Ppp4r3b	0.472926	0.00566199	0.0241929
Trim12a	Inf	0.000104952	0.00113703		Cfap36	0.486019	0.00809815	0.030169
Apbb1	Inf	0.00465176	0.0206582		Sptbn1	0.454986	0.0217204	0.0590835
Olfr715b	Inf	0.00267976	0.0139023		Asb3	0.421005	0.0330562	0.0753874
Mrvi1	Inf	0.0253105	0.0623042		Erlec1	0.39531	0.0131698	0.0435595
4933406I18Rik	Inf	0.0142692	0.0435595		Ccng1	0.48096	0.0143521	0.043718
Plekha7	Inf	0.0142692	0.0435595		Gm12166	0.133417	0.00238545	0.0133577
Itpripl2	Inf	0.0113769	0.0390523		Adam19	0.441944	0.00407116	0.019343
Igsf6	Inf	0.0454731	0.0878406		Trim41	0.364673	0.0438886	0.0878406
Palb2	Inf	4.01584e-06	7.40757e-05		Cnot6	0.404294	0.00392212	0.018809
Cd19	Inf	0.0142692	0.0435595		Hnrnph1	0.430573	8.46234e-05	0.000982823
Tbx6	Inf	0.0454731	0.0878406		Rufy1	0.400251	0.0366672	0.0810995
Qprt	Inf	0.0142692	0.0435595		Gm26551	0.316248	0.0403709	0.0871153
Zfp747	Inf	6.16082e-05	0.000754325		2023-09-08	0.479528	0.0098602	0.0351359
9130019O22Rik	Inf	0.00811891	0.030169		Atox1	0.491187	4.57567e-08	1.38856e-06
Fbxl19	Inf	0.00155047	0.00948161		Elp5	0.435361	0.0168679	0.0495113
Bckdk	2.56161	0.00166038	0.0100645		Dlg4	0.416636	0.0134679	0.0435595
Prss36	Inf	0.0253105	0.0623042		Xaf1	0.373568	0.0294128	0.0695805
Bag3	Inf	0.00811891	0.030169		Ankfy1	0.33206	0.00864217	0.0317994
Tacc2	Inf	0.0454731	0.0878406		Zzef1	0.366897	0.0100443	0.0356794
Btbd16	Inf	0.0454731	0.0878406		Pafah1b1	0.494997	5.76847e-05	0.000738318
Lhpp	Inf	0.00811891	0.030169		Slc43a2	0.355779	0.00222	0.0126063
Pwwp2b	Inf	0.00811891	0.030169		Crk	0.375544	0.0104775	0.0368931
Cyp2e1	Inf	0.0253105	0.0623042		Abr	0.390369	0.0123666	0.0417167
Ifitm10	Inf	3.6214e-05	0.00049255		Ssh2	0.411687	0.000945663	0.0066143
Tnfrsf22	Inf	0.000900271	0.00632818		Nufip2	0.470136	0.0175682	0.0510622
Mrgpre	Inf	0.0253105	0.0623042		Nlk	0.416928	0.025852	0.0634159
Nadsyn1	Inf	6.16082e-05	0.000754325		Suz12	0.364673	0.00351535	0.0172992
Ust	Inf	0.00811891	0.030169		Slfn8	0.484255	0.0347397	0.077812
B230208H11Rik	Inf	0.0142692	0.0435595		Ccl3	0.205257	0.00705616	0.028674
Ltv1	3.3799	0.000339974	0.00292972		Ccl4	0.182125	1.23748e-07	3.46797e-06
Adat2	Inf	5.33318e-07	1.33198e-05		Synrg	0.434841	0.0435843	0.0878406
Txlnb	Inf	0.0454731	0.0878406		Rnft1	0.499079	0.0302011	0.070841
Gm33104	4.53618	0.00294035	0.0149385		Rnf43	0.25794	0.0183842	0.0527509
Raet1e	Inf	0.00811891	0.030169		Mir142hg	0.23021	0.00372444	0.018061
Slc2a12	Inf	0.000956176	0.0066713		Msi2	0.378839	0.012376	0.0417167
Enpp1	Inf	0.00811891	0.030169		Spag9	0.369121	0.00373987	0.0181197
Akap7	Inf	0.000524282	0.00411011		Npepps	0.422487	0.0273135	0.0660255
Gm46218	Inf	0.019593	0.0546132		Mllt6	0.346884	3.84199e-05	0.000517564
Amd2	Inf	0.0066257	0.0273981		Msl1	0.493239	0.0193006	0.0541995
Fig4	Inf	1.52475e-06	3.22899e-05		Igfbp4	0.392584	0.0315087	0.0728577
Ccdc162	Inf	0.0142692	0.0435595		Mlx	0.474372	0.00618694	0.0260222
Cd24a	Inf	0.0142692	0.0435595		Arhgap27os3	0.419311	0.0282139	0.0674225
Lilrb4a	Inf	0.00465176	0.0206582		Kansl1	0.49809	0.00380738	0.0184152
Cep85l	Inf	0.00267976	0.0139023		Itgb3	0.163065	0.00336368	0.0167244
Tbc1d32	Inf	0.00267976	0.0139023		Bptf	0.391735	5.96906e-05	0.000754325
Msl3l2	Inf	6.16082e-05	0.000754325		Helz	0.48549	0.0162179	0.0480992
Ccdc138	Inf	0.00267976	0.0139023		Prkca	0.478078	0.0462758	0.0891168
Adamts14	Inf	0.0454731	0.0878406		Fam20a	0.275729	0.0215291	0.0587052
Npffr1	Inf	0.0454731	0.0878406		1700012B07Rik	0.244598	0.0323534	0.0740588
Dna2	Inf	0.0142692	0.0435595		Ten1	0.370202	0.000161991	0.00165344
Pbld1	Inf	0.00465176	0.0206582		Timp2	0.371248	0.00423875	0.0199046
Gstt3	Inf	0.0454731	0.0878406		Mafg	0.46696	0.00793579	0.030169
Gm16222	Inf	0.0454731	0.0878406		Larp4b	0.453331	0.00189383	0.011051
Pcbp3	Inf	9.01539e-07	2.08553e-05		Actn2	0.405504	2.63142e-11	1.32615e-09
Syde1	Inf	9.38061e-05	0.00106333		Zscan26	0.422487	0.00398585	0.0190338
Gzmm	Inf	0.0454731	0.0878406		BC005537	0.426935	0.00168006	0.0101206
Tjp3	5.87035	0.000126031	0.00133717		Cd83	0.280518	0.0232926	0.0621949
Tbxa2r	4.00251	0.0105901	0.0371275		Jarid2	0.313923	0.0182099	0.0524413
BC024063	Inf	0.00465176	0.0206582		Atxn1	0.364117	0.000541547	0.00421037
Ric8b	Inf	0.00026976	0.00248392		Nup153	0.374504	0.00810738	0.030169
Prdm4	Inf	3.88575e-08	1.18556e-06		Cks2	0.266834	0.0144934	0.0440963
Tmtc3	Inf	0.000900271	0.00632818		Nfil3	0.163065	0.0406476	0.0874085
Mettl25	Inf	0.000900271	0.00632818		Pdlim7	0.307264	0.0337896	0.0765428
Rab3ip	Inf	0.0454731	0.0878406		Fam193b	0.415075	0.0413728	0.0878406
Mdm1	Inf	0.00267976	0.0139023		B230219D22Rik	0.486855	0.00290235	0.0148121
Ifng	Inf	0.00267976	0.0139023		Hnrnpa0	0.473682	0.00139987	0.0091078
Lrig3	Inf	0.0454731	0.0878406		Gkap1	0.155653	0.0165151	0.0488054
Shmt2	2.37927	0.0353415	0.0787537		Zcchc6	0.459203	0.000461634	0.00378731
Lrp1	Inf	0.0454731	0.0878406		Ccnh	0.400251	0.00591708	0.0251496
Gm29585	Inf	0.0454731	0.0878406		Xrcc4	0.349426	0.0401698	0.0868389
Erbb3	Inf	0.000524282	0.00411011		Zfyve16	0.244598	0.0225673	0.0609182
Olfr765	Inf	0.0142692	0.0435595		Papd4	0.494137	0.0287386	0.0683417
Prr36	Inf	0.0253105	0.0623042		Gm10260	0.240477	3.52131e-37	1.98759e-33
Map2k7	2.04573	0.0314242	0.0727829		Gm10320	0.418281	5.2839e-06	9.40841e-05
Ctxn1	Inf	0.00811891	0.030169		Fcho2	0.385427	0.00787227	0.030169
5830468F06Rik	Inf	2.30326e-08	7.42894e-07		Tnpo1	0.327984	0.00625865	0.0262651
Angpt2	Inf	0.00811891	0.030169		Pik3r1	0.496748	0.00086361	0.00632243
Thsd1	Inf	0.0142692	0.0435595		Erbin	0.474372	0.0229525	0.0616044
Gm17484	Inf	0.0142692	0.0435595		Trappc13	0.458768	0.0365994	0.081013
Star	Inf	0.00465176	0.0206582		Kif2a	0.402867	0.0180636	0.0521557
Purg	Inf	0.0454731	0.0878406		Gzma	0.246308	0.00594413	0.0252265
Prag1	Inf	0.0454731	0.0878406		Paip1	0.363513	0.00381217	0.0184226
Mtmr7	Inf	0.0253105	0.0623042		Asxl2	0.498426	0.000370115	0.00316051
1700029J07Rik	Inf	0.00267976	0.0139023		Pum2	0.419902	0.000121338	0.0013002
Wwc2	Inf	5.53913e-05	0.00071382		Smc6	0.477397	0.000280822	0.00257737
4930555F03Rik	Inf	0.0454731	0.0878406		Rps7	0.486307	3.07167e-21	4.4456e-19
Msmo1	2.75729	0.0269109	0.0651918		Cog5	0.303458	0.00340404	0.0168839
Lzts1	Inf	0.000900271	0.00632818		Ahr	0.465652	0.00750896	0.0300595
Zfp963	Inf	0.0142692	0.0435595		Zfp277	0.474372	0.0392677	0.0851496
Pbx4	Inf	0.0253105	0.0623042		Nfkbia	0.44232	5.23091e-05	0.000682372
Yjefn3	Inf	0.0454731	0.0878406		Ralgapa1	0.415075	0.0421883	0.0878406
Mef2b	Inf	0.0454731	0.0878406		Klhl28	0.28736	0.0158102	0.0471172
Zfp882	Inf	2.13123e-05	0.000319834		Timm9	0.376305	0.00414497	0.0195534
Zfp961	Inf	2.8484e-09	1.05774e-07		Hif1a	0.319155	0.00688057	0.0282447
Cyp4f18	Inf	0.0142692	0.0435595		Atp6v1d	0.498504	0.00188054	0.011011
Gm10282	Inf	0.000306079	0.00267438		Zfyve26	0.444724	0.0242667	0.0623042
1700030K09Rik	Inf	0.00132698	0.0087195		Zfp36l1	0.377753	9.11148e-05	0.00105172
Gm17435	Inf	0.0142692	0.0435595		Synj2bp	0.498726	0.018675	0.0531569
Med26	Inf	1.25555e-05	0.000202483		Pcnx	0.256951	0.0433544	0.0878406
F2rl3	Inf	0.0454731	0.0878406		Elmsan1	0.300188	0.0479641	0.0911245
Large1	3.73568	3.65358e-08	1.12691e-06		Acyp1	0.494137	0.0146546	0.0444477
Hmox1	Inf	0.00155047	0.00948161		Fos	0.0889447	0.028068	0.0671875
Il15	Inf	6.16082e-05	0.000754325		Ccdc88c	0.463783	0.00108327	0.0074025
Cc2d1a	4.26935	0.00553978	0.0238149		Ppp4r3a	0.468442	0.00714102	0.0288733
Lyl1	Inf	0.0142692	0.0435595		Lgmn	0.244598	0.0323534	0.0740588
Mast1	Inf	0.00811891	0.030169		Btbd7	0.28907	0.0129296	0.0433111
Gnao1	Inf	0.0454731	0.0878406		Ifi27l2a	0.235068	0.00697607	0.0284304
9330175E14Rik	Inf	1.10678e-07	3.12357e-06		Dicer1	0.355779	0.00823736	0.0305137
Dok4	Inf	0.00465176	0.0206582		Gm28875	0.146497	0.00130195	0.00859508
Ccdc102a	Inf	1.02515e-14	7.41847e-13		Glrx5	0.488387	0.000706524	0.00532434
Mmp15	Inf	0.00155047	0.00948161		Yy1	0.481348	0.0012381	0.00828007
Cfap20	2.38372	0.00499363	0.0218642		Dync1h1	0.472519	0.0440735	0.0878406
Gm31805	Inf	0.00267976	0.0139023		Hsp90aa1	0.488901	1.02896e-05	0.000174938
Cmtm4	Inf	0.0454731	0.0878406		Rcor1	0.393898	0.00647944	0.0269711
B3gnt9	4.09146	0.00832474	0.0307516		Ckb	0.43161	6.12696e-08	1.83954e-06
Hsf4	Inf	0.0142692	0.0435595		Crip1	0.489089	0.000139327	0.00145365
Slc9a5	Inf	0.0142692	0.0435595		Ttc33	0.468442	0.037081	0.0816628
Zdhhc1	Inf	0.00811891	0.030169		Ptger4	0.392839	0.0342599	0.0770431
Enkd1	Inf	0.00267976	0.0139023		2410089E03Rik	0.320201	0.0308851	0.071918
Cenpt	3.73568	0.0181052	0.0521663		Nipbl	0.461195	0.000443824	0.00370036
Slc12a4	Inf	1.25555e-05	0.000202483		Lmbrd2	0.216009	0.0379985	0.0832933
Zfp90	Inf	0.0142692	0.0435595		Il7r	0.473992	1.21292e-10	5.52118e-09
Cdh1	Inf	0.0253105	0.0623042		Dnajc21	0.397911	0.0152014	0.0457374
Hp	Inf	0.0253105	0.0623042		Retreg1	0.410514	0.00172517	0.0102718
Zfp821	Inf	0.000900271	0.00632818		Trio	0.348937	0.0177539	0.0514474
Tmem231	Inf	0.0454731	0.0878406		Oxr1	0.454086	0.0148905	0.0449698
Adat1	Inf	1.86872e-07	4.92893e-06		Taf2	0.320201	0.0491133	0.0928079
Plcg2	Inf	0.0142692	0.0435595		Sntb1	0.424198	0.00335105	0.0166797
Tldc1	Inf	0.00811891	0.030169		Fam83a	0.489196	0.016972	0.0496876
Crispld2	Inf	0.000306079	0.00267438		Mtss1	0.493239	0.00487774	0.0214592
6430548M08Rik	Inf	0.0253105	0.0623042		Scrib	0.277952	0.0409808	0.0878406
Gins2	Inf	0.000158999	0.00163472		Plec	0.404698	0.0131418	0.0435595
1190005I06Rik	Inf	0.0454731	0.0878406		Cyhr1	0.484749	0.0318963	0.0734696
Gm45833	Inf	0.0253105	0.0623042		Micall1	0.316248	0.0400286	0.0866075
Cbfa2t3	Inf	0.00811891	0.030169		Ddx17	0.344249	2.72885e-06	5.23907e-05
Gm45894	Inf	0.00811891	0.030169		AC147041.1	0.241421	0.0455445	0.0879485
Gm29773	Inf	0.0142692	0.0435595		Ep300	0.425998	0.0206376	0.0568232
Urb2	Inf	0.00465176	0.0206582		Cerk	0.470666	0.0134102	0.0435595
Arv1	Inf	6.16082e-05	0.000754325		Arid2	0.279541	0.0163677	0.0484461
Disc1	Inf	0.0454731	0.0878406		Hdac7	0.366897	0.010118	0.0358959
Pard3	2.66834	0.0339187	0.076572		Kmt2d	0.284623	3.2407e-06	6.15891e-05
Gm26772	Inf	0.0253105	0.0623042		Bcdin3d	0.419311	0.0280374	0.0671428
Tmem254a	Inf	0.0454731	0.0878406		Larp4	0.415075	0.0413728	0.0878406
Sfmbt1	Inf	1.41051e-06	3.06213e-05		Nr4a1	0.168995	0.0155875	0.0466313
Nt5dc2	Inf	0.0454731	0.0878406		Myg1	0.437608	0.00345697	0.0170714
Phf7	Inf	9.38061e-05	0.00106333		Sp1	0.283006	0.0278666	0.0668473
Wdfy4	Inf	0.019593	0.0546132		Smug1	0.166771	0.0346851	0.0777205
Gm49032	Inf	0.000900271	0.00632818		Nlrc3	0.483266	0.00710046	0.0288118
A530076I17Rik	Inf	0.0142692	0.0435595		Dnm1l	0.436253	0.0113841	0.0390523
Cdkn3	Inf	0.0454731	0.0878406		Klhl24	0.378015	0.00049691	0.0040473
Olfr729	Inf	0.0142692	0.0435595		Ccdc50	0.387545	0.00518122	0.0225657
Klhl33	Inf	0.0454731	0.0878406		Atp13a3	0.308691	0.00927431	0.0336645
Arhgef40	Inf	0.0253105	0.0623042		Pak2	0.475607	5.7954e-05	0.000740086
Trav7d-3	Inf	0.00267976	0.0139023		Lrch3	0.371951	0.036533	0.0809062
Trav15-1-dv6-1	Inf	0.0454731	0.0878406		Iqcg	0	0.00068012	0.00515981
Mmp14	Inf	0.000306079	0.00267438		Parp14	0.474372	0.0228313	0.0613959
Gm10366	Inf	0.0253105	0.0623042		Dtx3l	0.313424	0.00314588	0.0157978
4931414P19Rik	Inf	0.0142692	0.0435595		Iqcb1	0.387545	0.0305372	0.071432
Cdh24	Inf	0.0142692	0.0435595		Lrrc58	0.381192	0.000240439	0.00226191
Tm9sf1	Inf	9.01539e-07	2.08553e-05		Plcxd2	0.240151	0.0279229	0.0669253
Nop9	2.17915	0.0308083	0.071828		Retnlg	0.106734	0.0458461	0.0884704
Defb42	Inf	0.0454731	0.0878406		Pcnp	0.490068	0.00126257	0.00838415
Prss55	Inf	0.00267976	0.0139023		Cldnd1	0.449405	0.0263885	0.0643963
Cdca2	Inf	0.0253105	0.0623042		Sod1	0.486725	0.00329894	0.0164785
Nefl	Inf	2.85001e-20	3.57482e-18		Ifnar1	0.390583	0.00383931	0.018522
Tnfrsf10b	Inf	0.00267976	0.0139023		Ttc3	0.398604	0.00248502	0.0138057
9930012K11Rik	Inf	2.58023e-06	4.98766e-05		Dyrk1a	0.266834	0.00246369	0.013705
Ppp3cc	2.68613	0.000729013	0.0054865		Tmem181a	0.320201	0.00754974	0.0301586
Polr3d	2.17915	0.0319029	0.0734696		Dynlt1a	0.385427	0.0474707	0.0904134
Gm4285	Inf	0.000306079	0.00267438		Dynlt1c	0.293518	0.0250127	0.0623042
Tpm3-rs7	3.01856	1.48301e-12	8.62965e-11		Dynlt1f	0.389133	0.0194088	0.0544493
Dzip1	Inf	0.00465176	0.0206582		Tagap1	0.339607	0.027569	0.0664529
A330035P11Rik	Inf	0.0454731	0.0878406		Ccr6	0.116015	0.000937533	0.00656557
Gm10717	Inf	0.0253105	0.0623042		Agpat4	0.483637	0.0362097	0.0803454
Mmp12	Inf	0.0142692	0.0435595		Igf2r	0.243116	0.000413654	0.00349006
Gm16302	Inf	0.0142692	0.0435595		1600012H06Rik	0.432864	0.0260192	0.0637155
Gm26733	Inf	2.5958e-11	1.31999e-09		Lnpep	0.37501	0.000182451	0.00179102
Zfp846	Inf	3.52884e-10	1.48645e-08		Pgp	0.462513	0.0318651	0.0734696
Gm36198	Inf	0.0454731	0.0878406		Gfer	0.486231	0.0441931	0.0878406
Carm1	Inf	2.13123e-05	0.000319834		Cramp1l	0.277508	0.000529898	0.00414838
Swsap1	Inf	3.6214e-05	0.00049255		Haghl	0.439782	0.0367713	0.0812661
Gm16845	Inf	0.00811891	0.030169		Mettl26	0.463126	0.00342354	0.0169657
Zfp599	Inf	0.000179069	0.00176703		Dusp1	0.259719	0.00249101	0.0138117
Zfp810	Inf	3.6214e-05	0.00049255		Crebrf	0.383867	0.0129447	0.0433111
St14	Inf	0.00155047	0.00948161		Rrp1b	0.394692	0.0208841	0.0572786
Tirap	Inf	0.00465176	0.0206582		Adamts10	0.422487	0.0189024	0.0535268
Hyls1	Inf	0.0142692	0.0435595		H2-Oa	0.259422	0.0460216	0.0887483
Ccdc15	Inf	0.00155047	0.00948161		H2-Eb1	0.363865	0.00110153	0.00750908
Olfr905	Inf	0.0142692	0.0435595		Ehmt2	0.46867	0.0116535	0.0397739
Olfr916	Inf	0.00811891	0.030169		Hspa1b	0.306365	0.00579679	0.0246941
Clmp	Inf	0.00811891	0.030169		Hspa1a	0.28745	0.00221914	0.0126063
Gm30373	Inf	0.00155047	0.00948161		Prrc2a	0.389988	0.00270677	0.0140039
Gm26737	Inf	1.74656e-07	4.7625e-06		Tnf	0.226962	0.00708987	0.0287902
Gm10687	Inf	0.00267976	0.0139023		H2-Q6	0.344932	0.000229135	0.0021664
Gm48719	Inf	0.0142692	0.0435595		H2-Q7	0.292113	2.01635e-08	6.65565e-07
Cryab	Inf	0.0454731	0.0878406		H2-T23	0.436592	2.80612e-10	1.21838e-08
Kdelc2	Inf	0.000524282	0.00411011		Trim39	0.362621	0.0310046	0.0721071
Gm16124	Inf	3.27328e-05	0.00046922		Gm42418	0.372026	1.90638e-14	1.34506e-12
Man2c1os	Inf	0.00811891	0.030169		Runx2	0.163065	0.0403903	0.0871153
Lrrc49	Inf	0.0253105	0.0623042		Nfkbie	0.355779	0.0137365	0.0435595
Kif23	Inf	0.0253105	0.0623042		Polr1c	0.426935	0.00801854	0.030169
Glce	Inf	0.000900271	0.00632818		Bicral	0.237186	0.0215993	0.0588399
Igdcc4	Inf	0.000900271	0.00632818		Ubr2	0.41238	0.00933673	0.0337856
Dapk2	Inf	0.0253105	0.0623042		Ptprs	0.192714	0.0482221	0.0914914
Car12	Inf	0.0142692	0.0435595		Fbxl17	0.355779	0.0409717	0.0878406
Aph1b	Inf	0.00811891	0.030169		Birc6	0.416423	3.13941e-06	5.98657e-05
Aqp9	Inf	1.41051e-06	3.06213e-05		Ttc7	0.494997	0.0167784	0.0493768
Myo5a	Inf	0.000524282	0.00411011		Gm47283	0.230741	1.46165e-08	4.91082e-07
Sh3bgrl2	Inf	2.58023e-06	4.98766e-05		Epc1	0.397911	0.0107743	0.0376563
Tpbg	Inf	0.0454731	0.0878406		Mib1	0.324013	0.0103757	0.0366032
Ube2cbp	Inf	0.0142692	0.0435595		Gm10036	0.464489	0.00699496	0.0284662
Rwdd2a	Inf	0.0454731	0.0878406		Gm10269	0.46418	0.00355276	0.0174529
9430037G07Rik	Inf	0.0253105	0.0623042		Trappc8	0.400251	0.0341092	0.0767652
Trim43b	Inf	0.00155047	0.00948161		Zfp397	0.411369	0.00600136	0.0253931
Ctsh	Inf	8.36374e-07	2.02612e-05		Gm5239	0.444724	0.0370289	0.0815887
Gk5	Inf	0.0142692	0.0435595		Psd2	0.2866	0.0320248	0.0736902
Rbp1	Inf	0.00811891	0.030169		Pfdn1	0.491537	3.51617e-05	0.00049255
Pik3cb	Inf	0.000900271	0.00632818		Hbegf	0.202794	0.00111169	0.00755098
Cep70	Inf	9.01539e-07	2.08553e-05		Zmat2	0.481254	0.00150324	0.00948161
Nphp3	Inf	0.0253105	0.0623042		Nr3c1	0.491622	0.000212086	0.00203589
Acad11	Inf	0.000104952	0.00113703		Tcerg1	0.440856	0.0143912	0.0438137
Cpne4	Inf	1.41051e-06	3.06213e-05		Ythdc2	0.227303	0.0355443	0.0791431
Aste1	Inf	0.000104952	0.00113703		Gm4950	0.192714	0.0482221	0.0914914
Poc1a	Inf	0.00465176	0.0206582		Lmnb1	0.383382	0.00166853	0.0100645
Abhd14a	2.66834	0.035045	0.0782474		Dctn4	0.371951	0.00550143	0.0237042
6430571L13Rik	Inf	0.0253105	0.0623042		Slc26a2	0.266834	0.0197603	0.055025
Cacna2d2	Inf	0.0142692	0.0435595		Gm17669	0.207538	0.0169274	0.0495826
Gm34106	Inf	0.0454731	0.0878406		Rnmt	0.491812	0.0444669	0.0878406
Gm9917	Inf	0.0253105	0.0623042		Mbd2	0.444724	0.00405425	0.0192951
Hyal2	Inf	1.25555e-05	0.000202483		Mex3c	0.205257	0.00372382	0.018061
Hyal3	Inf	0.0454731	0.0878406		Smad4	0.422487	0.0440532	0.0878406
Bsn	Inf	0.0253105	0.0623042		Smad7	0.333543	0.00127664	0.00846759
Klhdc8b	Inf	0.0253105	0.0623042		Adnp2	0.254128	0.0486236	0.0921095
Ccdc71	3.20201	0.00638128	0.0266411		Nfatc1	0.489196	0.0466238	0.0894209
Nradd	Inf	0.00155047	0.00948161		Atp9b	0.311307	0.0160872	0.0478163
Plcd1	Inf	0.000179069	0.00176703		Tshz1	0.410514	0.0465733	0.0893846
Gorasp1	Inf	0.00465176	0.0206582		Tmx3	0.365309	0.000436082	0.00364657
D830035M03Rik	Inf	0.0454731	0.0878406		Gstp1	0.170867	3.08631e-14	2.09886e-12
Vipr1	Inf	0.00811891	0.030169		Neat1	0.299253	4.83038e-10	1.99013e-08
Zkscan7	Inf	0.000524282	0.00411011		Ehd1	0.478078	0.0465643	0.0893846
Xcr1	Inf	0.00811891	0.030169		Slc3a2	0.453618	0.000657182	0.00501953
Patz1	Inf	1.18613e-10	5.4431e-09		Ttc9c	0.472519	0.0322605	0.0740514
Slc35e4	Inf	0.000179069	0.00176703		Ahnak	0.420531	5.78166e-09	2.05247e-07
Mtfp1	Inf	0.0338612	0.0765428		Cd5	0.424958	0.0184778	0.0528575
Ccdc157	Inf	0.0142692	0.0435595		Ms4a4b	0.401686	0.00676691	0.0278799
Camk2b	Inf	0.000779187	0.00577175		Mrpl16	0.426935	0.0349966	0.0782474
Gm11973	Inf	0.0454731	0.0878406		Zfp91	0.412111	0.00293771	0.0149385
Tmem17	Inf	0.0454731	0.0878406		Vps13a	0.475512	0.0194653	0.0545536
Fam161a	Inf	0.0253105	0.0623042		1110059E24Rik	0.362132	0.0240767	0.0623042
0610010F05Rik	Inf	5.53913e-05	0.00071382		Abhd17b	0.43068	0.0219276	0.0594757
Bcl11a	Inf	0.0454731	0.0878406		Smarca2	0.451312	0.012085	0.0409688
4931440F15Rik	Inf	0.0253105	0.0623042		Sgms1	0.46943	0.0297523	0.0701778
Nsg2	Inf	0.0253105	0.0623042		Pcgf5	0.426935	0.0037077	0.0180258
Gm12184	Inf	0.00811891	0.030169		Pdlim1	0.219397	0.00210849	0.0121071
Trim7	Inf	0.0454731	0.0878406		Zfp518a	0.315349	0.0360611	0.0801086
9930111J21Rik1	Inf	0.0253105	0.0623042		Cutc	0.31766	0.0313881	0.0727592
Flt4	Inf	0.0454731	0.0878406		Hif1an	0.342095	0.0167085	0.0492225
D930048N14Rik	Inf	0.0454731	0.0878406		Fbxw4	0.266834	0.0107136	0.0375139
Gm12207	Inf	0.0142692	0.0435595		Gbf1	0.372456	0.0164507	0.0486405
Fstl4	Inf	0.0142692	0.0435595		Nfkb2	0.355779	0.0198813	0.0552529
Pdlim4	Inf	0.00155047	0.00948161		Slk	0.393229	0.0190121	0.0537369
Slc36a3os	Inf	0.0253105	0.0623042		Rpl13a-ps1	0.481462	2.11168e-08	6.92979e-07
Nlrp3	Inf	0.0253105	0.0623042		Dusp5	0.29185	0.00561987	0.0241225
Llgl1	3.3799	0.0373616	0.0820148		Pdcd4	0.447844	6.25816e-07	1.54929e-05
Top3a	Inf	6.16082e-05	0.000754325		Vti1a	0.456583	0.0330168	0.075328
Map2k3os	Inf	0.00811891	0.030169		Rps12-ps3	0.324387	4.59037e-09	1.65032e-07
B9d1	Inf	0.00267976	0.0139023		mt-Nd4l	0.478933	0.0167769	0.0493768
Gm12280	Inf	0.0454731	0.0878406
Gas7	Inf	0.00267976	0.0139023
Tmem107	Inf	6.16082e-05	0.000754325
Nlgn2	Inf	0.0454731	0.0878406
Gm21988	Inf	0.0253105	0.0623042
Nlrp1a	Inf	0.00465176	0.0206582
Ovca2	Inf	0.00465176	0.0206582
Tmigd1	Inf	0.0253105	0.0623042
Ankrd13b	Inf	0.0142692	0.0435595
Gm10392	Inf	0.00811891	0.030169
Aldoc	Inf	0.0454731	0.0878406
Ksr1	Inf	0.000779187	0.00577175
Gm11205	Inf	0.000779187	0.00577175
Atad5	Inf	0.000104952	0.00113703
Tefm	Inf	3.6214e-05	0.00049255
Cdk5r1	Inf	0.0454731	0.0878406
Lig3	3.46884	0.0313313	0.0726922
Pex12	Inf	1.41051e-06	3.06213e-05
Brip1	Inf	0.019593	0.0546132
Tubd1	Inf	0.000900271	0.00632818
Gdpd1	Inf	0.0454731	0.0878406
Smg8	Inf	6.16082e-05	0.000754325
Tspoap1	Inf	0.0253105	0.0623042
Mks1	Inf	1.25555e-05	0.000202483
C030037D09Rik	Inf	0.0142692	0.0435595
Stxbp4	Inf	6.16082e-05	0.000754325
Nme2	2.77952	0.00146897	0.00948161
Gm26830	Inf	0.000900271	0.00632818
Hoxb4	Inf	1.03666e-07	2.97022e-06
2010300F17Rik	Inf	0.0454731	0.0878406
Socs7	Inf	0.000121395	0.0013002
Epop	Inf	1.25555e-05	0.000202483
Tubg2	Inf	0.00155047	0.00948161
Plekhh3	Inf	0.00155047	0.00948161
Ezh1	2.3348	0.0151337	0.0456309
Cntd1	Inf	0.00811891	0.030169
Aoc2	Inf	0.0253105	0.0623042
Ptges3l	Inf	0.0253105	0.0623042
Nbr1	3.02412	0.0118669	0.0403751
Map3k14	2.29033	0.0186485	0.053135
Arhgap27os2	Inf	0.0454731	0.0878406
Gm11707	Inf	0.0253105	0.0623042
Kpna2	Inf	0.00155047	0.00948161
Abca5	Inf	0.000900271	0.00632818
Slc39a11	3.64673	0.0225842	0.0609199
Cd300c2	Inf	3.6214e-05	0.00049255
Unc13d	2.16432	0.00870095	0.031974
Fbf1	Inf	0.00267976	0.0139023
Rnf157	2.63869	0.0108317	0.0378336
Cygb	Inf	0.0253105	0.0623042
Afmid	Inf	0.000458182	0.00377418
Sgsh	Inf	0.019593	0.0546132
Gm11767	Inf	0.0142692	0.0435595
Nploc4	Inf	9.01539e-07	2.08553e-05
Gm16755	Inf	0.0454731	0.0878406
Slc25a10	Inf	0.00155047	0.00948161
Pycr1	Inf	0.000306079	0.00267438
Rac3	Inf	0.0253105	0.0623042
Rfng	2.75729	0.0264426	0.0644614
Hexdc	Inf	0.00267976	0.0139023
Gm47802	Inf	0.000179069	0.00176703
Gpr137b	Inf	0.0253105	0.0623042
Trgj1	Inf	0.0142692	0.0435595
Tcrg-V3	Inf	0.00226357	0.0127585
Olfr1369-ps1	Inf	0.0454731	0.0878406
Zscan12	Inf	0.0253105	0.0623042
Olfr1535	Inf	0.0454731	0.0878406
Gpld1	Inf	0.0253105	0.0623042
Txndc5	2.49045	0.01949	0.0545957
Gm28707	Inf	0.0253105	0.0623042
Kif13a	Inf	0.00811891	0.030169
Tpmt	Inf	0.0253105	0.0623042
Ptpdc1	Inf	0.0142692	0.0435595
Omd	Inf	0.0454731	0.0878406
Syk	Inf	0.000306079	0.00267438
Unc5a	Inf	0.0142692	0.0435595
Dok3	Inf	0.000306079	0.00267438
Gm47071	Inf	0.0454731	0.0878406
Klhl3	Inf	0.0142692	0.0435595
Slc28a3	Inf	0.00811891	0.030169
Spata31d1a	Inf	0.00465176	0.0206582
Etohd2	Inf	0.0253105	0.0623042
Gm48228	Inf	0.0454731	0.0878406
Zfp808	Inf	0.00811891	0.030169
Ercc6l2	2.75729	0.00642156	0.0267499
Cdk20	Inf	0.00155047	0.00948161
Gm10767	Inf	0.0142692	0.0435595
Gm28557	Inf	0.0454731	0.0878406
Rsl1	Inf	0.0142692	0.0435595
Zfp458	Inf	0.000306079	0.00267438
Zfp953	Inf	0.00267976	0.0139023
Zfp874b	Inf	1.52475e-06	3.22899e-05
Gm48899	Inf	0.0253105	0.0623042
Zfp273	Inf	0.000104952	0.00113703
Gm26819	Inf	0.0142692	0.0435595
Lrrc14b	Inf	0.0454731	0.0878406
E430024I08Rik	Inf	0.000524282	0.00411011
Gm17259	Inf	7.40353e-06	0.000128581
Mef2c	Inf	0.00267976	0.0139023
Bhmt	Inf	0.0142692	0.0435595
Sv2c	Inf	0.00811891	0.030169
Taf9	Inf	0.0454731	0.0878406
Ccdc125	Inf	9.1802e-06	0.000157022
Ccnb1	Inf	0.0253105	0.0623042
Cenpk	Inf	0.0253105	0.0623042
Plk2	Inf	0.00267976	0.0139023
Gm17509	Inf	0.0142692	0.0435595
Nnt	Inf	1.86872e-07	4.92893e-06
Gm21188	Inf	0.0142692	0.0435595
Hs1bp3	Inf	0.00155047	0.00948161
Gen1	Inf	0.00267976	0.0139023
AC124739.1	Inf	0.000306079	0.00267438
AC153140.2	Inf	0.0454731	0.0878406
Rrm2	Inf	0.00155047	0.00948161
Cmpk2	Inf	0.000524282	0.00411011
Gm48613	Inf	0.00465176	0.0206582
Sec23a	2.71281	0.030741	0.0717897
Map4k5	Inf	0.00465176	0.0206582
Pygl	Inf	0.019593	0.0546132
Sptb	Inf	0.0338612	0.0765428
Gphn	Inf	1.85861e-08	6.17107e-07
Pigh	2.84623	0.0204988	0.0564964
Gm20498	Inf	0.0253105	0.0623042
Gm26531	Inf	0.0454731	0.0878406
Ift43	Inf	0.00267976	0.0139023
Zdhhc22	Inf	0.0454731	0.0878406
Pomt2	Inf	0.0142692	0.0435595
Gm26764	Inf	0.0142692	0.0435595
Nrxn3	Inf	0.0454731	0.0878406
Flrt2	Inf	0.0338612	0.0765428
Gm47415	Inf	0.000104952	0.00113703
Gm47439	Inf	0.0454731	0.0878406
Dglucy	Inf	0.0253105	0.0623042
Otub2	Inf	0.00267976	0.0139023
Serpina3f	Inf	0.00811891	0.030169
Syne3	Inf	0.000524282	0.00411011
AC163040.1	Inf	0.0253105	0.0623042
Ccdc85c	Inf	0.0142692	0.0435595
Tnfaip2	Inf	0.0454731	0.0878406
BC022687	Inf	0.0142692	0.0435595
9230104M06Rik	Inf	0.0454731	0.0878406
Ighd	Inf	0.0253105	0.0623042
Vipr2	Inf	0.00465176	0.0206582
Ccdc152	Inf	0.00155047	0.00948161
Nup155	Inf	3.15632e-07	8.02506e-06
Ctnnd2	Inf	0.019593	0.0546132
Snhg18	Inf	0.0454731	0.0878406
Sdc2	2.5794	0.0146342	0.0444097
Pop1	Inf	0.00155047	0.00948161
Spag1	Inf	0.0142692	0.0435595
Klf10	3.00188	0.00041429	0.0034902
Deptor	Inf	0.000900271	0.00632818
Trib1	Inf	0.00465176	0.0206582
Fam84b	Inf	0.00465176	0.0206582
AC140304.2	Inf	0.0142692	0.0435595
Ndrg1	Inf	0.0142692	0.0435595
Zfat	Inf	0.0253105	0.0623042
Arc	Inf	0.0338612	0.0765428
Ly6d	Inf	0.00465176	0.0206582
Ly6k	2.66834	0.0373299	0.0820148
Ly6c1	Inf	0.00749509	0.0300253
Zfp41	Inf	0.0142692	0.0435595
Zc3h3	4.1804	0.00711561	0.0288118
Tigd5	Inf	0.0142692	0.0435595
Oplah	Inf	0.00267976	0.0139023
Tonsl	Inf	0.00267976	0.0139023
Lrrc24	Inf	0.0253105	0.0623042
Rbfox2	Inf	0.0142692	0.0435595
Apol7b	Inf	0.000524282	0.00411011
Gcat	Inf	0.000179069	0.00176703
AC113595.2	Inf	0.00811891	0.030169
Pdgfb	Inf	0.0142692	0.0435595
Polr3h	3.55779	0.0270699	0.0654928
Cyp2d22	Inf	0.0454731	0.0878406
Sult4a1	Inf	0.0253105	0.0623042
Arhgap8	Inf	0.0142692	0.0435595
Fam118a	Inf	4.54528e-09	1.64466e-07
Trmu	Inf	1.99684e-10	8.80551e-09
Zbed4	Inf	0.000524282	0.00411011
Alg12	Inf	1.41051e-06	3.06213e-05
Dennd6b	Inf	1.25555e-05	0.000202483
Rabl2	Inf	0.000306079	0.00267438
Lrrk2	Inf	0.0454731	0.0878406
Cntn1	Inf	1.86872e-07	4.92893e-06
Prickle1	Inf	6.16082e-05	0.000754325
Pus7l	Inf	9.39878e-05	0.00106333
Amigo2	Inf	0.0142692	0.0435595
Adcy6	Inf	0.0454731	0.0878406
Rnd1	Inf	0.000179069	0.00176703
Fkbp11	Inf	0.0142692	0.0435595
Prpf40b	Inf	0.00811891	0.030169
Racgap1	Inf	2.13123e-05	0.000319834
Slc4a8	Inf	0.0454731	0.0878406
Espl1	Inf	0.00811891	0.030169
Map3k12	Inf	0.00226357	0.0127585
Nfe2	Inf	0.0454731	0.0878406
Gm16861	Inf	0.0454731	0.0878406
Abat	Inf	0.0454731	0.0878406
Ciita	Inf	0.00155047	0.00948161
Snn	Inf	0.00811891	0.030169
Mpv17l	Inf	0.00465176	0.0206582
Ypel1	Inf	0.00267976	0.0139023
Txnrd2	2.5201	0.0180398	0.0521375
2023-09-05	Inf	0.0454731	0.0878406
Cdc45	Inf	0.0253105	0.0623042
Eef1akmt4	Inf	7.40353e-06	0.000128581
Fam131a	Inf	0.0454731	0.0878406
Igf2bp2	Inf	1.36553e-08	4.64318e-07
Etv5	Inf	0.0253105	0.0623042
AC161376.2	Inf	0.0253105	0.0623042
Pigz	Inf	0.0142692	0.0435595
Tfrc	Inf	0.0142692	0.0435595
Gm15564	Inf	0.0142692	0.0435595
Gramd1c	Inf	0.0253105	0.0623042
Gm4737	Inf	0.0142692	0.0435595
Morc1	Inf	0.000104952	0.00113703
Trat1	Inf	0.0454731	0.0878406
Ift57	3.55779	0.0261846	0.0640092
Alcam	Inf	0.0454731	0.0878406
Arl6	Inf	0.0454731	0.0878406
Rbm11	Inf	1.14528e-05	0.00019297
AC122509.1	Inf	0.0454731	0.0878406
Cxadr	Inf	0.0253105	0.0623042
1110004E09Rik	2.3348	0.0152961	0.0459735
Rcan1	Inf	1.52475e-06	3.22899e-05
Ripply3	Inf	0.0142692	0.0435595
Dscr3	4.13593	0.000171666	0.00173791
Pcp4	5.69246	0.00248879	0.0138117
Bace2	Inf	0.000179069	0.00176703
Fam3b	Inf	0.0454731	0.0878406
C2cd2	Inf	0.000306079	0.00267438
Gm2885	Inf	0.0454731	0.0878406
Rsph3b	Inf	0.00465176	0.0206582
AC122413.1	Inf	0.0253105	0.0623042
Rnaset2b	5.0995	2.10649e-06	4.29241e-05
Rps6ka2	Inf	0.0454731	0.0878406
E430024P14Rik	Inf	9.01539e-07	2.08553e-05
Gm16702	Inf	0.000179069	0.00176703
Afdn	Inf	0.0454731	0.0878406
Gm3448	Inf	3.6214e-05	0.00049255
Gm3435	Inf	0.0142692	0.0435595
Rgmb	Inf	0.0454731	0.0878406
AC129328.1	Inf	2.37955e-06	4.69624e-05
Spaca6	Inf	0.0454731	0.0878406
Vmn2r97	Inf	0.0142692	0.0435595
Zfp677	Inf	1.25555e-05	0.000202483
Gm5493	Inf	0.0454731	0.0878406
Flywch2	Inf	0.000524282	0.00411011
Gm43796	Inf	0.000104952	0.00113703
Tbc1d24	Inf	0.00267976	0.0139023
Tedc2	Inf	2.13123e-05	0.000319834
Rab26os	Inf	8.36374e-07	2.02612e-05
Narfl	3.82462	0.0149808	0.0452182
Ggnbp1	Inf	0.00465176	0.0206582
AC125141.1	Inf	0.0454731	0.0878406
AC125141.3	Inf	0.0454731	0.0878406
Gm15420	Inf	0.00465176	0.0206582
Uhrf1bp1	Inf	0.0142692	0.0435595
Cpne5	Inf	0.0253105	0.0623042
Dnah8	Inf	0.000900271	0.00632818
Zfp955b	Inf	0.0454731	0.0878406
Angptl4	Inf	1.6897e-09	6.53246e-08
Kank3	Inf	0.0253105	0.0623042
Kifc1	Inf	0.0066257	0.0273981
B3galt4	Inf	7.40353e-06	0.000128581
BC051537	Inf	0.0142692	0.0435595
H2-Ob	Inf	0.00811891	0.030169
Notch4	Inf	0.0454731	0.0878406
C4b	Inf	0.0454731	0.0878406
Gm20481	Inf	3.6214e-05	0.00049255
Ddah2	Inf	0.00155047	0.00948161
Gpank1	2.15246	0.0180853	0.0521663
H2-Q1	Inf	0.0454731	0.0878406
Cchcr1	2.54975	0.0151667	0.0456819
Gm20442	Inf	0.0454731	0.0878406
Prr3	5.69246	0.000219758	0.00209529
H2-T24	Inf	0.0454731	0.0878406
Gm8909	Inf	1.03666e-07	2.97022e-06
Gm20478	Inf	0.000306079	0.00267438
H2-M5	Inf	1.52475e-06	3.22899e-05
Olfr90	Inf	0.0454731	0.0878406
AY036118	2.08385	0.0180645	0.0521557
Xpo5	Inf	6.16082e-05	0.000754325
Frs3	Inf	0.0253105	0.0623042
Trem2	Inf	0.0142692	0.0435595
Oard1	2.5794	0.000485163	0.00396306
Mocs1	4.1804	0.00776728	0.030169
Chaf1a	Inf	0.00465176	0.0206582
Uhrf1	Inf	0.00283931	0.0145429
Catsperd	Inf	0.0454731	0.0878406
Gm17949	Inf	0.0253105	0.0623042
Crb3	Inf	0.0454731	0.0878406
Tubb4a	Inf	0.0253105	0.0623042
Mtcl1	Inf	0.000386665	0.00328197
Emilin2	Inf	0.0454731	0.0878406
Xdh	Inf	0.00811891	0.030169
Morn2	Inf	0.000158999	0.00163472
Prepl	Inf	1.25555e-05	0.000202483
Camkmt	Inf	0.000900271	0.00632818
Srbd1	Inf	9.01539e-07	2.08553e-05
3110002H16Rik	4.80302	0.00152057	0.00948161
Kctd1	Inf	0.0454731	0.0878406
AW554918	Inf	1.47598e-11	7.93439e-10
Pkd2l2	Inf	0.0142692	0.0435595
Kif20a	Inf	0.0142692	0.0435595
Cxxc5	Inf	0.00811891	0.030169
Nrg2	Inf	0.00811891	0.030169
3222401L13Rik	Inf	0.0253105	0.0623042
Pcdhga12	Inf	0.000900271	0.00632818
Rell2	Inf	0.00155047	0.00948161
Fchsd1	Inf	0.000104952	0.00113703
Arap3	Inf	0.0142692	0.0435595
Ccdc112	Inf	0.0253105	0.0623042
Eno1b	4.26935	0.00553978	0.0238149
Gnal	Inf	0.00465176	0.0206582
Afg3l2	2.0902	0.0454339	0.0878406
Seh1l	2.01015	0.0373862	0.0820148
Tcf4	Inf	0.000779187	0.00577175
Smad2	5.51457	0.000250085	0.00232935
Rnf165	Inf	0.000524282	0.00411011
8030462N17Rik	Inf	0.0454731	0.0878406
Slc14a1	Inf	3.6214e-05	0.00049255
Cpt1a	4.80302	0.00170484	0.0102045
1810055G02Rik	Inf	0.000203412	0.001966
Nudt8	Inf	0.00155047	0.00948161
Efemp2	Inf	0.0253105	0.0623042
Rab3il1	Inf	0.0253105	0.0623042
Fads1	Inf	0.0142692	0.0435595
Tmem138	3.73568	0.0194642	0.0545536
Ccdc86	2.97965	0.0134269	0.0435595
Ms4a1	Inf	0.0142692	0.0435595
Gm28935	Inf	0.00267976	0.0139023
Ms4a6c	2.75729	0.0269109	0.0651918
Ms4a6d	Inf	0.00155047	0.00948161
Olfr1423	Inf	0.00465176	0.0206582
Dtx4	4.89196	0.00136576	0.00891151
Gda	Inf	0.00465176	0.0206582
Ptar1	Inf	0.00155047	0.00948161
Tjp2	Inf	0.0142692	0.0435595
Dmrt2	Inf	0.0142692	0.0435595
A930007I19Rik	Inf	0.0253105	0.0623042
Papss2	Inf	0.0454731	0.0878406
Fgfbp3	Inf	0.000306079	0.00267438
Hhex	Inf	0.0253105	0.0623042
Myof	Inf	0.0454731	0.0878406
Slc35g1	Inf	1.03666e-07	2.97022e-06
Entpd1	Inf	0.0142692	0.0435595
Gm340	Inf	0.00811891	0.030169
Gm19557	Inf	0.0142692	0.0435595
Adrb1	Inf	0.0454731	0.0878406
Shtn1	Inf	6.16082e-05	0.000754325
Sfxn4	Inf	0.00811891	0.030169

## Sheet: B
Up					Down
Name	FC	pVal	Qval		Name	FC	pVal	Qval
Nelfb	Inf	3.06242e-06	0.00276742		Rpl35	0.494378	1.27338e-05	0.00895002
Dido1	Inf	0.000828566	0.1		Rpl9	0.395349	3.15584e-05	0.0166358
Atp6ap1	3.00258	0.000508158	0.0843795		Cxcl2	0.0933983	7.44789e-06	0.00588915
Gm8797	2.36453	7.49265e-05	0.0276997		Ets1	0.440489	0.000270571	0.0570517
Gyg	Inf	0.000154986	0.0377076		Sorl1	0.339095	0.00020305	0.0475717
Snapin	Inf	2.89744e-05	0.0166358		Gm10260	0.441048	1.91135e-05	0.0120906
Tifa	Inf	0.000517333	0.0843795		Gm42418	0.406087	0.000402728	0.0771982
Mknk1	Inf	0.000713709	0.0960577
Akr7a5	Inf	0.000154986	0.0377076
Dnajc2	Inf	0.000237548	0.0518159
Kctd10	Inf	0.000828566	0.1
Aldh2	2.10181	0.000626816	0.0960577
Ubc	4.53312	4.83057e-09	1.01856e-05
Copg1	Inf	0.000517333	0.0843795
Suclg2	Inf	0.000713709	0.0960577
Ccdc9	Inf	0.000473633	0.0843795
Vps36	Inf	5.06986e-05	0.020044
Rnf166	Inf	0.000713709	0.0960577
Tpm3-rs7	3.00258	0.000769312	0.1
Ppan	Inf	0.000154986	0.0377076
Poldip2	Inf	7.88205e-05	0.0276997
Cog1	Inf	0.000713709	0.0960577
Cd83	3.0562	0.000113207	0.0341006
Ncoa1	Inf	0.000473633	0.0843795
Prpf39	7.39922	0.000380374	0.0751918
Isca2	Inf	3.49174e-05	0.0169905
Gpr132	Inf	0.000713709	0.0960577
Poldip3	Inf	0.000713709	0.0960577
AY036118	9.32946	4.79248e-05	0.020044
Ccnd3	3.61919	1.50529e-08	2.38051e-05
Rab5a	Inf	4.53338e-05	0.020044
Sh3gl1	Inf	0.000154986	0.0377076
Coro1b	4.82558	0.000657253	0.0960577
Frmd8	Inf	8.86591e-05	0.0295174
Wbp1l	Inf	0.000828566	0.1

[truncated: 2 more sheets: ILC2, ILC3]
