# Supplementary material for: Single-cell analysis of the aged ovarian immune system reveals a shift towards adaptive immunity and attenuated cell function
Source: eLife. 2023 Apr 25;12:e74915. doi: 10.7554/eLife.74915 (PMC10188116; doi:10.7554/eLife.74915)
Supplement: Supplementary file 2. [file elife-74915-supp2.xlsx]

## Sheet: Detailed List
Neutrophils			Macrophages			Dendritic			NK cells			ILC1			NKT cells			CD8 T cells			CD4 T cells			DNT cells			B cells			ILC2			ILC3
Go Term	Term name	Log10 (p value)	Go Term	Term name	Log10 (p value)	Go Term	Term name	Log10 (p value)	Go Term	Term name	Log10 (p value)	Go Term	Term name	Log10 (p value)	Go Term	Term name	Log10 (p value)	Go Term	Term name	Log10 (p value)	Go Term	Term name	Log10 (p value)	Go Term	Term name	Log10 (p value)	Go Term	Term name	Log10 (p value)	Go Term	Term name	Log10 (p value)	Go Term	Term name	Log10 (p value)
GO:0000165	MAPK cascade	-2.42136	GO:0000165	MAPK cascade	-3.76955	GO:0001558	regulation of cell growth	-1.83863	GO:0006139	nucleobase-containing compound metabolic process	-5.3019	GO:0000165	MAPK cascade	-1.63264	GO:0000122	negative regulation of transcription by RNA polymerase II	-2.52871	GO:0006139	nucleobase-containing compound metabolic process	-8.36957	GO:0006518	peptide metabolic process	-6.19586	GO:0000165	MAPK cascade	-2.25493	GO:0006518	peptide metabolic process	-1.59517	GO:0010467	gene expression	-1.50864
GO:0001660	fever generation	-1.3439	GO:0001501	skeletal system development	-2.23359	GO:0001816	cytokine production	-3.4698	GO:0006725	cellular aromatic compound metabolic process	-4.77211	GO:0002252	immune effector process	-2.0716	GO:0001816	cytokine production	-1.50864	GO:0006325	chromatin organization	-3.85699	GO:0034641	cellular nitrogen compound metabolic process	-1.88273	GO:0000278	mitotic cell cycle	-1.99568				GO:0019827	stem cell population maintenance	-1.48149
GO:0001775	cell activation	-3.81816	GO:0001503	ossification	-3.63078	GO:0001817	regulation of cytokine production	-4.04431	GO:0006807	nitrogen compound metabolic process	-2.78781	GO:0002376	immune system process	-5.00745	GO:0001817	regulation of cytokine production	-1.50169	GO:0006357	regulation of transcription by RNA polymerase II	-1.98297	GO:0043603	amide metabolic process	-4.89279	GO:0001503	ossification	-1.66555				GO:0034641	cellular nitrogen compound metabolic process	-1.84164
GO:0001816	cytokine production	-3.07676	GO:0001568	blood vessel development	-11.8356	GO:0001961	positive regulation of cytokine-mediated signaling pathway	-2.80967	GO:0006915	apoptotic process	-3.38934	GO:0002520	immune system development	-3.91364	GO:0001959	regulation of cytokine-mediated signaling pathway	-2.01457	GO:0006366	transcription by RNA polymerase II	-1.99568	GO:1901566	organonitrogen compound biosynthetic process	-1.3279	GO:0001649	osteoblast differentiation	-1.67162				GO:0090169	regulation of spindle assembly	-1.31069
GO:0002376	immune system process	-9.17849	GO:0001763	morphogenesis of a branching structure	-4.25337	GO:0002237	response to molecule of bacterial origin	-3.19586	GO:0008219	cell death	-3.33255	GO:0002682	regulation of immune system process	-3.45593	GO:0002376	immune system process	-4.38828	GO:0006397	mRNA processing	-1.64397				GO:0001660	fever generation	-1.81816				GO:0098727	maintenance of cell number	-1.43533
GO:0002520	immune system development	-5.8729	GO:0001775	cell activation	-3.0752	GO:0002285	lymphocyte activation involved in immune response	-1.91721	GO:0009059	macromolecule biosynthetic process	-1.85387	GO:0006139	nucleobase-containing compound metabolic process	-9.40121	GO:0002521	leukocyte differentiation	-2.61083	GO:0006479	protein methylation	-3.24413				GO:0001775	cell activation	-2.42713
GO:0002521	leukocyte differentiation	-4.28819	GO:0001816	cytokine production	-11.3809	GO:0002376	immune system process	-5.77469	GO:0009966	regulation of signal transduction	-1.56864	GO:0006259	DNA metabolic process	-1.77211	GO:0002682	regulation of immune system process	-2.04479	GO:0006725	cellular aromatic compound metabolic process	-7.74958				GO:0001816	cytokine production	-3.6073
GO:0002682	regulation of immune system process	-2.80134	GO:0001817	regulation of cytokine production	-11.0926	GO:0002520	immune system development	-7.20412	GO:0010467	gene expression	-3.86328	GO:0006325	chromatin organization	-2.91721	GO:0002683	negative regulation of immune system process	-3.72584	GO:0006793	phosphorus metabolic process	-3.17134				GO:0001932	regulation of protein phosphorylation	-3.0048
GO:0002684	positive regulation of immune system process	-2.71897	GO:0001932	regulation of protein phosphorylation	-9.75449	GO:0002682	regulation of immune system process	-4.7167	GO:0010605	negative regulation of macromolecule metabolic process	-1.98297	GO:0006357	regulation of transcription by RNA polymerase II	-8.75696	GO:0006139	nucleobase-containing compound metabolic process	-4.8962	GO:0006796	phosphate-containing compound metabolic process	-2.91364				GO:0002376	immune system process	-7.83268
GO:0002825	regulation of T-helper 1 type immune response	-1.82102	GO:0001957	intramembranous ossification	-3.0381	GO:0006139	nucleobase-containing compound metabolic process	-27.8996	GO:0010941	regulation of cell death	-2.75945	GO:0006366	transcription by RNA polymerase II	-8.86967	GO:0006351	DNA-templated transcription	-3.25026	GO:0006807	nitrogen compound metabolic process	-10.9281				GO:0002520	immune system development	-7.2321
GO:0003018	vascular process in circulatory system	-1.3019	GO:0002237	response to molecule of bacterial origin	-3.42946	GO:0006259	DNA metabolic process	-5.96257	GO:0016070	RNA metabolic process	-4.05948	GO:0006468	protein phosphorylation	-7.11919	GO:0006357	regulation of transcription by RNA polymerase II	-3.7167	GO:0006950	response to stress	-3.15677				GO:0002682	regulation of immune system process	-5.34294
GO:0006351	DNA-templated transcription	-1.767	GO:0002376	immune system process	-15.9706	GO:0006260	DNA replication	-2.66154	GO:0019219	regulation of nucleobase-containing compound metabolic process	-3.53313	GO:0006518	peptide metabolic process	-3.25414	GO:0006366	transcription by RNA polymerase II	-4.77211	GO:0006996	organelle organization	-5.06449				GO:0002687	positive regulation of leukocyte migration	-5.79048
GO:0006357	regulation of transcription by RNA polymerase II	-3.42136	GO:0002682	regulation of immune system process	-10.8508	GO:0006325	chromatin organization	-4.65956	GO:0019222	regulation of metabolic process	-2.88606	GO:0006725	cellular aromatic compound metabolic process	-7.6925	GO:0006518	peptide metabolic process	-3.34486	GO:0008152	metabolic process	-9.93181				GO:0006139	nucleobase-containing compound metabolic process	-14.3179
GO:0006366	transcription by RNA polymerase II	-3.17718	GO:0003158	endothelium development	-1.94692	GO:0006357	regulation of transcription by RNA polymerase II	-17.3019	GO:0022613	ribonucleoprotein complex biogenesis	-2.13136	GO:0006793	phosphorus metabolic process	-5.23508	GO:0006725	cellular aromatic compound metabolic process	-5.19111	GO:0008213	protein alkylation	-3.24413				GO:0006325	chromatin organization	-4.50169
GO:0006468	protein phosphorylation	-1.60033	GO:0006139	nucleobase-containing compound metabolic process	-6.13787	GO:0006366	transcription by RNA polymerase II	-17.8297	GO:0034641	cellular nitrogen compound metabolic process	-5.36351	GO:0006807	nitrogen compound metabolic process	-18.9666	GO:0006807	nitrogen compound metabolic process	-7.4437	GO:0009058	biosynthetic process	-4.66154				GO:0006357	regulation of transcription by RNA polymerase II	-13.5901
GO:0006950	response to stress	-10.4572	GO:0006325	chromatin organization	-1.67366	GO:0006396	RNA processing	-6.5784	GO:0034645	cellular macromolecule biosynthetic process	-2.09474	GO:0006915	apoptotic process	-3.32975	GO:0006915	apoptotic process	-3.44009	GO:0009059	macromolecule biosynthetic process	-3.67572				GO:0006366	transcription by RNA polymerase II	-12.5272
GO:0006954	inflammatory response	-4.93181	GO:0006351	DNA-templated transcription	-12.3904	GO:0006397	mRNA processing	-4.85078	GO:0042981	regulation of apoptotic process	-3.4168	GO:0006950	response to stress	-5.92812	GO:0006950	response to stress	-3.18575	GO:0009123	nucleoside monophosphate metabolic process	-1.78781				GO:0006412	translation	-6.10018
GO:0006979	response to oxidative stress	-2.40894	GO:0006357	regulation of transcription by RNA polymerase II	-14.4112	GO:0006468	protein phosphorylation	-3.58503	GO:0043170	macromolecule metabolic process	-2.10791	GO:0006996	organelle organization	-9.41454	GO:0006952	defense response	-1.38934	GO:0009892	negative regulation of metabolic process	-4.44977				GO:0006468	protein phosphorylation	-3.1261
GO:0007155	cell adhesion	-1.91364	GO:0006366	transcription by RNA polymerase II	-14.0106	GO:0006725	cellular aromatic compound metabolic process	-24.8633	GO:0044237	cellular metabolic process	-2.95078	GO:0007041	lysosomal transport	-1.64397	GO:0007249	I-kappaB kinase/NF-kappaB signaling	-2.13371	GO:0009987	cellular process	-1.97469				GO:0006725	cellular aromatic compound metabolic process	-13.5391
GO:0007162	negative regulation of cell adhesion	-1.5986	GO:0006468	protein phosphorylation	-10.5302	GO:0006793	phosphorus metabolic process	-3.33819	GO:0044238	primary metabolic process	-2.21325	GO:0007049	cell cycle	-1.77469	GO:0007275	multicellular organism development	-1.42366	GO:0010467	gene expression	-6.86646				GO:0006793	phosphorus metabolic process	-2.28483
GO:0007166	cell surface receptor signaling pathway	-2.88941	GO:0006725	cellular aromatic compound metabolic process	-6.20343	GO:0006807	nitrogen compound metabolic process	-27.9318	GO:0044260	cellular macromolecule metabolic process	-2.27491	GO:0007166	cell surface receptor signaling pathway	-4.80688	GO:0008152	metabolic process	-7.04191	GO:0016070	RNA metabolic process	-5.24489				GO:0006796	phosphate-containing compound metabolic process	-2.42597
GO:0007249	I-kappaB kinase/NF-kappaB signaling	-2.53018	GO:0006793	phosphorus metabolic process	-7.41794	GO:0006915	apoptotic process	-6.80967	GO:0046483	heterocycle metabolic process	-4.92445	GO:0007275	multicellular organism development	-5.69465	GO:0008219	cell death	-3.56384	GO:0016071	mRNA metabolic process	-1.76955				GO:0006807	nitrogen compound metabolic process	-22.6498
GO:0008219	cell death	-8.08991	GO:0006807	nitrogen compound metabolic process	-13.1637	GO:0006950	response to stress	-8.62525	GO:0048519	negative regulation of biological process	-2.34008	GO:0008152	metabolic process	-13.3401	GO:0009058	biosynthetic process	-4.39686	GO:0016570	histone modification	-5.0348				GO:0006915	apoptotic process	-2.79048
GO:0008283	cell population proliferation	-2.88941	GO:0006809	nitric oxide biosynthetic process	-2.4908	GO:0006984	ER-nucleus signaling pathway	-1.73755	GO:0071704	organic substance metabolic process	-1.42136	GO:0008219	cell death	-3.63264	GO:0009059	macromolecule biosynthetic process	-6.27246	GO:0018130	heterocycle biosynthetic process	-2.77469				GO:0006950	response to stress	-8.39147
GO:0009058	biosynthetic process	-2.1945	GO:0006810	transport	-3.8962	GO:0006986	response to unfolded protein	-1.47108	GO:0071840	cellular component organization or biogenesis	-1.87615	GO:0009056	catabolic process	-2.63827	GO:0009615	response to virus	-1.51713	GO:0018193	peptidyl-amino acid modification	-3.61083				GO:0006979	response to oxidative stress	-1.88941
GO:0009059	macromolecule biosynthetic process	-2.07366	GO:0006915	apoptotic process	-7.05012	GO:0006996	organelle organization	-8.16685	GO:0090304	nucleic acid metabolic process	-5.31785	GO:0009057	macromolecule catabolic process	-4.96257	GO:0009892	negative regulation of metabolic process	-5.24033	GO:0018205	peptidyl-lysine modification	-3.4389				GO:0006996	organelle organization	-10.061
GO:0009410	response to xenobiotic stimulus	-2.22475	GO:0006950	response to stress	-21.2076	GO:0007249	I-kappaB kinase/NF-kappaB signaling	-1.8962	GO:1901360	organic cyclic compound metabolic process	-4.3019	GO:0009058	biosynthetic process	-13.7799	GO:0009987	cellular process	-1.36957	GO:0019222	regulation of metabolic process	-4.73049				GO:0007041	lysosomal transport	-1.49894
GO:0009605	response to external stimulus	-3.34872	GO:0006952	defense response	-9.24642	GO:0008152	metabolic process	-21.4401	GO:2000112	regulation of cellular macromolecule biosynthetic process	-2.62893	GO:0009059	macromolecule biosynthetic process	-18.6498	GO:0010467	gene expression	-7.01502	GO:0019438	aromatic compound biosynthetic process	-3.04287				GO:0007049	cell cycle	-1.87943
GO:0009607	response to biotic stimulus	-4.00393	GO:0006954	inflammatory response	-2.64397	GO:0008219	cell death	-8.80967				GO:0009966	regulation of signal transduction	-5.38828	GO:0010646	regulation of cell communication	-3.40561	GO:0019538	protein metabolic process	-7.17134				GO:0007166	cell surface receptor signaling pathway	-1.97062
GO:0010035	response to inorganic substance	-1.4168	GO:0006979	response to oxidative stress	-1.58838	GO:0008380	RNA splicing	-2.43297				GO:0009987	cellular process	-3.48812	GO:0016043	cellular component organization	-1.79588	GO:0030521	androgen receptor signaling pathway	-2.48945				GO:0008152	metabolic process	-18.757
GO:0010646	regulation of cell communication	-3.78252	GO:0006996	organelle organization	-7.11464	GO:0009056	catabolic process	-2.85387				GO:0010467	gene expression	-9.16178	GO:0016070	RNA metabolic process	-5.29328	GO:0031323	regulation of cellular metabolic process	-5.24642				GO:0008219	cell death	-3.27737
GO:0010941	regulation of cell death	-7.06048	GO:0007155	cell adhesion	-3.61979	GO:0009057	macromolecule catabolic process	-4.62893				GO:0010604	positive regulation of macromolecule metabolic process	-9.49757	GO:0016310	phosphorylation	-1.81531	GO:0031399	regulation of protein modification process	-4.48812				GO:0008283	cell population proliferation	-1.68194
GO:0016310	phosphorylation	-1.48017	GO:0007159	leukocyte cell-cell adhesion	-1.84771	GO:0009058	biosynthetic process	-13.5129				GO:0010638	positive regulation of organelle organization	-2.3851	GO:0018130	heterocycle biosynthetic process	-2.38828	GO:0031400	negative regulation of protein modification process	-4.02273				GO:0009056	catabolic process	-4.86328
GO:0018130	heterocycle biosynthetic process	-1.36856	GO:0007166	cell surface receptor signaling pathway	-7.86646	GO:0009059	macromolecule biosynthetic process	-18.0119				GO:0010646	regulation of cell communication	-3.33161	GO:0019222	regulation of metabolic process	-6.67985	GO:0032259	methylation	-1.54821				GO:0009057	macromolecule catabolic process	-7.51428
GO:0019222	regulation of metabolic process	-3.89963	GO:0007167	enzyme-linked receptor protein signaling pathway	-3.1261	GO:0009410	response to xenobiotic stimulus	-2.08092				GO:0010941	regulation of cell death	-3.95861	GO:0019438	aromatic compound biosynthetic process	-2.3536	GO:0032446	protein modification by small protein conjugation	-2.93554				GO:0009058	biosynthetic process	-16.6596
GO:0019438	aromatic compound biosynthetic process	-1.34872	GO:0008104	protein localization	-4.97881	GO:0009607	response to biotic stimulus	-3.25885				GO:0016070	RNA metabolic process	-7.5817	GO:0019538	protein metabolic process	-4.24642	GO:0033044	regulation of chromosome organization	-1.31605				GO:0009059	macromolecule biosynthetic process	-21.699
GO:0023051	regulation of signaling	-3.70553	GO:0008152	metabolic process	-15.2976	GO:0009628	response to abiotic stimulus	-1.43771				GO:0016197	endosomal transport	-2.32057	GO:0022613	ribonucleoprotein complex biogenesis	-2.42597	GO:0033365	protein localization to organelle	-2.00568				GO:0009605	response to external stimulus	-2.86012
GO:0030155	regulation of cell adhesion	-2.54975	GO:0008219	cell death	-8.5376	GO:0009987	cellular process	-3.31695				GO:0016310	phosphorylation	-9.12033	GO:0023051	regulation of signaling	-3.29671	GO:0033554	cellular response to stress	-3.04383				GO:0009607	response to biotic stimulus	-1.38934
GO:0030335	positive regulation of cell migration	-2.98297	GO:0008283	cell population proliferation	-7.44249	GO:0010467	gene expression	-22.9208				GO:0016567	protein ubiquitination	-6.10679	GO:0031323	regulation of cellular metabolic process	-6.46852	GO:0033993	response to lipid	-2.01728				GO:0009628	response to abiotic stimulus	-4.04769
GO:0031326	regulation of cellular biosynthetic process	-3.9393	GO:0008285	negative regulation of cell population proliferation	-5.35067	GO:0010604	positive regulation of macromolecule metabolic process	-17.3098				GO:0016570	histone modification	-1.30539	GO:0032502	developmental process	-1.83565	GO:0034641	cellular nitrogen compound metabolic process	-9.5544				GO:0009790	embryo development	-1.81531
GO:0031399	regulation of protein modification process	-1.37469	GO:0009056	catabolic process	-4.20971	GO:0010605	negative regulation of macromolecule metabolic process	-9.19997				GO:0018130	heterocycle biosynthetic process	-8.03339	GO:0032602	chemokine production	-1.49214	GO:0034645	cellular macromolecule biosynthetic process	-3.85699				GO:0009894	regulation of catabolic process	-2.20412
GO:0032101	regulation of response to external stimulus	-3.69037	GO:0009058	biosynthetic process	-14.7721	GO:0010941	regulation of cell death	-6.57512				GO:0018193	peptidyl-amino acid modification	-2.13847	GO:0032635	interleukin-6 production	-2.64589	GO:0034654	nucleobase-containing compound biosynthetic process	-3.05998				GO:0009966	regulation of signal transduction	-6.82391
GO:0032103	positive regulation of response to external stimulus	-2.44009	GO:0009059	macromolecule biosynthetic process	-13.0381	GO:0015833	peptide transport	-3.0348				GO:0019222	regulation of metabolic process	-11.5229	GO:0032675	regulation of interleukin-6 production	-2.86646	GO:0036211	protein modification process	-10.3215				GO:0009987	cellular process	-8.68403
GO:0032502	developmental process	-2.30016	GO:0009410	response to xenobiotic stimulus	-2.05404	GO:0016032	viral process	-3.75945				GO:0019438	aromatic compound biosynthetic process	-8.20273	GO:0034641	cellular nitrogen compound metabolic process	-8.1945	GO:0043170	macromolecule metabolic process	-7.11182				GO:0010467	gene expression	-16.4763
GO:0032879	regulation of localization	-1.3536	GO:0009605	response to external stimulus	-12.4547	GO:0016049	cell growth	-3.55909				GO:0019538	protein metabolic process	-16.7282	GO:0034645	cellular macromolecule biosynthetic process	-5.63451	GO:0043412	macromolecule modification	-9.9393				GO:0010469	regulation of signaling receptor activity	-2.20482
GO:0033002	muscle cell proliferation	-2.89279	GO:0009607	response to biotic stimulus	-10.7328	GO:0016070	RNA metabolic process	-26.2291				GO:0022607	cellular component assembly	-3.07366	GO:0035556	intracellular signal transduction	-1.82102	GO:0043414	macromolecule methylation	-2.30539				GO:0010586	miRNA metabolic process	-2.90309
GO:0033554	cellular response to stress	-8.09854	GO:0009611	response to wounding	-5.13847	GO:0016071	mRNA metabolic process	-7.10846				GO:0023051	regulation of signaling	-3.57187	GO:0036211	protein modification process	-1.61618	GO:0043933	protein-containing complex organization	-1.45717				GO:0010606	positive regulation of cytoplasmic mRNA processing body assembly	-2.75203
GO:0034103	regulation of tissue remodeling	-1.30539	GO:0009628	response to abiotic stimulus	-3.45593	GO:0016310	phosphorylation	-6.28567				GO:0030030	cell projection organization	-2.11634	GO:0042325	regulation of phosphorylation	-1.32422	GO:0044237	cellular metabolic process	-13.9208				GO:0010608	post-transcriptional regulation of gene expression	-4.7986
GO:0034641	cellular nitrogen compound metabolic process	-1.84164	GO:0009719	response to endogenous stimulus	-4.67778	GO:0016570	histone modification	-2.68403				GO:0030097	hemopoiesis	-3.11919	GO:0042981	regulation of apoptotic process	-1.38722	GO:0044238	primary metabolic process	-9.61261				GO:0010646	regulation of cell communication	-5.76447
GO:0034645	cellular macromolecule biosynthetic process	-1.85699	GO:0009966	regulation of signal transduction	-12.1427	GO:0018130	heterocycle biosynthetic process	-15.1726				GO:0031323	regulation of cellular metabolic process	-12.7212	GO:0043170	macromolecule metabolic process	-7.62342	GO:0044249	cellular biosynthetic process	-4.767				GO:0010941	regulation of cell death	-3.07779
GO:0035556	intracellular signal transduction	-4.14267	GO:0009987	cellular process	-8.7986	GO:0019222	regulation of metabolic process	-19.383				GO:0031399	regulation of protein modification process	-5.06198	GO:0043412	macromolecule modification	-2.08725	GO:0044260	cellular macromolecule metabolic process	-7.52871				GO:0010942	positive regulation of cell death	-2.85699
GO:0038034	signal transduction in absence of ligand	-2.73993	GO:0009991	response to extracellular stimulus	-1.63264	GO:0019438	aromatic compound biosynthetic process	-15.0306				GO:0031400	negative regulation of protein modification process	-3.23958	GO:0043603	amide metabolic process	-1.84466	GO:0044271	cellular nitrogen compound biosynthetic process	-3.81531				GO:0015833	peptide transport	-1.5867
GO:0038066	p38MAPK cascade	-2.89963	GO:0010035	response to inorganic substance	-2.1986	GO:0019538	protein metabolic process	-11.767				GO:0032502	developmental process	-3.84466	GO:0044237	cellular metabolic process	-7.96658	GO:0045936	negative regulation of phosphate metabolic process	-2.5986				GO:0016032	viral process	-2.68194
GO:0040012	regulation of locomotion	-1.56384	GO:0010467	gene expression	-8.85078	GO:0022407	regulation of cell-cell adhesion	-1.41908				GO:0033554	cellular response to stress	-3.91721	GO:0044238	primary metabolic process	-6.17653	GO:0046483	heterocycle metabolic process	-7.65758				GO:0016049	cell growth	-1.31426
GO:0042088	T-helper 1 type immune response	-2.63639	GO:0010638	positive regulation of organelle organization	-1.87943	GO:0022613	ribonucleoprotein complex biogenesis	-2.49757				GO:0034641	cellular nitrogen compound metabolic process	-11.0283	GO:0044249	cellular biosynthetic process	-4.71444	GO:0048518	positive regulation of biological process	-4.20412				GO:0016070	RNA metabolic process	-14.3089
GO:0042127	regulation of cell population proliferation	-3.68825	GO:0010646	regulation of cell communication	-11.2487	GO:0030097	hemopoiesis	-5.78516				GO:0034645	cellular macromolecule biosynthetic process	-18.4522	GO:0044260	cellular macromolecule metabolic process	-7.37572	GO:0048519	negative regulation of biological process	-2.73049				GO:0016071	mRNA metabolic process	-1.67985
GO:0042221	response to chemical	-2.91721	GO:0010941	regulation of cell death	-8.27003	GO:0031399	regulation of protein modification process	-5.4023				GO:0034654	nucleobase-containing compound biosynthetic process	-8.69897	GO:0044271	cellular nitrogen compound biosynthetic process	-4.83863	GO:0048522	positive regulation of cellular process	-5.51713				GO:0016567	protein ubiquitination	-4.23284
GO:0043065	positive regulation of apoptotic process	-9.3363	GO:0015833	peptide transport	-2.8729	GO:0032446	protein modification by small protein conjugation	-6.26761				GO:0035239	tube morphogenesis	-1.58336	GO:0046136	positive regulation of vitamin metabolic process	-1.63827	GO:0048583	regulation of response to stimulus	-2.32698				GO:0016570	histone modification	-4.8041
GO:0043154	negative regulation of cysteine-type endopeptidase activity involved in apoptotic process	-1.6925	GO:0016032	viral process	-3.11976	GO:0032502	developmental process	-1.82681				GO:0035556	intracellular signal transduction	-3.47496	GO:0046483	heterocycle metabolic process	-5.06148	GO:0051128	regulation of cellular component organization	-1.54821				GO:0018130	heterocycle biosynthetic process	-10.7305
GO:0043408	regulation of MAPK cascade	-2.03012	GO:0016070	RNA metabolic process	-9.11862	GO:0033036	macromolecule localization	-2.98297				GO:0036211	protein modification process	-16.9666	GO:0048518	positive regulation of biological process	-5.16749	GO:0051174	regulation of phosphorus metabolic process	-2.5544				GO:0019222	regulation of metabolic process	-19.5114
GO:0044249	cellular biosynthetic process	-1.66555	GO:0016310	phosphorylation	-10.1051	GO:0033554	cellular response to stress	-10.857				GO:0042127	regulation of cell population proliferation	-1.77989	GO:0048519	negative regulation of biological process	-4.44977	GO:0051246	regulation of protein metabolic process	-3.6517				GO:0019438	aromatic compound biosynthetic process	-10.6289
GO:0044271	cellular nitrogen compound biosynthetic process	-1.83565	GO:0016477	cell migration	-8.17783	GO:0034097	response to cytokine	-5.64016				GO:0042325	regulation of phosphorylation	-5.12784	GO:0048522	positive regulation of cellular process	-5.16115	GO:0051276	chromosome organization	-5.01323				GO:0019538	protein metabolic process	-17.6308
GO:0048513	animal organ development	-3.42946	GO:0016567	protein ubiquitination	-7.16178	GO:0034340	response to type I interferon	-2.88606				GO:0042981	regulation of apoptotic process	-3.92445	GO:0048534	hematopoietic or lymphoid organ development	-2.39686	GO:0051338	regulation of transferase activity	-3.27246				GO:0022407	regulation of cell-cell adhesion	-1.42481
GO:0048518	positive regulation of biological process	-5.01233	GO:0016570	histone modification	-1.9431	GO:0034641	cellular nitrogen compound metabolic process	-27.2782				GO:0043170	macromolecule metabolic process	-21.6737	GO:0048583	regulation of response to stimulus	-6.1986	GO:0060334	regulation of type II interferon-mediated signaling pathway	-1.40121				GO:0023051	regulation of signaling	-5.80134
GO:0048519	negative regulation of biological process	-6.64782	GO:0018130	heterocycle biosynthetic process	-10.8013	GO:0034645	cellular macromolecule biosynthetic process	-17.8697				GO:0043412	macromolecule modification	-16.6326	GO:0051052	regulation of DNA metabolic process	-1.66756	GO:0065003	protein-containing complex assembly	-3.5376				GO:0030097	hemopoiesis	-7.19382
GO:0048523	negative regulation of cellular process	-6.29585	GO:0018193	peptidyl-amino acid modification	-2.26841	GO:0034654	nucleobase-containing compound biosynthetic process	-15.8697				GO:0043603	amide metabolic process	-1.84164	GO:0051246	regulation of protein metabolic process	-2.83863	GO:0065009	regulation of molecular function	-1.39254				GO:0031323	regulation of cellular metabolic process	-20.4023
GO:0048534	hematopoietic or lymphoid organ development	-5.43415	GO:0019079	viral genome replication	-3.75945	GO:0035456	response to interferon-beta	-2.64207				GO:0043933	protein-containing complex organization	-2.60206	GO:0060558	regulation of calcidiol 1-monooxygenase activity	-1.57187	GO:0070647	protein modification by small protein conjugation or removal	-2.73518				GO:0031399	regulation of protein modification process	-5.57025
GO:0048583	regulation of response to stimulus	-6.7122	GO:0019222	regulation of metabolic process	-22.4089	GO:0035556	intracellular signal transduction	-3.71444				GO:0044085	cellular component biogenesis	-4.31605	GO:0060759	regulation of response to cytokine stimulus	-2.63639	GO:0070887	cellular response to chemical stimulus	-1.31336				GO:0031622	positive regulation of fever generation	-2.52288
GO:0048646	anatomical structure formation involved in morphogenesis	-1.92445	GO:0019438	aromatic compound biosynthetic process	-11.2434	GO:0036211	protein modification process	-11.4698				GO:0044087	regulation of cellular component biogenesis	-1.40894	GO:0071345	cellular response to cytokine stimulus	-3.15428	GO:0071704	organic substance metabolic process	-8.36452				GO:0031650	regulation of heat generation	-1.71444
GO:0048659	smooth muscle cell proliferation	-1.79588	GO:0019538	protein metabolic process	-11.5436	GO:0040007	growth	-2.77469				GO:0044237	cellular metabolic process	-19.8097	GO:0071704	organic substance metabolic process	-7.21325	GO:0071840	cellular component organization or biogenesis	-4.00745				GO:0032496	response to lipopolysaccharide	-2.77989
GO:0048660	regulation of smooth muscle cell proliferation	-1.88273	GO:0022407	regulation of cell-cell adhesion	-3.8962	GO:0040008	regulation of growth	-1.56703				GO:0044238	primary metabolic process	-18.8097	GO:0071840	cellular component organization or biogenesis	-2.52578	GO:0080134	regulation of response to stress	-3.42597				GO:0032502	developmental process	-6.15739
GO:0048661	positive regulation of smooth muscle cell proliferation	-2.66555	GO:0022607	cellular component assembly	-3.11126	GO:0042886	amide transport	-2.97469				GO:0044249	cellular biosynthetic process	-14.3372	GO:0080134	regulation of response to stress	-5.08355	GO:0090304	nucleic acid metabolic process	-5.84771				GO:0032633	interleukin-4 production	-1.49621
GO:0048771	tissue remodeling	-1.88273	GO:0022612	gland morphogenesis	-2.61618	GO:0042981	regulation of apoptotic process	-5.58336				GO:0044260	cellular macromolecule metabolic process	-31.9957	GO:0090304	nucleic acid metabolic process	-5.98716	GO:1901360	organic cyclic compound metabolic process	-8.37161				GO:0032673	regulation of interleukin-4 production	-2.05998
GO:0050789	regulation of biological process	-2.13787	GO:0023051	regulation of signaling	-11.5287	GO:0043170	macromolecule metabolic process	-26.5272				GO:0044265	cellular macromolecule catabolic process	-3.81248	GO:1901360	organic cyclic compound metabolic process	-5.55129	GO:1901362	organic cyclic compound biosynthetic process	-3.43297				GO:0032713	negative regulation of interleukin-4 production	-1.57349
GO:0050790	regulation of catalytic activity	-3.01323	GO:0030097	hemopoiesis	-5.46725	GO:0043412	macromolecule modification	-13.2865				GO:0044271	cellular nitrogen compound biosynthetic process	-12.8416	GO:1901362	organic cyclic compound biosynthetic process	-2.56864	GO:1901564	organonitrogen compound metabolic process	-7.82681				GO:0032879	regulation of localization	-4.41908
GO:0050793	regulation of developmental process	-1.98297	GO:0030155	regulation of cell adhesion	-5.65365	GO:0043618	regulation of transcription from RNA polymerase II promoter in response to stress	-6.26841				GO:0045653	negative regulation of megakaryocyte differentiation	-3.22475	GO:1901564	organonitrogen compound metabolic process	-4.14752	GO:1901566	organonitrogen compound biosynthetic process	-1.54668				GO:0033036	macromolecule localization	-3.79588
GO:0050896	response to stimulus	-3.35262	GO:0030198	extracellular matrix organization	-2.5376	GO:0043620	regulation of DNA-templated transcription in response to stress	-5.66555				GO:0045664	regulation of neuron differentiation	-2.47108	GO:1901576	organic substance biosynthetic process	-4.40121	GO:1901576	organic substance biosynthetic process	-5.04335				GO:0033043	regulation of organelle organization	-2.45967
GO:0051093	negative regulation of developmental process	-1.44129	GO:0030278	regulation of ossification	-1.67778	GO:0043903	regulation of biological process involved in symbiotic interaction	-1.51004				GO:0046483	heterocycle metabolic process	-8.18046	GO:2000112	regulation of cellular macromolecule biosynthetic process	-3.39147	GO:2000112	regulation of cellular macromolecule biosynthetic process	-1.78252				GO:0033554	cellular response to stress	-4.92812
GO:0051094	positive regulation of developmental process	-2.82681	GO:0030334	regulation of cell migration	-10.5003	GO:0043933	protein-containing complex organization	-2.56384				GO:0046777	protein autophosphorylation	-1.57512										GO:0033962	P-body assembly	-4.30803
GO:0051174	regulation of phosphorus metabolic process	-1.67366	GO:0030522	intracellular receptor signaling pathway	-1.56067	GO:0044237	cellular metabolic process	-31.9101				GO:0046854	phosphatidylinositol phosphate biosynthetic process	-1.6925										GO:0034113	heterotypic cell-cell adhesion	-3.06601
GO:0051239	regulation of multicellular organismal process	-3.06905	GO:0031323	regulation of cellular metabolic process	-22.983	GO:0044238	primary metabolic process	-25.2832				GO:0048518	positive regulation of biological process	-8.48678										GO:0034248	regulation of amide metabolic process	-4.55909
GO:0051240	positive regulation of multicellular organismal process	-4.10791	GO:0031399	regulation of protein modification process	-12.4342	GO:0044249	cellular biosynthetic process	-15.1701				GO:0048519	negative regulation of biological process	-13.7959										GO:0034641	cellular nitrogen compound metabolic process	-19.2865
GO:0051246	regulation of protein metabolic process	-1.58838	GO:0031650	regulation of heat generation	-1.71444	GO:0044260	cellular macromolecule metabolic process	-25.5638				GO:0048523	negative regulation of cellular process	-14.9208										GO:0034645	cellular macromolecule biosynthetic process	-20.585
GO:0051707	response to other organism	-4.34969	GO:0031667	response to nutrient levels	-2.23657	GO:0044265	cellular macromolecule catabolic process	-3.84466				GO:0048534	hematopoietic or lymphoid organ development	-2.68825										GO:0034654	nucleobase-containing compound biosynthetic process	-10.2204
GO:0051716	cellular response to stimulus	-2.00833	GO:0032501	multicellular organismal process	-5.16749	GO:0044271	cellular nitrogen compound biosynthetic process	-14.7167				GO:0048583	regulation of response to stimulus	-5.64782										GO:0035556	intracellular signal transduction	-5.27246
GO:0065007	biological regulation	-2.73283	GO:0032502	developmental process	-16.0391	GO:0044403	biological process involved in symbiotic interaction	-3.71897				GO:0050793	regulation of developmental process	-5.22841										GO:0036211	protein modification process	-16.0191
GO:0065009	regulation of molecular function	-2.70553	GO:0032879	regulation of localization	-7.27901	GO:0044419	biological process involved in interspecies interaction between organisms	-3.39147				GO:0051128	regulation of cellular component organization	-6.25885										GO:0036293	response to decreased oxygen levels	-1.38828
GO:0070887	cellular response to chemical stimulus	-6.78516	GO:0032963	collagen metabolic process	-3.48812	GO:0046483	heterocycle metabolic process	-25.8297				GO:0051174	regulation of phosphorus metabolic process	-4.3279										GO:0040007	growth	-2.04721
GO:0071456	cellular response to hypoxia	-2.88273	GO:0033002	muscle cell proliferation	-3.98297	GO:0046834	lipid phosphorylation	-1.63451				GO:0051239	regulation of multicellular organismal process	-4.53611										GO:0040008	regulation of growth	-2.13608
GO:0080135	regulation of cellular response to stress	-2.75203	GO:0033036	macromolecule localization	-4.33068	GO:0046854	phosphatidylinositol phosphate biosynthetic process	-2.89279				GO:0051246	regulation of protein metabolic process	-4.93554										GO:0040011	locomotion	-1.47625
GO:0090304	nucleic acid metabolic process	-1.37161	GO:0034641	cellular nitrogen compound metabolic process	-8.57349	GO:0046907	intracellular transport	-6.23958				GO:0051276	chromosome organization	-3.86328										GO:0042592	homeostatic process	-1.62709
GO:0097191	extrinsic apoptotic signaling pathway	-7.9393	GO:0034645	cellular macromolecule biosynthetic process	-11.2457	GO:0048518	positive regulation of biological process	-12.7905				GO:0051338	regulation of transferase activity	-5.59517										GO:0042886	amide transport	-1.67572
GO:0097530	granulocyte migration	-2.75945	GO:0034968	histone lysine methylation	-2.26281	GO:0048519	negative regulation of biological process	-8.08831				GO:0051641	cellular localization	-2.17914										GO:0043112	receptor metabolic process	-3.09528
GO:1900745	positive regulation of p38MAPK cascade	-2.30364	GO:0035239	tube morphogenesis	-10.8125	GO:0048525	negative regulation of viral process	-2.67778				GO:0060011	Sertoli cell proliferation	-2.70553										GO:0043170	macromolecule metabolic process	-25.3585
GO:1901576	organic substance biosynthetic process	-1.92445	GO:0035455	response to interferon-alpha	-2.55752	GO:0048534	hematopoietic or lymphoid organ development	-5.55596				GO:0065009	regulation of molecular function	-2.47366										GO:0043412	macromolecule modification	-15.7932
GO:1901698	response to nitrogen compound	-1.86967	GO:0035456	response to interferon-beta	-4.82102	GO:0048583	regulation of response to stimulus	-2.767				GO:0070486	leukocyte aggregation	-1.78252										GO:0043603	amide metabolic process	-5.011
GO:1905952	regulation of lipid localization	-2.25727	GO:0035457	cellular response to interferon-alpha	-2.27246	GO:0050790	regulation of catalytic activity	-4.82102				GO:0070647	protein modification by small protein conjugation or removal	-5.91364										GO:0043903	regulation of biological process involved in symbiotic interaction	-1.86012
GO:1905954	positive regulation of lipid localization	-1.30892	GO:0035458	cellular response to interferon-beta	-4.05012	GO:0050792	regulation of viral process	-2.02182				GO:0071310	cellular response to organic substance	-6.38091										GO:0044237	cellular metabolic process	-25.3125
GO:2000112	regulation of cellular macromolecule biosynthetic process	-2.97469	GO:0035556	intracellular signal transduction	-11.1391	GO:0051128	regulation of cellular component organization	-4.92812				GO:0071704	organic substance metabolic process	-15.8013										GO:0044238	primary metabolic process	-22.0292
			GO:0036072	direct ossification	-3.0381	GO:0051171	regulation of nitrogen compound metabolic process	-22.5622				GO:0071840	cellular component organization or biogenesis	-10.7773										GO:0044249	cellular biosynthetic process	-16.762
			GO:0036211	protein modification process	-16.7986	GO:0051174	regulation of phosphorus metabolic process	-2.15739				GO:0090304	nucleic acid metabolic process	-9.8729										GO:0044260	cellular macromolecule metabolic process	-30.4802
			GO:0036293	response to decreased oxygen levels	-1.89963	GO:0051246	regulation of protein metabolic process	-9.25571				GO:0120036	plasma membrane bounded cell projection organization	-1.82681										GO:0044265	cellular macromolecule catabolic process	-6.98716
			GO:0040007	growth	-2.83268	GO:0051276	chromosome organization	-4.5784				GO:1901360	organic cyclic compound metabolic process	-6.69037										GO:0044271	cellular nitrogen compound biosynthetic process	-17.2823
			GO:0040011	locomotion	-6.12552	GO:0051641	cellular localization	-5.94692				GO:1901362	organic cyclic compound biosynthetic process	-7.74958										GO:0044419	biological process involved in interspecies interaction between organisms	-2.68403
			GO:0040012	regulation of locomotion	-8.58503	GO:0060337	type I interferon-mediated signaling pathway	-2.78516				GO:1901564	organonitrogen compound metabolic process	-12.5935										GO:0045071	negative regulation of viral genome replication	-1.73518
			GO:0042060	wound healing	-3.7986	GO:0060759	regulation of response to cytokine stimulus	-2.39041				GO:1901566	organonitrogen compound biosynthetic process	-2.17328										GO:0045595	regulation of cell differentiation	-7.96658
			GO:0042127	regulation of cell population proliferation	-7.52288	GO:0065009	regulation of molecular function	-3.48945				GO:1901576	organic substance biosynthetic process	-14.1864										GO:0045661	regulation of myoblast differentiation	-1.42251
			GO:0042136	neurotransmitter biosynthetic process	-1.55284	GO:0070647	protein modification by small protein conjugation or removal	-7.41794				GO:1901700	response to oxygen-containing compound	-3.70115										GO:0045672	positive regulation of osteoclast differentiation	-4.89963
			GO:0042221	response to chemical	-4.43415	GO:0070887	cellular response to chemical stimulus	-4.53165				GO:1904707	positive regulation of vascular associated smooth muscle cell proliferation	-1.56067										GO:0046483	heterocycle metabolic process	-13.8182
			GO:0042592	homeostatic process	-6.77469	GO:0070988	demethylation	-2.17522				GO:1990874	vascular associated smooth muscle cell proliferation	-1.40012										GO:0048513	animal organ development	-2.13371
			GO:0042886	amide transport	-2.63078	GO:0071216	cellular response to biotic stimulus	-4.29414				GO:2000026	regulation of multicellular organismal development	-3.95468										GO:0048518	positive regulation of biological process	-15.6345
			GO:0042981	regulation of apoptotic process	-7.62893	GO:0071396	cellular response to lipid	-4.32422				GO:2000112	regulation of cellular macromolecule biosynthetic process	-9.07417										GO:0048519	negative regulation of biological process	-20.1739
			GO:0043009	chordate embryonic development	-1.91009	GO:0071557	histone H3-K27 demethylation	-1.95861																GO:0048522	positive regulation of cellular process	-16.6799
			GO:0043062	extracellular structure organization	-1.93181	GO:0071704	organic substance metabolic process	-21.1367																GO:0048523	negative regulation of cellular process	-15.4001
			GO:0043170	macromolecule metabolic process	-12.7595	GO:0071705	nitrogen compound transport	-1.96257																GO:0048534	hematopoietic or lymphoid organ development	-7.46852
			GO:0043277	apoptotic cell clearance	-2.54061	GO:0071706	tumor necrosis factor superfamily cytokine production	-2.18177																GO:0048583	regulation of response to stimulus	-7.42022
			GO:0043412	macromolecule modification	-16.767	GO:0071840	cellular component organization or biogenesis	-8.1798																GO:0048870	cell motility	-2.12321
			GO:0043491	protein kinase B signaling	-3.06753	GO:0080134	regulation of response to stress	-6.77469																GO:0050792	regulation of viral process	-3.07935
			GO:0043618	regulation of transcription from RNA polymerase II promoter in response to stress	-2.18442	GO:0090304	nucleic acid metabolic process	-28.5171																GO:0050793	regulation of developmental process	-6.20971
			GO:0043620	regulation of DNA-templated transcription in response to stress	-1.84466	GO:1901360	organic cyclic compound metabolic process	-22.8633																GO:0050794	regulation of cellular process	-7.48017
			GO:0043903	regulation of biological process involved in symbiotic interaction	-1.6038	GO:1901362	organic cyclic compound biosynthetic process	-14.6345																GO:0050900	leukocyte migration	-7.27901
			GO:0043933	protein-containing complex organization	-2.07572	GO:1901564	organonitrogen compound metabolic process	-9.09909																GO:0051093	negative regulation of developmental process	-3.19586
			GO:0044085	cellular component biogenesis	-2.40782	GO:1901576	organic substance biosynthetic process	-14.1772																GO:0051128	regulation of cellular component organization	-4.60033
			GO:0044237	cellular metabolic process	-18.6737	GO:1901701	cellular response to oxygen-containing compound	-4.20343																GO:0051174	regulation of phosphorus metabolic process	-2.18709
			GO:0044238	primary metabolic process	-12.9355	GO:1902532	negative regulation of intracellular signal transduction	-1.73518																GO:0051179	localization	-2.74473
			GO:0044248	cellular catabolic process	-4.93554	GO:1903555	regulation of tumor necrosis factor superfamily cytokine production	-2.34008																GO:0051239	regulation of multicellular organismal process	-5.5784
			GO:0044249	cellular biosynthetic process	-13.1739	GO:2000112	regulation of cellular macromolecule biosynthetic process	-16.3665																GO:0051246	regulation of protein metabolic process	-8.64589
			GO:0044260	cellular macromolecule metabolic process	-18.5607																			GO:0051276	chromosome organization	-3.83565
			GO:0044271	cellular nitrogen compound biosynthetic process	-12.2573																			GO:0051641	cellular localization	-5.34679
			GO:0044403	biological process involved in symbiotic interaction	-4.39254																			GO:0051649	establishment of localization in cell	-3.62893
			GO:0044419	biological process involved in interspecies interaction between organisms	-4.69465																			GO:0051674	localization of cell	-2.12321
			GO:0044706	multi-multicellular organism process	-1.57512																			GO:0051726	regulation of cell cycle	-1.65365
			GO:0045071	negative regulation of viral genome replication	-6.20482																			GO:0052472	modulation by host of symbiont transcription	-2.34199
			GO:0045087	innate immune response	-12.4895																			GO:0061614	miRNA transcription	-1.6517
			GO:0045428	regulation of nitric oxide biosynthetic process	-2.15739																			GO:0065007	biological regulation	-7.09151
			GO:0045444	fat cell differentiation	-1.33348																			GO:0065008	regulation of biological quality	-4.1945
			GO:0045595	regulation of cell differentiation	-6.2652																			GO:0065009	regulation of molecular function	-1.41341
			GO:0045861	negative regulation of proteolysis	-1.97469																			GO:0070098	chemokine-mediated signaling pathway	-2.97881
			GO:0046483	heterocycle metabolic process	-6.04915																			GO:0070482	response to oxygen levels	-1.383
			GO:0046903	secretion	-1.33348																			GO:0070647	protein modification by small protein conjugation or removal	-3.85387
			GO:0048518	positive regulation of biological process	-23.6778																			GO:0070887	cellular response to chemical stimulus	-8.41005
			GO:0048519	negative regulation of biological process	-28.9914																			GO:0071466	cellular response to xenobiotic stimulus	-1.53165
			GO:0048522	positive regulation of cellular process	-23.118																			GO:0071704	organic substance metabolic process	-20.295
			GO:0048523	negative regulation of cellular process	-25.9101																			GO:0071705	nitrogen compound transport	-1.60033
			GO:0048534	hematopoietic or lymphoid organ development	-5.59346																			GO:0071840	cellular component organization or biogenesis	-7.77211
			GO:0048583	regulation of response to stimulus	-13.399																			GO:0072594	establishment of protein localization to organelle	-1.84771
			GO:0048589	developmental growth	-1.86328																			GO:0090304	nucleic acid metabolic process	-15.8928
			GO:0048659	smooth muscle cell proliferation	-4.42022																			GO:0090503	RNA phosphodiester bond hydrolysis, exonucleolytic	-2.28988
			GO:0048732	gland development	-1.87943																			GO:1901031	regulation of response to reactive oxygen species	-2.34294
			GO:0048771	tissue remodeling	-4.13966																			GO:1901360	organic cyclic compound metabolic process	-12.9355
			GO:0048856	anatomical structure development	-15.5498																			GO:1901362	organic cyclic compound biosynthetic process	-9.91364
			GO:0048870	cell motility	-7.15428																			GO:1901564	organonitrogen compound metabolic process	-14.0809
			GO:0048872	homeostasis of number of cells	-3.78516																			GO:1901566	organonitrogen compound biosynthetic process	-5.53165
			GO:0050790	regulation of catalytic activity	-11.5638																			GO:1901576	organic substance biosynthetic process	-17.0264
			GO:0050792	regulation of viral process	-2.17914																			GO:1901698	response to nitrogen compound	-1.63827
			GO:0050793	regulation of developmental process	-9.92082																			GO:1902882	regulation of response to oxidative stress	-2.21681
			GO:0050794	regulation of cellular process	-11.7959																			GO:1903311	regulation of mRNA metabolic process	-1.33255
			GO:0050896	response to stimulus	-7.72125																			GO:1904761	negative regulation of myofibroblast differentiation	-1.42366
			GO:0051049	regulation of transport	-2.28988																			GO:1990090	cellular response to nerve growth factor stimulus	-1.47108
			GO:0051093	negative regulation of developmental process	-2.29671																			GO:2000112	regulation of cellular macromolecule biosynthetic process	-16.5287
			GO:0051128	regulation of cellular component organization	-8.55284
			GO:0051146	striated muscle cell differentiation	-1.38828
			GO:0051174	regulation of phosphorus metabolic process	-8.59176
			GO:0051179	localization	-9.53018
			GO:0051239	regulation of multicellular organismal process	-18.9245
			GO:0051246	regulation of protein metabolic process	-14.6421
			GO:0051276	chromosome organization	-1.56864
			GO:0051641	cellular localization	-4.8729
			GO:0051674	localization of cell	-7.15428
			GO:0051716	cellular response to stimulus	-6.72584
			GO:0051726	regulation of cell cycle	-1.81531
			GO:0051896	regulation of protein kinase B signaling	-2.72584
			GO:0051897	positive regulation of protein kinase B signaling	-2.91364
			GO:0055123	digestive system development	-1.44855
			GO:0060343	trabecula formation	-3.09151
			GO:0060759	regulation of response to cytokine stimulus	-2.61618
			GO:0060760	positive regulation of response to cytokine stimulus	-3.01412
			GO:0061383	trabecula morphogenesis	-2.65758
			GO:0065007	biological regulation	-12.585
			GO:0065008	regulation of biological quality	-7.40561
			GO:0065009	regulation of molecular function	-15.9245
			GO:0070371	ERK1 and ERK2 cascade	-2.9393
			GO:0070482	response to oxygen levels	-1.75696
			GO:0070647	protein modification by small protein conjugation or removal	-7.70553
			GO:0070887	cellular response to chemical stimulus	-20.6216
			GO:0071230	cellular response to amino acid stimulus	-3.47237
			GO:0071363	cellular response to growth factor stimulus	-3.68403
			GO:0071466	cellular response to xenobiotic stimulus	-1.95078
			GO:0071604	transforming growth factor beta production	-1.64589
			GO:0071702	organic substance transport	-2.53018
			GO:0071704	organic substance metabolic process	-13.1593
			GO:0071705	nitrogen compound transport	-2.29757
			GO:0071840	cellular component organization or biogenesis	-13.2175
			GO:0072593	reactive oxygen species metabolic process	-1.56543
			GO:0090304	nucleic acid metabolic process	-7.28651
			GO:0098609	cell-cell adhesion	-1.76447
			GO:1901360	organic cyclic compound metabolic process	-5.77211
			GO:1901362	organic cyclic compound biosynthetic process	-10.567
			GO:1901564	organonitrogen compound metabolic process	-11.2441
			GO:1901576	organic substance biosynthetic process	-12.9586
			GO:1901698	response to nitrogen compound	-1.94692
			GO:1903409	reactive oxygen species biosynthetic process	-2.451
			GO:1903426	regulation of reactive oxygen species biosynthetic process	-2.63639
			GO:2000108	positive regulation of leukocyte apoptotic process	-3.59346
			GO:2000112	regulation of cellular macromolecule biosynthetic process	-12.3585
			GO:2000377	regulation of reactive oxygen species metabolic process	-1.72816
			GO:2001057	reactive nitrogen species metabolic process	-1.81816

## Sheet: All Go terms list
GO:0000165	MAPK cascade
GO:0001660	fever generation
GO:0001775	cell activation
GO:0001816	cytokine production
GO:0002376	immune system process
GO:0002520	immune system development
GO:0002521	leukocyte differentiation
GO:0002682	regulation of immune system process
GO:0002684	positive regulation of immune system process
GO:0002825	regulation of T-helper 1 type immune response
GO:0003018	vascular process in circulatory system
GO:0006351	DNA-templated transcription
GO:0006357	regulation of transcription by RNA polymerase II
GO:0006366	transcription by RNA polymerase II
GO:0006468	protein phosphorylation
GO:0006950	response to stress
GO:0006954	inflammatory response
GO:0006979	response to oxidative stress
GO:0007155	cell adhesion
GO:0007162	negative regulation of cell adhesion
GO:0007166	cell surface receptor signaling pathway
GO:0007249	I-kappaB kinase/NF-kappaB signaling
GO:0008219	cell death
GO:0008283	cell population proliferation
GO:0009058	biosynthetic process
GO:0009059	macromolecule biosynthetic process
GO:0009410	response to xenobiotic stimulus
GO:0009605	response to external stimulus
GO:0009607	response to biotic stimulus
GO:0010035	response to inorganic substance
GO:0010646	regulation of cell communication
GO:0010941	regulation of cell death
GO:0016310	phosphorylation
GO:0018130	heterocycle biosynthetic process
GO:0019222	regulation of metabolic process
GO:0019438	aromatic compound biosynthetic process
GO:0023051	regulation of signaling
GO:0030155	regulation of cell adhesion
GO:0030335	positive regulation of cell migration
GO:0031326	regulation of cellular biosynthetic process
GO:0031399	regulation of protein modification process
GO:0032101	regulation of response to external stimulus
GO:0032103	positive regulation of response to external stimulus
GO:0032502	developmental process
GO:0032879	regulation of localization
GO:0033002	muscle cell proliferation
GO:0033554	cellular response to stress
GO:0034103	regulation of tissue remodeling
GO:0034641	cellular nitrogen compound metabolic process
GO:0034645	cellular macromolecule biosynthetic process
GO:0035556	intracellular signal transduction
GO:0038034	signal transduction in absence of ligand
GO:0038066	p38MAPK cascade
GO:0040012	regulation of locomotion
GO:0042088	T-helper 1 type immune response
GO:0042127	regulation of cell population proliferation
GO:0042221	response to chemical
GO:0043065	positive regulation of apoptotic process
GO:0043154	negative regulation of cysteine-type endopeptidase activity involved in apoptotic process
GO:0043408	regulation of MAPK cascade
GO:0044249	cellular biosynthetic process
GO:0044271	cellular nitrogen compound biosynthetic process
GO:0048513	animal organ development
GO:0048518	positive regulation of biological process
GO:0048519	negative regulation of biological process
GO:0048523	negative regulation of cellular process
GO:0048534	hematopoietic or lymphoid organ development
GO:0048583	regulation of response to stimulus
GO:0048646	anatomical structure formation involved in morphogenesis
GO:0048659	smooth muscle cell proliferation
GO:0048660	regulation of smooth muscle cell proliferation
GO:0048661	positive regulation of smooth muscle cell proliferation
GO:0048771	tissue remodeling
GO:0050789	regulation of biological process
GO:0050790	regulation of catalytic activity
GO:0050793	regulation of developmental process
GO:0050896	response to stimulus
GO:0051093	negative regulation of developmental process
GO:0051094	positive regulation of developmental process
GO:0051174	regulation of phosphorus metabolic process
GO:0051239	regulation of multicellular organismal process
GO:0051240	positive regulation of multicellular organismal process
GO:0051246	regulation of protein metabolic process
GO:0051707	response to other organism
GO:0051716	cellular response to stimulus
GO:0065007	biological regulation
GO:0065009	regulation of molecular function
GO:0070887	cellular response to chemical stimulus
GO:0071456	cellular response to hypoxia
GO:0080135	regulation of cellular response to stress
GO:0090304	nucleic acid metabolic process
GO:0097191	extrinsic apoptotic signaling pathway
GO:0097530	granulocyte migration
GO:1900745	positive regulation of p38MAPK cascade
GO:1901576	organic substance biosynthetic process
GO:1901698	response to nitrogen compound
GO:1905952	regulation of lipid localization
GO:1905954	positive regulation of lipid localization
GO:2000112	regulation of cellular macromolecule biosynthetic process
GO:0000165	MAPK cascade
GO:0001501	skeletal system development
GO:0001503	ossification
GO:0001568	blood vessel development
GO:0001763	morphogenesis of a branching structure
GO:0001775	cell activation
GO:0001816	cytokine production
GO:0001817	regulation of cytokine production
GO:0001932	regulation of protein phosphorylation
GO:0001957	intramembranous ossification
GO:0002237	response to molecule of bacterial origin
GO:0002376	immune system process
GO:0002682	regulation of immune system process
GO:0003158	endothelium development
GO:0006139	nucleobase-containing compound metabolic process
GO:0006325	chromatin organization
GO:0006351	DNA-templated transcription
GO:0006357	regulation of transcription by RNA polymerase II
GO:0006366	transcription by RNA polymerase II
GO:0006468	protein phosphorylation
GO:0006725	cellular aromatic compound metabolic process
GO:0006793	phosphorus metabolic process
GO:0006807	nitrogen compound metabolic process
GO:0006809	nitric oxide biosynthetic process
GO:0006810	transport
GO:0006915	apoptotic process
GO:0006950	response to stress
GO:0006952	defense response
GO:0006954	inflammatory response
GO:0006979	response to oxidative stress
GO:0006996	organelle organization
GO:0007155	cell adhesion
GO:0007159	leukocyte cell-cell adhesion
GO:0007166	cell surface receptor signaling pathway
GO:0007167	enzyme-linked receptor protein signaling pathway
GO:0008104	protein localization
GO:0008152	metabolic process
GO:0008219	cell death
GO:0008283	cell population proliferation
GO:0008285	negative regulation of cell population proliferation
GO:0009056	catabolic process
GO:0009058	biosynthetic process
GO:0009059	macromolecule biosynthetic process
GO:0009410	response to xenobiotic stimulus
GO:0009605	response to external stimulus
GO:0009607	response to biotic stimulus
GO:0009611	response to wounding
GO:0009628	response to abiotic stimulus
GO:0009719	response to endogenous stimulus
GO:0009966	regulation of signal transduction
GO:0009987	cellular process
GO:0009991	response to extracellular stimulus
GO:0010035	response to inorganic substance
GO:0010467	gene expression
GO:0010638	positive regulation of organelle organization
GO:0010646	regulation of cell communication
GO:0010941	regulation of cell death
GO:0015833	peptide transport
GO:0016032	viral process
GO:0016070	RNA metabolic process
GO:0016310	phosphorylation
GO:0016477	cell migration
GO:0016567	protein ubiquitination
GO:0016570	histone modification
GO:0018130	heterocycle biosynthetic process
GO:0018193	peptidyl-amino acid modification
GO:0019079	viral genome replication
GO:0019222	regulation of metabolic process
GO:0019438	aromatic compound biosynthetic process
GO:0019538	protein metabolic process
GO:0022407	regulation of cell-cell adhesion
GO:0022607	cellular component assembly
GO:0022612	gland morphogenesis
GO:0023051	regulation of signaling
GO:0030097	hemopoiesis
GO:0030155	regulation of cell adhesion
GO:0030198	extracellular matrix organization
GO:0030278	regulation of ossification
GO:0030334	regulation of cell migration
GO:0030522	intracellular receptor signaling pathway
GO:0031323	regulation of cellular metabolic process
GO:0031399	regulation of protein modification process
GO:0031650	regulation of heat generation
GO:0031667	response to nutrient levels
GO:0032501	multicellular organismal process
GO:0032502	developmental process
GO:0032879	regulation of localization
GO:0032963	collagen metabolic process
GO:0033002	muscle cell proliferation
GO:0033036	macromolecule localization
GO:0034641	cellular nitrogen compound metabolic process
GO:0034645	cellular macromolecule biosynthetic process
GO:0034968	histone lysine methylation
GO:0035239	tube morphogenesis
GO:0035455	response to interferon-alpha
GO:0035456	response to interferon-beta
GO:0035457	cellular response to interferon-alpha
GO:0035458	cellular response to interferon-beta
GO:0035556	intracellular signal transduction
GO:0036072	direct ossification
GO:0036211	protein modification process
GO:0036293	response to decreased oxygen levels
GO:0040007	growth
GO:0040011	locomotion
GO:0040012	regulation of locomotion
GO:0042060	wound healing
GO:0042127	regulation of cell population proliferation
GO:0042136	neurotransmitter biosynthetic process
GO:0042221	response to chemical
GO:0042592	homeostatic process
GO:0042886	amide transport
GO:0042981	regulation of apoptotic process
GO:0043009	chordate embryonic development
GO:0043062	extracellular structure organization
GO:0043170	macromolecule metabolic process
GO:0043277	apoptotic cell clearance
GO:0043412	macromolecule modification
GO:0043491	protein kinase B signaling
GO:0043618	regulation of transcription from RNA polymerase II promoter in response to stress
GO:0043620	regulation of DNA-templated transcription in response to stress
GO:0043903	regulation of biological process involved in symbiotic interaction
GO:0043933	protein-containing complex organization
GO:0044085	cellular component biogenesis
GO:0044237	cellular metabolic process
GO:0044238	primary metabolic process
GO:0044248	cellular catabolic process
GO:0044249	cellular biosynthetic process
GO:0044260	cellular macromolecule metabolic process
GO:0044271	cellular nitrogen compound biosynthetic process
GO:0044403	biological process involved in symbiotic interaction
GO:0044419	biological process involved in interspecies interaction between organisms
GO:0044706	multi-multicellular organism process
GO:0045071	negative regulation of viral genome replication
GO:0045087	innate immune response
GO:0045428	regulation of nitric oxide biosynthetic process
GO:0045444	fat cell differentiation
GO:0045595	regulation of cell differentiation
GO:0045861	negative regulation of proteolysis
GO:0046483	heterocycle metabolic process
GO:0046903	secretion
GO:0048518	positive regulation of biological process
GO:0048519	negative regulation of biological process
GO:0048522	positive regulation of cellular process
GO:0048523	negative regulation of cellular process
GO:0048534	hematopoietic or lymphoid organ development
GO:0048583	regulation of response to stimulus
GO:0048589	developmental growth
GO:0048659	smooth muscle cell proliferation
GO:0048732	gland development
GO:0048771	tissue remodeling
GO:0048856	anatomical structure development
GO:0048870	cell motility
GO:0048872	homeostasis of number of cells
GO:0050790	regulation of catalytic activity
GO:0050792	regulation of viral process
GO:0050793	regulation of developmental process
GO:0050794	regulation of cellular process
GO:0050896	response to stimulus
GO:0051049	regulation of transport
GO:0051093	negative regulation of developmental process
GO:0051128	regulation of cellular component organization
GO:0051146	striated muscle cell differentiation
GO:0051174	regulation of phosphorus metabolic process
GO:0051179	localization
GO:0051239	regulation of multicellular organismal process
GO:0051246	regulation of protein metabolic process
GO:0051276	chromosome organization
GO:0051641	cellular localization
GO:0051674	localization of cell
GO:0051716	cellular response to stimulus
GO:0051726	regulation of cell cycle
GO:0051896	regulation of protein kinase B signaling
GO:0051897	positive regulation of protein kinase B signaling
GO:0055123	digestive system development
GO:0060343	trabecula formation
GO:0060759	regulation of response to cytokine stimulus
GO:0060760	positive regulation of response to cytokine stimulus
GO:0061383	trabecula morphogenesis
GO:0065007	biological regulation
GO:0065008	regulation of biological quality
GO:0065009	regulation of molecular function
GO:0070371	ERK1 and ERK2 cascade
GO:0070482	response to oxygen levels
GO:0070647	protein modification by small protein conjugation or removal
GO:0070887	cellular response to chemical stimulus
GO:0071230	cellular response to amino acid stimulus
GO:0071363	cellular response to growth factor stimulus
GO:0071466	cellular response to xenobiotic stimulus
GO:0071604	transforming growth factor beta production
GO:0071702	organic substance transport
GO:0071704	organic substance metabolic process
GO:0071705	nitrogen compound transport
GO:0071840	cellular component organization or biogenesis
GO:0072593	reactive oxygen species metabolic process
GO:0090304	nucleic acid metabolic process
GO:0098609	cell-cell adhesion
GO:1901360	organic cyclic compound metabolic process
GO:1901362	organic cyclic compound biosynthetic process
GO:1901564	organonitrogen compound metabolic process
GO:1901576	organic substance biosynthetic process
GO:1901698	response to nitrogen compound
GO:1903409	reactive oxygen species biosynthetic process
GO:1903426	regulation of reactive oxygen species biosynthetic process
GO:2000108	positive regulation of leukocyte apoptotic process
GO:2000112	regulation of cellular macromolecule biosynthetic process
GO:2000377	regulation of reactive oxygen species metabolic process
GO:2001057	reactive nitrogen species metabolic process
GO:0001558	regulation of cell growth
GO:0001816	cytokine production
GO:0001817	regulation of cytokine production
GO:0001961	positive regulation of cytokine-mediated signaling pathway
GO:0002237	response to molecule of bacterial origin
GO:0002285	lymphocyte activation involved in immune response
GO:0002376	immune system process
GO:0002520	immune system development
GO:0002682	regulation of immune system process
GO:0006139	nucleobase-containing compound metabolic process
GO:0006259	DNA metabolic process
GO:0006260	DNA replication
GO:0006325	chromatin organization
GO:0006357	regulation of transcription by RNA polymerase II
GO:0006366	transcription by RNA polymerase II
GO:0006396	RNA processing
GO:0006397	mRNA processing
GO:0006468	protein phosphorylation
GO:0006725	cellular aromatic compound metabolic process
GO:0006793	phosphorus metabolic process
GO:0006807	nitrogen compound metabolic process
GO:0006915	apoptotic process
GO:0006950	response to stress
GO:0006984	ER-nucleus signaling pathway
GO:0006986	response to unfolded protein
GO:0006996	organelle organization
GO:0007249	I-kappaB kinase/NF-kappaB signaling
GO:0008152	metabolic process
GO:0008219	cell death
GO:0008380	RNA splicing
GO:0009056	catabolic process
GO:0009057	macromolecule catabolic process
GO:0009058	biosynthetic process
GO:0009059	macromolecule biosynthetic process
GO:0009410	response to xenobiotic stimulus
GO:0009607	response to biotic stimulus
GO:0009628	response to abiotic stimulus
GO:0009987	cellular process
GO:0010467	gene expression
GO:0010604	positive regulation of macromolecule metabolic process
GO:0010605	negative regulation of macromolecule metabolic process
GO:0010941	regulation of cell death
GO:0015833	peptide transport
GO:0016032	viral process
GO:0016049	cell growth
GO:0016070	RNA metabolic process
GO:0016071	mRNA metabolic process
GO:0016310	phosphorylation
GO:0016570	histone modification
GO:0018130	heterocycle biosynthetic process
GO:0019222	regulation of metabolic process
GO:0019438	aromatic compound biosynthetic process
GO:0019538	protein metabolic process
GO:0022407	regulation of cell-cell adhesion
GO:0022613	ribonucleoprotein complex biogenesis
GO:0030097	hemopoiesis
GO:0031399	regulation of protein modification process
GO:0032446	protein modification by small protein conjugation
GO:0032502	developmental process
GO:0033036	macromolecule localization
GO:0033554	cellular response to stress
GO:0034097	response to cytokine
GO:0034340	response to type I interferon
GO:0034641	cellular nitrogen compound metabolic process
GO:0034645	cellular macromolecule biosynthetic process
GO:0034654	nucleobase-containing compound biosynthetic process
GO:0035456	response to interferon-beta
GO:0035556	intracellular signal transduction
GO:0036211	protein modification process
GO:0040007	growth
GO:0040008	regulation of growth
GO:0042886	amide transport
GO:0042981	regulation of apoptotic process
GO:0043170	macromolecule metabolic process
GO:0043412	macromolecule modification
GO:0043618	regulation of transcription from RNA polymerase II promoter in response to stress
GO:0043620	regulation of DNA-templated transcription in response to stress
GO:0043903	regulation of biological process involved in symbiotic interaction
GO:0043933	protein-containing complex organization
GO:0044237	cellular metabolic process
GO:0044238	primary metabolic process
GO:0044249	cellular biosynthetic process
GO:0044260	cellular macromolecule metabolic process
GO:0044265	cellular macromolecule catabolic process
GO:0044271	cellular nitrogen compound biosynthetic process
GO:0044403	biological process involved in symbiotic interaction
GO:0044419	biological process involved in interspecies interaction between organisms
GO:0046483	heterocycle metabolic process
GO:0046834	lipid phosphorylation
GO:0046854	phosphatidylinositol phosphate biosynthetic process
GO:0046907	intracellular transport
GO:0048518	positive regulation of biological process
GO:0048519	negative regulation of biological process
GO:0048525	negative regulation of viral process
GO:0048534	hematopoietic or lymphoid organ development
GO:0048583	regulation of response to stimulus
GO:0050790	regulation of catalytic activity
GO:0050792	regulation of viral process
GO:0051128	regulation of cellular component organization
GO:0051171	regulation of nitrogen compound metabolic process
GO:0051174	regulation of phosphorus metabolic process
GO:0051246	regulation of protein metabolic process
GO:0051276	chromosome organization
GO:0051641	cellular localization
GO:0060337	type I interferon-mediated signaling pathway
GO:0060759	regulation of response to cytokine stimulus
GO:0065009	regulation of molecular function
GO:0070647	protein modification by small protein conjugation or removal
GO:0070887	cellular response to chemical stimulus
GO:0070988	demethylation
GO:0071216	cellular response to biotic stimulus
GO:0071396	cellular response to lipid
GO:0071557	histone H3-K27 demethylation
GO:0071704	organic substance metabolic process
GO:0071705	nitrogen compound transport
GO:0071706	tumor necrosis factor superfamily cytokine production
GO:0071840	cellular component organization or biogenesis
GO:0080134	regulation of response to stress
GO:0090304	nucleic acid metabolic process
GO:1901360	organic cyclic compound metabolic process
GO:1901362	organic cyclic compound biosynthetic process
GO:1901564	organonitrogen compound metabolic process
GO:1901576	organic substance biosynthetic process
GO:1901701	cellular response to oxygen-containing compound
GO:1902532	negative regulation of intracellular signal transduction
GO:1903555	regulation of tumor necrosis factor superfamily cytokine production
GO:2000112	regulation of cellular macromolecule biosynthetic process
GO:0006139	nucleobase-containing compound metabolic process
GO:0006725	cellular aromatic compound metabolic process
GO:0006807	nitrogen compound metabolic process
GO:0006915	apoptotic process
GO:0008219	cell death
GO:0009059	macromolecule biosynthetic process
GO:0009966	regulation of signal transduction
GO:0010467	gene expression
GO:0010605	negative regulation of macromolecule metabolic process
GO:0010941	regulation of cell death
GO:0016070	RNA metabolic process
GO:0019219	regulation of nucleobase-containing compound metabolic process
GO:0019222	regulation of metabolic process
GO:0022613	ribonucleoprotein complex biogenesis
GO:0034641	cellular nitrogen compound metabolic process
GO:0034645	cellular macromolecule biosynthetic process
GO:0042981	regulation of apoptotic process
GO:0043170	macromolecule metabolic process
GO:0044237	cellular metabolic process
GO:0044238	primary metabolic process
GO:0044260	cellular macromolecule metabolic process
GO:0046483	heterocycle metabolic process
GO:0048519	negative regulation of biological process
GO:0071704	organic substance metabolic process
GO:0071840	cellular component organization or biogenesis
GO:0090304	nucleic acid metabolic process
GO:1901360	organic cyclic compound metabolic process
GO:2000112	regulation of cellular macromolecule biosynthetic process
GO:0000165	MAPK cascade
GO:0002252	immune effector process
GO:0002376	immune system process
GO:0002520	immune system development
GO:0002682	regulation of immune system process
GO:0006139	nucleobase-containing compound metabolic process
GO:0006259	DNA metabolic process
GO:0006325	chromatin organization
GO:0006357	regulation of transcription by RNA polymerase II
GO:0006366	transcription by RNA polymerase II
GO:0006468	protein phosphorylation
GO:0006518	peptide metabolic process
GO:0006725	cellular aromatic compound metabolic process
GO:0006793	phosphorus metabolic process
GO:0006807	nitrogen compound metabolic process
GO:0006915	apoptotic process
GO:0006950	response to stress
GO:0006996	organelle organization
GO:0007041	lysosomal transport
GO:0007049	cell cycle
GO:0007166	cell surface receptor signaling pathway
GO:0007275	multicellular organism development
GO:0008152	metabolic process
GO:0008219	cell death
GO:0009056	catabolic process
GO:0009057	macromolecule catabolic process
GO:0009058	biosynthetic process
GO:0009059	macromolecule biosynthetic process
GO:0009966	regulation of signal transduction
GO:0009987	cellular process
GO:0010467	gene expression
GO:0010604	positive regulation of macromolecule metabolic process
GO:0010638	positive regulation of organelle organization
GO:0010646	regulation of cell communication
GO:0010941	regulation of cell death
GO:0016070	RNA metabolic process
GO:0016197	endosomal transport
GO:0016310	phosphorylation
GO:0016567	protein ubiquitination
GO:0016570	histone modification
GO:0018130	heterocycle biosynthetic process
GO:0018193	peptidyl-amino acid modification
GO:0019222	regulation of metabolic process
GO:0019438	aromatic compound biosynthetic process
GO:0019538	protein metabolic process
GO:0022607	cellular component assembly
GO:0023051	regulation of signaling
GO:0030030	cell projection organization
GO:0030097	hemopoiesis
GO:0031323	regulation of cellular metabolic process
GO:0031399	regulation of protein modification process
GO:0031400	negative regulation of protein modification process
GO:0032502	developmental process
GO:0033554	cellular response to stress
GO:0034641	cellular nitrogen compound metabolic process
GO:0034645	cellular macromolecule biosynthetic process
GO:0034654	nucleobase-containing compound biosynthetic process
GO:0035239	tube morphogenesis
GO:0035556	intracellular signal transduction
GO:0036211	protein modification process
GO:0042127	regulation of cell population proliferation
GO:0042325	regulation of phosphorylation
GO:0042981	regulation of apoptotic process
GO:0043170	macromolecule metabolic process
GO:0043412	macromolecule modification
GO:0043603	amide metabolic process
GO:0043933	protein-containing complex organization
GO:0044085	cellular component biogenesis
GO:0044087	regulation of cellular component biogenesis
GO:0044237	cellular metabolic process
GO:0044238	primary metabolic process
GO:0044249	cellular biosynthetic process
GO:0044260	cellular macromolecule metabolic process
GO:0044265	cellular macromolecule catabolic process
GO:0044271	cellular nitrogen compound biosynthetic process
GO:0045653	negative regulation of megakaryocyte differentiation
GO:0045664	regulation of neuron differentiation
GO:0046483	heterocycle metabolic process
GO:0046777	protein autophosphorylation
GO:0046854	phosphatidylinositol phosphate biosynthetic process
GO:0048518	positive regulation of biological process
GO:0048519	negative regulation of biological process
GO:0048523	negative regulation of cellular process
GO:0048534	hematopoietic or lymphoid organ development
GO:0048583	regulation of response to stimulus
GO:0050793	regulation of developmental process
GO:0051128	regulation of cellular component organization
GO:0051174	regulation of phosphorus metabolic process
GO:0051239	regulation of multicellular organismal process
GO:0051246	regulation of protein metabolic process
GO:0051276	chromosome organization
GO:0051338	regulation of transferase activity
GO:0051641	cellular localization
GO:0060011	Sertoli cell proliferation
GO:0065009	regulation of molecular function
GO:0070486	leukocyte aggregation
GO:0070647	protein modification by small protein conjugation or removal
GO:0071310	cellular response to organic substance
GO:0071704	organic substance metabolic process
GO:0071840	cellular component organization or biogenesis
GO:0090304	nucleic acid metabolic process
GO:0120036	plasma membrane bounded cell projection organization
GO:1901360	organic cyclic compound metabolic process
GO:1901362	organic cyclic compound biosynthetic process
GO:1901564	organonitrogen compound metabolic process
GO:1901566	organonitrogen compound biosynthetic process
GO:1901576	organic substance biosynthetic process
GO:1901700	response to oxygen-containing compound
GO:1904707	positive regulation of vascular associated smooth muscle cell proliferation
GO:1990874	vascular associated smooth muscle cell proliferation
GO:2000026	regulation of multicellular organismal development
GO:2000112	regulation of cellular macromolecule biosynthetic process
GO:0000122	negative regulation of transcription by RNA polymerase II
GO:0001816	cytokine production
GO:0001817	regulation of cytokine production
GO:0001959	regulation of cytokine-mediated signaling pathway
GO:0002376	immune system process
GO:0002521	leukocyte differentiation
GO:0002682	regulation of immune system process
GO:0002683	negative regulation of immune system process
GO:0006139	nucleobase-containing compound metabolic process
GO:0006351	DNA-templated transcription
GO:0006357	regulation of transcription by RNA polymerase II
GO:0006366	transcription by RNA polymerase II
GO:0006518	peptide metabolic process
GO:0006725	cellular aromatic compound metabolic process
GO:0006807	nitrogen compound metabolic process
GO:0006915	apoptotic process
GO:0006950	response to stress
GO:0006952	defense response
GO:0007249	I-kappaB kinase/NF-kappaB signaling
GO:0007275	multicellular organism development
GO:0008152	metabolic process
GO:0008219	cell death
GO:0009058	biosynthetic process
GO:0009059	macromolecule biosynthetic process
GO:0009615	response to virus
GO:0009892	negative regulation of metabolic process
GO:0009987	cellular process
GO:0010467	gene expression
GO:0010646	regulation of cell communication
GO:0016043	cellular component organization
GO:0016070	RNA metabolic process
GO:0016310	phosphorylation
GO:0018130	heterocycle biosynthetic process
GO:0019222	regulation of metabolic process
GO:0019438	aromatic compound biosynthetic process
GO:0019538	protein metabolic process
GO:0022613	ribonucleoprotein complex biogenesis
GO:0023051	regulation of signaling
GO:0031323	regulation of cellular metabolic process
GO:0032502	developmental process
GO:0032602	chemokine production
GO:0032635	interleukin-6 production
GO:0032675	regulation of interleukin-6 production
GO:0034641	cellular nitrogen compound metabolic process
GO:0034645	cellular macromolecule biosynthetic process
GO:0035556	intracellular signal transduction
GO:0036211	protein modification process
GO:0042325	regulation of phosphorylation
GO:0042981	regulation of apoptotic process
GO:0043170	macromolecule metabolic process
GO:0043412	macromolecule modification
GO:0043603	amide metabolic process
GO:0044237	cellular metabolic process
GO:0044238	primary metabolic process
GO:0044249	cellular biosynthetic process
GO:0044260	cellular macromolecule metabolic process
GO:0044271	cellular nitrogen compound biosynthetic process
GO:0046136	positive regulation of vitamin metabolic process
GO:0046483	heterocycle metabolic process
GO:0048518	positive regulation of biological process
GO:0048519	negative regulation of biological process
GO:0048522	positive regulation of cellular process
GO:0048534	hematopoietic or lymphoid organ development
GO:0048583	regulation of response to stimulus
GO:0051052	regulation of DNA metabolic process
GO:0051246	regulation of protein metabolic process
GO:0060558	regulation of calcidiol 1-monooxygenase activity
GO:0060759	regulation of response to cytokine stimulus
GO:0071345	cellular response to cytokine stimulus
GO:0071704	organic substance metabolic process
GO:0071840	cellular component organization or biogenesis
GO:0080134	regulation of response to stress
GO:0090304	nucleic acid metabolic process
GO:1901360	organic cyclic compound metabolic process
GO:1901362	organic cyclic compound biosynthetic process
GO:1901564	organonitrogen compound metabolic process
GO:1901576	organic substance biosynthetic process
GO:2000112	regulation of cellular macromolecule biosynthetic process
GO:0006139	nucleobase-containing compound metabolic process
GO:0006325	chromatin organization
GO:0006357	regulation of transcription by RNA polymerase II
GO:0006366	transcription by RNA polymerase II
GO:0006397	mRNA processing
GO:0006479	protein methylation
GO:0006725	cellular aromatic compound metabolic process
GO:0006793	phosphorus metabolic process
GO:0006796	phosphate-containing compound metabolic process
GO:0006807	nitrogen compound metabolic process
GO:0006950	response to stress
GO:0006996	organelle organization
GO:0008152	metabolic process
GO:0008213	protein alkylation
GO:0009058	biosynthetic process
GO:0009059	macromolecule biosynthetic process
GO:0009123	nucleoside monophosphate metabolic process
GO:0009892	negative regulation of metabolic process
GO:0009987	cellular process
GO:0010467	gene expression
GO:0016070	RNA metabolic process
GO:0016071	mRNA metabolic process
GO:0016570	histone modification
GO:0018130	heterocycle biosynthetic process
GO:0018193	peptidyl-amino acid modification
GO:0018205	peptidyl-lysine modification
GO:0019222	regulation of metabolic process
GO:0019438	aromatic compound biosynthetic process
GO:0019538	protein metabolic process
GO:0030521	androgen receptor signaling pathway
GO:0031323	regulation of cellular metabolic process
GO:0031399	regulation of protein modification process
GO:0031400	negative regulation of protein modification process
GO:0032259	methylation
GO:0032446	protein modification by small protein conjugation
GO:0033044	regulation of chromosome organization
GO:0033365	protein localization to organelle
GO:0033554	cellular response to stress
GO:0033993	response to lipid
GO:0034641	cellular nitrogen compound metabolic process
GO:0034645	cellular macromolecule biosynthetic process
GO:0034654	nucleobase-containing compound biosynthetic process
GO:0036211	protein modification process
GO:0043170	macromolecule metabolic process
GO:0043412	macromolecule modification
GO:0043414	macromolecule methylation
GO:0043933	protein-containing complex organization
GO:0044237	cellular metabolic process
GO:0044238	primary metabolic process
GO:0044249	cellular biosynthetic process
GO:0044260	cellular macromolecule metabolic process
GO:0044271	cellular nitrogen compound biosynthetic process
GO:0045936	negative regulation of phosphate metabolic process
GO:0046483	heterocycle metabolic process
GO:0048518	positive regulation of biological process
GO:0048519	negative regulation of biological process
GO:0048522	positive regulation of cellular process
GO:0048583	regulation of response to stimulus
GO:0051128	regulation of cellular component organization
GO:0051174	regulation of phosphorus metabolic process
GO:0051246	regulation of protein metabolic process
GO:0051276	chromosome organization
GO:0051338	regulation of transferase activity
GO:0060334	regulation of type II interferon-mediated signaling pathway
GO:0065003	protein-containing complex assembly
GO:0065009	regulation of molecular function
GO:0070647	protein modification by small protein conjugation or removal
GO:0070887	cellular response to chemical stimulus
GO:0071704	organic substance metabolic process
GO:0071840	cellular component organization or biogenesis
GO:0080134	regulation of response to stress
GO:0090304	nucleic acid metabolic process
GO:1901360	organic cyclic compound metabolic process
GO:1901362	organic cyclic compound biosynthetic process
GO:1901564	organonitrogen compound metabolic process
GO:1901566	organonitrogen compound biosynthetic process
GO:1901576	organic substance biosynthetic process
GO:2000112	regulation of cellular macromolecule biosynthetic process
GO:0006518	peptide metabolic process
GO:0034641	cellular nitrogen compound metabolic process
GO:0043603	amide metabolic process
GO:1901566	organonitrogen compound biosynthetic process
GO:0000165	MAPK cascade
GO:0000278	mitotic cell cycle
GO:0001503	ossification
GO:0001649	osteoblast differentiation
GO:0001660	fever generation
GO:0001775	cell activation
GO:0001816	cytokine production
GO:0001932	regulation of protein phosphorylation
GO:0002376	immune system process
GO:0002520	immune system development
GO:0002682	regulation of immune system process
GO:0002687	positive regulation of leukocyte migration
GO:0006139	nucleobase-containing compound metabolic process
GO:0006325	chromatin organization
GO:0006357	regulation of transcription by RNA polymerase II
GO:0006366	transcription by RNA polymerase II
GO:0006412	translation
GO:0006468	protein phosphorylation
GO:0006725	cellular aromatic compound metabolic process
GO:0006793	phosphorus metabolic process
GO:0006796	phosphate-containing compound metabolic process
GO:0006807	nitrogen compound metabolic process
GO:0006915	apoptotic process
GO:0006950	response to stress
GO:0006979	response to oxidative stress
GO:0006996	organelle organization
GO:0007041	lysosomal transport
GO:0007049	cell cycle
GO:0007166	cell surface receptor signaling pathway
GO:0008152	metabolic process
GO:0008219	cell death
GO:0008283	cell population proliferation
GO:0009056	catabolic process
GO:0009057	macromolecule catabolic process
GO:0009058	biosynthetic process
GO:0009059	macromolecule biosynthetic process
GO:0009605	response to external stimulus
GO:0009607	response to biotic stimulus
GO:0009628	response to abiotic stimulus
GO:0009790	embryo development
GO:0009894	regulation of catabolic process
GO:0009966	regulation of signal transduction
GO:0009987	cellular process
GO:0010467	gene expression
GO:0010469	regulation of signaling receptor activity
GO:0010586	miRNA metabolic process
GO:0010606	positive regulation of cytoplasmic mRNA processing body assembly
GO:0010608	post-transcriptional regulation of gene expression
GO:0010646	regulation of cell communication
GO:0010941	regulation of cell death
GO:0010942	positive regulation of cell death
GO:0015833	peptide transport
GO:0016032	viral process
GO:0016049	cell growth
GO:0016070	RNA metabolic process
GO:0016071	mRNA metabolic process
GO:0016567	protein ubiquitination
GO:0016570	histone modification
GO:0018130	heterocycle biosynthetic process
GO:0019222	regulation of metabolic process
GO:0019438	aromatic compound biosynthetic process
GO:0019538	protein metabolic process
GO:0022407	regulation of cell-cell adhesion
GO:0023051	regulation of signaling
GO:0030097	hemopoiesis
GO:0031323	regulation of cellular metabolic process
GO:0031399	regulation of protein modification process
GO:0031622	positive regulation of fever generation
GO:0031650	regulation of heat generation
GO:0032496	response to lipopolysaccharide
GO:0032502	developmental process
GO:0032633	interleukin-4 production
GO:0032673	regulation of interleukin-4 production
GO:0032713	negative regulation of interleukin-4 production
GO:0032879	regulation of localization
GO:0033036	macromolecule localization
GO:0033043	regulation of organelle organization
GO:0033554	cellular response to stress
GO:0033962	P-body assembly
GO:0034113	heterotypic cell-cell adhesion
GO:0034248	regulation of amide metabolic process
GO:0034641	cellular nitrogen compound metabolic process
GO:0034645	cellular macromolecule biosynthetic process
GO:0034654	nucleobase-containing compound biosynthetic process
GO:0035556	intracellular signal transduction
GO:0036211	protein modification process
GO:0036293	response to decreased oxygen levels
GO:0040007	growth
GO:0040008	regulation of growth
GO:0040011	locomotion
GO:0042592	homeostatic process
GO:0042886	amide transport
GO:0043112	receptor metabolic process
GO:0043170	macromolecule metabolic process
GO:0043412	macromolecule modification
GO:0043603	amide metabolic process
GO:0043903	regulation of biological process involved in symbiotic interaction
GO:0044237	cellular metabolic process
GO:0044238	primary metabolic process
GO:0044249	cellular biosynthetic process
GO:0044260	cellular macromolecule metabolic process
GO:0044265	cellular macromolecule catabolic process
GO:0044271	cellular nitrogen compound biosynthetic process
GO:0044419	biological process involved in interspecies interaction between organisms
GO:0045071	negative regulation of viral genome replication
GO:0045595	regulation of cell differentiation
GO:0045661	regulation of myoblast differentiation
GO:0045672	positive regulation of osteoclast differentiation
GO:0046483	heterocycle metabolic process
GO:0048513	animal organ development
GO:0048518	positive regulation of biological process
GO:0048519	negative regulation of biological process
GO:0048522	positive regulation of cellular process
GO:0048523	negative regulation of cellular process
GO:0048534	hematopoietic or lymphoid organ development
GO:0048583	regulation of response to stimulus
GO:0048870	cell motility
GO:0050792	regulation of viral process
GO:0050793	regulation of developmental process
GO:0050794	regulation of cellular process
GO:0050900	leukocyte migration
GO:0051093	negative regulation of developmental process
GO:0051128	regulation of cellular component organization
GO:0051174	regulation of phosphorus metabolic process
GO:0051179	localization
GO:0051239	regulation of multicellular organismal process
GO:0051246	regulation of protein metabolic process
GO:0051276	chromosome organization
GO:0051641	cellular localization
GO:0051649	establishment of localization in cell
GO:0051674	localization of cell
GO:0051726	regulation of cell cycle
GO:0052472	modulation by host of symbiont transcription
GO:0061614	miRNA transcription
GO:0065007	biological regulation
GO:0065008	regulation of biological quality
GO:0065009	regulation of molecular function
GO:0070098	chemokine-mediated signaling pathway
GO:0070482	response to oxygen levels
GO:0070647	protein modification by small protein conjugation or removal
GO:0070887	cellular response to chemical stimulus
GO:0071466	cellular response to xenobiotic stimulus
GO:0071704	organic substance metabolic process
GO:0071705	nitrogen compound transport
GO:0071840	cellular component organization or biogenesis
GO:0072594	establishment of protein localization to organelle
GO:0090304	nucleic acid metabolic process
GO:0090503	RNA phosphodiester bond hydrolysis, exonucleolytic
GO:1901031	regulation of response to reactive oxygen species
GO:1901360	organic cyclic compound metabolic process
GO:1901362	organic cyclic compound biosynthetic process
GO:1901564	organonitrogen compound metabolic process
GO:1901566	organonitrogen compound biosynthetic process
GO:1901576	organic substance biosynthetic process
GO:1901698	response to nitrogen compound
GO:1902882	regulation of response to oxidative stress
GO:1903311	regulation of mRNA metabolic process
GO:1904761	negative regulation of myofibroblast differentiation
GO:1990090	cellular response to nerve growth factor stimulus
GO:2000112	regulation of cellular macromolecule biosynthetic process
GO:0006518	peptide metabolic process
GO:0010467	gene expression
GO:0019827	stem cell population maintenance
GO:0034641	cellular nitrogen compound metabolic process
GO:0090169	regulation of spindle assembly
GO:0098727	maintenance of cell number

## Sheet: Uniqe terms
GO:0000165	MAPK cascade
GO:0001660	fever generation
GO:0001775	cell activation
GO:0001816	cytokine production
GO:0002376	immune system process
GO:0002520	immune system development
GO:0002521	leukocyte differentiation
GO:0002682	regulation of immune system process
GO:0002684	positive regulation of immune system process
GO:0002825	regulation of T-helper 1 type immune response
GO:0003018	vascular process in circulatory system
GO:0006351	DNA-templated transcription
GO:0006357	regulation of transcription by RNA polymerase II
GO:0006366	transcription by RNA polymerase II
GO:0006468	protein phosphorylation
GO:0006950	response to stress
GO:0006954	inflammatory response
GO:0006979	response to oxidative stress
GO:0007155	cell adhesion
GO:0007162	negative regulation of cell adhesion
GO:0007166	cell surface receptor signaling pathway
GO:0007249	I-kappaB kinase/NF-kappaB signaling
GO:0008219	cell death
GO:0008283	cell population proliferation
GO:0009058	biosynthetic process
GO:0009059	macromolecule biosynthetic process
GO:0009410	response to xenobiotic stimulus
GO:0009605	response to external stimulus
GO:0009607	response to biotic stimulus
GO:0010035	response to inorganic substance
GO:0010646	regulation of cell communication
GO:0010941	regulation of cell death
GO:0016310	phosphorylation
GO:0018130	heterocycle biosynthetic process
GO:0019222	regulation of metabolic process
GO:0019438	aromatic compound biosynthetic process
GO:0023051	regulation of signaling
GO:0030155	regulation of cell adhesion
GO:0030335	positive regulation of cell migration
GO:0031326	regulation of cellular biosynthetic process
GO:0031399	regulation of protein modification process
GO:0032101	regulation of response to external stimulus
GO:0032103	positive regulation of response to external stimulus
GO:0032502	developmental process
GO:0032879	regulation of localization
GO:0033002	muscle cell proliferation
GO:0033554	cellular response to stress
GO:0034103	regulation of tissue remodeling
GO:0034641	cellular nitrogen compound metabolic process
GO:0034645	cellular macromolecule biosynthetic process
GO:0035556	intracellular signal transduction
GO:0038034	signal transduction in absence of ligand
GO:0038066	p38MAPK cascade
GO:0040012	regulation of locomotion
GO:0042088	T-helper 1 type immune response
GO:0042127	regulation of cell population proliferation
GO:0042221	response to chemical
GO:0043065	positive regulation of apoptotic process
GO:0043154	negative regulation of cysteine-type endopeptidase activity involved in apoptotic process
GO:0043408	regulation of MAPK cascade
GO:0044249	cellular biosynthetic process
GO:0044271	cellular nitrogen compound biosynthetic process
GO:0048513	animal organ development
GO:0048518	positive regulation of biological process
GO:0048519	negative regulation of biological process
GO:0048523	negative regulation of cellular process
GO:0048534	hematopoietic or lymphoid organ development
GO:0048583	regulation of response to stimulus
GO:0048646	anatomical structure formation involved in morphogenesis
GO:0048659	smooth muscle cell proliferation
GO:0048660	regulation of smooth muscle cell proliferation
GO:0048661	positive regulation of smooth muscle cell proliferation
GO:0048771	tissue remodeling
GO:0050789	regulation of biological process
GO:0050790	regulation of catalytic activity
GO:0050793	regulation of developmental process
GO:0050896	response to stimulus
GO:0051093	negative regulation of developmental process
GO:0051094	positive regulation of developmental process
GO:0051174	regulation of phosphorus metabolic process
GO:0051239	regulation of multicellular organismal process
GO:0051240	positive regulation of multicellular organismal process
GO:0051246	regulation of protein metabolic process
GO:0051707	response to other organism
GO:0051716	cellular response to stimulus
GO:0065007	biological regulation
GO:0065009	regulation of molecular function
GO:0070887	cellular response to chemical stimulus
GO:0071456	cellular response to hypoxia
GO:0080135	regulation of cellular response to stress
GO:0090304	nucleic acid metabolic process
GO:0097191	extrinsic apoptotic signaling pathway
GO:0097530	granulocyte migration
GO:1900745	positive regulation of p38MAPK cascade
GO:1901576	organic substance biosynthetic process
GO:1901698	response to nitrogen compound
GO:1905952	regulation of lipid localization
GO:1905954	positive regulation of lipid localization
GO:2000112	regulation of cellular macromolecule biosynthetic process
GO:0001501	skeletal system development
GO:0001503	ossification
GO:0001568	blood vessel development
GO:0001763	morphogenesis of a branching structure
GO:0001817	regulation of cytokine production
GO:0001932	regulation of protein phosphorylation
GO:0001957	intramembranous ossification
GO:0002237	response to molecule of bacterial origin
GO:0003158	endothelium development
GO:0006139	nucleobase-containing compound metabolic process
GO:0006325	chromatin organization
GO:0006725	cellular aromatic compound metabolic process
GO:0006793	phosphorus metabolic process
GO:0006807	nitrogen compound metabolic process
GO:0006809	nitric oxide biosynthetic process
GO:0006810	transport
GO:0006915	apoptotic process
GO:0006952	defense response
GO:0006996	organelle organization
GO:0007159	leukocyte cell-cell adhesion
GO:0007167	enzyme-linked receptor protein signaling pathway
GO:0008104	protein localization
GO:0008152	metabolic process
GO:0008285	negative regulation of cell population proliferation
GO:0009056	catabolic process
GO:0009611	response to wounding
GO:0009628	response to abiotic stimulus
GO:0009719	response to endogenous stimulus
GO:0009966	regulation of signal transduction
GO:0009987	cellular process
GO:0009991	response to extracellular stimulus
GO:0010467	gene expression
GO:0010638	positive regulation of organelle organization
GO:0015833	peptide transport
GO:0016032	viral process
GO:0016070	RNA metabolic process
GO:0016477	cell migration
GO:0016567	protein ubiquitination
GO:0016570	histone modification
GO:0018193	peptidyl-amino acid modification
GO:0019079	viral genome replication
GO:0019538	protein metabolic process
GO:0022407	regulation of cell-cell adhesion
GO:0022607	cellular component assembly
GO:0022612	gland morphogenesis
GO:0030097	hemopoiesis
GO:0030198	extracellular matrix organization
GO:0030278	regulation of ossification
GO:0030334	regulation of cell migration
GO:0030522	intracellular receptor signaling pathway
GO:0031323	regulation of cellular metabolic process
GO:0031650	regulation of heat generation
GO:0031667	response to nutrient levels
GO:0032501	multicellular organismal process
GO:0032963	collagen metabolic process
GO:0033036	macromolecule localization
GO:0034968	histone lysine methylation
GO:0035239	tube morphogenesis
GO:0035455	response to interferon-alpha
GO:0035456	response to interferon-beta
GO:0035457	cellular response to interferon-alpha
GO:0035458	cellular response to interferon-beta
GO:0036072	direct ossification
GO:0036211	protein modification process
GO:0036293	response to decreased oxygen levels
GO:0040007	growth
GO:0040011	locomotion
GO:0042060	wound healing
GO:0042136	neurotransmitter biosynthetic process
GO:0042592	homeostatic process
GO:0042886	amide transport
GO:0042981	regulation of apoptotic process
GO:0043009	chordate embryonic development
GO:0043062	extracellular structure organization
GO:0043170	macromolecule metabolic process
GO:0043277	apoptotic cell clearance
GO:0043412	macromolecule modification
GO:0043491	protein kinase B signaling
GO:0043618	regulation of transcription from RNA polymerase II promoter in response to stress
GO:0043620	regulation of DNA-templated transcription in response to stress
GO:0043903	regulation of biological process involved in symbiotic interaction
GO:0043933	protein-containing complex organization
GO:0044085	cellular component biogenesis
GO:0044237	cellular metabolic process
GO:0044238	primary metabolic process
GO:0044248	cellular catabolic process
GO:0044260	cellular macromolecule metabolic process
GO:0044403	biological process involved in symbiotic interaction
GO:0044419	biological process involved in interspecies interaction between organisms
GO:0044706	multi-multicellular organism process
GO:0045071	negative regulation of viral genome replication
GO:0045087	innate immune response
GO:0045428	regulation of nitric oxide biosynthetic process
GO:0045444	fat cell differentiation
GO:0045595	regulation of cell differentiation
GO:0045861	negative regulation of proteolysis
GO:0046483	heterocycle metabolic process
GO:0046903	secretion
GO:0048522	positive regulation of cellular process
GO:0048589	developmental growth
GO:0048732	gland development
GO:0048856	anatomical structure development
GO:0048870	cell motility
GO:0048872	homeostasis of number of cells
GO:0050792	regulation of viral process
GO:0050794	regulation of cellular process
GO:0051049	regulation of transport
GO:0051128	regulation of cellular component organization
GO:0051146	striated muscle cell differentiation
GO:0051179	localization
GO:0051276	chromosome organization
GO:0051641	cellular localization
GO:0051674	localization of cell
GO:0051726	regulation of cell cycle
GO:0051896	regulation of protein kinase B signaling
GO:0051897	positive regulation of protein kinase B signaling
GO:0055123	digestive system development
GO:0060343	trabecula formation
GO:0060759	regulation of response to cytokine stimulus
GO:0060760	positive regulation of response to cytokine stimulus
GO:0061383	trabecula morphogenesis
GO:0065008	regulation of biological quality
GO:0070371	ERK1 and ERK2 cascade
GO:0070482	response to oxygen levels
GO:0070647	protein modification by small protein conjugation or removal
GO:0071230	cellular response to amino acid stimulus
GO:0071363	cellular response to growth factor stimulus
GO:0071466	cellular response to xenobiotic stimulus
GO:0071604	transforming growth factor beta production
GO:0071702	organic substance transport
GO:0071704	organic substance metabolic process
GO:0071705	nitrogen compound transport
GO:0071840	cellular component organization or biogenesis
GO:0072593	reactive oxygen species metabolic process
GO:0098609	cell-cell adhesion
GO:1901360	organic cyclic compound metabolic process
GO:1901362	organic cyclic compound biosynthetic process
GO:1901564	organonitrogen compound metabolic process
GO:1903409	reactive oxygen species biosynthetic process
GO:1903426	regulation of reactive oxygen species biosynthetic process
GO:2000108	positive regulation of leukocyte apoptotic process
GO:2000377	regulation of reactive oxygen species metabolic process
GO:2001057	reactive nitrogen species metabolic process
GO:0001558	regulation of cell growth
GO:0001961	positive regulation of cytokine-mediated signaling pathway
GO:0002285	lymphocyte activation involved in immune response
GO:0006259	DNA metabolic process
GO:0006260	DNA replication
GO:0006396	RNA processing
GO:0006397	mRNA processing
GO:0006984	ER-nucleus signaling pathway
GO:0006986	response to unfolded protein
GO:0008380	RNA splicing
GO:0009057	macromolecule catabolic process
GO:0010604	positive regulation of macromolecule metabolic process
GO:0010605	negative regulation of macromolecule metabolic process
GO:0016049	cell growth
GO:0016071	mRNA metabolic process
GO:0022613	ribonucleoprotein complex biogenesis
GO:0032446	protein modification by small protein conjugation
GO:0034097	response to cytokine
GO:0034340	response to type I interferon
GO:0034654	nucleobase-containing compound biosynthetic process
GO:0040008	regulation of growth
GO:0044265	cellular macromolecule catabolic process
GO:0046834	lipid phosphorylation
GO:0046854	phosphatidylinositol phosphate biosynthetic process
GO:0046907	intracellular transport
GO:0048525	negative regulation of viral process
GO:0051171	regulation of nitrogen compound metabolic process
GO:0060337	type I interferon-mediated signaling pathway
GO:0070988	demethylation
GO:0071216	cellular response to biotic stimulus
GO:0071396	cellular response to lipid
GO:0071557	histone H3-K27 demethylation
GO:0071706	tumor necrosis factor superfamily cytokine production
GO:0080134	regulation of response to stress
GO:1901701	cellular response to oxygen-containing compound
GO:1902532	negative regulation of intracellular signal transduction
GO:1903555	regulation of tumor necrosis factor superfamily cytokine production
GO:0019219	regulation of nucleobase-containing compound metabolic process
GO:0002252	immune effector process
GO:0006518	peptide metabolic process
GO:0007041	lysosomal transport
GO:0007049	cell cycle
GO:0007275	multicellular organism development
GO:0016197	endosomal transport
GO:0030030	cell projection organization
GO:0031400	negative regulation of protein modification process
GO:0042325	regulation of phosphorylation
GO:0043603	amide metabolic process
GO:0044087	regulation of cellular component biogenesis
GO:0045653	negative regulation of megakaryocyte differentiation
GO:0045664	regulation of neuron differentiation
GO:0046777	protein autophosphorylation
GO:0051338	regulation of transferase activity
GO:0060011	Sertoli cell proliferation
GO:0070486	leukocyte aggregation
GO:0071310	cellular response to organic substance
GO:0120036	plasma membrane bounded cell projection organization
GO:1901566	organonitrogen compound biosynthetic process
GO:1901700	response to oxygen-containing compound
GO:1904707	positive regulation of vascular associated smooth muscle cell proliferation
GO:1990874	vascular associated smooth muscle cell proliferation
GO:2000026	regulation of multicellular organismal development
GO:0000122	negative regulation of transcription by RNA polymerase II
GO:0001959	regulation of cytokine-mediated signaling pathway
GO:0002683	negative regulation of immune system process
GO:0009615	response to virus
GO:0009892	negative regulation of metabolic process
GO:0016043	cellular component organization
GO:0032602	chemokine production
GO:0032635	interleukin-6 production
GO:0032675	regulation of interleukin-6 production
GO:0046136	positive regulation of vitamin metabolic process
GO:0051052	regulation of DNA metabolic process
GO:0060558	regulation of calcidiol 1-monooxygenase activity
GO:0071345	cellular response to cytokine stimulus
GO:0006479	protein methylation
GO:0006796	phosphate-containing compound metabolic process
GO:0008213	protein alkylation
GO:0009123	nucleoside monophosphate metabolic process
GO:0018205	peptidyl-lysine modification
GO:0030521	androgen receptor signaling pathway
GO:0032259	methylation
GO:0033044	regulation of chromosome organization
GO:0033365	protein localization to organelle
GO:0033993	response to lipid
GO:0043414	macromolecule methylation
GO:0045936	negative regulation of phosphate metabolic process
GO:0060334	regulation of type II interferon-mediated signaling pathway
GO:0065003	protein-containing complex assembly
GO:0000278	mitotic cell cycle
GO:0001649	osteoblast differentiation
GO:0002687	positive regulation of leukocyte migration
GO:0006412	translation
GO:0009790	embryo development
GO:0009894	regulation of catabolic process
GO:0010469	regulation of signaling receptor activity
GO:0010586	miRNA metabolic process
GO:0010606	positive regulation of cytoplasmic mRNA processing body assembly
GO:0010608	post-transcriptional regulation of gene expression
GO:0010942	positive regulation of cell death
GO:0031622	positive regulation of fever generation
GO:0032496	response to lipopolysaccharide
GO:0032633	interleukin-4 production
GO:0032673	regulation of interleukin-4 production
GO:0032713	negative regulation of interleukin-4 production
GO:0033043	regulation of organelle organization
GO:0033962	P-body assembly
GO:0034113	heterotypic cell-cell adhesion
GO:0034248	regulation of amide metabolic process
GO:0043112	receptor metabolic process
GO:0045661	regulation of myoblast differentiation
GO:0045672	positive regulation of osteoclast differentiation
GO:0050900	leukocyte migration
GO:0051649	establishment of localization in cell
GO:0052472	modulation by host of symbiont transcription
GO:0061614	miRNA transcription
GO:0070098	chemokine-mediated signaling pathway
GO:0072594	establishment of protein localization to organelle
GO:0090503	RNA phosphodiester bond hydrolysis, exonucleolytic
GO:1901031	regulation of response to reactive oxygen species
GO:1902882	regulation of response to oxidative stress
GO:1903311	regulation of mRNA metabolic process
GO:1904761	negative regulation of myofibroblast differentiation
GO:1990090	cellular response to nerve growth factor stimulus
GO:0019827	stem cell population maintenance
GO:0090169	regulation of spindle assembly
GO:0098727	maintenance of cell number

## Sheet: Terms by cluster
Neutrophils		Macrophages		Dendritic		NK cells		ILC1		NKT cells		CD8 T cells		CD4 T cells		DNT cells		B cells		ILC2		ILC3
GO:0000165	MAPK cascade	GO:0000165	MAPK cascade	GO:0001558	regulation of cell growth	GO:0006139	nucleobase-containing compound metabolic process	GO:0000165	MAPK cascade	GO:0000122	negative regulation of transcription by RNA polymerase II	GO:0006139	nucleobase-containing compound metabolic process	GO:0006518	peptide metabolic process	GO:0000165	MAPK cascade	GO:0006518	peptide metabolic process	GO:0010467	gene expression
GO:0001660	fever generation	GO:0001501	skeletal system development	GO:0001816	cytokine production	GO:0006725	cellular aromatic compound metabolic process	GO:0002252	immune effector process	GO:0001816	cytokine production	GO:0006325	chromatin organization	GO:0034641	cellular nitrogen compound metabolic process	GO:0000278	mitotic cell cycle			GO:0019827	stem cell population maintenance
GO:0001775	cell activation	GO:0001503	ossification	GO:0001817	regulation of cytokine production	GO:0006807	nitrogen compound metabolic process	GO:0002376	immune system process	GO:0001817	regulation of cytokine production	GO:0006357	regulation of transcription by RNA polymerase II	GO:0043603	amide metabolic process	GO:0001503	ossification			GO:0034641	cellular nitrogen compound metabolic process
GO:0001816	cytokine production	GO:0001568	blood vessel development	GO:0001961	positive regulation of cytokine-mediated signaling pathway	GO:0006915	apoptotic process	GO:0002520	immune system development	GO:0001959	regulation of cytokine-mediated signaling pathway	GO:0006366	transcription by RNA polymerase II	GO:1901566	organonitrogen compound biosynthetic process	GO:0001649	osteoblast differentiation			GO:0090169	regulation of spindle assembly
GO:0002376	immune system process	GO:0001763	morphogenesis of a branching structure	GO:0002237	response to molecule of bacterial origin	GO:0008219	cell death	GO:0002682	regulation of immune system process	GO:0002376	immune system process	GO:0006397	mRNA processing			GO:0001660	fever generation			GO:0098727	maintenance of cell number
GO:0002520	immune system development	GO:0001775	cell activation	GO:0002285	lymphocyte activation involved in immune response	GO:0009059	macromolecule biosynthetic process	GO:0006139	nucleobase-containing compound metabolic process	GO:0002521	leukocyte differentiation	GO:0006479	protein methylation			GO:0001775	cell activation
GO:0002521	leukocyte differentiation	GO:0001816	cytokine production	GO:0002376	immune system process	GO:0009966	regulation of signal transduction	GO:0006259	DNA metabolic process	GO:0002682	regulation of immune system process	GO:0006725	cellular aromatic compound metabolic process			GO:0001816	cytokine production
GO:0002682	regulation of immune system process	GO:0001817	regulation of cytokine production	GO:0002520	immune system development	GO:0010467	gene expression	GO:0006325	chromatin organization	GO:0002683	negative regulation of immune system process	GO:0006793	phosphorus metabolic process			GO:0001932	regulation of protein phosphorylation
GO:0002684	positive regulation of immune system process	GO:0001932	regulation of protein phosphorylation	GO:0002682	regulation of immune system process	GO:0010605	negative regulation of macromolecule metabolic process	GO:0006357	regulation of transcription by RNA polymerase II	GO:0006139	nucleobase-containing compound metabolic process	GO:0006796	phosphate-containing compound metabolic process			GO:0002376	immune system process
GO:0002825	regulation of T-helper 1 type immune response	GO:0001957	intramembranous ossification	GO:0006139	nucleobase-containing compound metabolic process	GO:0010941	regulation of cell death	GO:0006366	transcription by RNA polymerase II	GO:0006351	DNA-templated transcription	GO:0006807	nitrogen compound metabolic process			GO:0002520	immune system development
GO:0003018	vascular process in circulatory system	GO:0002237	response to molecule of bacterial origin	GO:0006259	DNA metabolic process	GO:0016070	RNA metabolic process	GO:0006468	protein phosphorylation	GO:0006357	regulation of transcription by RNA polymerase II	GO:0006950	response to stress			GO:0002682	regulation of immune system process
GO:0006351	DNA-templated transcription	GO:0002376	immune system process	GO:0006260	DNA replication	GO:0019219	regulation of nucleobase-containing compound metabolic process	GO:0006518	peptide metabolic process	GO:0006366	transcription by RNA polymerase II	GO:0006996	organelle organization			GO:0002687	positive regulation of leukocyte migration
GO:0006357	regulation of transcription by RNA polymerase II	GO:0002682	regulation of immune system process	GO:0006325	chromatin organization	GO:0019222	regulation of metabolic process	GO:0006725	cellular aromatic compound metabolic process	GO:0006518	peptide metabolic process	GO:0008152	metabolic process			GO:0006139	nucleobase-containing compound metabolic process
GO:0006366	transcription by RNA polymerase II	GO:0003158	endothelium development	GO:0006357	regulation of transcription by RNA polymerase II	GO:0022613	ribonucleoprotein complex biogenesis	GO:0006793	phosphorus metabolic process	GO:0006725	cellular aromatic compound metabolic process	GO:0008213	protein alkylation			GO:0006325	chromatin organization
GO:0006468	protein phosphorylation	GO:0006139	nucleobase-containing compound metabolic process	GO:0006366	transcription by RNA polymerase II	GO:0034641	cellular nitrogen compound metabolic process	GO:0006807	nitrogen compound metabolic process	GO:0006807	nitrogen compound metabolic process	GO:0009058	biosynthetic process			GO:0006357	regulation of transcription by RNA polymerase II
GO:0006950	response to stress	GO:0006325	chromatin organization	GO:0006396	RNA processing	GO:0034645	cellular macromolecule biosynthetic process	GO:0006915	apoptotic process	GO:0006915	apoptotic process	GO:0009059	macromolecule biosynthetic process			GO:0006366	transcription by RNA polymerase II
GO:0006954	inflammatory response	GO:0006351	DNA-templated transcription	GO:0006397	mRNA processing	GO:0042981	regulation of apoptotic process	GO:0006950	response to stress	GO:0006950	response to stress	GO:0009123	nucleoside monophosphate metabolic process			GO:0006412	translation
GO:0006979	response to oxidative stress	GO:0006357	regulation of transcription by RNA polymerase II	GO:0006468	protein phosphorylation	GO:0043170	macromolecule metabolic process	GO:0006996	organelle organization	GO:0006952	defense response	GO:0009892	negative regulation of metabolic process			GO:0006468	protein phosphorylation
GO:0007155	cell adhesion	GO:0006366	transcription by RNA polymerase II	GO:0006725	cellular aromatic compound metabolic process	GO:0044237	cellular metabolic process	GO:0007041	lysosomal transport	GO:0007249	I-kappaB kinase/NF-kappaB signaling	GO:0009987	cellular process			GO:0006725	cellular aromatic compound metabolic process
GO:0007162	negative regulation of cell adhesion	GO:0006468	protein phosphorylation	GO:0006793	phosphorus metabolic process	GO:0044238	primary metabolic process	GO:0007049	cell cycle	GO:0007275	multicellular organism development	GO:0010467	gene expression			GO:0006793	phosphorus metabolic process
GO:0007166	cell surface receptor signaling pathway	GO:0006725	cellular aromatic compound metabolic process	GO:0006807	nitrogen compound metabolic process	GO:0044260	cellular macromolecule metabolic process	GO:0007166	cell surface receptor signaling pathway	GO:0008152	metabolic process	GO:0016070	RNA metabolic process			GO:0006796	phosphate-containing compound metabolic process
GO:0007249	I-kappaB kinase/NF-kappaB signaling	GO:0006793	phosphorus metabolic process	GO:0006915	apoptotic process	GO:0046483	heterocycle metabolic process	GO:0007275	multicellular organism development	GO:0008219	cell death	GO:0016071	mRNA metabolic process			GO:0006807	nitrogen compound metabolic process
GO:0008219	cell death	GO:0006807	nitrogen compound metabolic process	GO:0006950	response to stress	GO:0048519	negative regulation of biological process	GO:0008152	metabolic process	GO:0009058	biosynthetic process	GO:0016570	histone modification			GO:0006915	apoptotic process
GO:0008283	cell population proliferation	GO:0006809	nitric oxide biosynthetic process	GO:0006984	ER-nucleus signaling pathway	GO:0071704	organic substance metabolic process	GO:0008219	cell death	GO:0009059	macromolecule biosynthetic process	GO:0018130	heterocycle biosynthetic process			GO:0006950	response to stress
GO:0009058	biosynthetic process	GO:0006810	transport	GO:0006986	response to unfolded protein	GO:0071840	cellular component organization or biogenesis	GO:0009056	catabolic process	GO:0009615	response to virus	GO:0018193	peptidyl-amino acid modification			GO:0006979	response to oxidative stress
GO:0009059	macromolecule biosynthetic process	GO:0006915	apoptotic process	GO:0006996	organelle organization	GO:0090304	nucleic acid metabolic process	GO:0009057	macromolecule catabolic process	GO:0009892	negative regulation of metabolic process	GO:0018205	peptidyl-lysine modification			GO:0006996	organelle organization
GO:0009410	response to xenobiotic stimulus	GO:0006950	response to stress	GO:0007249	I-kappaB kinase/NF-kappaB signaling	GO:1901360	organic cyclic compound metabolic process	GO:0009058	biosynthetic process	GO:0009987	cellular process	GO:0019222	regulation of metabolic process			GO:0007041	lysosomal transport
GO:0009605	response to external stimulus	GO:0006952	defense response	GO:0008152	metabolic process	GO:2000112	regulation of cellular macromolecule biosynthetic process	GO:0009059	macromolecule biosynthetic process	GO:0010467	gene expression	GO:0019438	aromatic compound biosynthetic process			GO:0007049	cell cycle
GO:0009607	response to biotic stimulus	GO:0006954	inflammatory response	GO:0008219	cell death			GO:0009966	regulation of signal transduction	GO:0010646	regulation of cell communication	GO:0019538	protein metabolic process			GO:0007166	cell surface receptor signaling pathway
GO:0010035	response to inorganic substance	GO:0006979	response to oxidative stress	GO:0008380	RNA splicing			GO:0009987	cellular process	GO:0016043	cellular component organization	GO:0030521	androgen receptor signaling pathway			GO:0008152	metabolic process
GO:0010646	regulation of cell communication	GO:0006996	organelle organization	GO:0009056	catabolic process			GO:0010467	gene expression	GO:0016070	RNA metabolic process	GO:0031323	regulation of cellular metabolic process			GO:0008219	cell death
GO:0010941	regulation of cell death	GO:0007155	cell adhesion	GO:0009057	macromolecule catabolic process			GO:0010604	positive regulation of macromolecule metabolic process	GO:0016310	phosphorylation	GO:0031399	regulation of protein modification process			GO:0008283	cell population proliferation
GO:0016310	phosphorylation	GO:0007159	leukocyte cell-cell adhesion	GO:0009058	biosynthetic process			GO:0010638	positive regulation of organelle organization	GO:0018130	heterocycle biosynthetic process	GO:0031400	negative regulation of protein modification process			GO:0009056	catabolic process
GO:0018130	heterocycle biosynthetic process	GO:0007166	cell surface receptor signaling pathway	GO:0009059	macromolecule biosynthetic process			GO:0010646	regulation of cell communication	GO:0019222	regulation of metabolic process	GO:0032259	methylation			GO:0009057	macromolecule catabolic process
GO:0019222	regulation of metabolic process	GO:0007167	enzyme-linked receptor protein signaling pathway	GO:0009410	response to xenobiotic stimulus			GO:0010941	regulation of cell death	GO:0019438	aromatic compound biosynthetic process	GO:0032446	protein modification by small protein conjugation			GO:0009058	biosynthetic process
GO:0019438	aromatic compound biosynthetic process	GO:0008104	protein localization	GO:0009607	response to biotic stimulus			GO:0016070	RNA metabolic process	GO:0019538	protein metabolic process	GO:0033044	regulation of chromosome organization			GO:0009059	macromolecule biosynthetic process
GO:0023051	regulation of signaling	GO:0008152	metabolic process	GO:0009628	response to abiotic stimulus			GO:0016197	endosomal transport	GO:0022613	ribonucleoprotein complex biogenesis	GO:0033365	protein localization to organelle			GO:0009605	response to external stimulus
GO:0030155	regulation of cell adhesion	GO:0008219	cell death	GO:0009987	cellular process			GO:0016310	phosphorylation	GO:0023051	regulation of signaling	GO:0033554	cellular response to stress			GO:0009607	response to biotic stimulus
GO:0030335	positive regulation of cell migration	GO:0008283	cell population proliferation	GO:0010467	gene expression			GO:0016567	protein ubiquitination	GO:0031323	regulation of cellular metabolic process	GO:0033993	response to lipid			GO:0009628	response to abiotic stimulus
GO:0031326	regulation of cellular biosynthetic process	GO:0008285	negative regulation of cell population proliferation	GO:0010604	positive regulation of macromolecule metabolic process			GO:0016570	histone modification	GO:0032502	developmental process	GO:0034641	cellular nitrogen compound metabolic process			GO:0009790	embryo development
GO:0031399	regulation of protein modification process	GO:0009056	catabolic process	GO:0010605	negative regulation of macromolecule metabolic process			GO:0018130	heterocycle biosynthetic process	GO:0032602	chemokine production	GO:0034645	cellular macromolecule biosynthetic process			GO:0009894	regulation of catabolic process
GO:0032101	regulation of response to external stimulus	GO:0009058	biosynthetic process	GO:0010941	regulation of cell death			GO:0018193	peptidyl-amino acid modification	GO:0032635	interleukin-6 production	GO:0034654	nucleobase-containing compound biosynthetic process			GO:0009966	regulation of signal transduction
GO:0032103	positive regulation of response to external stimulus	GO:0009059	macromolecule biosynthetic process	GO:0015833	peptide transport			GO:0019222	regulation of metabolic process	GO:0032675	regulation of interleukin-6 production	GO:0036211	protein modification process			GO:0009987	cellular process
GO:0032502	developmental process	GO:0009410	response to xenobiotic stimulus	GO:0016032	viral process			GO:0019438	aromatic compound biosynthetic process	GO:0034641	cellular nitrogen compound metabolic process	GO:0043170	macromolecule metabolic process			GO:0010467	gene expression
GO:0032879	regulation of localization	GO:0009605	response to external stimulus	GO:0016049	cell growth			GO:0019538	protein metabolic process	GO:0034645	cellular macromolecule biosynthetic process	GO:0043412	macromolecule modification			GO:0010469	regulation of signaling receptor activity
GO:0033002	muscle cell proliferation	GO:0009607	response to biotic stimulus	GO:0016070	RNA metabolic process			GO:0022607	cellular component assembly	GO:0035556	intracellular signal transduction	GO:0043414	macromolecule methylation			GO:0010586	miRNA metabolic process
GO:0033554	cellular response to stress	GO:0009611	response to wounding	GO:0016071	mRNA metabolic process			GO:0023051	regulation of signaling	GO:0036211	protein modification process	GO:0043933	protein-containing complex organization			GO:0010606	positive regulation of cytoplasmic mRNA processing body assembly
GO:0034103	regulation of tissue remodeling	GO:0009628	response to abiotic stimulus	GO:0016310	phosphorylation			GO:0030030	cell projection organization	GO:0042325	regulation of phosphorylation	GO:0044237	cellular metabolic process			GO:0010608	post-transcriptional regulation of gene expression
GO:0034641	cellular nitrogen compound metabolic process	GO:0009719	response to endogenous stimulus	GO:0016570	histone modification			GO:0030097	hemopoiesis	GO:0042981	regulation of apoptotic process	GO:0044238	primary metabolic process			GO:0010646	regulation of cell communication
GO:0034645	cellular macromolecule biosynthetic process	GO:0009966	regulation of signal transduction	GO:0018130	heterocycle biosynthetic process			GO:0031323	regulation of cellular metabolic process	GO:0043170	macromolecule metabolic process	GO:0044249	cellular biosynthetic process			GO:0010941	regulation of cell death
GO:0035556	intracellular signal transduction	GO:0009987	cellular process	GO:0019222	regulation of metabolic process			GO:0031399	regulation of protein modification process	GO:0043412	macromolecule modification	GO:0044260	cellular macromolecule metabolic process			GO:0010942	positive regulation of cell death
GO:0038034	signal transduction in absence of ligand	GO:0009991	response to extracellular stimulus	GO:0019438	aromatic compound biosynthetic process			GO:0031400	negative regulation of protein modification process	GO:0043603	amide metabolic process	GO:0044271	cellular nitrogen compound biosynthetic process			GO:0015833	peptide transport
GO:0038066	p38MAPK cascade	GO:0010035	response to inorganic substance	GO:0019538	protein metabolic process			GO:0032502	developmental process	GO:0044237	cellular metabolic process	GO:0045936	negative regulation of phosphate metabolic process			GO:0016032	viral process
GO:0040012	regulation of locomotion	GO:0010467	gene expression	GO:0022407	regulation of cell-cell adhesion			GO:0033554	cellular response to stress	GO:0044238	primary metabolic process	GO:0046483	heterocycle metabolic process			GO:0016049	cell growth
GO:0042088	T-helper 1 type immune response	GO:0010638	positive regulation of organelle organization	GO:0022613	ribonucleoprotein complex biogenesis			GO:0034641	cellular nitrogen compound metabolic process	GO:0044249	cellular biosynthetic process	GO:0048518	positive regulation of biological process			GO:0016070	RNA metabolic process
GO:0042127	regulation of cell population proliferation	GO:0010646	regulation of cell communication	GO:0030097	hemopoiesis			GO:0034645	cellular macromolecule biosynthetic process	GO:0044260	cellular macromolecule metabolic process	GO:0048519	negative regulation of biological process			GO:0016071	mRNA metabolic process
GO:0042221	response to chemical	GO:0010941	regulation of cell death	GO:0031399	regulation of protein modification process			GO:0034654	nucleobase-containing compound biosynthetic process	GO:0044271	cellular nitrogen compound biosynthetic process	GO:0048522	positive regulation of cellular process			GO:0016567	protein ubiquitination
GO:0043065	positive regulation of apoptotic process	GO:0015833	peptide transport	GO:0032446	protein modification by small protein conjugation			GO:0035239	tube morphogenesis	GO:0046136	positive regulation of vitamin metabolic process	GO:0048583	regulation of response to stimulus			GO:0016570	histone modification
GO:0043154	negative regulation of cysteine-type endopeptidase activity involved in apoptotic process	GO:0016032	viral process	GO:0032502	developmental process			GO:0035556	intracellular signal transduction	GO:0046483	heterocycle metabolic process	GO:0051128	regulation of cellular component organization			GO:0018130	heterocycle biosynthetic process
GO:0043408	regulation of MAPK cascade	GO:0016070	RNA metabolic process	GO:0033036	macromolecule localization			GO:0036211	protein modification process	GO:0048518	positive regulation of biological process	GO:0051174	regulation of phosphorus metabolic process			GO:0019222	regulation of metabolic process
GO:0044249	cellular biosynthetic process	GO:0016310	phosphorylation	GO:0033554	cellular response to stress			GO:0042127	regulation of cell population proliferation	GO:0048519	negative regulation of biological process	GO:0051246	regulation of protein metabolic process			GO:0019438	aromatic compound biosynthetic process
GO:0044271	cellular nitrogen compound biosynthetic process	GO:0016477	cell migration	GO:0034097	response to cytokine			GO:0042325	regulation of phosphorylation	GO:0048522	positive regulation of cellular process	GO:0051276	chromosome organization			GO:0019538	protein metabolic process
GO:0048513	animal organ development	GO:0016567	protein ubiquitination	GO:0034340	response to type I interferon			GO:0042981	regulation of apoptotic process	GO:0048534	hematopoietic or lymphoid organ development	GO:0051338	regulation of transferase activity			GO:0022407	regulation of cell-cell adhesion
GO:0048518	positive regulation of biological process	GO:0016570	histone modification	GO:0034641	cellular nitrogen compound metabolic process			GO:0043170	macromolecule metabolic process	GO:0048583	regulation of response to stimulus	GO:0060334	regulation of type II interferon-mediated signaling pathway			GO:0023051	regulation of signaling
GO:0048519	negative regulation of biological process	GO:0018130	heterocycle biosynthetic process	GO:0034645	cellular macromolecule biosynthetic process			GO:0043412	macromolecule modification	GO:0051052	regulation of DNA metabolic process	GO:0065003	protein-containing complex assembly			GO:0030097	hemopoiesis
GO:0048523	negative regulation of cellular process	GO:0018193	peptidyl-amino acid modification	GO:0034654	nucleobase-containing compound biosynthetic process			GO:0043603	amide metabolic process	GO:0051246	regulation of protein metabolic process	GO:0065009	regulation of molecular function			GO:0031323	regulation of cellular metabolic process
GO:0048534	hematopoietic or lymphoid organ development	GO:0019079	viral genome replication	GO:0035456	response to interferon-beta			GO:0043933	protein-containing complex organization	GO:0060558	regulation of calcidiol 1-monooxygenase activity	GO:0070647	protein modification by small protein conjugation or removal			GO:0031399	regulation of protein modification process
GO:0048583	regulation of response to stimulus	GO:0019222	regulation of metabolic process	GO:0035556	intracellular signal transduction			GO:0044085	cellular component biogenesis	GO:0060759	regulation of response to cytokine stimulus	GO:0070887	cellular response to chemical stimulus			GO:0031622	positive regulation of fever generation
GO:0048646	anatomical structure formation involved in morphogenesis	GO:0019438	aromatic compound biosynthetic process	GO:0036211	protein modification process			GO:0044087	regulation of cellular component biogenesis	GO:0071345	cellular response to cytokine stimulus	GO:0071704	organic substance metabolic process			GO:0031650	regulation of heat generation
GO:0048659	smooth muscle cell proliferation	GO:0019538	protein metabolic process	GO:0040007	growth			GO:0044237	cellular metabolic process	GO:0071704	organic substance metabolic process	GO:0071840	cellular component organization or biogenesis			GO:0032496	response to lipopolysaccharide
GO:0048660	regulation of smooth muscle cell proliferation	GO:0022407	regulation of cell-cell adhesion	GO:0040008	regulation of growth			GO:0044238	primary metabolic process	GO:0071840	cellular component organization or biogenesis	GO:0080134	regulation of response to stress			GO:0032502	developmental process
GO:0048661	positive regulation of smooth muscle cell proliferation	GO:0022607	cellular component assembly	GO:0042886	amide transport			GO:0044249	cellular biosynthetic process	GO:0080134	regulation of response to stress	GO:0090304	nucleic acid metabolic process			GO:0032633	interleukin-4 production
GO:0048771	tissue remodeling	GO:0022612	gland morphogenesis	GO:0042981	regulation of apoptotic process			GO:0044260	cellular macromolecule metabolic process	GO:0090304	nucleic acid metabolic process	GO:1901360	organic cyclic compound metabolic process			GO:0032673	regulation of interleukin-4 production
GO:0050789	regulation of biological process	GO:0023051	regulation of signaling	GO:0043170	macromolecule metabolic process			GO:0044265	cellular macromolecule catabolic process	GO:1901360	organic cyclic compound metabolic process	GO:1901362	organic cyclic compound biosynthetic process			GO:0032713	negative regulation of interleukin-4 production
GO:0050790	regulation of catalytic activity	GO:0030097	hemopoiesis	GO:0043412	macromolecule modification			GO:0044271	cellular nitrogen compound biosynthetic process	GO:1901362	organic cyclic compound biosynthetic process	GO:1901564	organonitrogen compound metabolic process			GO:0032879	regulation of localization
GO:0050793	regulation of developmental process	GO:0030155	regulation of cell adhesion	GO:0043618	regulation of transcription from RNA polymerase II promoter in response to stress			GO:0045653	negative regulation of megakaryocyte differentiation	GO:1901564	organonitrogen compound metabolic process	GO:1901566	organonitrogen compound biosynthetic process			GO:0033036	macromolecule localization
GO:0050896	response to stimulus	GO:0030198	extracellular matrix organization	GO:0043620	regulation of DNA-templated transcription in response to stress			GO:0045664	regulation of neuron differentiation	GO:1901576	organic substance biosynthetic process	GO:1901576	organic substance biosynthetic process			GO:0033043	regulation of organelle organization
GO:0051093	negative regulation of developmental process	GO:0030278	regulation of ossification	GO:0043903	regulation of biological process involved in symbiotic interaction			GO:0046483	heterocycle metabolic process	GO:2000112	regulation of cellular macromolecule biosynthetic process	GO:2000112	regulation of cellular macromolecule biosynthetic process			GO:0033554	cellular response to stress
GO:0051094	positive regulation of developmental process	GO:0030334	regulation of cell migration	GO:0043933	protein-containing complex organization			GO:0046777	protein autophosphorylation							GO:0033962	P-body assembly
GO:0051174	regulation of phosphorus metabolic process	GO:0030522	intracellular receptor signaling pathway	GO:0044237	cellular metabolic process			GO:0046854	phosphatidylinositol phosphate biosynthetic process							GO:0034113	heterotypic cell-cell adhesion
GO:0051239	regulation of multicellular organismal process	GO:0031323	regulation of cellular metabolic process	GO:0044238	primary metabolic process			GO:0048518	positive regulation of biological process							GO:0034248	regulation of amide metabolic process
GO:0051240	positive regulation of multicellular organismal process	GO:0031399	regulation of protein modification process	GO:0044249	cellular biosynthetic process			GO:0048519	negative regulation of biological process							GO:0034641	cellular nitrogen compound metabolic process
GO:0051246	regulation of protein metabolic process	GO:0031650	regulation of heat generation	GO:0044260	cellular macromolecule metabolic process			GO:0048523	negative regulation of cellular process							GO:0034645	cellular macromolecule biosynthetic process
GO:0051707	response to other organism	GO:0031667	response to nutrient levels	GO:0044265	cellular macromolecule catabolic process			GO:0048534	hematopoietic or lymphoid organ development							GO:0034654	nucleobase-containing compound biosynthetic process
GO:0051716	cellular response to stimulus	GO:0032501	multicellular organismal process	GO:0044271	cellular nitrogen compound biosynthetic process			GO:0048583	regulation of response to stimulus							GO:0035556	intracellular signal transduction
GO:0065007	biological regulation	GO:0032502	developmental process	GO:0044403	biological process involved in symbiotic interaction			GO:0050793	regulation of developmental process							GO:0036211	protein modification process
GO:0065009	regulation of molecular function	GO:0032879	regulation of localization	GO:0044419	biological process involved in interspecies interaction between organisms			GO:0051128	regulation of cellular component organization							GO:0036293	response to decreased oxygen levels
GO:0070887	cellular response to chemical stimulus	GO:0032963	collagen metabolic process	GO:0046483	heterocycle metabolic process			GO:0051174	regulation of phosphorus metabolic process							GO:0040007	growth
GO:0071456	cellular response to hypoxia	GO:0033002	muscle cell proliferation	GO:0046834	lipid phosphorylation			GO:0051239	regulation of multicellular organismal process							GO:0040008	regulation of growth
GO:0080135	regulation of cellular response to stress	GO:0033036	macromolecule localization	GO:0046854	phosphatidylinositol phosphate biosynthetic process			GO:0051246	regulation of protein metabolic process							GO:0040011	locomotion
GO:0090304	nucleic acid metabolic process	GO:0034641	cellular nitrogen compound metabolic process	GO:0046907	intracellular transport			GO:0051276	chromosome organization							GO:0042592	homeostatic process
GO:0097191	extrinsic apoptotic signaling pathway	GO:0034645	cellular macromolecule biosynthetic process	GO:0048518	positive regulation of biological process			GO:0051338	regulation of transferase activity							GO:0042886	amide transport
GO:0097530	granulocyte migration	GO:0034968	histone lysine methylation	GO:0048519	negative regulation of biological process			GO:0051641	cellular localization							GO:0043112	receptor metabolic process
GO:1900745	positive regulation of p38MAPK cascade	GO:0035239	tube morphogenesis	GO:0048525	negative regulation of viral process			GO:0060011	Sertoli cell proliferation							GO:0043170	macromolecule metabolic process
GO:1901576	organic substance biosynthetic process	GO:0035455	response to interferon-alpha	GO:0048534	hematopoietic or lymphoid organ development			GO:0065009	regulation of molecular function							GO:0043412	macromolecule modification
GO:1901698	response to nitrogen compound	GO:0035456	response to interferon-beta	GO:0048583	regulation of response to stimulus			GO:0070486	leukocyte aggregation							GO:0043603	amide metabolic process
GO:1905952	regulation of lipid localization	GO:0035457	cellular response to interferon-alpha	GO:0050790	regulation of catalytic activity			GO:0070647	protein modification by small protein conjugation or removal							GO:0043903	regulation of biological process involved in symbiotic interaction
GO:1905954	positive regulation of lipid localization	GO:0035458	cellular response to interferon-beta	GO:0050792	regulation of viral process			GO:0071310	cellular response to organic substance							GO:0044237	cellular metabolic process
GO:2000112	regulation of cellular macromolecule biosynthetic process	GO:0035556	intracellular signal transduction	GO:0051128	regulation of cellular component organization			GO:0071704	organic substance metabolic process							GO:0044238	primary metabolic process
		GO:0036072	direct ossification	GO:0051171	regulation of nitrogen compound metabolic process			GO:0071840	cellular component organization or biogenesis							GO:0044249	cellular biosynthetic process
		GO:0036211	protein modification process	GO:0051174	regulation of phosphorus metabolic process			GO:0090304	nucleic acid metabolic process							GO:0044260	cellular macromolecule metabolic process
		GO:0036293	response to decreased oxygen levels	GO:0051246	regulation of protein metabolic process			GO:0120036	plasma membrane bounded cell projection organization							GO:0044265	cellular macromolecule catabolic process
		GO:0040007	growth	GO:0051276	chromosome organization			GO:1901360	organic cyclic compound metabolic process							GO:0044271	cellular nitrogen compound biosynthetic process
		GO:0040011	locomotion	GO:0051641	cellular localization			GO:1901362	organic cyclic compound biosynthetic process							GO:0044419	biological process involved in interspecies interaction between organisms
		GO:0040012	regulation of locomotion	GO:0060337	type I interferon-mediated signaling pathway			GO:1901564	organonitrogen compound metabolic process							GO:0045071	negative regulation of viral genome replication
		GO:0042060	wound healing	GO:0060759	regulation of response to cytokine stimulus			GO:1901566	organonitrogen compound biosynthetic process							GO:0045595	regulation of cell differentiation
		GO:0042127	regulation of cell population proliferation	GO:0065009	regulation of molecular function			GO:1901576	organic substance biosynthetic process							GO:0045661	regulation of myoblast differentiation
		GO:0042136	neurotransmitter biosynthetic process	GO:0070647	protein modification by small protein conjugation or removal			GO:1901700	response to oxygen-containing compound							GO:0045672	positive regulation of osteoclast differentiation
		GO:0042221	response to chemical	GO:0070887	cellular response to chemical stimulus			GO:1904707	positive regulation of vascular associated smooth muscle cell proliferation							GO:0046483	heterocycle metabolic process
		GO:0042592	homeostatic process	GO:0070988	demethylation			GO:1990874	vascular associated smooth muscle cell proliferation							GO:0048513	animal organ development
		GO:0042886	amide transport	GO:0071216	cellular response to biotic stimulus			GO:2000026	regulation of multicellular organismal development							GO:0048518	positive regulation of biological process
		GO:0042981	regulation of apoptotic process	GO:0071396	cellular response to lipid			GO:2000112	regulation of cellular macromolecule biosynthetic process							GO:0048519	negative regulation of biological process
		GO:0043009	chordate embryonic development	GO:0071557	histone H3-K27 demethylation											GO:0048522	positive regulation of cellular process
		GO:0043062	extracellular structure organization	GO:0071704	organic substance metabolic process											GO:0048523	negative regulation of cellular process
		GO:0043170	macromolecule metabolic process	GO:0071705	nitrogen compound transport											GO:0048534	hematopoietic or lymphoid organ development
		GO:0043277	apoptotic cell clearance	GO:0071706	tumor necrosis factor superfamily cytokine production											GO:0048583	regulation of response to stimulus
		GO:0043412	macromolecule modification	GO:0071840	cellular component organization or biogenesis											GO:0048870	cell motility
		GO:0043491	protein kinase B signaling	GO:0080134	regulation of response to stress											GO:0050792	regulation of viral process
		GO:0043618	regulation of transcription from RNA polymerase II promoter in response to stress	GO:0090304	nucleic acid metabolic process											GO:0050793	regulation of developmental process
		GO:0043620	regulation of DNA-templated transcription in response to stress	GO:1901360	organic cyclic compound metabolic process											GO:0050794	regulation of cellular process
		GO:0043903	regulation of biological process involved in symbiotic interaction	GO:1901362	organic cyclic compound biosynthetic process											GO:0050900	leukocyte migration
		GO:0043933	protein-containing complex organization	GO:1901564	organonitrogen compound metabolic process											GO:0051093	negative regulation of developmental process
		GO:0044085	cellular component biogenesis	GO:1901576	organic substance biosynthetic process											GO:0051128	regulation of cellular component organization
		GO:0044237	cellular metabolic process	GO:1901701	cellular response to oxygen-containing compound											GO:0051174	regulation of phosphorus metabolic process
		GO:0044238	primary metabolic process	GO:1902532	negative regulation of intracellular signal transduction											GO:0051179	localization
		GO:0044248	cellular catabolic process	GO:1903555	regulation of tumor necrosis factor superfamily cytokine production											GO:0051239	regulation of multicellular organismal process
		GO:0044249	cellular biosynthetic process	GO:2000112	regulation of cellular macromolecule biosynthetic process											GO:0051246	regulation of protein metabolic process
		GO:0044260	cellular macromolecule metabolic process													GO:0051276	chromosome organization
		GO:0044271	cellular nitrogen compound biosynthetic process													GO:0051641	cellular localization
		GO:0044403	biological process involved in symbiotic interaction													GO:0051649	establishment of localization in cell
		GO:0044419	biological process involved in interspecies interaction between organisms													GO:0051674	localization of cell
		GO:0044706	multi-multicellular organism process													GO:0051726	regulation of cell cycle
		GO:0045071	negative regulation of viral genome replication													GO:0052472	modulation by host of symbiont transcription
		GO:0045087	innate immune response													GO:0061614	miRNA transcription
		GO:0045428	regulation of nitric oxide biosynthetic process													GO:0065007	biological regulation
		GO:0045444	fat cell differentiation													GO:0065008	regulation of biological quality
		GO:0045595	regulation of cell differentiation													GO:0065009	regulation of molecular function
		GO:0045861	negative regulation of proteolysis													GO:0070098	chemokine-mediated signaling pathway
		GO:0046483	heterocycle metabolic process													GO:0070482	response to oxygen levels
		GO:0046903	secretion													GO:0070647	protein modification by small protein conjugation or removal
		GO:0048518	positive regulation of biological process													GO:0070887	cellular response to chemical stimulus
		GO:0048519	negative regulation of biological process													GO:0071466	cellular response to xenobiotic stimulus
		GO:0048522	positive regulation of cellular process													GO:0071704	organic substance metabolic process
		GO:0048523	negative regulation of cellular process													GO:0071705	nitrogen compound transport
		GO:0048534	hematopoietic or lymphoid organ development													GO:0071840	cellular component organization or biogenesis
		GO:0048583	regulation of response to stimulus													GO:0072594	establishment of protein localization to organelle
		GO:0048589	developmental growth													GO:0090304	nucleic acid metabolic process
		GO:0048659	smooth muscle cell proliferation													GO:0090503	RNA phosphodiester bond hydrolysis, exonucleolytic
		GO:0048732	gland development													GO:1901031	regulation of response to reactive oxygen species
		GO:0048771	tissue remodeling													GO:1901360	organic cyclic compound metabolic process
		GO:0048856	anatomical structure development													GO:1901362	organic cyclic compound biosynthetic process
		GO:0048870	cell motility													GO:1901564	organonitrogen compound metabolic process
		GO:0048872	homeostasis of number of cells													GO:1901566	organonitrogen compound biosynthetic process
		GO:0050790	regulation of catalytic activity													GO:1901576	organic substance biosynthetic process
		GO:0050792	regulation of viral process													GO:1901698	response to nitrogen compound
		GO:0050793	regulation of developmental process													GO:1902882	regulation of response to oxidative stress
		GO:0050794	regulation of cellular process													GO:1903311	regulation of mRNA metabolic process
		GO:0050896	response to stimulus													GO:1904761	negative regulation of myofibroblast differentiation
		GO:0051049	regulation of transport													GO:1990090	cellular response to nerve growth factor stimulus
		GO:0051093	negative regulation of developmental process													GO:2000112	regulation of cellular macromolecule biosynthetic process
		GO:0051128	regulation of cellular component organization
		GO:0051146	striated muscle cell differentiation
		GO:0051174	regulation of phosphorus metabolic process
		GO:0051179	localization
		GO:0051239	regulation of multicellular organismal process
		GO:0051246	regulation of protein metabolic process
		GO:0051276	chromosome organization
		GO:0051641	cellular localization
		GO:0051674	localization of cell
		GO:0051716	cellular response to stimulus
		GO:0051726	regulation of cell cycle
		GO:0051896	regulation of protein kinase B signaling
		GO:0051897	positive regulation of protein kinase B signaling
		GO:0055123	digestive system development
		GO:0060343	trabecula formation
		GO:0060759	regulation of response to cytokine stimulus
		GO:0060760	positive regulation of response to cytokine stimulus
		GO:0061383	trabecula morphogenesis
		GO:0065007	biological regulation
		GO:0065008	regulation of biological quality
		GO:0065009	regulation of molecular function
		GO:0070371	ERK1 and ERK2 cascade
		GO:0070482	response to oxygen levels
		GO:0070647	protein modification by small protein conjugation or removal
		GO:0070887	cellular response to chemical stimulus
		GO:0071230	cellular response to amino acid stimulus
		GO:0071363	cellular response to growth factor stimulus
		GO:0071466	cellular response to xenobiotic stimulus
		GO:0071604	transforming growth factor beta production
		GO:0071702	organic substance transport
		GO:0071704	organic substance metabolic process
		GO:0071705	nitrogen compound transport
		GO:0071840	cellular component organization or biogenesis
		GO:0072593	reactive oxygen species metabolic process
		GO:0090304	nucleic acid metabolic process
		GO:0098609	cell-cell adhesion
		GO:1901360	organic cyclic compound metabolic process
		GO:1901362	organic cyclic compound biosynthetic process
		GO:1901564	organonitrogen compound metabolic process
		GO:1901576	organic substance biosynthetic process
		GO:1901698	response to nitrogen compound
		GO:1903409	reactive oxygen species biosynthetic process
		GO:1903426	regulation of reactive oxygen species biosynthetic process
		GO:2000108	positive regulation of leukocyte apoptotic process
		GO:2000112	regulation of cellular macromolecule biosynthetic process
		GO:2000377	regulation of reactive oxygen species metabolic process
		GO:2001057	reactive nitrogen species metabolic process

## Sheet: Summary
GO num	GO term	Total count	Netrophils	Macrophages	Dendritic cells	NK cells	ILC1	NKT cells	CD8 T cells	CD4 T cells	DNT cells	B cells	ILC2	ILC3
GO:0000165	MAPK cascade	4	1	1	0	0	1	0	0	0	1	0	0	0
GO:0001660	fever generation	2	1	0	0	0	0	0	0	0	1	0	0	0
GO:0001775	cell activation	3	1	1	0	0	0	0	0	0	1	0	0	0
GO:0001816	cytokine production	5	1	1	1	0	0	1	0	0	1	0	0	0
GO:0002376	immune system process	6	1	1	1	0	1	1	0	0	1	0	0	0
GO:0002520	immune system development	4	1	0	1	0	1	0	0	0	1	0	0	0
GO:0002521	leukocyte differentiation	2	1	0	0	0	0	1	0	0	0	0	0	0
GO:0002682	regulation of immune system process	6	1	1	1	0	1	1	0	0	1	0	0	0
GO:0002684	positive regulation of immune system process	1	1	0	0	0	0	0	0	0	0	0	0	0
GO:0002825	regulation of T-helper 1 type immune response	1	1	0	0	0	0	0	0	0	0	0	0	0
GO:0003018	vascular process in circulatory system	1	1	0	0	0	0	0	0	0	0	0	0	0
GO:0006351	DNA-templated transcription	3	1	1	0	0	0	1	0	0	0	0	0	0
GO:0006357	regulation of transcription by RNA polymerase II	7	1	1	1	0	1	1	1	0	1	0	0	0
GO:0006366	transcription by RNA polymerase II	7	1	1	1	0	1	1	1	0	1	0	0	0
GO:0006468	protein phosphorylation	5	1	1	1	0	1	0	0	0	1	0	0	0
GO:0006950	response to stress	7	1	1	1	0	1	1	1	0	1	0	0	0
GO:0006954	inflammatory response	2	1	1	0	0	0	0	0	0	0	0	0	0
GO:0006979	response to oxidative stress	3	1	1	0	0	0	0	0	0	1	0	0	0
GO:0007155	cell adhesion	2	1	1	0	0	0	0	0	0	0	0	0	0
GO:0007162	negative regulation of cell adhesion	1	1	0	0	0	0	0	0	0	0	0	0	0
GO:0007166	cell surface receptor signaling pathway	4	1	1	0	0	1	0	0	0	1	0	0	0
GO:0007249	I-kappaB kinase/NF-kappaB signaling	3	1	0	1	0	0	1	0	0	0	0	0	0
GO:0008219	cell death	7	1	1	1	1	1	1	0	0	1	0	0	0
GO:0008283	cell population proliferation	3	1	1	0	0	0	0	0	0	1	0	0	0
GO:0009058	biosynthetic process	7	1	1	1	0	1	1	1	0	1	0	0	0
GO:0009059	macromolecule biosynthetic process	8	1	1	1	1	1	1	1	0	1	0	0	0
GO:0009410	response to xenobiotic stimulus	3	1	1	1	0	0	0	0	0	0	0	0	0
GO:0009605	response to external stimulus	3	1	1	0	0	0	0	0	0	1	0	0	0
GO:0009607	response to biotic stimulus	4	1	1	1	0	0	0	0	0	1	0	0	0
GO:0010035	response to inorganic substance	2	1	1	0	0	0	0	0	0	0	0	0	0
GO:0010646	regulation of cell communication	5	1	1	0	0	1	1	0	0	1	0	0	0
GO:0010941	regulation of cell death	6	1	1	1	1	1	0	0	0	1	0	0	0
GO:0016310	phosphorylation	5	1	1	1	0	1	1	0	0	0	0	0	0
GO:0018130	heterocycle biosynthetic process	7	1	1	1	0	1	1	1	0	1	0	0	0
GO:0019222	regulation of metabolic process	8	1	1	1	1	1	1	1	0	1	0	0	0
GO:0019438	aromatic compound biosynthetic process	7	1	1	1	0	1	1	1	0	1	0	0	0
GO:0023051	regulation of signaling	5	1	1	0	0	1	1	0	0	1	0	0	0
GO:0030155	regulation of cell adhesion	2	1	1	0	0	0	0	0	0	0	0	0	0
GO:0030335	positive regulation of cell migration	1	1	0	0	0	0	0	0	0	0	0	0	0
GO:0031326	regulation of cellular biosynthetic process	1	1	0	0	0	0	0	0	0	0	0	0	0
GO:0031399	regulation of protein modification process	6	1	1	1	0	1	0	1	0	1	0	0	0
GO:0032101	regulation of response to external stimulus	1	1	0	0	0	0	0	0	0	0	0	0	0
GO:0032103	positive regulation of response to external stimulus	1	1	0	0	0	0	0	0	0	0	0	0	0
GO:0032502	developmental process	6	1	1	1	0	1	1	0	0	1	0	0	0
GO:0032879	regulation of localization	3	1	1	0	0	0	0	0	0	1	0	0	0
GO:0033002	muscle cell proliferation	2	1	1	0	0	0	0	0	0	0	0	0	0
GO:0033554	cellular response to stress	5	1	0	1	0	1	0	1	0	1	0	0	0
GO:0034103	regulation of tissue remodeling	1	1	0	0	0	0	0	0	0	0	0	0	0
GO:0034641	cellular nitrogen compound metabolic process	10	1	1	1	1	1	1	1	1	1	0	1	0
GO:0034645	cellular macromolecule biosynthetic process	8	1	1	1	1	1	1	1	0	1	0	0	0
GO:0035556	intracellular signal transduction	6	1	1	1	0	1	1	0	0	1	0	0	0
GO:0038034	signal transduction in absence of ligand	1	1	0	0	0	0	0	0	0	0	0	0	0
GO:0038066	p38MAPK cascade	1	1	0	0	0	0	0	0	0	0	0	0	0
GO:0040012	regulation of locomotion	2	1	1	0	0	0	0	0	0	0	0	0	0
GO:0042088	T-helper 1 type immune response	1	1	0	0	0	0	0	0	0	0	0	0	0
GO:0042127	regulation of cell population proliferation	3	1	1	0	0	1	0	0	0	0	0	0	0
GO:0042221	response to chemical	2	1	1	0	0	0	0	0	0	0	0	0	0
GO:0043065	positive regulation of apoptotic process	1	1	0	0	0	0	0	0	0	0	0	0	0
GO:0043154	negative regulation of cysteine-type endopeptidase activity involved in apoptotic process	1	1	0	0	0	0	0	0	0	0	0	0	0
GO:0043408	regulation of MAPK cascade	1	1	0	0	0	0	0	0	0	0	0	0	0
GO:0044249	cellular biosynthetic process	7	1	1	1	0	1	1	1	0	1	0	0	0
GO:0044271	cellular nitrogen compound biosynthetic process	7	1	1	1	0	1	1	1	0	1	0	0	0
GO:0048513	animal organ development	2	1	0	0	0	0	0	0	0	1	0	0	0
GO:0048518	positive regulation of biological process	7	1	1	1	0	1	1	1	0	1	0	0	0
GO:0048519	negative regulation of biological process	8	0	1	1	1	1	1	1	0	1	0	0	0
GO:0048523	negative regulation of cellular process	4	0	0	0	0	1	0	0	0	1	0	0	0
GO:0048534	hematopoietic or lymphoid organ development	6	0	0	1	0	1	1	0	0	1	0	0	0
GO:0048583	regulation of response to stimulus	7	0	0	1	0	1	1	1	0	1	0	0	0
GO:0048646	anatomical structure formation involved in morphogenesis	1	0	0	0	0	0	0	0	0	0	0	0	0
GO:0048659	smooth muscle cell proliferation	2	0	0	0	0	0	0	0	0	0	0	0	0
GO:0048660	regulation of smooth muscle cell proliferation	1	0	0	0	0	0	0	0	0	0	0	0	0
GO:0048661	positive regulation of smooth muscle cell proliferation	1	0	0	0	0	0	0	0	0	0	0	0	0
GO:0048771	tissue remodeling	2	0	0	0	0	0	0	0	0	0	0	0	0
GO:0050789	regulation of biological process	1	0	0	0	0	0	0	0	0	0	0	0	0
GO:0050790	regulation of catalytic activity	3	0	0	1	0	0	0	0	0	0	0	0	0
GO:0050793	regulation of developmental process	4	0	0	0	0	1	0	0	0	1	0	0	0
GO:0050896	response to stimulus	2	0	0	0	0	0	0	0	0	0	0	0	0
GO:0051093	negative regulation of developmental process	3	0	0	0	0	0	0	0	0	1	0	0	0
GO:0051094	positive regulation of developmental process	1	0	0	0	0	0	0	0	0	0	0	0	0
GO:0051174	regulation of phosphorus metabolic process	6	0	0	1	0	1	0	1	0	1	0	0	0
GO:0051239	regulation of multicellular organismal process	4	0	0	0	0	1	0	0	0	1	0	0	0
GO:0051240	positive regulation of multicellular organismal process	1	0	0	0	0	0	0	0	0	0	0	0	0
GO:0051246	regulation of protein metabolic process	7	0	0	1	0	1	1	1	0	1	0	0	0
GO:0051707	response to other organism	1	0	0	0	0	0	0	0	0	0	0	0	0
GO:0051716	cellular response to stimulus	2	0	0	0	0	0	0	0	0	0	0	0	0
GO:0065007	biological regulation	3	0	0	0	0	0	0	0	0	1	0	0	0
GO:0065009	regulation of molecular function	6	0	0	1	0	1	0	1	0	1	0	0	0
GO:0070887	cellular response to chemical stimulus	5	0	0	1	0	0	0	1	0	1	0	0	0
GO:0071456	cellular response to hypoxia	1	0	0	0	0	0	0	0	0	0	0	0	0
GO:0080135	regulation of cellular response to stress	1	0	0	0	0	0	0	0	0	0	0	0	0
GO:0090304	nucleic acid metabolic process	8	0	0	1	1	1	1	1	0	0	0	0	0
GO:0097191	extrinsic apoptotic signaling pathway	1	0	0	0	0	0	0	0	0	0	0	0	0
GO:0097530	granulocyte migration	1	0	0	0	0	0	0	0	0	0	0	0	0
GO:1900745	positive regulation of p38MAPK cascade	1	0	0	0	0	0	0	0	0	0	0	0	0
GO:1901576	organic substance biosynthetic process	7	0	0	1	0	1	1	1	0	0	0	0	0
GO:1901698	response to nitrogen compound	3	0	0	0	0	0	0	0	0	0	0	0	0
GO:1905952	regulation of lipid localization	1	0	0	0	0	0	0	0	0	0	0	0	0
GO:1905954	positive regulation of lipid localization	1	0	0	0	0	0	0	0	0	0	0	0	0
GO:2000112	regulation of cellular macromolecule biosynthetic process	8	0	0	1	1	1	1	1	0	0	0	0	0
GO:0001501	skeletal system development	1	0	1	0	0	0	0	0	0	0	0	0	0
GO:0001503	ossification	2	0	1	0	0	0	0	0	0	1	0	0	0
GO:0001568	blood vessel development	1	0	1	0	0	0	0	0	0	0	0	0	0
GO:0001763	morphogenesis of a branching structure	1	0	1	0	0	0	0	0	0	0	0	0	0
GO:0001817	regulation of cytokine production	3	0	1	1	0	0	1	0	0	0	0	0	0
GO:0001932	regulation of protein phosphorylation	2	0	1	0	0	0	0	0	0	1	0	0	0
GO:0001957	intramembranous ossification	1	0	1	0	0	0	0	0	0	0	0	0	0
GO:0002237	response to molecule of bacterial origin	2	0	1	1	0	0	0	0	0	0	0	0	0
GO:0003158	endothelium development	1	0	1	0	0	0	0	0	0	0	0	0	0
GO:0006139	nucleobase-containing compound metabolic process	7	0	1	1	1	1	1	1	0	1	0	0	0
GO:0006325	chromatin organization	5	0	1	1	0	1	0	1	0	1	0	0	0
GO:0006725	cellular aromatic compound metabolic process	7	0	1	1	1	1	1	1	0	1	0	0	0
GO:0006793	phosphorus metabolic process	5	0	1	1	0	1	0	1	0	1	0	0	0
GO:0006807	nitrogen compound metabolic process	7	0	1	1	1	1	1	1	0	1	0	0	0
GO:0006809	nitric oxide biosynthetic process	1	0	1	0	0	0	0	0	0	0	0	0	0
GO:0006810	transport	1	0	1	0	0	0	0	0	0	0	0	0	0
GO:0006915	apoptotic process	6	0	1	1	1	1	1	0	0	1	0	0	0
GO:0006952	defense response	2	0	1	0	0	0	1	0	0	0	0	0	0
GO:0006996	organelle organization	5	0	1	1	0	1	0	1	0	1	0	0	0
GO:0007159	leukocyte cell-cell adhesion	1	0	1	0	0	0	0	0	0	0	0	0	0
GO:0007167	enzyme-linked receptor protein signaling pathway	1	0	1	0	0	0	0	0	0	0	0	0	0
GO:0008104	protein localization	1	0	1	0	0	0	0	0	0	0	0	0	0
GO:0008152	metabolic process	6	0	1	1	0	1	1	1	0	1	0	0	0
GO:0008285	negative regulation of cell population proliferation	1	0	1	0	0	0	0	0	0	0	0	0	0
GO:0009056	catabolic process	4	0	1	1	0	1	0	0	0	1	0	0	0
GO:0009611	response to wounding	1	0	1	0	0	0	0	0	0	0	0	0	0
GO:0009628	response to abiotic stimulus	3	0	1	1	0	0	0	0	0	1	0	0	0
GO:0009719	response to endogenous stimulus	1	0	1	0	0	0	0	0	0	0	0	0	0
GO:0009966	regulation of signal transduction	4	0	1	0	1	1	0	0	0	1	0	0	0
GO:0009987	cellular process	6	0	1	1	0	1	1	1	0	1	0	0	0
GO:0009991	response to extracellular stimulus	1	0	1	0	0	0	0	0	0	0	0	0	0
GO:0010467	gene expression	8	0	1	1	1	1	1	1	0	1	0	1	0
GO:0010638	positive regulation of organelle organization	2	0	1	0	0	1	0	0	0	0	0	0	0
GO:0015833	peptide transport	3	0	1	1	0	0	0	0	0	1	0	0	0
GO:0016032	viral process	3	0	1	1	0	0	0	0	0	1	0	0	0
GO:0016070	RNA metabolic process	7	0	1	1	1	1	1	1	0	1	0	0	0
GO:0016477	cell migration	1	0	1	0	0	0	0	0	0	0	0	0	0
GO:0016567	protein ubiquitination	3	0	1	0	0	1	0	0	0	1	0	0	0
GO:0016570	histone modification	5	0	1	1	0	1	0	1	0	1	0	0	0
GO:0018193	peptidyl-amino acid modification	3	0	1	0	0	1	0	1	0	0	0	0	0
GO:0019079	viral genome replication	1	0	1	0	0	0	0	0	0	0	0	0	0
GO:0019538	protein metabolic process	6	0	1	1	0	1	1	1	0	1	0	0	0
GO:0022407	regulation of cell-cell adhesion	3	0	1	1	0	0	0	0	0	1	0	0	0
GO:0022607	cellular component assembly	2	0	1	0	0	1	0	0	0	0	0	0	0
GO:0022612	gland morphogenesis	1	0	1	0	0	0	0	0	0	0	0	0	0
GO:0030097	hemopoiesis	4	0	1	1	0	1	0	0	0	1	0	0	0
GO:0030198	extracellular matrix organization	1	0	1	0	0	0	0	0	0	0	0	0	0
GO:0030278	regulation of ossification	1	0	1	0	0	0	0	0	0	0	0	0	0
GO:0030334	regulation of cell migration	1	0	1	0	0	0	0	0	0	0	0	0	0
GO:0030522	intracellular receptor signaling pathway	1	0	1	0	0	0	0	0	0	0	0	0	0
GO:0031323	regulation of cellular metabolic process	5	0	1	0	0	1	1	1	0	1	0	0	0
GO:0031650	regulation of heat generation	2	0	1	0	0	0	0	0	0	1	0	0	0
GO:0031667	response to nutrient levels	1	0	1	0	0	0	0	0	0	0	0	0	0
GO:0032501	multicellular organismal process	1	0	1	0	0	0	0	0	0	0	0	0	0
GO:0032963	collagen metabolic process	1	0	1	0	0	0	0	0	0	0	0	0	0
GO:0033036	macromolecule localization	3	0	1	1	0	0	0	0	0	1	0	0	0
GO:0034968	histone lysine methylation	1	0	1	0	0	0	0	0	0	0	0	0	0
GO:0035239	tube morphogenesis	2	0	1	0	0	1	0	0	0	0	0	0	0
GO:0035455	response to interferon-alpha	1	0	1	0	0	0	0	0	0	0	0	0	0
GO:0035456	response to interferon-beta	2	0	1	1	0	0	0	0	0	0	0	0	0
GO:0035457	cellular response to interferon-alpha	1	0	1	0	0	0	0	0	0	0	0	0	0
GO:0035458	cellular response to interferon-beta	1	0	1	0	0	0	0	0	0	0	0	0	0
GO:0036072	direct ossification	1	0	1	0	0	0	0	0	0	0	0	0	0
GO:0036211	protein modification process	6	0	1	1	0	1	1	1	0	1	0	0	0
GO:0036293	response to decreased oxygen levels	2	0	1	0	0	0	0	0	0	1	0	0	0
GO:0040007	growth	3	0	1	1	0	0	0	0	0	1	0	0	0
GO:0040011	locomotion	2	0	1	0	0	0	0	0	0	1	0	0	0
GO:0042060	wound healing	1	0	1	0	0	0	0	0	0	0	0	0	0
GO:0042136	neurotransmitter biosynthetic process	1	0	1	0	0	0	0	0	0	0	0	0	0
GO:0042592	homeostatic process	2	0	1	0	0	0	0	0	0	1	0	0	0
GO:0042886	amide transport	3	0	1	1	0	0	0	0	0	1	0	0	0
GO:0042981	regulation of apoptotic process	5	0	1	1	1	1	1	0	0	0	0	0	0
GO:0043009	chordate embryonic development	1	0	1	0	0	0	0	0	0	0	0	0	0
GO:0043062	extracellular structure organization	1	0	1	0	0	0	0	0	0	0	0	0	0
GO:0043170	macromolecule metabolic process	7	0	1	1	1	1	1	1	0	1	0	0	0
GO:0043277	apoptotic cell clearance	1	0	1	0	0	0	0	0	0	0	0	0	0
GO:0043412	macromolecule modification	6	0	1	1	0	1	1	1	0	1	0	0	0
GO:0043491	protein kinase B signaling	1	0	1	0	0	0	0	0	0	0	0	0	0
GO:0043618	regulation of transcription from RNA polymerase II promoter in response to stress	2	0	1	1	0	0	0	0	0	0	0	0	0
GO:0043620	regulation of DNA-templated transcription in response to stress	2	0	1	1	0	0	0	0	0	0	0	0	0
GO:0043903	regulation of biological process involved in symbiotic interaction	3	0	1	1	0	0	0	0	0	1	0	0	0
GO:0043933	protein-containing complex organization	4	0	1	1	0	1	0	1	0	0	0	0	0
GO:0044085	cellular component biogenesis	2	0	1	0	0	1	0	0	0	0	0	0	0
GO:0044237	cellular metabolic process	7	0	1	1	1	1	1	1	0	1	0	0	0
GO:0044238	primary metabolic process	7	0	1	1	1	1	1	1	0	1	0	0	0
GO:0044248	cellular catabolic process	1	0	1	0	0	0	0	0	0	0	0	0	0
GO:0044260	cellular macromolecule metabolic process	7	0	1	1	1	1	1	1	0	1	0	0	0
GO:0044403	biological process involved in symbiotic interaction	2	0	1	1	0	0	0	0	0	0	0	0	0
GO:0044419	biological process involved in interspecies interaction between organisms	3	0	1	1	0	0	0	0	0	1	0	0	0
GO:0044706	multi-multicellular organism process	1	0	1	0	0	0	0	0	0	0	0	0	0
GO:0045071	negative regulation of viral genome replication	2	0	1	0	0	0	0	0	0	1	0	0	0
GO:0045087	innate immune response	1	0	1	0	0	0	0	0	0	0	0	0	0
GO:0045428	regulation of nitric oxide biosynthetic process	1	0	1	0	0	0	0	0	0	0	0	0	0
GO:0045444	fat cell differentiation	1	0	1	0	0	0	0	0	0	0	0	0	0
GO:0045595	regulation of cell differentiation	2	0	1	0	0	0	0	0	0	1	0	0	0
GO:0045861	negative regulation of proteolysis	1	0	1	0	0	0	0	0	0	0	0	0	0
GO:0046483	heterocycle metabolic process	7	0	1	1	1	1	1	1	0	1	0	0	0
GO:0046903	secretion	1	0	1	0	0	0	0	0	0	0	0	0	0
GO:0048522	positive regulation of cellular process	4	0	0	0	0	0	1	1	0	1	0	0	0
GO:0048589	developmental growth	1	0	0	0	0	0	0	0	0	0	0	0	0
GO:0048732	gland development	1	0	0	0	0	0	0	0	0	0	0	0	0
GO:0048856	anatomical structure development	1	0	0	0	0	0	0	0	0	0	0	0	0
GO:0048870	cell motility	2	0	0	0	0	0	0	0	0	1	0	0	0
GO:0048872	homeostasis of number of cells	1	0	0	0	0	0	0	0	0	0	0	0	0
GO:0050792	regulation of viral process	3	0	0	1	0	0	0	0	0	1	0	0	0
GO:0050794	regulation of cellular process	2	0	0	0	0	0	0	0	0	1	0	0	0
GO:0051049	regulation of transport	1	0	0	0	0	0	0	0	0	0	0	0	0
GO:0051128	regulation of cellular component organization	5	0	0	1	0	1	0	1	0	1	0	0	0
GO:0051146	striated muscle cell differentiation	1	0	0	0	0	0	0	0	0	0	0	0	0
GO:0051179	localization	2	0	0	0	0	0	0	0	0	1	0	0	0
GO:0051276	chromosome organization	5	0	0	1	0	1	0	1	0	1	0	0	0
GO:0051641	cellular localization	4	0	0	1	0	1	0	0	0	1	0	0	0
GO:0051674	localization of cell	2	0	0	0	0	0	0	0	0	1	0	0	0
GO:0051726	regulation of cell cycle	2	0	0	0	0	0	0	0	0	1	0	0	0
GO:0051896	regulation of protein kinase B signaling	1	0	0	0	0	0	0	0	0	0	0	0	0
GO:0051897	positive regulation of protein kinase B signaling	1	0	0	0	0	0	0	0	0	0	0	0	0
GO:0055123	digestive system development	1	0	0	0	0	0	0	0	0	0	0	0	0
GO:0060343	trabecula formation	1	0	0	0	0	0	0	0	0	0	0	0	0
GO:0060759	regulation of response to cytokine stimulus	3	0	0	1	0	0	1	0	0	0	0	0	0
GO:0060760	positive regulation of response to cytokine stimulus	1	0	0	0	0	0	0	0	0	0	0	0	0
GO:0061383	trabecula morphogenesis	1	0	0	0	0	0	0	0	0	0	0	0	0
GO:0065008	regulation of biological quality	2	0	0	0	0	0	0	0	0	1	0	0	0
GO:0070371	ERK1 and ERK2 cascade	1	0	0	0	0	0	0	0	0	0	0	0	0
GO:0070482	response to oxygen levels	2	0	0	0	0	0	0	0	0	1	0	0	0
GO:0070647	protein modification by small protein conjugation or removal	5	0	0	1	0	1	0	1	0	1	0	0	0
GO:0071230	cellular response to amino acid stimulus	1	0	0	0	0	0	0	0	0	0	0	0	0
GO:0071363	cellular response to growth factor stimulus	1	0	0	0	0	0	0	0	0	0	0	0	0
GO:0071466	cellular response to xenobiotic stimulus	2	0	0	0	0	0	0	0	0	1	0	0	0
GO:0071604	transforming growth factor beta production	1	0	0	0	0	0	0	0	0	0	0	0	0
GO:0071702	organic substance transport	1	0	0	0	0	0	0	0	0	0	0	0	0
GO:0071704	organic substance metabolic process	7	0	0	1	1	1	1	1	0	0	0	0	0
GO:0071705	nitrogen compound transport	3	0	0	1	0	0	0	0	0	0	0	0	0
GO:0071840	cellular component organization or biogenesis	7	0	0	1	1	1	1	1	0	0	0	0	0
GO:0072593	reactive oxygen species metabolic process	1	0	0	0	0	0	0	0	0	0	0	0	0
GO:0098609	cell-cell adhesion	1	0	0	0	0	0	0	0	0	0	0	0	0
GO:1901360	organic cyclic compound metabolic process	7	0	0	1	1	1	1	1	0	0	0	0	0
GO:1901362	organic cyclic compound biosynthetic process	6	0	0	1	0	1	1	1	0	0	0	0	0
GO:1901564	organonitrogen compound metabolic process	6	0	0	1	0	1	1	1	0	0	0	0	0
GO:1903409	reactive oxygen species biosynthetic process	1	0	0	0	0	0	0	0	0	0	0	0	0
GO:1903426	regulation of reactive oxygen species biosynthetic process	1	0	0	0	0	0	0	0	0	0	0	0	0
GO:2000108	positive regulation of leukocyte apoptotic process	1	0	0	0	0	0	0	0	0	0	0	0	0
GO:2000377	regulation of reactive oxygen species metabolic process	1	0	0	0	0	0	0	0	0	0	0	0	0
GO:2001057	reactive nitrogen species metabolic process	1	0	0	0	0	0	0	0	0	0	0	0	0
GO:0001558	regulation of cell growth	1	0	0	1	0	0	0	0	0	0	0	0	0
GO:0001961	positive regulation of cytokine-mediated signaling pathway	1	0	0	1	0	0	0	0	0	0	0	0	0
GO:0002285	lymphocyte activation involved in immune response	1	0	0	1	0	0	0	0	0	0	0	0	0
GO:0006259	DNA metabolic process	2	0	0	1	0	1	0	0	0	0	0	0	0
GO:0006260	DNA replication	1	0	0	1	0	0	0	0	0	0	0	0	0
GO:0006396	RNA processing	1	0	0	1	0	0	0	0	0	0	0	0	0
GO:0006397	mRNA processing	2	0	0	1	0	0	0	1	0	0	0	0	0
GO:0006984	ER-nucleus signaling pathway	1	0	0	1	0	0	0	0	0	0	0	0	0
GO:0006986	response to unfolded protein	1	0	0	1	0	0	0	0	0	0	0	0	0
GO:0008380	RNA splicing	1	0	0	1	0	0	0	0	0	0	0	0	0
GO:0009057	macromolecule catabolic process	3	0	0	1	0	1	0	0	0	1	0	0	0
GO:0010604	positive regulation of macromolecule metabolic process	2	0	0	1	0	1	0	0	0	0	0	0	0
GO:0010605	negative regulation of macromolecule metabolic process	2	0	0	1	1	0	0	0	0	0	0	0	0
GO:0016049	cell growth	2	0	0	1	0	0	0	0	0	1	0	0	0
GO:0016071	mRNA metabolic process	3	0	0	1	0	0	0	1	0	1	0	0	0
GO:0022613	ribonucleoprotein complex biogenesis	3	0	0	1	1	0	1	0	0	0	0	0	0
GO:0032446	protein modification by small protein conjugation	2	0	0	1	0	0	0	1	0	0	0	0	0
GO:0034097	response to cytokine	1	0	0	1	0	0	0	0	0	0	0	0	0
GO:0034340	response to type I interferon	1	0	0	1	0	0	0	0	0	0	0	0	0
GO:0034654	nucleobase-containing compound biosynthetic process	4	0	0	1	0	1	0	1	0	1	0	0	0
GO:0040008	regulation of growth	2	0	0	1	0	0	0	0	0	1	0	0	0
GO:0044265	cellular macromolecule catabolic process	3	0	0	1	0	1	0	0	0	1	0	0	0
GO:0046834	lipid phosphorylation	1	0	0	1	0	0	0	0	0	0	0	0	0
GO:0046854	phosphatidylinositol phosphate biosynthetic process	2	0	0	1	0	1	0	0	0	0	0	0	0
GO:0046907	intracellular transport	1	0	0	1	0	0	0	0	0	0	0	0	0
GO:0048525	negative regulation of viral process	1	0	0	1	0	0	0	0	0	0	0	0	0
GO:0051171	regulation of nitrogen compound metabolic process	1	0	0	1	0	0	0	0	0	0	0	0	0
GO:0060337	type I interferon-mediated signaling pathway	1	0	0	1	0	0	0	0	0	0	0	0	0
GO:0070988	demethylation	1	0	0	1	0	0	0	0	0	0	0	0	0
GO:0071216	cellular response to biotic stimulus	1	0	0	1	0	0	0	0	0	0	0	0	0
GO:0071396	cellular response to lipid	1	0	0	1	0	0	0	0	0	0	0	0	0
GO:0071557	histone H3-K27 demethylation	1	0	0	1	0	0	0	0	0	0	0	0	0
GO:0071706	tumor necrosis factor superfamily cytokine production	1	0	0	1	0	0	0	0	0	0	0	0	0
GO:0080134	regulation of response to stress	3	0	0	1	0	0	1	1	0	0	0	0	0
GO:1901701	cellular response to oxygen-containing compound	1	0	0	1	0	0	0	0	0	0	0	0	0
GO:1902532	negative regulation of intracellular signal transduction	1	0	0	1	0	0	0	0	0	0	0	0	0
GO:1903555	regulation of tumor necrosis factor superfamily cytokine production	1	0	0	1	0	0	0	0	0	0	0	0	0
GO:0019219	regulation of nucleobase-containing compound metabolic process	1	0	0	0	1	0	0	0	0	0	0	0	0
GO:0002252	immune effector process	1	0	0	0	0	1	0	0	0	0	0	0	0
GO:0006518	peptide metabolic process	4	0	0	0	0	1	1	0	1	0	1	0	0
GO:0007041	lysosomal transport	2	0	0	0	0	1	0	0	0	1	0	0	0
GO:0007049	cell cycle	2	0	0	0	0	1	0	0	0	1	0	0	0
GO:0007275	multicellular organism development	2	0	0	0	0	1	1	0	0	0	0	0	0
GO:0016197	endosomal transport	1	0	0	0	0	1	0	0	0	0	0	0	0
GO:0030030	cell projection organization	1	0	0	0	0	1	0	0	0	0	0	0	0
GO:0031400	negative regulation of protein modification process	2	0	0	0	0	1	0	1	0	0	0	0	0
GO:0042325	regulation of phosphorylation	2	0	0	0	0	1	1	0	0	0	0	0	0
GO:0043603	amide metabolic process	4	0	0	0	0	1	1	0	1	1	0	0	0
GO:0044087	regulation of cellular component biogenesis	1	0	0	0	0	1	0	0	0	0	0	0	0
GO:0045653	negative regulation of megakaryocyte differentiation	1	0	0	0	0	1	0	0	0	0	0	0	0
GO:0045664	regulation of neuron differentiation	1	0	0	0	0	1	0	0	0	0	0	0	0
GO:0046777	protein autophosphorylation	1	0	0	0	0	1	0	0	0	0	0	0	0
GO:0051338	regulation of transferase activity	2	0	0	0	0	1	0	1	0	0	0	0	0
GO:0060011	Sertoli cell proliferation	1	0	0	0	0	1	0	0	0	0	0	0	0
GO:0070486	leukocyte aggregation	1	0	0	0	0	1	0	0	0	0	0	0	0
GO:0071310	cellular response to organic substance	1	0	0	0	0	1	0	0	0	0	0	0	0
GO:0120036	plasma membrane bounded cell projection organization	1	0	0	0	0	1	0	0	0	0	0	0	0
GO:1901566	organonitrogen compound biosynthetic process	4	0	0	0	0	1	0	1	1	0	0	0	0
GO:1901700	response to oxygen-containing compound	1	0	0	0	0	1	0	0	0	0	0	0	0
GO:1904707	positive regulation of vascular associated smooth muscle cell proliferation	1	0	0	0	0	1	0	0	0	0	0	0	0
GO:1990874	vascular associated smooth muscle cell proliferation	1	0	0	0	0	1	0	0	0	0	0	0	0
GO:2000026	regulation of multicellular organismal development	1	0	0	0	0	1	0	0	0	0	0	0	0
GO:0000122	negative regulation of transcription by RNA polymerase II	1	0	0	0	0	0	1	0	0	0	0	0	0
GO:0001959	regulation of cytokine-mediated signaling pathway	1	0	0	0	0	0	1	0	0	0	0	0	0
GO:0002683	negative regulation of immune system process	1	0	0	0	0	0	1	0	0	0	0	0	0
GO:0009615	response to virus	1	0	0	0	0	0	1	0	0	0	0	0	0
GO:0009892	negative regulation of metabolic process	2	0	0	0	0	0	1	1	0	0	0	0	0
GO:0016043	cellular component organization	1	0	0	0	0	0	1	0	0	0	0	0	0
GO:0032602	chemokine production	1	0	0	0	0	0	1	0	0	0	0	0	0
GO:0032635	interleukin-6 production	1	0	0	0	0	0	1	0	0	0	0	0	0
GO:0032675	regulation of interleukin-6 production	1	0	0	0	0	0	1	0	0	0	0	0	0
GO:0046136	positive regulation of vitamin metabolic process	1	0	0	0	0	0	1	0	0	0	0	0	0
GO:0051052	regulation of DNA metabolic process	1	0	0	0	0	0	1	0	0	0	0	0	0
GO:0060558	regulation of calcidiol 1-monooxygenase activity	1	0	0	0	0	0	1	0	0	0	0	0	0
GO:0071345	cellular response to cytokine stimulus	1	0	0	0	0	0	1	0	0	0	0	0	0
GO:0006479	protein methylation	1	0	0	0	0	0	0	1	0	0	0	0	0
GO:0006796	phosphate-containing compound metabolic process	2	0	0	0	0	0	0	1	0	1	0	0	0
GO:0008213	protein alkylation	1	0	0	0	0	0	0	1	0	0	0	0	0
GO:0009123	nucleoside monophosphate metabolic process	1	0	0	0	0	0	0	1	0	0	0	0	0
GO:0018205	peptidyl-lysine modification	1	0	0	0	0	0	0	1	0	0	0	0	0
GO:0030521	androgen receptor signaling pathway	1	0	0	0	0	0	0	1	0	0	0	0	0
GO:0032259	methylation	1	0	0	0	0	0	0	1	0	0	0	0	0
GO:0033044	regulation of chromosome organization	1	0	0	0	0	0	0	1	0	0	0	0	0
GO:0033365	protein localization to organelle	1	0	0	0	0	0	0	1	0	0	0	0	0
GO:0033993	response to lipid	1	0	0	0	0	0	0	1	0	0	0	0	0
GO:0043414	macromolecule methylation	1	0	0	0	0	0	0	1	0	0	0	0	0
GO:0045936	negative regulation of phosphate metabolic process	1	0	0	0	0	0	0	1	0	0	0	0	0
GO:0060334	regulation of type II interferon-mediated signaling pathway	1	0	0	0	0	0	0	1	0	0	0	0	0
GO:0065003	protein-containing complex assembly	1	0	0	0	0	0	0	1	0	0	0	0	0
GO:0000278	mitotic cell cycle	1	0	0	0	0	0	0	0	0	1	0	0	0
GO:0001649	osteoblast differentiation	1	0	0	0	0	0	0	0	0	1	0	0	0
GO:0002687	positive regulation of leukocyte migration	1	0	0	0	0	0	0	0	0	1	0	0	0
GO:0006412	translation	1	0	0	0	0	0	0	0	0	1	0	0	0
GO:0009790	embryo development	1	0	0	0	0	0	0	0	0	1	0	0	0
GO:0009894	regulation of catabolic process	1	0	0	0	0	0	0	0	0	1	0	0	0
GO:0010469	regulation of signaling receptor activity	1	0	0	0	0	0	0	0	0	1	0	0	0
GO:0010586	miRNA metabolic process	1	0	0	0	0	0	0	0	0	1	0	0	0
GO:0010606	positive regulation of cytoplasmic mRNA processing body assembly	1	0	0	0	0	0	0	0	0	1	0	0	0
GO:0010608	post-transcriptional regulation of gene expression	1	0	0	0	0	0	0	0	0	1	0	0	0
GO:0010942	positive regulation of cell death	1	0	0	0	0	0	0	0	0	1	0	0	0
GO:0031622	positive regulation of fever generation	1	0	0	0	0	0	0	0	0	1	0	0	0
GO:0032496	response to lipopolysaccharide	1	0	0	0	0	0	0	0	0	1	0	0	0
GO:0032633	interleukin-4 production	1	0	0	0	0	0	0	0	0	1	0	0	0
GO:0032673	regulation of interleukin-4 production	1	0	0	0	0	0	0	0	0	1	0	0	0
GO:0032713	negative regulation of interleukin-4 production	1	0	0	0	0	0	0	0	0	1	0	0	0
GO:0033043	regulation of organelle organization	1	0	0	0	0	0	0	0	0	1	0	0	0
GO:0033962	P-body assembly	1	0	0	0	0	0	0	0	0	1	0	0	0
GO:0034113	heterotypic cell-cell adhesion	1	0	0	0	0	0	0	0	0	1	0	0	0
GO:0034248	regulation of amide metabolic process	1	0	0	0	0	0	0	0	0	1	0	0	0
GO:0043112	receptor metabolic process	1	0	0	0	0	0	0	0	0	1	0	0	0
GO:0045661	regulation of myoblast differentiation	1	0	0	0	0	0	0	0	0	1	0	0	0
GO:0045672	positive regulation of osteoclast differentiation	1	0	0	0	0	0	0	0	0	1	0	0	0
GO:0050900	leukocyte migration	1	0	0	0	0	0	0	0	0	1	0	0	0
GO:0051649	establishment of localization in cell	1	0	0	0	0	0	0	0	0	1	0	0	0
GO:0052472	modulation by host of symbiont transcription	1	0	0	0	0	0	0	0	0	1	0	0	0
GO:0061614	miRNA transcription	1	0	0	0	0	0	0	0	0	1	0	0	0
GO:0070098	chemokine-mediated signaling pathway	1	0	0	0	0	0	0	0	0	1	0	0	0
GO:0072594	establishment of protein localization to organelle	1	0	0	0	0	0	0	0	0	0	0	0	0
GO:0090503	RNA phosphodiester bond hydrolysis, exonucleolytic	1	0	0	0	0	0	0	0	0	0	0	0	0
GO:1901031	regulation of response to reactive oxygen species	1	0	0	0	0	0	0	0	0	0	0	0	0
GO:1902882	regulation of response to oxidative stress	1	0	0	0	0	0	0	0	0	0	0	0	0
GO:1903311	regulation of mRNA metabolic process	1	0	0	0	0	0	0	0	0	0	0	0	0
GO:1904761	negative regulation of myofibroblast differentiation	1	0	0	0	0	0	0	0	0	0	0	0	0
GO:1990090	cellular response to nerve growth factor stimulus	1	0	0	0	0	0	0	0	0	0	0	0	0
GO:0019827	stem cell population maintenance	1	0	0	0	0	0	0	0	0	0	0	1	0
GO:0090169	regulation of spindle assembly	1	0	0	0	0	0	0	0	0	0	0	1	0
GO:0098727	maintenance of cell number	1	0	0	0	0	0	0	0	0	0	0	1	0
