# Supplementary material for: Single-cell analysis of the aged ovarian immune system reveals a shift towards adaptive immunity and attenuated cell function
Source: eLife. 2023 Apr 25;12:e74915. doi: 10.7554/eLife.74915 (PMC10188116; doi:10.7554/eLife.74915)
Supplement: Supplementary file 3. [file elife-74915-supp3.xlsx]

## Sheet: Detailed List
Neutrophils			Macrophages			Dendritic			NK cells			ILC1			NKT cells			CD8 T cells			CD4 T cells			DNT cells			B cells			ILC2			ILC3
Go Term	Term name	Log10 (p value)	Go Term	Term name	Log10 (p value)	Go Term	Term name	Log10 (p value)	Go Term	Term name	Log10 (p value)	Go Term	Term name	Log10 (p value)	Go Term	Term name	Log10 (p value)	Go Term	Term name	Log10 (p value)	Go Term	Term name	Log10 (p value)	Go Term	Term name	Log10 (p value)	Go Term	Term name	Log10 (p value)	Go Term	Term name	Log10 (p value)	Go Term	Term name	Log10 (p value)
			GO:0001775	cell activation	-1.61083							GO:0061441	renal artery morphogenesis	-1.75449	GO:0043227	membrane-bounded organelle	-1.61798				GO:0010008	endosome membrane	-2.12148	GO:0000226	microtubule cytoskeleton organization	-1.82102				GO:0006169	adenosine salvage	-1.41341	GO:0001775	cell activation	-1.49621
			GO:0001816	cytokine production	-2.56225										GO:0043231	intracellular membrane-bounded organelle	-2.33913				GO:0031902	late endosome membrane	-1.88941	GO:0007017	microtubule-based process	-1.43533				GO:0006175	dATP biosynthetic process	-1.41341	GO:0046649	lymphocyte activation	-2.37263
			GO:0002520	immune system development	-1.55129																			GO:0007275	multicellular organism development	-1.7986
			GO:0002521	leukocyte differentiation	-2.40121																			GO:0016358	dendrite development	-1.57349
			GO:0007159	leukocyte cell-cell adhesion	-2.20901																			GO:0030030	cell projection organization	-2.5391
			GO:0022407	regulation of cell-cell adhesion	-1.49757																			GO:0030214	hyaluronan catabolic process	-1.59346
			GO:0032609	type II interferon production	-5.07831																			GO:0044237	cellular metabolic process	-1.45469
			GO:0032649	regulation of type II interferon production	-4.16304																			GO:0050773	regulation of dendrite development	-3.31426
			GO:0042110	T cell activation	-4.6038																			GO:0050808	synapse organization	-1.48017
			GO:0048534	hematopoietic or lymphoid organ development	-1.85387																			GO:0060996	dendritic spine development	-1.53165
			GO:0050863	regulation of T cell activation	-4.20273																			GO:0060998	regulation of dendritic spine development	-2.02457
																								GO:0071493	cellular response to UV-B	-1.59346
																								GO:0120036	plasma membrane bounded cell projection organization	-2.42597
																								GO:2000026	regulation of multicellular organismal development	-1.82681

## Sheet: All Go terms list
GO:0001775	cell activation
GO:0001816	cytokine production
GO:0002520	immune system development
GO:0002521	leukocyte differentiation
GO:0007159	leukocyte cell-cell adhesion
GO:0022407	regulation of cell-cell adhesion
GO:0032609	type II interferon production
GO:0032649	regulation of type II interferon production
GO:0042110	T cell activation
GO:0048534	hematopoietic or lymphoid organ development
GO:0050863	regulation of T cell activation
GO:0061441	renal artery morphogenesis
GO:0043227	membrane-bounded organelle
GO:0043231	intracellular membrane-bounded organelle
GO:0010008	endosome membrane
GO:0031902	late endosome membrane
GO:0000226	microtubule cytoskeleton organization
GO:0007017	microtubule-based process
GO:0007275	multicellular organism development
GO:0016358	dendrite development
GO:0030030	cell projection organization
GO:0030214	hyaluronan catabolic process
GO:0044237	cellular metabolic process
GO:0050773	regulation of dendrite development
GO:0050808	synapse organization
GO:0060996	dendritic spine development
GO:0060998	regulation of dendritic spine development
GO:0071493	cellular response to UV-B
GO:0120036	plasma membrane bounded cell projection organization
GO:2000026	regulation of multicellular organismal development
GO:0006169	adenosine salvage
GO:0006175	dATP biosynthetic process
GO:0001775	cell activation
GO:0046649	lymphocyte activation

## Sheet: Uniqe terms
GO:0001775	cell activation
GO:0001816	cytokine production
GO:0002520	immune system development
GO:0002521	leukocyte differentiation
GO:0007159	leukocyte cell-cell adhesion
GO:0022407	regulation of cell-cell adhesion
GO:0032609	type II interferon production
GO:0032649	regulation of type II interferon production
GO:0042110	T cell activation
GO:0048534	hematopoietic or lymphoid organ development
GO:0050863	regulation of T cell activation
GO:0061441	renal artery morphogenesis
GO:0043227	membrane-bounded organelle
GO:0043231	intracellular membrane-bounded organelle
GO:0010008	endosome membrane
GO:0031902	late endosome membrane
GO:0000226	microtubule cytoskeleton organization
GO:0007017	microtubule-based process
GO:0007275	multicellular organism development
GO:0016358	dendrite development
GO:0030030	cell projection organization
GO:0030214	hyaluronan catabolic process
GO:0044237	cellular metabolic process
GO:0050773	regulation of dendrite development
GO:0050808	synapse organization
GO:0060996	dendritic spine development
GO:0060998	regulation of dendritic spine development
GO:0071493	cellular response to UV-B
GO:0120036	plasma membrane bounded cell projection organization
GO:2000026	regulation of multicellular organismal development
GO:0006169	adenosine salvage
GO:0006175	dATP biosynthetic process
GO:0046649	lymphocyte activation

## Sheet: Terms by cluster
Neutrophils		Macrophages		Dendritic		NK cells		ILC1		NKT cells		CD8 T cells		CD4 T cells		DNT cells		B cells		ILC2		ILC3
		GO:0001775	cell activation					GO:0061441	renal artery morphogenesis	GO:0043227	membrane-bounded organelle			GO:0010008	endosome membrane	GO:0000226	microtubule cytoskeleton organization			GO:0006169	adenosine salvage	GO:0001775	cell activation
		GO:0001816	cytokine production							GO:0043231	intracellular membrane-bounded organelle			GO:0031902	late endosome membrane	GO:0007017	microtubule-based process			GO:0006175	dATP biosynthetic process	GO:0046649	lymphocyte activation
		GO:0002520	immune system development													GO:0007275	multicellular organism development
		GO:0002521	leukocyte differentiation													GO:0016358	dendrite development
		GO:0007159	leukocyte cell-cell adhesion													GO:0030030	cell projection organization
		GO:0022407	regulation of cell-cell adhesion													GO:0030214	hyaluronan catabolic process
		GO:0032609	type II interferon production													GO:0044237	cellular metabolic process
		GO:0032649	regulation of type II interferon production													GO:0050773	regulation of dendrite development
		GO:0042110	T cell activation													GO:0050808	synapse organization
		GO:0048534	hematopoietic or lymphoid organ development													GO:0060996	dendritic spine development
		GO:0050863	regulation of T cell activation													GO:0060998	regulation of dendritic spine development
																GO:0071493	cellular response to UV-B
																GO:0120036	plasma membrane bounded cell projection organization
																GO:2000026	regulation of multicellular organismal development

## Sheet: Summary
GO num	GO term	Total count	Netrophils	Macrophages	Dendritic cells	NK cells	ILC1	NKT cells	CD8 T cells	CD4 T cells	DNT cells	B cells	ILC2	ILC3
GO:0001775	cell activation	2	0	1	0	0	0	0	0	0	0	0	0	1
GO:0001816	cytokine production	1	0	1	0	0	0	0	0	0	0	0	0	0
GO:0002520	immune system development	1	0	1	0	0	0	0	0	0	0	0	0	0
GO:0002521	leukocyte differentiation	1	0	1	0	0	0	0	0	0	0	0	0	0
GO:0007159	leukocyte cell-cell adhesion	1	0	1	0	0	0	0	0	0	0	0	0	0
GO:0022407	regulation of cell-cell adhesion	1	0	1	0	0	0	0	0	0	0	0	0	0
GO:0032609	type II interferon production	1	0	1	0	0	0	0	0	0	0	0	0	0
GO:0032649	regulation of type II interferon production	1	0	1	0	0	0	0	0	0	0	0	0	0
GO:0042110	T cell activation	1	0	1	0	0	0	0	0	0	0	0	0	0
GO:0048534	hematopoietic or lymphoid organ development	1	0	1	0	0	0	0	0	0	0	0	0	0
GO:0050863	regulation of T cell activation	1	0	1	0	0	0	0	0	0	0	0	0	0
GO:0061441	renal artery morphogenesis	1	0	0	0	0	1	0	0	0	0	0	0	0
GO:0043227	membrane-bounded organelle	1	0	0	0	0	0	1	0	0	0	0	0	0
GO:0043231	intracellular membrane-bounded organelle	1	0	0	0	0	0	1	0	0	0	0	0	0
GO:0010008	endosome membrane	1	0	0	0	0	0	0	0	1	0	0	0	0
GO:0031902	late endosome membrane	1	0	0	0	0	0	0	0	1	0	0	0	0
GO:0000226	microtubule cytoskeleton organization	1	0	0	0	0	0	0	0	0	1	0	0	0
GO:0007017	microtubule-based process	1	0	0	0	0	0	0	0	0	1	0	0	0
GO:0007275	multicellular organism development	1	0	0	0	0	0	0	0	0	1	0	0	0
GO:0016358	dendrite development	1	0	0	0	0	0	0	0	0	1	0	0	0
GO:0030030	cell projection organization	1	0	0	0	0	0	0	0	0	1	0	0	0
GO:0030214	hyaluronan catabolic process	1	0	0	0	0	0	0	0	0	1	0	0	0
GO:0044237	cellular metabolic process	1	0	0	0	0	0	0	0	0	1	0	0	0
GO:0050773	regulation of dendrite development	1	0	0	0	0	0	0	0	0	1	0	0	0
GO:0050808	synapse organization	1	0	0	0	0	0	0	0	0	1	0	0	0
GO:0060996	dendritic spine development	1	0	0	0	0	0	0	0	0	1	0	0	0
GO:0060998	regulation of dendritic spine development	1	0	0	0	0	0	0	0	0	1	0	0	0
GO:0071493	cellular response to UV-B	1	0	0	0	0	0	0	0	0	1	0	0	0
GO:0120036	plasma membrane bounded cell projection organization	1	0	0	0	0	0	0	0	0	1	0	0	0
GO:2000026	regulation of multicellular organismal development	1	0	0	0	0	0	0	0	0	1	0	0	0
GO:0006169	adenosine salvage	1	0	0	0	0	0	0	0	0	0	0	1	0
GO:0006175	dATP biosynthetic process	1	0	0	0	0	0	0	0	0	0	0	1	0
GO:0046649	lymphocyte activation	1	0	0	0	0	0	0	0	0	0	0	0	1
GO:0032101	regulation of response to external stimulus	0	0	0	0	0	0	0	0	0	0	0	0	0
GO:0032602	chemokine production	0	0	0	0	0	0	0	0	0	0	0	0	0
GO:0033574	response to testosterone	0	0	0	0	0	0	0	0	0	0	0	0	0
GO:0038034	signal transduction in absence of ligand	0	0	0	0	0	0	0	0	0	0	0	0	0
GO:0038066	p38MAPK cascade	0	0	0	0	0	0	0	0	0	0	0	0	0
GO:0042088	T-helper 1 type immune response	0	0	0	0	0	0	0	0	0	0	0	0	0
GO:0048660	regulation of smooth muscle cell proliferation	0	0	0	0	0	0	0	0	0	0	0	0	0
GO:0051171	regulation of nitrogen compound metabolic process	0	0	0	0	0	0	0	0	0	0	0	0	0
GO:0071456	cellular response to hypoxia	0	0	0	0	0	0	0	0	0	0	0	0	0
GO:0097191	extrinsic apoptotic signaling pathway	0	0	0	0	0	0	0	0	0	0	0	0	0
GO:0097366	response to bronchodilator	0	0	0	0	0	0	0	0	0	0	0	0	0
GO:1900745	positive regulation of p38MAPK cascade	0	0	0	0	0	0	0	0	0	0	0	0	0
GO:1902624	positive regulation of neutrophil migration	0	0	0	0	0	0	0	0	0	0	0	0	0
GO:1904019	epithelial cell apoptotic process	0	0	0	0	0	0	0	0	0	0	0	0	0
GO:1905952	regulation of lipid localization	0	0	0	0	0	0	0	0	0	0	0	0	0
GO:0001501	skeletal system development	0	0	0	0	0	0	0	0	0	0	0	0	0
GO:0001568	blood vessel development	0	0	0	0	0	0	0	0	0	0	0	0	0
GO:0001655	urogenital system development	0	0	0	0	0	0	0	0	0	0	0	0	0
GO:0001763	morphogenesis of a branching structure	0	0	0	0	0	0	0	0	0	0	0	0	0
GO:0001957	intramembranous ossification	0	0	0	0	0	0	0	0	0	0	0	0	0
GO:0002367	cytokine production involved in immune response	0	0	0	0	0	0	0	0	0	0	0	0	0
GO:0006508	proteolysis	0	0	0	0	0	0	0	0	0	0	0	0	0
GO:0006809	nitric oxide biosynthetic process	0	0	0	0	0	0	0	0	0	0	0	0	0
GO:0006810	transport	0	0	0	0	0	0	0	0	0	0	0	0	0
GO:0007044	cell-substrate junction assembly	0	0	0	0	0	0	0	0	0	0	0	0	0
GO:0007154	cell communication	0	0	0	0	0	0	0	0	0	0	0	0	0
GO:0007155	cell adhesion	0	0	0	0	0	0	0	0	0	0	0	0	0
GO:0007159	leukocyte cell-cell adhesion	1	0	1	0	0	0	0	0	0	0	0	0	0
GO:0007167	enzyme-linked receptor protein signaling pathway	0	0	0	0	0	0	0	0	0	0	0	0	0
GO:0007565	female pregnancy	0	0	0	0	0	0	0	0	0	0	0	0	0
GO:0008104	protein localization	0	0	0	0	0	0	0	0	0	0	0	0	0
GO:0008285	negative regulation of cell population proliferation	0	0	0	0	0	0	0	0	0	0	0	0	0
GO:0009611	response to wounding	0	0	0	0	0	0	0	0	0	0	0	0	0
GO:0009719	response to endogenous stimulus	0	0	0	0	0	0	0	0	0	0	0	0	0
GO:0010035	response to inorganic substance	0	0	0	0	0	0	0	0	0	0	0	0	0
GO:0010638	positive regulation of organelle organization	0	0	0	0	0	0	0	0	0	0	0	0	0
GO:0016477	cell migration	0	0	0	0	0	0	0	0	0	0	0	0	0
GO:0019058	viral life cycle	0	0	0	0	0	0	0	0	0	0	0	0	0
GO:0019722	calcium-mediated signaling	0	0	0	0	0	0	0	0	0	0	0	0	0
GO:0019932	second-messenger-mediated signaling	0	0	0	0	0	0	0	0	0	0	0	0	0
GO:0022612	gland morphogenesis	0	0	0	0	0	0	0	0	0	0	0	0	0
GO:0023052	signaling	0	0	0	0	0	0	0	0	0	0	0	0	0
GO:0030029	actin filament-based process	0	0	0	0	0	0	0	0	0	0	0	0	0
GO:0030036	actin cytoskeleton organization	0	0	0	0	0	0	0	0	0	0	0	0	0
GO:0030155	regulation of cell adhesion	0	0	0	0	0	0	0	0	0	0	0	0	0
GO:0030162	regulation of proteolysis	0	0	0	0	0	0	0	0	0	0	0	0	0
GO:0030163	protein catabolic process	0	0	0	0	0	0	0	0	0	0	0	0	0
GO:0030198	extracellular matrix organization	0	0	0	0	0	0	0	0	0	0	0	0	0
GO:0030334	regulation of cell migration	0	0	0	0	0	0	0	0	0	0	0	0	0
GO:0031667	response to nutrient levels	0	0	0	0	0	0	0	0	0	0	0	0	0
GO:0032501	multicellular organismal process	0	0	0	0	0	0	0	0	0	0	0	0	0
GO:0032835	glomerulus development	0	0	0	0	0	0	0	0	0	0	0	0	0
GO:0032963	collagen metabolic process	0	0	0	0	0	0	0	0	0	0	0	0	0
GO:0034109	homotypic cell-cell adhesion	0	0	0	0	0	0	0	0	0	0	0	0	0
GO:0034620	cellular response to unfolded protein	0	0	0	0	0	0	0	0	0	0	0	0	0
GO:0034968	histone lysine methylation	0	0	0	0	0	0	0	0	0	0	0	0	0
GO:0035455	response to interferon-alpha	0	0	0	0	0	0	0	0	0	0	0	0	0
GO:0035457	cellular response to interferon-alpha	0	0	0	0	0	0	0	0	0	0	0	0	0
GO:0035458	cellular response to interferon-beta	0	0	0	0	0	0	0	0	0	0	0	0	0
GO:0036072	direct ossification	0	0	0	0	0	0	0	0	0	0	0	0	0
GO:0040012	regulation of locomotion	0	0	0	0	0	0	0	0	0	0	0	0	0
GO:0042060	wound healing	0	0	0	0	0	0	0	0	0	0	0	0	0
GO:0042136	neurotransmitter biosynthetic process	0	0	0	0	0	0	0	0	0	0	0	0	0
GO:0042221	response to chemical	0	0	0	0	0	0	0	0	0	0	0	0	0
GO:0043009	chordate embryonic development	0	0	0	0	0	0	0	0	0	0	0	0	0
GO:0043062	extracellular structure organization	0	0	0	0	0	0	0	0	0	0	0	0	0
GO:0043277	apoptotic cell clearance	0	0	0	0	0	0	0	0	0	0	0	0	0
GO:0043491	protein kinase B signaling	0	0	0	0	0	0	0	0	0	0	0	0	0
GO:0044248	cellular catabolic process	0	0	0	0	0	0	0	0	0	0	0	0	0
GO:0044706	multi-multicellular organism process	0	0	0	0	0	0	0	0	0	0	0	0	0
GO:0045428	regulation of nitric oxide biosynthetic process	0	0	0	0	0	0	0	0	0	0	0	0	0
GO:0045664	regulation of neuron differentiation	0	0	0	0	0	0	0	0	0	0	0	0	0
GO:0045785	positive regulation of cell adhesion	0	0	0	0	0	0	0	0	0	0	0	0	0
GO:0045861	negative regulation of proteolysis	0	0	0	0	0	0	0	0	0	0	0	0	0
GO:0048144	fibroblast proliferation	0	0	0	0	0	0	0	0	0	0	0	0	0
GO:0048589	developmental growth	0	0	0	0	0	0	0	0	0	0	0	0	0
GO:0048608	reproductive structure development	0	0	0	0	0	0	0	0	0	0	0	0	0
GO:0048732	gland development	0	0	0	0	0	0	0	0	0	0	0	0	0
GO:0048771	tissue remodeling	0	0	0	0	0	0	0	0	0	0	0	0	0
GO:0048856	anatomical structure development	0	0	0	0	0	0	0	0	0	0	0	0	0
GO:0051049	regulation of transport	0	0	0	0	0	0	0	0	0	0	0	0	0
GO:0051707	response to other organism	0	0	0	0	0	0	0	0	0	0	0	0	0
GO:0051716	cellular response to stimulus	0	0	0	0	0	0	0	0	0	0	0	0	0
GO:0051896	regulation of protein kinase B signaling	0	0	0	0	0	0	0	0	0	0	0	0	0
GO:0060343	trabecula formation	0	0	0	0	0	0	0	0	0	0	0	0	0
GO:0061383	trabecula morphogenesis	0	0	0	0	0	0	0	0	0	0	0	0	0
GO:0070208	protein heterotrimerization	0	0	0	0	0	0	0	0	0	0	0	0	0
GO:0070371	ERK1 and ERK2 cascade	0	0	0	0	0	0	0	0	0	0	0	0	0
GO:0071363	cellular response to growth factor stimulus	0	0	0	0	0	0	0	0	0	0	0	0	0
GO:0071702	organic substance transport	0	0	0	0	0	0	0	0	0	0	0	0	0
GO:0072593	reactive oxygen species metabolic process	0	0	0	0	0	0	0	0	0	0	0	0	0
GO:0090130	tissue migration	0	0	0	0	0	0	0	0	0	0	0	0	0
GO:0098609	cell-cell adhesion	0	0	0	0	0	0	0	0	0	0	0	0	0
GO:0140115	export across plasma membrane	0	0	0	0	0	0	0	0	0	0	0	0	0
GO:1901699	cellular response to nitrogen compound	0	0	0	0	0	0	0	0	0	0	0	0	0
GO:1903276	regulation of sodium ion export across plasma membrane	0	0	0	0	0	0	0	0	0	0	0	0	0
GO:1903409	reactive oxygen species biosynthetic process	0	0	0	0	0	0	0	0	0	0	0	0	0
GO:1903426	regulation of reactive oxygen species biosynthetic process	0	0	0	0	0	0	0	0	0	0	0	0	0
GO:1904018	positive regulation of vasculature development	0	0	0	0	0	0	0	0	0	0	0	0	0
GO:2000108	positive regulation of leukocyte apoptotic process	0	0	0	0	0	0	0	0	0	0	0	0	0
GO:2000377	regulation of reactive oxygen species metabolic process	0	0	0	0	0	0	0	0	0	0	0	0	0
GO:2001057	reactive nitrogen species metabolic process	0	0	0	0	0	0	0	0	0	0	0	0	0
GO:0001961	positive regulation of cytokine-mediated signaling pathway	0	0	0	0	0	0	0	0	0	0	0	0	0
GO:0002285	lymphocyte activation involved in immune response	0	0	0	0	0	0	0	0	0	0	0	0	0
GO:0006260	DNA replication	0	0	0	0	0	0	0	0	0	0	0	0	0
GO:0006396	RNA processing	0	0	0	0	0	0	0	0	0	0	0	0	0
GO:0006397	mRNA processing	0	0	0	0	0	0	0	0	0	0	0	0	0
GO:0006984	ER-nucleus signaling pathway	0	0	0	0	0	0	0	0	0	0	0	0	0
GO:0006986	response to unfolded protein	0	0	0	0	0	0	0	0	0	0	0	0	0
GO:0008380	RNA splicing	0	0	0	0	0	0	0	0	0	0	0	0	0
GO:0016049	cell growth	0	0	0	0	0	0	0	0	0	0	0	0	0
GO:0034340	response to type I interferon	0	0	0	0	0	0	0	0	0	0	0	0	0
GO:0035966	response to topologically incorrect protein	0	0	0	0	0	0	0	0	0	0	0	0	0
GO:0038093	Fc receptor signaling pathway	0	0	0	0	0	0	0	0	0	0	0	0	0
GO:0043620	regulation of DNA-templated transcription in response to stress	0	0	0	0	0	0	0	0	0	0	0	0	0
GO:0046834	lipid phosphorylation	0	0	0	0	0	0	0	0	0	0	0	0	0
GO:0046854	phosphatidylinositol phosphate biosynthetic process	0	0	0	0	0	0	0	0	0	0	0	0	0
GO:0060337	type I interferon-mediated signaling pathway	0	0	0	0	0	0	0	0	0	0	0	0	0
GO:0070988	demethylation	0	0	0	0	0	0	0	0	0	0	0	0	0
GO:0071216	cellular response to biotic stimulus	0	0	0	0	0	0	0	0	0	0	0	0	0
GO:0071396	cellular response to lipid	0	0	0	0	0	0	0	0	0	0	0	0	0
GO:0071557	histone H3-K27 demethylation	0	0	0	0	0	0	0	0	0	0	0	0	0
GO:0071706	tumor necrosis factor superfamily cytokine production	0	0	0	0	0	0	0	0	0	0	0	0	0
GO:1901701	cellular response to oxygen-containing compound	0	0	0	0	0	0	0	0	0	0	0	0	0
GO:1902532	negative regulation of intracellular signal transduction	0	0	0	0	0	0	0	0	0	0	0	0	0
GO:1903555	regulation of tumor necrosis factor superfamily cytokine production	0	0	0	0	0	0	0	0	0	0	0	0	0
GO:0007043	cell-cell junction assembly	0	0	0	0	0	0	0	0	0	0	0	0	0
GO:0034067	protein localization to Golgi apparatus	0	0	0	0	0	0	0	0	0	0	0	0	0
GO:1902531	regulation of intracellular signal transduction	0	0	0	0	0	0	0	0	0	0	0	0	0
GO:0006334	nucleosome assembly	0	0	0	0	0	0	0	0	0	0	0	0	0
GO:0007275	multicellular organism development	1	0	0	0	0	0	0	0	0	1	0	0	0
GO:0016192	vesicle-mediated transport	0	0	0	0	0	0	0	0	0	0	0	0	0
GO:0018105	peptidyl-serine phosphorylation	0	0	0	0	0	0	0	0	0	0	0	0	0
GO:0030030	cell projection organization	1	0	0	0	0	0	0	0	0	1	0	0	0
GO:0031098	stress-activated protein kinase signaling cascade	0	0	0	0	0	0	0	0	0	0	0	0	0
GO:0042325	regulation of phosphorylation	0	0	0	0	0	0	0	0	0	0	0	0	0
GO:0044087	regulation of cellular component biogenesis	0	0	0	0	0	0	0	0	0	0	0	0	0
GO:0045653	negative regulation of megakaryocyte differentiation	0	0	0	0	0	0	0	0	0	0	0	0	0
GO:0046777	protein autophosphorylation	0	0	0	0	0	0	0	0	0	0	0	0	0
GO:0051302	regulation of cell division	0	0	0	0	0	0	0	0	0	0	0	0	0
GO:0051338	regulation of transferase activity	0	0	0	0	0	0	0	0	0	0	0	0	0
GO:0051607	defense response to virus	0	0	0	0	0	0	0	0	0	0	0	0	0
GO:0051781	positive regulation of cell division	0	0	0	0	0	0	0	0	0	0	0	0	0
GO:0060011	Sertoli cell proliferation	0	0	0	0	0	0	0	0	0	0	0	0	0
GO:0070498	interleukin-1-mediated signaling pathway	0	0	0	0	0	0	0	0	0	0	0	0	0
GO:0071103	DNA conformation change	0	0	0	0	0	0	0	0	0	0	0	0	0
GO:0097530	granulocyte migration	0	0	0	0	0	0	0	0	0	0	0	0	0
GO:0120036	plasma membrane bounded cell projection organization	1	0	0	0	0	0	0	0	0	1	0	0	0
GO:2000660	negative regulation of interleukin-1-mediated signaling pathway	0	0	0	0	0	0	0	0	0	0	0	0	0
GO:0002521	leukocyte differentiation	1	0	1	0	0	0	0	0	0	0	0	0	0
GO:0002683	negative regulation of immune system process	0	0	0	0	0	0	0	0	0	0	0	0	0
GO:0009615	response to virus	0	0	0	0	0	0	0	0	0	0	0	0	0
GO:0031324	negative regulation of cellular metabolic process	0	0	0	0	0	0	0	0	0	0	0	0	0
GO:0032635	interleukin-6 production	0	0	0	0	0	0	0	0	0	0	0	0	0
GO:0032675	regulation of interleukin-6 production	0	0	0	0	0	0	0	0	0	0	0	0	0
GO:0032774	RNA biosynthetic process	0	0	0	0	0	0	0	0	0	0	0	0	0
GO:0043065	positive regulation of apoptotic process	0	0	0	0	0	0	0	0	0	0	0	0	0
GO:0046136	positive regulation of vitamin metabolic process	0	0	0	0	0	0	0	0	0	0	0	0	0
GO:0060558	regulation of calcidiol 1-monooxygenase activity	0	0	0	0	0	0	0	0	0	0	0	0	0
GO:0071345	cellular response to cytokine stimulus	0	0	0	0	0	0	0	0	0	0	0	0	0
GO:0071621	granulocyte chemotaxis	0	0	0	0	0	0	0	0	0	0	0	0	0
GO:0006479	protein methylation	0	0	0	0	0	0	0	0	0	0	0	0	0
GO:0008213	protein alkylation	0	0	0	0	0	0	0	0	0	0	0	0	0
GO:0008277	regulation of G protein-coupled receptor signaling pathway	0	0	0	0	0	0	0	0	0	0	0	0	0
GO:0009892	negative regulation of metabolic process	0	0	0	0	0	0	0	0	0	0	0	0	0
GO:0018205	peptidyl-lysine modification	0	0	0	0	0	0	0	0	0	0	0	0	0
GO:0030521	androgen receptor signaling pathway	0	0	0	0	0	0	0	0	0	0	0	0	0
GO:0031400	negative regulation of protein modification process	0	0	0	0	0	0	0	0	0	0	0	0	0
GO:0033044	regulation of chromosome organization	0	0	0	0	0	0	0	0	0	0	0	0	0
GO:0033365	protein localization to organelle	0	0	0	0	0	0	0	0	0	0	0	0	0
GO:0034728	nucleosome organization	0	0	0	0	0	0	0	0	0	0	0	0	0
GO:0043409	negative regulation of MAPK cascade	0	0	0	0	0	0	0	0	0	0	0	0	0
GO:0043414	macromolecule methylation	0	0	0	0	0	0	0	0	0	0	0	0	0
GO:0045936	negative regulation of phosphate metabolic process	0	0	0	0	0	0	0	0	0	0	0	0	0
GO:0051348	negative regulation of transferase activity	0	0	0	0	0	0	0	0	0	0	0	0	0
GO:0071824	protein-DNA complex subunit organization	0	0	0	0	0	0	0	0	0	0	0	0	0
GO:1902275	regulation of chromatin organization	0	0	0	0	0	0	0	0	0	0	0	0	0
GO:0000278	mitotic cell cycle	0	0	0	0	0	0	0	0	0	0	0	0	0
GO:0001649	osteoblast differentiation	0	0	0	0	0	0	0	0	0	0	0	0	0
GO:0002687	positive regulation of leukocyte migration	0	0	0	0	0	0	0	0	0	0	0	0	0
GO:0006412	translation	0	0	0	0	0	0	0	0	0	0	0	0	0
GO:0007041	lysosomal transport	0	0	0	0	0	0	0	0	0	0	0	0	0
GO:0009790	embryo development	0	0	0	0	0	0	0	0	0	0	0	0	0
GO:0009894	regulation of catabolic process	0	0	0	0	0	0	0	0	0	0	0	0	0
GO:0010469	regulation of signaling receptor activity	0	0	0	0	0	0	0	0	0	0	0	0	0
GO:0010586	miRNA metabolic process	0	0	0	0	0	0	0	0	0	0	0	0	0
GO:0010606	positive regulation of cytoplasmic mRNA processing body assembly	0	0	0	0	0	0	0	0	0	0	0	0	0
GO:0010608	post-transcriptional regulation of gene expression	0	0	0	0	0	0	0	0	0	0	0	0	0
GO:0031622	positive regulation of fever generation	0	0	0	0	0	0	0	0	0	0	0	0	0
GO:0032633	interleukin-4 production	0	0	0	0	0	0	0	0	0	0	0	0	0
GO:0032673	regulation of interleukin-4 production	0	0	0	0	0	0	0	0	0	0	0	0	0
GO:0032713	negative regulation of interleukin-4 production	0	0	0	0	0	0	0	0	0	0	0	0	0
GO:0033962	P-body assembly	0	0	0	0	0	0	0	0	0	0	0	0	0
GO:0034113	heterotypic cell-cell adhesion	0	0	0	0	0	0	0	0	0	0	0	0	0
GO:0034248	regulation of amide metabolic process	0	0	0	0	0	0	0	0	0	0	0	0	0
GO:0045661	regulation of myoblast differentiation	0	0	0	0	0	0	0	0	0	0	0	0	0
GO:0045672	positive regulation of osteoclast differentiation	0	0	0	0	0	0	0	0	0	0	0	0	0
GO:0048513	animal organ development	0	0	0	0	0	0	0	0	0	0	0	0	0
GO:0050900	leukocyte migration	0	0	0	0	0	0	0	0	0	0	0	0	0
GO:0051649	establishment of localization in cell	0	0	0	0	0	0	0	0	0	0	0	0	0
GO:0052472	modulation by host of symbiont transcription	0	0	0	0	0	0	0	0	0	0	0	0	0
GO:0061614	miRNA transcription	0	0	0	0	0	0	0	0	0	0	0	0	0
GO:0070098	chemokine-mediated signaling pathway	0	0	0	0	0	0	0	0	0	0	0	0	0
GO:0072594	establishment of protein localization to organelle	0	0	0	0	0	0	0	0	0	0	0	0	0
GO:0090503	RNA phosphodiester bond hydrolysis, exonucleolytic	0	0	0	0	0	0	0	0	0	0	0	0	0
GO:1901031	regulation of response to reactive oxygen species	0	0	0	0	0	0	0	0	0	0	0	0	0
GO:1902882	regulation of response to oxidative stress	0	0	0	0	0	0	0	0	0	0	0	0	0
GO:1903311	regulation of mRNA metabolic process	0	0	0	0	0	0	0	0	0	0	0	0	0
GO:1904761	negative regulation of myofibroblast differentiation	0	0	0	0	0	0	0	0	0	0	0	0	0
GO:1990090	cellular response to nerve growth factor stimulus	0	0	0	0	0	0	0	0	0	0	0	0	0
GO:0010628	positive regulation of gene expression	0	0	0	0	0	0	0	0	0	0	0	0	0
GO:0043604	amide biosynthetic process	0	0	0	0	0	0	0	0	0	0	0	0	0
GO:0046827	positive regulation of protein export from nucleus	0	0	0	0	0	0	0	0	0	0	0	0	0
GO:0005840	ribosome	0	0	0	0	0	0	0	0	0	0	0	0	0
GO:0022625	cytosolic large ribosomal subunit	0	0	0	0	0	0	0	0	0	0	0	0	0
GO:0044391	ribosomal subunit	0	0	0	0	0	0	0	0	0	0	0	0	0

## Sheet: גיליון2
GO:0001775	4
GO:0001816	6
GO:0001817	4
GO:0002376	7
GO:0006351	2
GO:0006357	8
GO:0006366	8
GO:0006468	5
GO:0006950	8
GO:0006954	2
GO:0006955	3
GO:0006979	2
GO:0007249	3
GO:0008219	7
GO:0008283	4
GO:0009058	8
GO:0009059	9
GO:0009410	3
GO:0009605	4
GO:0009607	4
GO:0009628	3
GO:0010033	2
GO:0010646	5
GO:0010941	6
GO:0010942	2
GO:0016310	4
GO:0019222	8
GO:0023051	5
GO:0031399	6
GO:0032496	2
GO:0032502	6
GO:0033002	2
GO:0033554	5
GO:0034641	10
GO:0034645	9
GO:0035556	6
GO:0042127	3
GO:0044249	9
GO:0044260	9
GO:0044271	9
GO:0048518	8
GO:0048519	8
GO:0048522	5
GO:0048523	4
GO:0048583	7
GO:0048659	3
GO:0048661	2
GO:0050790	3
GO:0050896	2
GO:0051174	6
GO:0051239	4
GO:0051246	8
GO:0065009	5
GO:0071310	2
GO:1901576	9
GO:1901698	3
GO:1901700	3
GO:2000112	9
GO:0000165	3
GO:0001503	2
GO:0001660	3
GO:0001932	2
GO:0001959	2
GO:0002252	3
GO:0002520	4
GO:0002682	6
GO:0006139	8
GO:0006725	8
GO:0006793	5
GO:0006807	8
GO:0006915	6
GO:0006952	2
GO:0006996	7
GO:0007166	3
GO:0008152	7
GO:0009056	3
GO:0009966	2
GO:0009987	6
GO:0010467	8
GO:0015833	3
GO:0016032	3
GO:0016070	8
GO:0016567	3
GO:0018130	7
GO:0018193	3
GO:0019438	7
GO:0019538	8
GO:0022607	2
GO:0030097	4
GO:0031323	6
GO:0031650	2
GO:0032879	2
GO:0033036	4
GO:0034654	5
GO:0035239	2
GO:0035456	2
GO:0036211	5
GO:0036293	2
GO:0040007	3
GO:0040008	3
GO:0040011	2
GO:0042592	2
GO:0042886	3
GO:0042981	3
GO:0043170	8
GO:0043412	6
GO:0043618	2
GO:0043933	4
GO:0044085	2
GO:0044089	2
GO:0044237	8
GO:0044238	8
GO:0044419	3
GO:0045071	2
GO:0045595	3
GO:0046483	8
GO:0048534	4
GO:0048870	2
GO:0050793	3
GO:0050794	5
GO:0051093	3
GO:0051128	4
GO:0051179	2
GO:0051641	5
GO:0051674	2
GO:0060759	3
GO:0065007	3
GO:0065008	2
GO:0070482	2
GO:0070647	6
GO:0070887	3
GO:0071466	2
GO:0071704	7
GO:0071705	3
GO:0071840	7
GO:0090304	8
GO:1901360	8
GO:1901362	7
GO:1901564	7
GO:0006259	3
GO:0006325	4
GO:0009057	3
GO:0010604	3
GO:0010605	2
GO:0016071	2
GO:0016570	4
GO:0022407	2
GO:0022613	3
GO:0032446	3
GO:0033043	3
GO:0034097	2
GO:0043903	2
GO:0044265	3
GO:0046907	2
GO:0048525	2
GO:0050792	3
GO:0051276	4
GO:0080134	4
GO:0060255	2
GO:0006518	4
GO:0007049	2
GO:0043112	2
GO:0051052	2
GO:0051726	2
GO:1901566	2
GO:0043603	3
GO:0006796	2
