# Supplementary material for: Single-cell analysis of the aged ovarian immune system reveals a shift towards adaptive immunity and attenuated cell function
Source: eLife. 2023 Apr 25;12:e74915. doi: 10.7554/eLife.74915 (PMC10188116; doi:10.7554/eLife.74915)
Supplement: Supplementary file 4. [file elife-74915-supp4.xlsx]

## Sheet: inflammation_genes_profiler
	Significantly Upregulated terms	is “Inflammatory response” (GO:0006954) enriched?	is “negative regulation of neuroinflammatory response” (GO:0150079) enriched?	Significantly Downregulated terms	is “Inflammatory response” (GO:0006954) enriched?	is “negative regulation of neuroinflammatory response” (GO:0150079) enriched?
Macrophsges	36	0	0	312	1	0
Dendritic	5	0	0	93	1	0
ILC1	14	0	0	38	0	0
CD8 T cells	198	0	0	278	0	0
CD4 T cells	196	0	0	247	0	0
NKT	108	0	0	67	0	0
DNT cells	164	0	0	16	0	0
NK	45	0	1	350	0	0
Neutrophils	85	0	0	193	1	0
B cells	168	0	0	130	0	0
ILC2	172	0	0	260	0	0
ILC3	135	0	0	176	1	0
