# Supplementary material for: Single-cell analysis of the aged ovarian immune system reveals a shift towards adaptive immunity and attenuated cell function
Source: eLife. 2023 Apr 25;12:e74915. doi: 10.7554/eLife.74915 (PMC10188116; doi:10.7554/eLife.74915)
Supplement: Supplementary file 5. [file elife-74915-supp5.xlsx]

## Sheet: Sheet1
	IL1R1
	IL1R2
	IL6RA
	IL6ST
	CXCR1
	CXCR2
	TGFBR1
	TGFBR2
	LRP1
	TMEM219
	Plaur
	CCR5
	CCR1
	CCR3
	CCR6
	CD74
	Ighm
	Ccr2
	Csf2ra
	Clec4a2
	Clec4a3
	Ifngr1
	Cxcr6
	Csf1r
